# Supplementary material for: The role and therapeutic significance of the anoikis pathway in renal clear cell carcinoma
Source: Front Oncol. 2022 Sep 29;12:1009984. doi: 10.3389/fonc.2022.1009984 (PMC9557223; doi:10.3389/fonc.2022.1009984)
Supplement: Supplementary file 1 [file Table_1.xlsx]

## Sheet: survival curve
id	futime	fustat	NOTCH1	ANKRD13C	PDK4	STK11	DAPK2	PIK3CA	CEACAM6	TLE1	MAP3K7	NTRK2	ITGA5	BCL2	PTK2	MTOR	CEACAM5	BMF	CRYBA1	CAV1	AKT1	SRC	TFDP1	AES	ZNF304	PTRH2	SNAI2	MYBBP1A	MCL1	SIK1	CHEK2	ITGB1	IKBKG	E2F1	BRMS1	TSC2
TCGA-B0-5080	342	1	18.674	5.4659	9.66235	6.59633	1.06344	3.99234	0.0778447	9.32216	6.26958	2.16929	87.1777	14.413	12.254	4.82541	0.01486	3.63268	0	158.381	11.208	8.74482	17.1425	70.1836	3.94706	3.75921	11.0804	6.04611	119.156	2.20202	1.27419	132.399	2.22646	2.80011	15.7618	5.55295
TCGA-BP-4344	1666	0	13.8752	6.29168	201.432	5.95115	0.60889	4.34831	0	11.585	6.19739	4.71813	31.8236	18.6601	15.5498	4.33679	0	4.50896	0.135273	78.9981	10.9424	7.60824	18.7768	54.9264	6.05895	3.04017	14.6299	4.62029	148.967	1.24201	1.33113	135.877	1.30872	0.922589	12.3328	7.20004
TCGA-DV-A4VZ	365	0	4.55583	3.47081	33.1152	7.18288	3.845	1.93337	0.033157	18.8942	7.18042	2.87241	12.0895	6.00702	7.23286	3.13297	0.00590748	1.04409	0.02549	44.0479	13.4359	11.3618	14.3475	84.6999	3.23631	4.75233	2.57201	11.8635	67.1857	1.43736	1.5343	63.9124	0.854525	0.388124	18.5243	5.79818
TCGA-CJ-4868	646	1	9.33587	4.91784	46.8939	6.12586	1.20694	4.52207	0.00680529	6.54082	4.64711	1.12503	100.494	7.58712	8.48806	3.87323	0	3.69867	0.130792	112.275	10.8538	10.2628	12.2864	65.9473	2.74887	2.79997	11.386	7.93891	102.081	2.41449	1.87038	122.535	1.80683	3.37726	14.4826	5.52067
TCGA-CJ-5682	1883	0	6.78915	6.06406	101.309	6.89378	0.389375	2.97719	0.0072059	7.40103	3.72474	1.87491	30.7029	17.373	9.35261	3.18118	0	2.14393	0.0830947	99.192	7.65458	12.0197	18.2006	86.0061	3.09678	2.67713	5.75349	6.52007	68.8451	0	1.12564	88.994	1.07189	1.86272	18.397	5.0131
TCGA-BP-4985	952	1	6.3273	3.29438	6.16022	2.63676	0.138406	3.5096	0.133819	3.68171	6.20724	0.964015	65.5655	7.38571	10.6667	4.0897	0.015382	1.35931	0.0829638	153.051	8.9515	18.5521	8.4098	40.5012	2.27819	3.44931	5.01122	7.25955	85.9864	0.0215713	0.699764	142.486	2.03836	1.60538	11.9536	3.28863
TCGA-BP-4332	1133	0	12.1479	6.65163	42.1397	5.58817	0.263724	4.13476	0.0388374	7.19984	6.81119	1.66229	31.4526	20.7461	14.635	3.76834	0.00494252	5.06096	0.17061	77.377	13.1223	4.64168	21.4685	67.4926	4.96714	3.14012	7.30898	6.74539	87.5593	0.242594	1.78652	82.3132	1.19957	1.19743	13.1545	7.39842
TCGA-CZ-4854	1404	1	7.47906	5.37681	17.7168	6.59622	0.873174	3.15097	0.0345947	6.06284	6.06087	0.334065	25.2497	7.27305	8.1146	3.93418	0	2.5005	0.094983	76.9759	7.92002	10.6082	8.93467	55.462	3.88782	2.16385	3.7543	7.67661	69.1534	0.873634	1.79164	59.7461	1.56432	1.65115	11.6155	7.81901
TCGA-CW-6097	571	1	9.87347	6.06617	62.4986	4.32566	0.175755	6.00451	0.0121531	4.95205	7.24683	1.51731	30.9893	20.4933	9.15674	5.03007	0	3.27195	0	183.112	7.84392	10.2649	15.3183	56.0534	2.98565	3.00095	7.11917	10.0546	124.397	0.220148	1.81337	113.637	1.58707	2.71182	12.6662	5.24467
TCGA-BP-4969	1794	0	10.9457	3.98116	346.322	7.18785	0.410214	1.92474	0.014715	3.64335	3.81968	0.215402	13.4369	7.03681	8.64085	3.22031	0.0131086	1.20101	0.0754159	19.6239	8.73902	5.38348	10.2481	51.07	3.82615	2.6845	2.44034	6.76223	48.4481	0.171577	0.646944	24.3391	0.962937	2.811	13.1241	11.0556
TCGA-CJ-4905	1496	0	21.2411	3.95696	115.29	5.22191	0.609631	5.18809	0	9.58852	5.62416	3.48662	51.9241	29.0153	16.0783	6.04812	0	4.30839	0.0166421	97.7572	11.6157	7.76936	17.0392	64.8072	4.91398	2.16049	10.8166	6.40774	66.3806	0.259625	0.76246	207.218	1.3592	1.48346	11.4163	7.33468
TCGA-CZ-4860	206	1	2.48477	4.25657	0.598469	3.24297	0.277718	3.874	0.0244789	2.9695	7.08122	0.0359551	33.394	0.816785	6.74136	3.2722	0.00872265	2.24389	0.0564555	51.7878	7.20054	12.4955	4.84483	27.7488	2.19476	5.11933	2.62564	5.37648	44.4839	0.00305811	3.25389	69.6808	1.35066	2.61468	17.3668	3.73783
TCGA-B0-4844	313	1	7.38345	4.80203	107.754	7.75071	0.833714	1.29846	0.014274	6.89073	3.10442	2.83255	26.8188	3.76535	5.47011	3.28737	0.0190737	1.81951	0.0548669	54.2206	7.98732	9.85721	7.97108	75.0494	2.06527	3.31328	1.78495	7.34266	49.9181	0.0356646	3.61283	24.4275	1.06164	2.8718	18.2731	6.43026
TCGA-CJ-4888	1567	1	5.44954	4.20395	193.821	6.60477	0.384195	3.63387	0.00928737	6.79161	6.76759	0.785777	34.3474	7.32386	7.24303	3.64049	0.00413676	5.25843	0.0892477	71.8834	8.5604	12.8775	9.66051	60.3817	3.00732	4.3594	6.27889	7.87109	99.5482	0.266859	2.50808	66.6918	1.57026	5.36778	14.9167	6.08905
TCGA-B2-4102	202	0	10.8488	7.17024	77.0144	6.58041	0.21146	5.25959	0.00561378	4.86828	7.3706	5.55655	17.3865	20.8192	10.2012	6.0961	0.00500095	4.26837	0.129471	40.277	9.22667	8.83152	15.4479	53.3013	6.02211	2.45071	3.29601	6.30033	77.7915	0.0140264	1.71664	77.3006	1.4565	2.33418	10.9724	8.88785
TCGA-B2-5633	358	0	16.3304	10.2487	368.074	4.80956	3.36179	9.82994	0.49275	6.05192	12.5568	1.61844	29.2614	33.8809	17.4066	9.59409	0.313542	6.35011	3.19282	31.5048	6.69423	5.12185	11.6464	15.5553	5.23929	5.79249	4.25535	5.99872	112.693	0	2.1681	95.4855	1.32714	0.892658	5.02487	8.51551
TCGA-B0-5106	1598	1	12.7179	5.13932	103.649	6.73678	2.4731	3.35853	0.0118222	7.99435	6.29062	0.620165	48.8742	13.8276	9.9931	4.17856	0.00526579	3.35177	0.249933	58.0641	7.3588	7.30494	9.93415	54.3534	3.10789	2.70609	6.1901	8.25977	115.85	2.01969	1.45039	75.0286	1.18601	1.16763	12.8164	9.01787
TCGA-BP-4756	374	0	2.53487	7.43391	7.60074	4.81407	0.24979	2.99239	0	0.638512	4.66993	1.00804	2.69247	4.31477	10.7803	6.12173	0	1.44496	0.0396509	8.34888	8.64776	11.1368	12.2153	35.6038	2.78693	3.21138	0.620826	6.98885	44.091	0.248074	1.32255	22.9221	1.04824	1.45905	13.8817	11.5969
TCGA-CW-5581	2799	0	10.4448	5.57362	62.6005	4.98038	0.166826	4.52549	0.00492747	6.5476	5.73703	3.35144	39.2906	23.3673	10.4675	6.10529	0	1.68415	0.0378807	46.9285	9.04177	6.00801	11.2518	53.2597	4.4832	2.19869	2.83375	5.39674	69.8362	0.123116	0.769722	75.6009	1.86225	2.29515	13.2141	9.89052
TCGA-BP-4965	1871	0	12.9391	6.93853	83.5281	4.59444	0.243055	6.31268	0.0168328	6.43376	6.50293	2.92151	33.3885	21.7264	14.4327	4.42732	0	2.62386	0	48.0411	8.45858	8.7831	16.8554	45.2783	4.98244	2.4538	6.93388	5.08851	86.7301	0.0147203	1.3445	145.698	1.24322	2.46709	11.0145	5.16925
TCGA-AK-3447	1217	0	0.498614	0.821787	87.2298	2.7256	0.0302919	0.49579	0.0142214	8.5772	2.17408	0.0106575	1.0311	2.6246	2.64047	1.08697	0.0126689	0.561768	0	34.7005	5.94359	1.42934	6.70603	169.375	1.96818	1.67571	0.332849	0.430327	11.6676	0.581853	0.151944	11.0079	0.780994	2.74849	15.4002	0.915218
TCGA-CW-5583	2489	0	16.9863	5.52081	135.742	4.68651	0.19085	6.16499	0.00465135	10.2433	6.09519	4.14103	27.5694	24.0118	13.4976	5.61441	0	3.02839	0.017879	32.9128	11.0418	8.78137	15.1674	46.331	6.38493	2.15634	4.87713	6.32557	95.5878	1.62123	0.702599	107.406	1.23898	2.05878	10.6159	8.06235
TCGA-A3-3326	1137	0	10.7037	4.98037	215.23	5.59671	0.264148	3.3127	0.0277201	7.94974	5.14494	3.33413	18.133	20.6731	9.49016	4.17808	0	5.74677	0.106551	41.7724	10.9599	12.5699	18.0466	42.2051	4.50635	1.99903	4.07809	7.03765	90.8052	0.00865758	1.43999	53.0257	1.46237	2.75471	11.8793	8.48985
TCGA-EU-5907	127	0	5.35479	4.21454	45.5986	4.89066	0.0506171	3.26056	0.0161253	2.48278	4.06884	0.943779	9.72334	13.7851	8.22625	3.42335	0	1.51338	0	110.786	10.8971	7.54801	12.7804	46.0234	3.51836	4.01813	1.44494	7.58485	79.0682	0.08058	2.24565	99.0344	1.24116	1.38618	15.0442	4.91435
TCGA-DV-5566	1398	0	6.30376	6.0986	16.9314	6.70758	0.260531	2.90627	0	7.54513	4.68898	0.434821	23.4754	11.6272	10.2096	3.87109	0	1.70213	0.0583846	83.2037	11.8012	10.3243	17.7449	64.3342	1.84062	3.52571	2.23458	7.81342	153.411	0.502854	1.17516	45.8523	1.28734	4.67649	18.3844	5.89003
TCGA-BP-4989	118	0	7.29979	4.55878	201.012	6.12785	0.409218	2.91222	0.0136543	2.95601	6.88686	0.5164	13.3355	7.27803	7.61769	3.67935	0	6.04909	0.174949	51.2557	8.31317	7.83031	12.959	54.8822	2.80291	4.41639	6.88461	8.03943	96.4581	0.56576	2.25703	55.6355	1.48002	2.69162	15.195	9.85021
TCGA-BP-4994	1308	0	5.4025	4.7162	23.9581	5.93864	2.36229	7.32303	0.00718681	9.11389	6.21877	0.355462	9.9119	20.3173	9.06287	5.11024	0.00320113	4.41944	0.0552497	64.1662	14.0198	6.73657	12.9576	66.6304	6.48887	2.03145	1.35526	4.02049	73.184	0.79234	0.556032	51.6698	1.33009	1.78768	14.5879	7.96914
TCGA-CJ-4872	1435	0	12.9522	4.86727	58.8665	4.40161	0.406331	3.34519	0	8.88148	5.03466	2.8749	47.8745	7.18442	11.1304	3.72143	0	3.74878	0.0809996	102.43	8.72487	6.44579	12.9324	69.3333	2.7873	3.06983	9.06085	5.03633	63.0704	0.858876	1.4712	93.1243	1.18458	1.49029	10.3288	6.18067
TCGA-B0-4848	883	1	8.47374	7.21096	3.7507	5.5825	0.349806	3.6415	0.0214699	5.03088	5.90856	1.3054	30.0923	10.8284	8.12838	4.23179	0.0127508	4.27057	0	115.984	8.84092	8.98603	12.6463	54.5433	3.10404	2.39617	3.69458	7.34171	75.6201	0.429152	1.82456	98.5454	1.24405	2.27758	13.2321	5.92746
TCGA-CJ-4884	1759	0	7.68054	5.46193	56.4311	7.02509	0.420438	3.12637	0.00472333	6.42032	5.36571	0.973406	32.5031	9.25307	8.92295	4.35478	0.00841542	4.27678	0.199712	79.6249	6.44841	16.475	16.3886	63.1941	2.61164	3.01694	4.37775	5.3707	72.9454	0.0796606	1.50351	57.6337	1.41338	4.69386	14.817	4.94649
TCGA-B0-5703	1203	0	8.05707	3.33761	214.728	5.95186	0.159866	3.03021	0	10.5356	5.69236	0.657477	16.6739	18.2048	13.2339	2.7413	0	1.30885	0	43.5768	11.0067	7.66445	7.55088	75.76	2.54057	4.15807	3.49651	6.90269	66.0623	0.5599	1.2659	57.5956	1.06296	4.08203	15.3169	6.12369
TCGA-CJ-4639	2308	0	18.098	7.30537	55.6232	5.26015	0.744919	6.2265	0.0524583	6.21135	7.05586	0.32498	31.4486	19.8431	12.4526	4.73169	0.00778861	3.53693	0	71.586	9.23724	7.133	14.1943	45.0018	5.37265	2.68526	5.7998	5.77725	93.5244	0.00546127	1.04364	98.3717	1.09639	1.97223	12.1319	7.36137
TCGA-CJ-4899	1528	0	12.8892	5.76823	70.5196	6.06319	0.293512	5.92205	0.00412957	13.1249	7.27397	10.7578	36.265	20.3234	15.9391	5.13019	0	4.92152	0.111113	48.8885	13.6852	6.42448	17.155	55.0764	5.23115	3.07907	7.58305	6.20724	117.554	2.01459	1.19279	131.719	1.3107	2.34143	10.4076	7.88664
TCGA-B0-4819	183	1	6.77593	5.31353	23.8939	5.05332	0.923019	2.56847	0.0491545	4.26956	6.56738	1.30032	28.5457	7.16336	6.85033	4.29083	0.0437885	8.16955	0.0944707	46.2885	9.05197	12.6959	11.1332	61.1383	2.40458	3.35487	4.04303	6.43623	202.506	3.48874	1.73399	45.8469	0.786444	1.80557	15.545	6.36379
TCGA-AK-3425	3343	0	5.55765	5.08121	34.501	3.37072	1.19194	2.93339	0.0198361	4.29841	4.98704	0.524244	39.702	7.7613	9.70228	3.2104	0.0117805	5.8165	0.050831	135.634	11.6285	6.87328	13.0002	39.4076	2.68394	2.57996	6.94182	5.57607	101.666	0.421275	2.35806	87.9778	1.34952	1.70114	21.3197	4.50741
TCGA-DV-5575	1006	0	7.85259	5.66039	140.87	5.18451	0.197479	4.74937	0	8.22631	3.87341	1.28275	29.4776	23.6054	12.5137	3.97723	0.00541112	1.92294	0.0233482	73.0594	11.2506	5.74384	15.8031	53.9429	3.91766	2.95286	4.48433	7.36997	222.309	3.21369	1.13684	84.424	1.30279	6.22887	12.6318	5.39602
TCGA-CZ-5459	1515	0	8.81149	4.05116	54.7049	6.59202	0.15326	1.77552	0	7.08578	4.36603	0.377288	24.8008	17.3298	7.92769	3.83344	0.0117101	2.79881	0.0505273	47.249	11.7603	4.84426	14.8314	63.3319	1.20121	2.85655	1.14273	7.00767	101.807	0.254539	2.17447	59.0601	1.06862	8.43887	14.5299	5.40579
TCGA-B8-A8YJ	431	0	16.8502	5.74177	189.881	7.76792	1.06611	4.8017	0.00703387	13.2847	6.63003	3.59916	90.1704	8.92024	12.3584	5.45586	0.00626602	4.78848	0.108148	103.987	12.4608	7.32838	18.1735	60.5811	3.82398	3.65942	26.632	8.4859	326.647	6.1599	1.20242	142.222	1.60595	1.175	11.7242	8.78887
TCGA-BP-4352	344	1	6.66738	4.10682	1.78104	5.44428	0.191526	2.01163	0.0148991	8.53642	5.67324	0.0483831	39.1506	1.30118	6.79112	2.14246	0.0176968	0.684542	0.286347	97.9544	7.51619	21.4611	5.36037	56.8643	2.70983	3.56229	3.99856	10.0967	107.173	0.117883	5.92826	23.9627	1.91131	7.12751	16.3089	12.411
TCGA-BP-5177	293	0	12.7722	3.33589	42.1783	5.71887	0.36712	2.74162	0	10.7892	4.08506	1.1287	34.3352	7.44894	15.8006	3.75646	0	2.62541	0.0446365	68.951	9.39696	9.63844	11.0748	65.6549	2.95665	3.16655	9.47382	6.63919	53.5837	1.13883	0.787207	124.555	1.20515	1.3664	13.9214	6.63033
TCGA-A3-3357	2688	0	4.22616	6.03093	38.7086	3.32489	0.174055	3.26429	0.0261671	4.06961	6.25643	0.3131	17.4157	5.53251	7.74386	3.99892	0.00388509	3.57744	0.0335273	32.6074	6.95805	10.7894	14.239	47.8524	3.28354	3.12259	1.23654	4.84948	73.3058	0.648354	1.10866	51.1244	1.01082	1.96757	9.93774	4.97297
TCGA-AK-3465	369	0	2.55148	3.8925	42.1033	7.94886	1.07478	3.79947	0.0150268	16.0631	4.98363	0.739474	6.30898	10.1396	8.67262	5.12265	0.00892424	3.52221	0.0962671	38.4128	12.7713	5.70789	14.0327	102.907	6.11621	1.84156	4.69603	4.17977	49.0863	3.16007	0.476111	34.4248	1.56814	3.62178	10.5989	8.22576
TCGA-BP-4804	1459	0	11.5295	4.90172	92.3259	6.74134	0.49353	3.06042	0.00800421	8.1164	4.5971	1.38562	35.7454	7.16452	10.5612	3.8783	0.0142609	5.53876	0.0307668	100.426	10.8006	9.92564	14.2159	63.3638	3.34446	2.40681	9.94497	5.41113	75.0471	0.729966	1.72807	64.7887	1.65443	2.15692	16.1887	7.43783
TCGA-B0-5701	1732	0	3.8919	8.44018	505.867	4.5128	0.687532	3.83184	0	4.4839	4.91945	0.143623	32.2212	12.5414	11.4849	2.98401	0	1.06917	0.0320292	95.9994	5.95339	8.19398	11.7945	65.7333	2.60437	3.05282	1.77194	8.79003	64.5119	0.484057	1.06833	75.7987	1.26832	1.87965	14.9107	3.75717
TCGA-BP-4976	1632	0	9.96145	5.80147	136.138	3.95439	0.103161	4.86785	0.0110424	3.88351	5.42181	0.318869	19.3496	21.7201	10.3901	4.54116	0	1.82727	0.042445	40.8786	10.6098	6.44015	18.5818	37.8891	5.24032	2.56434	2.8306	6.24441	76.7989	0.0229918	0.661768	80.0923	1.05685	2.77815	12.838	7.1417
TCGA-BP-4162	3074	0	9.09295	6.03646	599.592	4.60412	0.243378	5.03105	0	4.26551	7.25755	0.213215	35.6462	10.6226	9.23426	4.57413	0	2.32703	0	55.3437	8.64587	7.42203	9.87313	33.8675	4.5761	2.61334	1.54191	5.1384	293.979	3.30593	0.834598	65.1194	1.34691	2.07166	12.1791	8.27994
TCGA-DV-A4VX	1626	1	2.97432	5.14587	194.137	4.36462	0.119738	1.70086	0.0239119	8.23111	7.52647	0.127826	6.42112	6.56955	5.18498	2.30839	0	1.90252	0.0919133	13.0392	3.87496	22.0547	4.64939	93.1685	1.24561	2.75596	0.90611	3.08247	72.5451	0.995759	2.43146	19.47	0.937486	8.70813	15.2693	6.35886
TCGA-BP-4998	932	0	13.6233	5.56226	36.7906	7.03595	3.12571	4.96561	0	8.88057	8.55536	2.72382	29.2692	17.7624	12.2883	5.46689	0	3.22302	0.158726	80.2513	13.864	7.7628	14.4894	46.3151	4.14262	2.14833	5.55586	7.85875	117.895	0.0154763	1.80432	106.274	1.61062	2.13488	11.4398	8.19905
TCGA-CZ-5986	373	0	4.3912	7.47706	94.0868	2.97611	0.0990181	4.58571	0.00833252	4.88297	8.03357	9.21295	17.0803	37.1924	7.65775	5.23348	0.0074229	4.68746	0.160144	64.6985	7.01273	6.74696	17.4977	25.2484	4.76725	2.85426	3.28751	3.92348	154.232	0.0156145	1.07446	88.9805	1.16021	1.58498	8.07232	5.36012
TCGA-B0-4821	1230	1	7.10657	3.8839	70.0621	7.69514	2.2422	1.28881	0	9.37043	6.48681	0.147693	57.7106	2.00063	5.8982	2.79659	0	1.48651	0.166494	34.632	11.0973	23.77	3.7855	70.6146	2.03286	4.08931	3.62063	12.0571	65.0019	0.0236742	2.94426	22.0282	0.796026	7.42054	22.1116	8.27343
TCGA-CJ-5678	574	1	4.36878	3.30304	32.3148	5.95001	0.129365	2.11393	0	4.35847	4.43517	0.216191	13.7893	13.4942	4.88769	1.58276	0	3.40217	0.184816	66.9985	4.84362	5.50985	9.33573	79.7779	1.02793	4.81627	1.63518	3.5046	84.1652	0.828066	2.50022	26.9305	0.718778	2.39533	20.5714	2.84639
TCGA-B0-4815	1588	1	7.40424	5.68858	17.8514	6.48178	1.10322	2.77237	0.0158212	5.44936	6.65689	0.395213	25.4804	4.75199	8.05007	4.78521	0	6.40627	0.121628	65.3479	8.58848	15.8391	10.313	51.7862	2.45151	4.88297	6.60182	10.4752	126.506	0.0065884	3.29914	46.4656	1.91102	6.07036	17.9137	8.11358
TCGA-CZ-4858	1943	0	2.50906	7.38114	5.72885	5.38001	0.653193	5.30575	0.00643103	10.1058	4.14168	0.892554	32.5821	1.0934	7.15143	3.29096	0.011458	4.12585	0.197758	128.132	8.10984	4.67018	16.9413	45.2677	2.44013	2.40168	6.90661	4.93615	56.2826	0.0602564	2.72473	59.5356	1.52949	8.19447	14.0531	6.96608
TCGA-B0-4823	454	1	7.55505	5.14719	47.4275	3.89117	0.198234	2.90006	0.0532608	6.38148	5.84126	3.0494	30.1184	12.0392	10.9784	3.50616	0.00948932	4.00486	0	58.9839	13.1766	4.86802	15.2993	57.062	3.57269	2.42799	6.05475	6.42818	133.266	2.92767	1.13418	93.5209	1.23906	2.55875	12.2658	5.9446
TCGA-CJ-4895	1200	1	8.68644	5.93254	38.9589	5.96056	0.413546	2.9025	0.0181419	5.30818	4.37212	1.41303	48.6194	14.9336	8.47338	4.22003	0.0107743	4.46924	0.0232448	76.5699	9.95903	9.5335	18.2343	70.4846	2.95126	4.0456	8.26573	7.23615	97.2981	1.74516	2.01407	66.2691	1.29702	2.04989	12.9723	6.29484
TCGA-B0-4852	1121	1	4.90747	7.08053	336.466	4.49941	0.289763	4.1694	0.200884	4.01567	7.88393	0.817945	18.9477	26.001	10.4265	3.83133	0.00298257	2.12357	0.115824	54.1679	7.39961	6.94806	18.3662	47.1588	3.01294	3.69928	4.16881	4.05898	139.933	0.614854	2.91105	79.7472	0.845492	3.49863	14.1934	4.43243
TCGA-CJ-4635	1416	0	13.6739	6.78143	29.0058	6.72185	1.46705	3.00831	0.0225883	8.39378	5.50728	3.19481	21.1147	24.0022	8.95816	4.23039	0.00670749	5.59836	0.0868256	245.285	10.2506	5.00597	15.9342	38.6381	5.54927	2.78764	4.14886	7.75751	67.9775	0.0141096	2.84058	54.3626	1.4456	1.92799	13.7386	7.58763
TCGA-BP-4787	480	1	5.65572	4.07848	271.675	4.84067	0.365104	2.96879	0.00592135	6.05223	4.4636	1.16439	40.9022	5.84716	7.01995	3.63408	0.00527495	3.11208	0.0455213	64.3543	6.0051	6.65545	6.72928	41.994	1.97227	2.60785	5.17926	4.15454	109.449	0.0221923	1.74524	73.2349	1.22392	1.89167	12.7237	6.5505
TCGA-CZ-5455	561	1	5.89989	8.09908	266.229	4.07477	0.140756	6.3584	0	5.58886	6.49751	0.473643	19.8436	22.6987	11.7684	5.72988	0	3.67646	0.0272662	58.0004	6.29388	8.61557	15.79	40.4445	4.43181	2.98935	4.753	5.94896	116.897	2.53004	1.60463	120.95	1.42018	2.89754	11.7763	4.7344
TCGA-BP-4174	1879	0	3.41288	4.74736	17.506	4.77328	0.0885175	3.57149	0.748334	2.87752	6.70621	0.284374	18.5651	9.91737	9.41319	4.17574	0.0104983	3.24213	0.0679481	20.3934	6.52352	9.42832	14.2773	57.2807	2.23185	2.73169	2.96312	5.39247	115.686	0.0956966	3.26501	67.5125	1.17716	1.57347	11.381	7.12164
TCGA-BP-5190	1011	0	3.13808	3.50338	366.371	4.09157	0.116344	1.79903	0.00534947	5.60083	3.83597	0.440176	11.6465	9.61703	5.90713	3.03252	0	1.22592	0.1645	16.5586	4.4071	9.54656	10.88	60.9736	2.47609	2.51443	2.23936	5.35359	40.7474	0.0601471	2.16794	33.7261	0.980798	2.92222	14.9303	5.20437
TCGA-BP-5010	878	1	8.04263	3.75323	28.1525	5.81533	0.968595	2.11363	0.00682458	7.48913	4.81303	2.23496	41.4758	5.25267	9.22904	3.04721	0	2.87173	0	64.3074	10.6625	9.19061	9.1755	91.4918	2.46292	3.69994	6.06056	7.21262	73.846	2.02489	1.9662	44.554	1.00336	2.04708	14.4657	5.82662
TCGA-AK-3429	2017	0	5.81043	4.90491	56.3117	5.24947	0.134205	2.85346	0.0299278	3.64912	4.43618	0.0538269	14.062	8.31174	9.21573	2.95258	0.00666519	2.67882	0.0287594	63.4198	7.72689	7.36098	7.35528	62.7465	4.10226	4.02261	2.53166	5.10593	104.217	0.415945	1.48852	58.2061	1.07413	2.69129	14.5148	3.48037
TCGA-B0-5402	449	0	5.63037	4.14727	1388.87	3.71374	0.219209	5.23686	0.0164316	11.6582	3.82173	0.666177	29.2973	18.8935	10.834	4.42049	0.00365946	2.01858	0	147.914	8.71838	5.03004	11.428	47.1415	4.18907	3.02588	3.09312	5.48141	137.58	0.0256596	1.11692	103.204	1.2079	0.846506	12.4276	6.91857
TCGA-B0-4822	1111	1	12.2845	3.06715	20.0526	7.24482	0.350639	1.14111	0	8.78795	3.69465	0.452197	59.6313	4.37937	6.74492	2.9129	0.00657141	5.95597	0.368612	51.0611	10.0063	11.5701	6.24677	85.8307	2.79894	3.61454	4.78489	7.9159	81.8239	0.00460779	2.86992	35.9822	0.937804	3.46295	13.7554	7.28389
TCGA-BP-5169	193	0	3.00401	2.53282	361.85	5.01161	0.590755	1.52083	0.0123409	5.66579	2.24621	0.325539	60.9531	3.70994	4.02079	3.22132	0	4.22489	0.0948726	44.9214	5.54236	6.56566	5.45686	82.4594	0.657841	3.27776	8.64037	13.2976	52.7871	0.967435	3.01443	23.7886	0.704407	2.46783	20.8248	5.61529
TCGA-A3-3387	617	0	7.80122	6.22614	84.3959	5.45839	0.325285	5.5334	0.00976955	11.6204	7.27986	3.3019	32.7739	12.6424	11.0755	4.9268	0	3.92757	0.131434	94.9429	8.36507	12.8892	17.0165	52.8405	4.07885	3.06973	8.1336	6.81366	86.07	0.573632	2.0912	110.737	1.50815	4.05616	14.6949	7.14919
TCGA-B0-5812	2963	0	10.8209	8.23524	29.2383	3.99928	0.252825	5.76471	0.0147721	7.85104	6.34439	1.99633	46.221	22.2295	14.5426	3.94584	0.0131595	4.35919	0.0757087	110.421	9.53498	6.36165	17.0649	47.3055	5.07351	2.82174	6.32869	4.70009	137.42	0.012303	1.05219	116.568	1.17108	2.0654	14.1016	5.47695
TCGA-B4-5834	38	0	14.288	5.7049	780.805	4.77829	0.578669	5.12335	0.00460049	16.2072	5.82067	1.84447	53.1238	23.1685	12.9209	4.56592	0	2.66018	0	115.304	9.34748	4.95159	16.165	53.518	4.56955	2.20386	10.6567	5.23782	106.627	2.41675	0.691527	131.267	1.17768	1.92969	13.2644	6.78363
TCGA-BP-5185	1132	0	2.86726	1.76524	26.8592	4.34494	0.137789	0.496947	0	2.67612	1.38862	0.242828	8.40015	5.36102	4.21332	1.03712	0	1.39522	0	12.7639	5.76548	6.43978	4.82476	75.309	1.61718	6.05357	1.04606	5.61538	29.5686	0.0099706	1.38786	10.5399	0.262287	2.51075	18.8064	3.54607
TCGA-A3-A6NI	1018	0	10.5584	4.83604	31.7746	8.82479	0.138246	2.42209	0.1394	6.00372	5.17825	0.143039	28.561	16.8267	8.80093	3.99264	0	3.18437	0.123653	37.8741	11.4861	10.7142	15.3268	87.173	3.66749	3.36935	2.45954	10.639	90.0795	0.147358	2.94716	49.6321	1.60435	4.22979	20.1126	7.2084
TCGA-CZ-5465	1377	0	3.99081	6.58918	386.783	4.79774	0.0854011	4.20878	0	2.07655	4.36348	2.47865	21.5614	26.3407	10.0151	3.63981	0.00308465	2.74531	0.0266196	75.8892	9.30214	8.05834	8.11879	31.0098	2.04986	3.24843	1.67643	5.60344	121.947	1.01008	1.11752	66.2227	1.03015	1.08931	14.0234	6.16537
TCGA-G6-A8L8	1091	1	6.55002	3.2472	110.954	11.9265	0.407323	1.9608	0.147298	4.79984	3.64341	0.820001	28.366	23.1193	8.70965	2.11794	0.137466	1.19475	0.107845	81.2658	13.1489	15.976	12.5663	120.08	3.26056	5.92087	1.53847	11.6751	92.0645	0.0744829	1.7624	26.0477	1.54079	2.19803	24.5664	11.3148
TCGA-3Z-A93Z	385	0	12.9876	5.93607	421.536	8.69985	0.355028	2.1706	0	7.56009	5.30852	1.30019	23.6496	13.8203	8.42928	3.21459	0	2.59088	0.149361	41.0512	9.11065	8.28295	8.91583	86.7283	3.2099	4.172	6.41813	6.50987	89.2292	0.964808	1.77516	46.9605	1.319	3.39952	22.3245	6.94482
TCGA-CJ-4871	2423	0	6.55603	5.53081	50.8309	6.15748	0.385923	3.65426	0	7.02591	4.5272	8.43887	34.0262	11.8176	10.4075	3.35319	0.00460459	1.41332	0.0198682	89.1179	8.12369	5.18284	13.591	61.017	3.85399	2.08674	3.85051	3.93938	103.242	0.810399	2.22805	96.5022	1.05497	2.74162	15.7189	5.6074
TCGA-B8-A7U6	495	0	8.59794	5.48125	347.952	6.9408	0.329229	2.83057	0.0328128	11.523	6.45736	1.1508	60.1105	15.2895	11.7274	3.47684	0.0584615	0.951438	0.094595	110.933	12.4283	7.29253	17.9355	75.1982	2.97674	4.53186	7.42746	8.61715	392.983	11.0782	1.4688	81.6642	1.93677	2.96073	17.5372	8.25533
TCGA-DV-5567	910	0	10.703	6.21223	55.5961	5.61155	4.54345	5.11212	0	10.1155	6.12127	1.97801	29.6491	19.2677	12.1612	5.72513	0	1.96756	0.0370821	38.3223	13.9566	7.59068	14.9459	71.0933	6.48402	2.32005	1.99342	6.73069	240.163	4.32368	0.778375	114.893	1.07627	4.60528	11.1964	8.1213
TCGA-BP-4163	2839	0	7.20646	6.26396	34.3427	5.44409	0.212308	5.59928	0	6.18991	8.93928	3.96121	22.5493	19.8154	9.22606	4.62312	0	2.64423	0.293526	23.1119	6.63559	8.61183	15.8114	45.2703	3.56492	2.50761	3.3907	6.86443	68.0784	0.0381596	1.69928	77.6375	1.20856	1.58291	13.6925	8.53568
TCGA-CJ-4920	139	1	14.4225	5.70322	234.626	6.64697	0.5495	4.12526	0.00590551	8.14846	5.33451	0.755003	45.4337	14.56	9.64791	4.42745	0.00526083	3.92767	0.113499	102.993	10.3133	11.216	11.9097	49.2672	2.28375	2.77959	4.74679	8.32171	98.7979	3.46012	2.1322	106.99	1.24618	3.53559	11.8437	8.03048
TCGA-EU-5906	206	0	15.9434	6.98937	267.737	4.34143	0.160075	6.79692	0.041773	8.79771	6.42291	2.26759	32.3887	20.5779	14.5412	5.84813	0.00338298	3.11935	0.0437913	50.3099	9.79479	7.09419	20.2401	45.225	5.2984	2.64812	2.55978	5.30832	174.639	0.0332095	1.14446	105.672	1.29071	3.08853	9.40947	6.15513
TCGA-BP-5194	408	0	10.4725	5.49432	228.069	4.00205	0.264706	5.37682	0	6.83844	5.10578	1.27059	23.7771	22.7589	13.8055	3.55289	0	4.2566	0	111.867	8.91015	6.87685	15.6747	39.7781	4.95471	2.59829	6.92313	4.43526	90.6083	0.00493278	1.14631	136.195	0.983459	1.16993	10.6942	5.78321
TCGA-BP-4353	375	1	8.293	6.54339	1222.89	3.45844	1.66233	5.35405	0.0112847	12.008	7.76552	1.10868	61.9545	13.0013	11.5112	4.42909	0.0201056	3.79375	0.0433764	159.19	8.16282	3.28807	16.7049	40.6816	4.19209	3.06989	14.4208	4.03374	106.537	0.0387689	1.44682	138.5	1.19065	1.38286	9.59659	4.55403
TCGA-CZ-5469	946	1	3.98577	4.23378	16.2425	6.57903	0.586949	1.70827	0	7.45746	5.11637	0.157102	25.7032	7.15657	6.87159	2.24443	0	1.88714	0.0409041	45.5064	4.98574	10.1857	9.25024	96.4926	3.9144	4.2276	3.08838	8.34068	45.9527	0.00997069	1.32123	28.9983	0.883501	4.67769	16.9495	5.40275
TCGA-BP-5189	822	1	5.92485	6.18432	605.02	4.89264	0.613184	5.08363	0.00660583	5.70598	6.00199	1.4673	43.4298	20.4898	9.83843	6.66433	0	3.33117	0.0888709	121.206	7.09934	6.57228	14.1628	44.6887	3.56065	2.00334	4.83263	5.81136	149.005	0.222819	1.31178	133.441	1.1026	2.02979	12.2498	7.96578
TCGA-BP-4170	2343	1	10.1828	5.33336	319.569	5.23301	0.230424	4.19938	0.00456755	5.3533	5.49544	0.533975	24.7655	18.1668	10.1716	3.83616	0.0244136	2.55156	0.0175569	77.1695	11.0178	7.36665	11.1939	41.8258	4.62454	3.238	2.40074	5.252	170.707	0.596294	0.932261	80.3942	1.27986	1.94371	12.565	5.68462
TCGA-BP-4351	970	0	11.8701	4.59564	756.209	7.57821	1.85281	2.50667	0.0798116	15.7545	6.81357	2.35378	38.9262	11.5871	8.51919	3.79106	0.0109383	2.29787	0.0471972	40.2012	11.0339	10.4434	13.1827	79.4549	2.25222	2.39948	8.38334	6.80862	96.2114	0.471692	2.01306	38.8618	1.22119	2.85963	14.1611	14.6701
TCGA-G6-A5PC	242	1	2.76746	2.67772	20.5773	8.57379	0.121957	1.06358	0	5.78228	3.25641	0.588654	7.58777	8.5103	5.20521	1.97616	0	1.6359	0.215228	14.5688	7.2001	13.988	6.02983	205.649	1.00639	5.95388	1.19818	5.63195	64.135	0.124913	1.0845	8.36645	0.249041	2.37985	29.5888	3.66162
TCGA-AK-3455	683	1	2.66352	7.53344	256.615	4.35997	0.335316	2.70827	0	5.30632	6.2402	1.21794	9.40904	14.6893	6.68256	2.97301	0.0117899	2.46195	0.0763078	35.974	5.12412	7.96229	16.0446	49.7927	2.94025	3.82618	4.94725	5.19636	100.246	0.00826693	2.64276	49.4807	1.41356	1.34748	15.4162	5.03223
TCGA-B8-5158	293	0	6.50791	5.46549	18.2409	4.66341	0.335003	2.62283	0.0220372	6.34189	4.24	2.09934	33.919	6.57395	8.15293	7.00157	0.0039263	2.01513	0.0338829	100.863	7.95979	8.26057	10.388	46.8467	2.99441	2.30151	2.26353	7.62461	56.9419	0.00550614	3.21836	112.676	1.29979	4.47129	12.6007	6.39131
TCGA-A3-3367	2270	0	6.06374	6.7897	562.268	4.21127	0.162762	4.76481	0.00424517	5.89713	5.52349	10.2241	18.0861	21.254	8.81161	3.9599	0	7.46168	0.0489531	75.0301	10.4293	7.52176	9.5726	48.7731	1.72038	2.00357	3.08293	5.55388	77.0943	0.0132586	1.59842	63.6863	1.25928	1.21643	12.0286	6.90045
TCGA-B0-5088	563	1	11.8619	3.90329	68.0859	6.54287	0.592456	1.92731	0.0142063	7.77715	4.80551	0.420169	29.9713	8.08135	8.4799	3.20319	0	5.59847	0.0728087	26.1116	10.3403	8.48651	12.1384	84.5983	2.98834	2.94844	3.3123	5.42174	141.037	1.06486	1.00491	40.1262	1.16718	2.3385	15.6483	7.52062
TCGA-B0-5107	927	1	2.03065	3.90207	0.995925	8.95258	0.248307	1.15427	0.0118444	1.67999	5.53718	0.0781107	12.7407	13.8042	6.00427	3.4452	0.00527572	4.5029	0.204876	83.6738	6.19868	21.5789	18.4998	98.9908	1.30981	4.84659	0.221775	9.28062	50.7876	0.0332934	3.87501	15.2451	1.178	9.04093	20.3106	6.91878
TCGA-B0-5702	1605	0	6.52226	1.28595	18.3575	10.1359	0.522968	0.736641	0.167692	5.42468	1.59661	0.326738	13.2759	3.73309	3.63968	0.963634	0	1.89627	0.117197	9.33504	5.50221	2.38102	3.05952	128.7	0.767206	3.94596	0.366997	2.19771	52.0622	0.0285676	1.55015	1.88864	0.0131842	5.13043	65.83	10.9613
TCGA-B8-A54E	909	0	2.27776	5.63933	15.4571	4.00861	0.0738353	2.38199	0	12.0378	8.12642	0.0171675	7.14549	1.34542	5.32309	6.87069	0	1.2555	0.0275174	1.71279	6.38514	9.09017	8.35757	45.4421	2.15217	4.04249	0.73723	5.69908	53.6399	0.554493	1.70908	28.486	1.13299	0.960196	13.8011	1.44401
TCGA-CJ-4873	1776	0	4.9344	3.5559	9.51332	6.77243	0.304092	1.57415	0.0396567	4.50973	4.26385	0.312641	22.2832	4.52549	4.47068	2.52072	0.00706552	7.49259	0.396328	32.2891	7.48835	9.62945	9.31118	100.568	2.21109	4.51446	3.39442	8.17549	63.2602	0.039634	1.73571	18.6371	1.07005	1.81815	18.1693	7.68356
TCGA-BP-4161	2746	0	8.46257	5.92358	40.5101	6.18257	0.257859	4.38234	0.0054248	6.34451	6.32294	0.633379	21.5669	18.103	8.66137	4.63128	0	4.92713	0.020852	87.3981	11.1454	9.41989	11.436	55.0539	3.83288	3.09124	2.0097	6.98506	108.373	0.0982681	2.24644	68.8095	1.15881	1.66689	11.413	7.86809
TCGA-BP-4775	1843	0	14.9864	5.53037	381.262	5.91103	0.254038	5.10997	0.0105397	5.29454	5.49917	0.0924117	18.5671	21.9757	10.1356	4.51094	0.0140837	3.21258	0.0405128	24.2515	12.9308	7.08941	20.6623	46.3746	5.9742	3.63408	2.29061	6.18919	177.718	0.0592518	1.53769	67.7673	1.58147	9.31087	11.5541	8.06421
TCGA-B2-4101	188	0	12.6104	5.54072	434.023	6.07694	0.781858	5.06695	0.0246439	8.86505	6.16368	1.61873	40.5026	13.843	10.5661	5.0441	0.0054884	4.97784	0.0473634	93.2885	10.2153	10.1575	13.9228	50.6957	3.94913	2.70545	8.9814	4.98955	79.5493	0.377143	1.86126	89.6807	1.44927	1.57758	12.1241	9.10828
TCGA-A3-A8OV	340	0	7.40211	5.29632	137.729	8.34202	0.153634	2.0239	0	3.97431	5.32778	5.55885	10.3149	10.4506	7.82387	2.85402	0	4.08396	0.0516439	15.2991	10.8795	7.01805	20.3437	65.0023	3.63433	3.52091	1.60822	8.89118	36.0144	0.239183	1.49488	33.6924	1.52215	3.50584	17.4443	7.97539
TCGA-BP-4977	454	0	7.01749	6.52494	35.5523	5.92122	1.11575	3.86344	0.107999	6.4369	5.34672	0.85479	18.4732	11.126	8.13857	3.57863	0	3.72619	0.127732	55.5701	8.72836	8.6633	18.784	66.8161	2.63506	2.06209	1.82217	4.53305	68.2017	0.350277	1.22428	63.307	1.51957	2.72491	12.2084	6.24238
TCGA-BP-5198	603	0	5.40453	5.38781	636.612	4.86737	1.02824	4.39933	0.00493114	12.0957	5.24151	0.755337	91.2543	10.6576	6.92257	4.38741	0	2.49495	0.0189544	132.882	10.6341	9.277	17.1136	42.0446	2.61225	2.96551	10.2355	5.77925	143.812	1.27828	1.96571	114.352	0.94248	3.23484	15.9238	5.06939
TCGA-B8-5546	505	0	3.44429	5.45766	130.449	5.53063	0.11586	4.5152	0.014556	5.91307	4.84083	3.53537	2.5534	11.3888	11.7011	7.98763	0	1.96556	0.111902	4.25531	10.8814	17.0578	12.2908	74.243	4.22178	2.19313	1.18752	6.40987	37.2953	0.0227308	1.50157	32.8439	1.14556	1.37553	13.3682	6.75304
TCGA-B0-5695	1420	0	12.8646	6.46047	265.975	5.28816	0.362968	3.57644	0	5.38801	4.26275	6.37437	26.828	20.6104	12.1466	3.90669	0	4.83	0	57.2569	8.82673	7.59165	14.6275	83.7506	3.48016	2.54601	4.10578	5.1494	130.278	0.0906398	1.11933	73.9845	1.23925	1.2883	16.1297	6.58938
TCGA-B0-4691	139	1	4.14676	4.14947	8.51988	4.84378	0.878515	1.27998	0.0631042	4.84287	5.18691	0.304377	27.6782	8.61837	7.57574	2.28266	0.020442	1.89325	0.220511	102.418	5.41319	10.9631	13.2215	76.9114	1.8462	4.13335	3.85158	5.71575	91.985	0.100336	1.78805	46.805	1.19568	3.19673	19.6675	4.92463
TCGA-BP-4766	1462	0	13.1131	5.84064	118.765	6.93755	0.246073	5.25529	0.0225822	6.06042	6.87968	0.445414	25.0796	22.0025	13.4441	6.74364	0	3.42136	0.121523	31.4212	12.8197	9.99926	19.5027	46.4337	5.81991	2.94294	3.00207	8.61093	110.907	0.394961	1.50421	81.8404	1.20304	4.38361	10.8069	8.29825
TCGA-BP-5176	1590	1	8.02383	4.14283	143.841	5.88593	0.244761	2.43389	0	8.29987	3.77542	9.13538	20.8508	10.4897	9.71641	3.83661	0.00392126	1.28744	0.0169197	40.0131	10.4867	11.5379	17.2623	82.2409	3.15088	4.40722	4.93334	7.33544	63.7012	0.0192468	1.12222	56.7832	1.26005	2.35622	16.6298	5.09054
TCGA-BP-4340	562	1	5.83339	4.03386	102.81	6.29047	0.264182	4.88335	0.0363941	2.83856	7.18712	0.0838665	13.9998	21.081	5.9601	3.09674	0.0162106	1.22351	0.0699463	12.7653	7.30415	8.30098	9.57912	53.6164	3.37695	3.07858	1.58191	4.98252	121.535	0.335316	1.26374	45.1663	1.10949	2.44626	13.807	9.16259
TCGA-B0-4833	2386	1	6.0606	5.42245	127.651	8.17124	0.465934	1.95381	0.0523885	6.74083	6.07671	2.48908	14.5815	15.2867	8.23378	2.87834	0.0388913	1.81993	0.201372	30.3694	6.67043	12.4425	10.8844	60.4239	2.92559	4.2671	3.60838	6.3882	84.1515	0.0490861	1.50548	31.4894	1.07227	3.71564	19.3979	7.7182
TCGA-BP-5001	1177	0	6.69141	3.54831	93.1334	5.91939	0.491472	1.46825	0.034429	4.22651	4.56057	0.270051	11.0088	4.97626	8.33079	3.24275	0.0511176	1.9966	0.242622	13.2097	8.73134	14.2015	9.63419	79.8492	2.85359	5.36471	2.59393	6.10114	68.3567	0.207889	1.01475	14.5382	0.664983	2.34391	18.3419	10.7887
TCGA-B0-5119	59	0	11.1237	6.54114	294.57	4.65495	0.234877	4.57036	0	5.94999	3.83174	3.01259	18.6209	22.7303	12.3962	4.67169	0	2.29891	0.146804	60.68	10.5293	7.43256	15.1295	58.4731	5.88179	2.76828	5.85221	6.86958	90.8669	0.12269	0.783946	85.9462	1.09943	3.03365	12.1544	6.4505
TCGA-CJ-4916	1373	0	7.22449	4.80409	205.912	6.56358	0.433268	2.5477	0.00451492	3.55302	5.20903	0.495341	14.9398	11.3238	6.67719	3.35762	0.00402205	4.08301	0.1909	57.0929	7.83169	8.11689	12.8219	59.5657	3.61455	3.26174	2.75349	7.0797	108.547	0.0112808	1.31408	42.5582	1.12454	1.42585	15.7747	6.53973
TCGA-B0-5099	485	1	10.2406	6.47036	45.9544	5.28089	0.278128	3.35112	0	5.37347	6.36072	0.500618	21.6295	16.732	10.9087	3.74297	0	1.99904	0.0874883	38.949	12.842	11.2715	9.19153	62.7886	4.96238	3.98622	3.99534	7.9147	202.203	0.0213259	2.25571	51.845	0.875949	2.87937	10.7487	7.85479
TCGA-B0-5084	222	1	4.32986	2.5199	9.36581	3.54868	0.903472	2.09115	0	19.6411	3.66329	0.141256	8.46015	14.6621	7.01843	2.57811	0.0171343	1.67042	0.0924149	78.2381	5.08554	19.7148	12.31	36.4533	1.55065	5.0745	0.733131	13.5683	101.735	0.732873	4.358	37.0366	0.989732	7.07097	15.2242	11.0505
TCGA-B0-4693	77	1	7.72053	5.96951	79.5082	5.01258	0.255	4.88476	0.034674	3.91721	7.74616	0.454212	31.6987	14.665	10.6796	4.53025	0.0123555	3.12405	0.0799687	33.8578	12.4673	9.08382	12.7635	64.1063	4.16045	2.62554	2.9401	6.17584	159.626	0.0303224	1.24681	67.8788	1.31344	1.38676	11.7612	7.27578
TCGA-B2-4098	51	1	2.55827	2.41156	2.27851	4.96898	0.169297	3.1755	0.449829	8.18523	7.58844	0.292556	5.50366	3.01929	6.33319	3.29128	0.0143116	3.98768	0.0926286	6.12592	4.71777	16.5447	8.83378	53.2793	2.68614	2.90154	0.902419	7.695	58.5718	0	3.37372	47.7712	1.3616	0.940275	10.1905	9.64227
TCGA-AS-3777	1238	0	1.76748	1.91643	16.3459	2.10933	0.679822	2.76676	0.213398	7.48122	2.2173	0.110611	8.29656	3.04296	3.48741	5.11101	0.728724	0.747303	0.0512665	14.6688	9.31271	1.93626	6.11146	53.849	2.13729	2.75378	1.56377	2.35366	37.6573	0.833107	1.72309	25.8211	0.972751	6.10394	21.4214	4.7693
TCGA-B0-5095	245	1	18.811	6.10517	29.0176	6.00533	1.14164	3.96146	0.0181416	8.88947	7.32932	2.6103	65.9299	12.7904	12.8556	4.76365	0	3.43913	0.116222	93.2796	11.3296	8.74866	15.1507	52.1738	3.33963	2.85018	22.2169	6.97719	109.846	1.4165	1.66203	157.612	1.61079	3.14852	12.3481	8.13853
TCGA-B0-5115	797	0	14.9561	5.68445	31.6584	6.17749	0.47795	3.9442	0.0211057	8.76738	5.99847	5.33729	33.1084	19.2991	11.3787	4.24549	0	4.39028	0.0811265	54.0114	8.815	7.87254	18.144	65.5908	4.0425	2.77227	5.05972	6.86149	124.29	3.22336	1.24412	95.9251	1.3644	1.57626	13.8296	9.02416
TCGA-CJ-5681	552	1	5.68078	9.0224	13.6372	2.9163	0.300578	5.23148	0	3.43278	6.27213	2.81881	6.6165	6.81961	14.5075	8.86886	0	2.07889	0.0213817	9.15812	8.68321	16.8169	11.4224	48.3227	3.03148	2.23853	2.5592	5.78035	49.9601	0.243224	2.21333	51.3294	1.35662	7.52199	16.6124	7.60845
TCGA-BP-4331	2454	1	8.21136	6.23283	66.5061	7.89168	0.320201	3.68867	0.389944	5.16038	7.2949	0.568507	24.3171	15.5366	10.4127	4.73665	1.09626	3.66323	0.0389319	35.6941	11.3489	10.9635	18.7901	61.3629	5.22129	3.29662	4.95782	9.11211	115.373	0.262555	2.0486	76.3978	2.06722	4.4645	16.8515	9.96069
TCGA-CJ-5683	1889	0	8.15098	4.77795	349.408	5.68333	0.297256	3.00168	0.214824	7.50681	5.17111	1.13428	22.6142	13.7935	8.86468	4.65727	0.3226	2.05313	0.0235928	62.1408	10.2373	7.25499	16.6696	73.7497	2.90196	3.46989	3.31639	8.50112	90.3033	0.414066	0.954271	46.5434	1.06695	3.21815	17.6075	6.19537
TCGA-CZ-4864	1315	1	7.74218	8.20001	131.438	6.07501	0.187796	3.34821	0.01282	3.2034	6.5509	1.76198	15.7636	26.9369	8.62428	4.19603	0	4.75765	0.180686	20.0298	8.6033	7.33172	13.621	46.0614	4.7964	3.07621	2.7319	6.3014	112.153	0.0133465	2.62608	65.1982	1.80352	2.03215	13.2342	7.51503
TCGA-B4-5838	166	0	5.18533	6.45136	250.274	3.60199	0.102633	4.2033	0	5.1218	6.36857	1.63152	20.1731	15.3425	13.184	4.73897	0	1.89724	0	37.9703	6.38317	9.74924	15.3826	56.2855	2.98543	2.50725	11.6318	5.95135	63.923	0.0430848	2.11612	100.479	0.677866	5.34443	7.86358	4.86138
TCGA-B0-5710	1459	0	22.6094	6.3041	343.049	4.99758	1.09963	6.15238	0	8.77911	6.46007	3.37961	82.7142	17.9973	15.0691	5.62007	0	2.5796	0.0653813	189.732	7.06154	6.22825	15.9027	60.8883	4.37393	2.74897	11.1242	4.85401	92.515	2.02934	1.09875	164.147	1.25528	1.39651	10.8341	6.88374
TCGA-CZ-5987	445	1	1.63879	6.65722	222.628	4.76919	0.220904	1.6836	0	3.22369	3.18855	1.67546	16.084	14.7488	6.12471	3.26849	0	2.6381	0.0728287	86.6256	5.71421	9.41415	13.788	49.3507	2.45908	3.04379	1.1403	6.21795	137.686	0	2.855	48.5956	1.17159	3.53471	13.9045	5.4649
TCGA-A3-3349	1385	0	25.6081	5.84276	53.1248	6.38431	0.727479	3.93807	0.0191232	8.85891	5.97881	3.93336	48.0141	15.1805	15.6068	5.07598	0	6.58252	0.0490043	67.5195	10.3757	7.44741	16.3085	56.9981	5.67306	2.26561	11.6541	7.10694	73.7641	0.0238903	1.35272	117.34	1.26795	2.12968	11.515	10.477
TCGA-BP-4959	2660	0	8.40985	5.45821	102.651	4.61649	0.17398	3.52034	0	3.96189	3.49827	3.00215	18.6751	13.3299	8.92106	5.05062	0.00367686	3.44351	0.0634605	27.9126	8.98442	8.92184	13.368	50.3045	3.38633	2.35196	2.36813	5.98064	80.5788	0.345474	1.07965	62.9594	1.93826	2.27479	13.7995	4.80724
TCGA-B0-5699	2741	0	9.53036	6.29683	131.824	5.44598	0.162053	4.35081	0.00527563	7.46315	5.24454	0.260144	19.3844	25.8061	9.41797	3.94592	0	4.24183	0.0608359	66.3416	10.3067	14.2218	19.2819	61.6484	1.331	2.21817	2.34957	4.51655	79.4195	0.204314	1.20507	60.5504	1.48739	1.64679	11.7525	6.30671
TCGA-B0-5121	554	0	8.23691	3.69333	118.857	4.68874	0.165609	2.53999	0.00464542	8.07148	3.50963	1.71139	30.5655	10.0993	8.7737	3.12944	0	2.30874	0.0535686	52.7622	7.30484	5.78467	10.1568	69.6849	2.40245	2.83257	3.71531	4.85013	57.2562	0.0116069	1.01319	64.1623	0.859749	1.77294	13.3037	3.96229
TCGA-CJ-6027	1855	0	3.93266	8.50416	18.908	4.50309	0.605594	2.05	0.00519416	4.47207	3.6917	0.139351	19.2189	7.22414	6.69195	3.01512	0	3.39345	0.0199655	129.151	5.84282	11.4311	10.9964	32.7165	2.00522	5.11697	2.44527	7.75379	87.0967	0	3.04269	58.5472	1.4195	2.71071	14.6104	3.88154
TCGA-CZ-4861	446	1	3.41164	5.88415	16.879	4.52071	0.168837	5.71246	0.00492167	6.31945	6.07322	0.508246	15.6474	14.0509	7.64491	3.07756	0	3.86623	0.0189181	44.7721	7.19422	8.92478	16.4865	41.4281	3.15475	2.70947	2.42231	4.73173	189.155	0.344319	1.90028	93.759	1.0939	2.0404	11.1552	3.99667
TCGA-AK-3426	885	1	4.15331	3.09197	44.1222	5.94808	1.33126	1.35299	1.25439	5.30059	3.8651	0.435898	16.7224	7.07019	4.49666	3.44214	3.25303	9.10573	0.285727	31.4291	9.20722	8.98807	7.72447	88.1959	2.40576	3.7572	9.2457	6.63815	83.1355	0.0580402	3.30004	23.9851	0.948228	7.455	21.9964	5.81908
TCGA-DV-5576	727	1	8.55471	5.56187	61.3497	6.24838	4.06035	3.29598	0	8.1953	6.25957	2.74002	28.6795	14.9676	10.2617	5.29241	0	1.57274	0.0601633	24.981	13.0202	8.99805	14.7229	62.4757	5.5968	2.52286	4.60532	7.95263	132.533	4.49409	0.66507	96.501	1.14608	1.41229	11.8189	8.24583
TCGA-B8-A54I	150	0	7.2223	2.71735	84.9069	7.92158	0.489671	1.68575	0.276733	5.67179	4.21664	0.195052	37.0132	4.45516	5.69588	3.22087	0.273174	5.02045	0.258741	54.6566	6.86315	9.33821	4.84481	57.4158	1.45608	2.45604	1.72051	8.70676	76.9142	1.60712	1.88478	35.2179	1.31954	2.09754	21.0017	6.12079
TCGA-CW-5580	1964	1	5.92195	7.4627	412.047	3.77571	0.226799	5.57406	0	7.69912	6.4927	2.18351	48.7891	19.5348	10.0118	4.67867	0.00359006	1.89449	0.0464718	66.4573	7.16132	9.08013	14.5418	39.9863	4.83815	2.67268	4.10164	4.84209	181.206	3.05097	2.00142	110.467	1.02119	1.71004	8.81124	6.44893
TCGA-BP-4342	2256	1	10.5255	5.13996	294.88	9.21049	0.555864	2.55387	0.0235215	9.11027	4.62492	0.604253	37.2572	10.6824	9.64551	3.37998	0.00838151	3.31855	0.0180825	103.172	12.5979	8.04448	10.3162	51.8963	2.56996	2.77761	9.73946	6.66839	91.7127	0.261527	1.79209	80.8211	1.33445	2.08795	8.52656	9.06302
TCGA-CZ-5989	1599	0	3.71125	19.8962	96.8726	0.415533	0.159261	13.0212	0	3.32597	11.5923	9.71081	6.52516	43.6829	15.2988	2.4197	0	1.36087	0.176148	110.578	0.730927	1.40193	12.4808	3.07988	3.90444	1.71631	14.9035	0.454707	157.551	0.472313	1.64331	171.444	0.0990803	0.325953	1.40937	0.528207
TCGA-A3-3347	1610	1	8.42019	7.31472	456.108	5.56126	0.675894	4.3486	0.0127463	7.85014	5.79732	1.24368	29.804	6.63589	7.70704	4.52447	0	5.30284	0.0244974	97.4737	8.77399	11.0126	12.3849	41.5892	3.90368	3.58241	12.3763	7.96788	115.82	0.00796189	2.16486	110.425	1.69761	3.13173	11.3348	7.9773
TCGA-B0-5697	1835	0	6.97012	4.84471	14.487	5.33031	0.134502	3.15101	0.827113	9.3268	5.92265	0.590548	17.6373	12.464	6.34659	5.50957	0	4.03344	0.0349372	27.261	9.22765	21.6586	16.1391	72.8688	2.81072	3.20123	1.55597	9.8385	105.852	1.20362	2.0929	72.5161	1.6468	2.40496	19.8672	7.07658
TCGA-CJ-5684	2231	0	13.6574	4.65663	56.1249	4.85783	0.229267	3.30145	0	6.04486	3.97229	0.341231	24.4736	13.9982	9.85682	3.79723	0	2.9818	0.0217152	60.7733	10.4066	6.77361	11.5361	64.1836	3.7484	2.72087	5.34937	6.57099	57.4691	0.275249	0.890818	56.5561	1.22144	2.85184	14.4986	5.99691
TCGA-CJ-5672	1972	1	9.84128	3.54365	66.2009	6.52158	0.396939	2.3722	0	4.16504	4.36345	4.37812	22.3264	10.109	8.06742	4.56986	0	4.08051	0.0618632	55.8519	9.81772	12.09	13.2088	69.5534	2.56308	2.54405	3.36862	8.39377	65.0318	0.191009	1.01986	54.149	1.5589	2.3549	18.9131	6.3823
TCGA-BP-4975	1433	0	9.21694	5.85612	79.5154	4.17759	0.210303	5.03613	0.027286	5.45519	5.49937	15.1081	23.5683	17.8152	10.7376	3.80773	0.00607684	4.77578	0.0917725	54.8074	8.93986	6.06584	19.1664	53.2172	4.35447	2.27518	4.27424	4.35482	87.5757	1.23143	1.89243	92.5506	0.917369	1.6677	12.186	5.87267
TCGA-B0-4706	65	1	11.4214	5.19506	100.545	9.92657	0.53905	2.07456	0.0476599	11.4248	5.47008	1.42071	15.7375	14.5827	9.04541	3.20866	0.0188698	5.59306	0.142486	43.0974	8.97005	15.0925	12.0535	96.8134	2.09345	2.78914	11.0485	5.31265	59.4234	0.129005	2.04464	57.8832	1.04419	2.44722	14.2077	8.83018
TCGA-BP-4334	645	1	1.52802	1.53207	2.87281	9.12184	2.06872	1.36241	0.00877048	21.9061	2.82972	0.0801855	4.41945	14.3633	5.34493	2.43843	0.0468783	8.0445	0.101137	18.3084	10.8058	13.7314	2.95509	209.765	2.45664	1.77321	0.668601	4.30231	28.2985	1.98318	0.413597	4.57777	0.849521	3.64671	33.6457	5.63944
TCGA-A3-3376	1696	1	26.9599	6.80822	47.2859	6.32777	1.1233	6.1289	0.0109707	8.1033	6.67764	3.81363	50.1257	14.236	16.6665	6.93003	0.00651536	5.49332	0.0140564	96.8218	12.9446	7.3301	19.735	60.7461	6.34924	2.24158	15.9342	5.89078	68.096	0.00456848	0.956564	143.776	1.39787	1.97978	10.5659	10.5205
TCGA-CZ-4863	1691	0	7.574	7.12184	91.9643	5.88174	0.115406	4.95308	0	4.18058	7.33562	1.05336	21.0136	11.7432	12.1173	4.26183	0	3.24247	0.0369809	41.9905	7.63927	7.63578	16.2198	39.8598	4.30026	3.50619	5.5007	5.70641	129.009	0.0150239	1.60567	90.8728	1.67241	2.15265	13.2273	6.1123
TCGA-BP-5004	1126	0	5.85175	4.82225	677.223	5.18543	0.148925	6.71862	0.00383936	7.31344	7.72589	0.361954	41.1227	23.5165	8.60967	3.85886	0.00342024	1.99634	0.0885472	94.6289	6.39426	8.76294	10.1767	45.7695	5.33896	3.63398	5.59699	10.0327	170.788	0.0143894	1.6974	114.887	1.01605	1.90068	10.2822	6.96574
TCGA-CZ-5985	1629	0	3.98542	7.49294	148.112	3.07043	0.130849	4.5172	0.11093	3.61849	7.5097	1.14576	13.7719	14.5587	9.06636	4.71516	0	3.34557	0.0370781	52.6018	6.7204	4.27854	14.417	32.6824	3.69836	3.18312	1.27719	6.24585	98.4767	0.271142	2.02569	78.2111	1.09701	2.08773	10.2173	5.48111
TCGA-B8-4146	511	0	2.14365	18.8044	943.042	0.804016	0.0460086	11.2806	0.00621817	1.8916	12.3263	0.0587146	4.63614	24.0584	14.3459	2.09055	0	0.783921	0.0478031	99.7988	1.84474	1.51987	14.1586	8.6543	4.03933	1.80169	3.11862	1.44407	237.429	0.908886	2.86363	97.4592	0.134442	1.1828	2.6723	0.892493
TCGA-B2-5641	324	0	12.3056	6.20704	30.9309	4.70331	0.145185	4.25869	0.0414419	3.28383	5.44285	0.512432	23.1903	12.3964	7.55644	5.45049	0.0276884	5.09394	0	56.1602	7.88662	6.78797	12.6109	44.9205	4.13003	2.20474	2.57035	8.04649	62.9256	0.0647158	1.27107	69.053	1.64866	1.31382	10.8419	8.03938
TCGA-B0-5081	362	1	11.9609	4.46701	136.131	6.83185	0.946246	2.59151	0	6.93958	4.73116	0.389202	40.283	7.24468	8.44826	3.98859	0.00388788	5.36511	0.184532	48.3359	8.57402	11.8763	15.8763	58.0211	2.61831	2.43635	7.38955	7.34171	94.3787	0.0163568	3.18686	64.1352	1.58525	3.85281	15.8789	6.93481
TCGA-A3-A6NL	689	0	24.9619	4.9838	86.3952	7.54798	0.685638	3.56488	0.188597	11.6487	6.28346	0.489622	54.6986	11.299	11.3391	4.96158	0	4.2118	0	50.4006	11.8827	11.3941	14.8312	67.9765	3.88037	3.00116	5.69328	8.56351	116.358	1.93958	1.45418	107.854	1.89318	2.29963	13.7538	8.43097
TCGA-BP-4992	501	0	6.18795	4.06282	105.7	7.26972	0.698261	1.15683	0	4.61186	4.90438	1.09625	9.44312	8.7888	5.99894	4.07452	0.0497383	2.40191	0.548458	9.36018	13.3564	10.228	6.32136	67.2722	3.66433	5.8359	3.0367	11.5715	91.1903	3.39071	1.78275	9.03376	0.981828	1.24056	13.4509	8.68115
TCGA-B0-4842	1724	1	3.58418	2.59351	8.26233	6.19447	0.27796	0.804078	0	3.20032	3.07851	1.55878	26.7318	8.19644	3.48532	2.27142	0	3.96806	0.142671	27.9012	8.41743	11.5068	7.99418	142.048	1.1945	3.37454	3.57416	5.17189	36.335	0.00927394	1.64643	48.5275	0.487921	4.74305	21.8451	3.08032
TCGA-CJ-4636	1924	0	10.5714	5.74311	24.3007	4.96484	0.359197	3.1729	0.0286076	5.43688	6.96781	1.51142	29.1621	5.8264	9.27142	3.78053	0.0700829	4.60035	0.247416	72.2472	6.79351	8.17692	14.1492	58.1411	2.94098	2.80444	5.87299	5.60206	60.4292	0.482477	1.77066	61.9859	1.0453	3.01732	12.2335	7.26214
TCGA-CJ-4878	2186	0	7.69144	7.23085	302.191	7.44845	0.149444	5.2697	0	14.4886	7.00456	0.32955	20.006	38.3751	12.4737	4.73852	0.0204746	0.669651	0.441725	27.4661	11.2511	11.203	22.3819	62.2504	2.89675	5.55445	2.57181	13.1667	163.257	3.12972	1.9532	52.9099	1.19925	1.56939	12.5746	7.74353
TCGA-B0-5712	2722	0	4.67415	6.13326	412.783	6.02584	0.125871	3.30599	0	3.71758	3.93282	0.294886	8.90767	19.6226	8.06227	3.02575	0	0.870158	0.0403342	27.2396	5.39972	14.9382	21.2261	65.0088	2.89402	2.79039	2.3998	8.63234	70.7547	0.694778	1.04767	37.1853	1.21604	4.54855	15.8216	4.45205
TCGA-B0-4816	1371	1	9.62617	5.88712	110.59	8.07531	1.16809	3.00625	0.0174822	10.3726	6.3197	6.36453	38.5327	18.1994	9.57273	4.54133	0.00778688	4.92465	0.100798	91.6765	11.6193	6.7437	20.5165	70.8564	3.4353	3.01674	3.56562	6.44905	108.442	0.120121	1.54257	68.4055	1.61776	1.65737	14.1613	6.88956
TCGA-B8-A54G	53	0	5.91191	6.60175	36.265	7.67695	0.310536	3.12729	0.0222192	4.88394	5.01694	0.814792	10.3908	17.417	5.07784	4.17432	0.0197937	9.59866	0	65.6645	7.50104	15.6078	20.405	61.7545	2.71213	3.75786	1.15894	7.0732	99.7467	0.351603	2.00285	51.9438	2.15219	3.57624	17.1286	5.95141
TCGA-B0-4834	2090	1	5.0944	3.8229	9.82345	3.75542	0.804059	7.37401	0.0167315	9.70082	8.92647	0.589313	11.1807	3.85955	10.069	5.02963	0	4.70616	0.0214377	24.6608	7.36095	4.88172	9.89624	85.1012	4.35048	2.23722	2.60321	4.12984	38.3695	0.442434	0.460264	42.8696	0.945373	1.58451	9.85814	5.9371
TCGA-B0-5083	1045	1	3.97701	3.41877	77.7825	5.35446	0.104651	2.73091	0	11.0862	4.03528	1.3554	10.1914	7.05443	7.992	4.38014	0	5.88063	0.024918	38.4114	13.971	5.27659	7.45703	95.1379	5.12545	1.55274	8.82605	3.69353	49.1387	0.00404931	0.630519	54.5196	1.36235	1.51766	15.3935	3.76805
TCGA-B0-5117	535	0	3.19167	2.04515	5.95716	8.0409	1.19666	1.84784	0	12.7352	3.01046	0.674998	5.94825	11.6064	7.01119	3.26308	0	4.45081	0.0239103	47.4248	11.8974	5.54163	9.0179	116.553	3.21699	1.89047	2.93674	3.81655	20.6744	2.52561	0.389596	16.8624	1.46326	3.30698	18.6752	5.48495
TCGA-B0-4694	106	1	8.19654	4.40086	84.2012	2.95725	0.663974	2.69469	0.0153969	5.49478	3.87748	2.32076	24.2348	13.328	6.51537	3.20023	0	5.66508	0.0197277	76.3466	9.2717	6.11973	10.9617	41.2291	2.7596	2.15129	5.18237	5.77008	74.5204	0.00320585	1.45974	75.932	1.27388	1.80856	13.7261	4.55364
TCGA-CZ-5456	1558	0	4.97192	6.0637	51.3053	5.20244	0.290576	4.45538	0	5.2762	5.09781	0.127666	28.8035	7.44905	6.98329	4.13757	0.00465525	3.08027	0.0200867	121.011	8.61313	10.0013	5.45272	42.6989	2.33229	1.53432	2.76764	4.45324	121.903	0.620198	1.55176	95.8975	1.57726	5.7602	9.80151	7.29825
TCGA-B0-5097	665	0	9.35769	6.29271	294.84	3.98543	0.310673	5.80604	0.0115468	7.38072	5.90027	0.709556	103.799	4.45279	10.2296	4.77911	0.0360019	3.24781	0.0887675	75.5491	7.84723	10.7852	10.494	39.9933	2.70288	3.36422	17.2266	8.39402	267.429	7.66337	2.39079	166.571	1.32315	2.53429	9.11155	5.85444
TCGA-BP-5187	406	0	8.13466	6.11722	300.949	4.0525	0.245243	3.97344	0.0827237	10.3896	6.3814	7.57554	24.6279	22.6689	14.0263	4.01842	0.0327525	1.51928	0.211984	114.279	8.68819	5.14817	21.1387	49.2058	3.76144	3.10116	8.42067	4.95204	142.252	0.522468	1.52386	105.667	0.914151	1.21042	9.02724	6.16999
TCGA-BP-4354	1034	1	7.03498	7.16538	85.3284	3.73573	0.362651	4.70598	0.198365	5.67648	8.02263	0.0526007	80.5893	10.5899	8.35697	4.68235	0.00679655	3.50108	0.0879784	127.942	9.15586	13.6081	16.4321	51.8747	2.9302	5.19245	10.7854	8.77644	163.682	0.00476565	4.09258	159.741	1.71553	4.06533	13.6246	5.80397
TCGA-BP-5008	1071	0	11.818	5.82403	24.2048	5.39022	0.269679	4.29068	0.016822	8.58907	6.63339	2.52128	26.6563	18.5972	12.5391	4.79242	0	2.93134	0.193983	54.677	11.898	5.41349	17.467	51.9683	4.07697	3.21422	4.75274	6.32139	342.748	0.0971966	1.36037	102.746	1.45483	3.58442	10.645	6.52667
TCGA-A3-3329	1624	0	10.9971	5.45846	535.896	6.14792	0.199451	3.39686	0.0117822	5.87838	5.38121	0.329343	15.6399	22.3004	9.01468	3.62886	0.010496	2.96415	0.0452888	63.9638	9.69213	7.39145	13.1976	64.7512	1.76325	3.15213	5.94069	4.53042	133.821	0.754365	1.11125	82.2439	0.754034	2.13342	9.4976	6.21471
TCGA-B0-5400	1132	0	2.64819	3.2641	80.5005	6.80376	0.215475	1.23071	0.0163811	9.15458	4.23372	2.41182	29.0369	4.38314	5.02183	2.53434	0.00486429	2.30074	0.0209888	26.9082	6.37369	12.169	7.90711	88.3582	1.20767	3.47365	5.37489	6.01264	67.5601	0.402472	2.82847	45.795	1.29864	2.66321	22.6642	4.80127
TCGA-CZ-5467	73	1	8.984	6.58755	196.253	4.51323	0.260791	4.43569	0	10.6135	7.39243	0.627878	63.9057	29.3616	10.8464	4.2613	0.00429942	3.17744	0.0556542	78.6216	10.5888	4.28823	9.93013	58.5829	4.0364	2.83409	3.58241	5.56375	134.476	0.238161	1.00285	117.476	1.34818	0.617911	16.7161	7.35498
TCGA-BP-4986	785	0	13.6353	5.05787	34.0344	5.293	0.679508	4.35216	0.00426848	7.00761	6.45152	1.12981	43.3806	12.13	10.8973	4.35788	0.00380251	4.67571	0.0328146	106	8.16752	5.99205	16.7187	47.0197	5.0312	2.82261	7.47849	7.0251	139.302	0.589246	1.17316	128.571	1.25512	1.61867	12.0169	8.22691
TCGA-BP-4790	1111	1	12.5027	7.18435	41.8603	7.02639	0.472851	5.71445	0.0265274	7.92948	6.92044	2.58733	30.402	20.2193	11.761	4.6196	0.0827103	7.27941	0.229425	97.7807	12.318	8.53051	14.4404	52.3775	3.64933	1.42195	6.66993	5.55037	104.402	0.0331402	1.07994	99.9292	1.0037	2.43402	9.93502	8.23011
TCGA-DV-5569	355	0	8.42911	4.86244	12.1545	5.03266	0.100788	3.40153	0.00535142	2.79644	5.57299	1.01301	45.0831	12.1519	10.6598	4.43656	0	2.54568	0	30.6045	11.6092	6.04011	15.6908	49.0808	3.73497	3.57662	3.33521	8.33346	183.82	0.200563	1.17506	75.8616	1.2033	4.09781	14.403	5.06674
TCGA-A3-3385	1993	0	2.9108	7.35442	1075.96	3.76806	0.115781	3.77759	0.0274187	1.92461	4.78023	0.284241	6.95049	18.8635	9.30273	4.54581	0	2.24811	0.0878274	37.1772	8.77154	10.5702	16.7916	30.7318	4.39985	2.63051	1.5096	5.29505	80.003	0.0570896	1.10445	41.0475	0.663954	2.95322	8.47138	6.90891
TCGA-BP-4164	992	1	14.8897	7.70531	502.86	6.08466	0.142603	4.05095	0.0254405	5.13304	7.73545	0.0368592	11.0911	19.6315	10.2927	4.4314	0.0226633	1.8911	0.195578	50.2984	8.51433	8.12299	16.6524	33.5805	3.13903	3.15602	3.02821	8.97487	96.7818	0.201289	0.956029	59.2937	1.25411	2.59539	14.2688	7.32856
TCGA-B4-5377	365	0	8.22636	8.07246	594.457	5.41275	0.126829	4.42233	0	5.02959	4.4961	13.8853	10.8992	25.641	11.6064	4.50256	0	1.53718	0.0155308	59.041	9.00166	8.91302	19.3756	47.0959	4.13366	3.78268	1.90213	5.77905	160.884	0.699101	1.13728	89.5572	1.1671	2.34016	12.7238	6.55104
TCGA-CJ-4882	1883	0	12.4989	3.31846	13.4971	8.26966	0.537844	2.37244	0.238291	10.7079	5.18923	3.10839	40.3961	4.69662	7.46916	4.16871	0.183974	4.02775	0.305317	59.0791	10.6898	11.9374	13.1093	105.228	2.19331	2.58787	7.81868	8.44938	111.438	4.35128	2.27672	71.7504	1.2571	4.12591	13.2204	7.43984
TCGA-CJ-4874	2283	0	6.78762	6.15744	331.594	4.96576	0.243262	4.2083	0	6.5423	4.99691	0.169053	19.9081	16.3989	10.5784	3.1408	0.0143542	1.70636	0	75.212	9.91451	9.27084	18.0182	46.5444	3.95141	2.93267	4.79132	4.15957	89.6919	0.010065	1.00128	77.2583	0.942952	2.21361	13.054	3.10869
TCGA-BP-4759	2372	0	6.20809	2.75294	312.614	5.69634	0.275393	2.36537	0.0202183	6.49638	2.73012	0.44091	37.8344	11.8663	11.1989	2.62095	0.0135084	1.96266	0.0582867	140.052	11.2196	7.12177	8.1112	68.2722	1.62332	2.81193	7.84171	4.73764	57.8522	0.00315729	1.05029	74.1403	0.878644	1.62093	19.9919	4.67471
TCGA-BP-5191	967	0	2.38648	1.85286	138.441	3.55956	0.204205	0.857167	0	2.99931	2.27544	0.0630021	14.9178	3.92058	4.46134	1.82528	0	3.60784	0.146887	29.0238	6.04283	5.83623	4.59322	67.3948	1.56044	3.53084	1.72915	4.68482	40.6594	0.011935	1.6566	11.4281	0.363534	1.33574	16.3298	2.93467
TCGA-B0-4838	834	1	9.02704	6.6718	555.664	7.30432	0.211271	3.67284	0.030201	6.59832	8.11158	1.24932	18.3423	20.9023	9.44406	5.0076	0.0215233	3.06963	0.046435	52.9467	8.59802	10.1664	15.4928	57.5937	4.16771	2.76132	3.30403	7.93795	122.122	0.939468	1.26399	71.3804	1.36863	2.2537	13.6244	8.90157
TCGA-B0-5109	587	1	6.71817	3.51347	88.1998	4.57226	0.681313	2.76729	1.43872	10.1153	5.72223	1.34586	29.9623	4.36065	7.55989	4.08548	0.0662928	3.14806	0.095348	59.4551	6.37047	10.3938	12.9263	59.8199	1.67953	5.92554	4.76068	17.3308	131.46	1.37127	3.52303	54.6009	0.820563	7.14567	17.4811	6.39566
TCGA-B0-4698	42	1	10.3889	4.15779	9.63033	10.0555	0.696067	5.03843	0.0138799	11.2337	8.25504	0.0305114	27.6391	1.64509	12.2237	3.67024	0.0123647	1.56059	0.017784	90.2752	13.3261	12.6797	28.9431	57.5455	1.6452	8.41273	58.7777	17.5328	384.908	2.06346	7.57844	118.52	2.06866	24.7264	24.725	7.57132
TCGA-BP-4777	1731	0	5.03286	4.8431	93.1817	4.78268	0.162903	2.54267	0.0209079	4.46781	4.78781	2.99657	15.7611	10.4666	9.39031	4.06223	0.00465637	5.20433	0.0803664	39.7177	9.68998	5.19919	15.9996	64.4372	3.53044	3.17708	3.48835	5.20528	134.837	3.15071	1.76012	59.4134	1.23409	3.90692	13.1924	4.40239
TCGA-A3-3365	873	0	9.17189	8.13309	120.218	4.27206	0.518339	3.7898	0.00635111	9.19397	7.83443	4.67574	29.0562	18.2886	13.8303	3.93142	0.0113156	3.7543	0.0244126	92.0554	9.85329	4.97176	21.052	67.0011	4.60513	3.57819	13.3782	3.95609	126.368	1.75746	1.46009	129.042	1.20838	1.83536	10.3857	6.71044
TCGA-A3-3311	1191	1	8.30435	7.66552	46.4075	4.97128	0.179943	5.5822	0.0196945	4.35554	6.10683	0.45384	21.9543	17.4775	10.1565	4.73164	0.0131584	2.94083	0.113554	58.9996	7.49596	10.5198	13.0868	41.0078	3.62224	2.8437	3.1542	6.95507	100.771	0.775027	2.41258	80.8743	1.27744	1.74103	10.6635	6.01833
TCGA-A3-3313	735	1	6.36208	4.71047	7.66489	4.55752	0.212631	4.50959	0.0618483	6.69154	4.01577	8.56298	7.50485	5.76051	11.0598	4.42088	0.00459138	1.42948	0.0792447	7.17911	7.24215	9.58932	11.5631	25.5547	1.80201	5.36947	2.04725	11.1148	76.5451	0.347697	1.26463	61.4863	0.922677	2.44467	9.73588	6.75116
TCGA-A3-3325	1170	1	8.60156	5.19702	240.414	6.94468	0.663077	2.8907	0.0340359	6.65086	5.18086	0.553207	26.0299	18.6493	10.2225	3.17906	0.0404272	4.11713	0.174438	68.8587	12.0466	10.0912	20.1899	55.0127	3.28303	3.34814	6.14525	8.28944	108.063	0.382684	1.3682	74.9219	1.61241	3.56449	11.2619	8.34744
TCGA-B0-5700	1082	0	7.12544	3.55795	54.1666	6.93544	0.111455	1.28967	0	4.7586	3.13321	1.65911	27.9602	9.46221	7.38862	3.01007	0	1.8998	0.0285185	49.2204	9.54274	7.71945	10.7257	69.7647	2.15678	3.85517	2.0044	6.41384	183.077	3.96706	0.74896	30.0196	1.28329	3.70007	19.6174	6.97169
TCGA-DV-5565	1329	0	15.9436	4.33782	52.6211	6.19104	0.296318	3.06165	0.0059264	7.07126	3.32115	1.51979	84.6146	4.44102	11.118	4.0685	0	2.95534	0.0683402	105.174	11.1794	4.42676	10.2403	74.1316	3.30431	6.95257	9.21014	10.2902	114.106	0.429418	0.786028	68.6785	1.0302	0.93219	23.5841	4.87762
TCGA-BP-4338	2859	0	2.61089	2.61488	21.5998	3.02512	0.0461776	1.56445	0.0435671	3.1464	5.90763	0.0385853	89.532	0.600846	7.29214	2.26417	0.0105848	2.50768	0.106568	154.557	8.71341	17.302	5.81938	35.3191	1.67326	2.16001	0.874015	4.27938	48.9765	0.210289	1.05061	79.8171	1.61674	3.78622	11.6023	3.3217
TCGA-B0-4707	600	1	6.20145	3.19073	134.405	4.97167	1.12773	1.31562	0.0608084	5.16631	2.76974	0.518193	15.8788	8.4916	5.38276	2.77835	0.108341	1.22657	0	51.9598	7.88106	15.2402	6.13026	48.2059	2.12836	3.99365	5.3327	4.59897	47.287	0.406966	1.20337	41.0633	1.58519	5.33851	10.7569	6.77056
TCGA-CJ-4870	1498	0	9.09897	4.36187	97.6361	5.42266	0.0893205	3.31986	0.494947	8.09938	3.87449	3.51553	31.4897	17.655	10.8436	2.803	1.0539	1.64703	0.0232011	62.6707	10.4288	6.65037	17.1167	75.1888	2.91374	3.64159	3.05952	6.01088	111.348	1.87007	1.04517	89.8191	1.26848	1.61181	16.9342	4.60169
TCGA-B4-5832	155	0	1.32732	23.0732	1418.97	0.45719	0.0948237	8.41566	0	4.25686	9.72297	0.338484	4.22808	8.37592	14.3388	1.28659	0	0.483405	0.162562	275.406	0.915845	1.99558	9.59171	2.85045	2.49803	1.35065	17.998	0.686675	136.25	0.914032	3.73947	175.537	0.0877806	0.17533	1.29382	0.4039
TCGA-B8-5545	522	0	15.6786	6.84451	18.8115	5.53353	1.40185	5.35019	0.0325075	7.70151	7.13404	0.873751	59.9246	17.1784	10.4313	6.04987	0	4.90267	0	66.5714	12.8498	8.93244	17.5168	50.3649	4.22626	2.40707	9.95608	6.41907	109.351	0.0270741	1.48907	149.716	1.50876	3.10495	11.0631	6.18687
TCGA-B0-5696	1727	0	7.19139	4.6194	87.1519	6.33752	0.117646	2.47699	0	6.21424	4.66376	1.30725	29.0727	12.1038	8.45967	2.76122	0.00881936	1.74457	0.0380543	65.2305	8.6853	8.91319	13.9445	74.7166	2.26171	3.95538	4.40251	4.98796	57.921	0.572022	1.01763	68.9379	1.41272	2.89114	17.6375	5.61864
TCGA-BP-4765	2184	0	7.66777	6.94792	266.385	5.43849	0.456721	4.71509	0.00934398	9.13198	8.10708	1.32905	24.692	18.9151	11.4812	4.5957	0.00832394	1.92929	0.0359166	43.5592	10.9222	6.01837	18.1009	54.2554	4.5756	3.20675	9.47886	5.76747	232.197	0.41732	2.33403	95.9576	1.30912	2.2673	12.5914	7.20061
TCGA-BP-5175	932	0	2.59528	1.90181	33.1786	4.42718	0.917806	0.918391	0	4.39289	2.09343	0.582926	19.7775	2.53239	3.99805	2.46514	0	1.19079	0.0402416	22.0696	5.44745	7.93115	5.72247	51.4227	1.45236	3.69064	2.78634	6.36153	36.093	0.0555855	1.36154	16.162	0.81034	2.09991	20.4624	4.45045
TCGA-A3-3346	137	1	1.33157	4.43726	31.6346	6.69249	0.642299	1.22341	0.0217432	10.8786	3.06458	1.80215	29.5915	1.37223	5.3421	4.01234	0.0145272	1.16651	0.0208943	70.5302	11.6169	6.21487	8.3283	64.9355	2.1453	2.05101	6.99371	6.72643	46.9388	0.00679086	5.12682	37.6678	1.7441	6.8468	11.6606	7.08147
TCGA-CW-6088	3222	0	19.3872	8.86608	106.599	5.03152	0.230148	6.92889	0.00442443	7.88568	7.64761	20.8549	29.4643	35.6584	10.866	6.76338	0	3.34423	0.119047	73.9543	9.19903	6.37172	21.6141	40.7191	6.35763	2.46992	6.50907	6.34569	74.0476	0.0221095	0.974772	128.863	1.44255	2.76218	9.4212	7.63624
TCGA-BP-4173	1893	0	10.5025	4.61387	16.2296	6.72242	0.358893	3.98476	0.00513036	4.65969	6.07941	2.45521	25.2898	9.60103	9.08456	5.24426	0.0091406	6.15448	0.0197202	59.463	11.3569	10.4918	16.0429	60.734	2.81291	2.35859	4.15118	8.21639	235.018	0.416603	1.22859	75.5385	1.96555	3.76589	14.188	7.14959
TCGA-AK-3427	2566	0	0.677804	2.31379	14.0895	3.53622	0.304312	3.23147	0.00565516	8.10911	8.60709	0.031361	2.97492	1.40734	5.56898	0.864473	0.0201513	2.29409	0.0217375	20.5702	4.58317	5.10475	15.4095	223.729	3.04448	3.59392	1.35384	2.20649	14.6732	0.0494543	0.887563	21.1473	1.1151	4.62002	21.4062	2.60888
TCGA-BP-4160	2881	0	3.413	6.22848	77.6166	3.81472	0.172784	4.54661	0	4.96726	6.95572	2.87776	22.3753	13.3198	10.8566	4.00766	0.0578971	2.64793	0.0356883	48.4261	10.1267	4.28903	20.3529	47.6875	4.73402	4.14287	3.15402	3.34849	237.233	0.0115991	1.38194	95.4654	1.07597	2.17364	11.2377	3.06781
TCGA-B0-4824	1657	1	9.59772	6.5459	65.1715	6.22381	0.682905	3.25492	0.0831353	4.13745	4.6024	2.10466	12.4084	12.0432	9.94525	4.09022	0.0875253	3.34116	0.40671	34.1926	9.26205	11.5189	14.9952	60.008	4.10879	3.12417	4.31608	7.99864	71.3202	0.783668	1.58713	40.8562	1.45104	3.26227	14.9646	8.55781
TCGA-BP-4789	1489	0	19.8477	6.13097	46.7808	5.75812	0.366671	5.91123	0	12.1	5.75379	5.49071	47.5961	27.7089	15.1287	4.37505	0.00442808	2.55675	0.0382131	87.8907	10.5305	6.19208	17.843	53.9962	6.97802	2.55724	6.94045	5.91123	138.538	2.6516	0.820429	151.242	1.00593	2.03042	10.9525	6.65701
TCGA-CZ-5457	1547	0	6.67248	4.53075	178.093	4.44529	0.15304	2.81712	0.00423951	7.40839	5.12045	2.18774	18.1917	20.4458	10.8591	3.74642	0	2.32792	0.0162959	33.4283	8.31609	4.16496	11.5832	68.5316	4.25872	3.58142	4.27519	5.48389	71.672	0.135057	1.09022	70.3173	0.912951	1.38023	13.85	4.46541
TCGA-B0-5096	68	1	2.80824	7.04311	18.5101	3.15276	0.12937	3.97111	0	3.51369	7.12595	0.156625	35.0014	3.31853	8.54169	4.1542	0	2.59714	0.0492861	348.838	9.27493	9.04818	17.7255	38.2172	3.77831	2.84417	2.76093	6.38445	193.199	0.00400462	3.08473	253.535	1.8186	2.90802	9.68989	5.94158
TCGA-BP-4801	1124	0	13.5906	5.20081	31.4728	4.5899	0.23219	3.17161	0	5.63696	4.42236	6.85067	25.1787	17.1351	10.5503	4.87925	0.00470675	7.39805	0.020309	80.5081	9.43076	7.75601	15.3408	51.3892	4.21589	2.36437	4.96762	5.73732	77.6864	0.0990094	1.44435	99.7994	1.45763	1.87474	12.0331	4.95026
TCGA-B0-5116	657	0	8.09944	5.48397	25.9758	3.64983	0.237336	4.13997	0	6.9077	4.71383	0.773426	55.7993	18.0139	8.80415	3.2802	0	1.80599	0.0406879	172.366	8.28494	5.79643	10.976	41.4834	1.92057	2.58313	3.85069	5.08316	91.6229	0.013224	1.11535	87.0429	1.19466	2.51686	11.0322	4.58405
TCGA-CJ-4897	1808	0	10.1158	5.33419	169.804	4.66039	0.221247	4.52803	0	4.82577	5.1603	1.02178	20.8888	19.651	9.71396	3.72665	0	2.28018	0.0415288	54.9026	9.47288	7.49236	10.7327	54.7449	4.63833	2.35594	4.21445	3.38085	61.9244	0.0269946	0.639522	74.0847	1.0683	2.67866	12.9675	6.54575
TCGA-B0-4817	1019	1	5.66838	4.89016	26.2841	6.32589	1.7199	1.73404	0.0676837	3.54623	6.05645	0.580485	9.69345	5.65348	4.72007	2.00565	0.0267978	1.29783	0.0578143	21.2429	9.39518	12.1184	9.69383	65.4387	1.86248	2.91504	0.553188	2.71964	56.5117	0.169112	2.44928	20.4283	0.858515	1.62307	14.7994	5.13697
TCGA-AK-3436	2044	0	4.46964	2.40163	264.64	3.24152	2.2308	1.84323	0.00590821	9.5893	3.46315	0.132828	24.6287	5.45543	6.42439	1.99527	0	1.81411	0.136261	114.747	5.32297	3.3984	10.9078	63.3429	3.51717	1.70808	5.02553	3.15696	51.5296	0.191907	1.45404	61.4991	0.786882	2.39176	19.409	4.83509
TCGA-CJ-4637	2227	1	11.9303	6.22999	24.0652	6.53729	0.458615	4.11434	0.229394	3.96403	7.48893	0.395388	16.6961	9.59564	7.33776	4.17226	0.0113529	5.84819	0.0489863	147.672	8.79513	13.2236	16.3804	43.8432	3.64984	5.84657	5.42861	8.72835	120.703	0.0119408	2.52602	61.2965	1.80203	3.30989	15.9201	7.05085
TCGA-CJ-4881	2014	0	7.86516	4.3492	10.4499	7.38702	0.518252	2.20254	0.0118839	6.48729	5.63593	0.345544	37.6076	5.36356	9.72725	3.44321	0.0105866	4.35809	0.0913594	29.5924	6.61738	11.8712	5.71531	81.5965	2.24276	3.88713	6.20653	5.25656	94.0058	0.193003	2.97285	66.1495	1.15109	4.69492	15.2278	6.91084
TCGA-BP-5192	714	0	10.6089	4.28313	119.567	5.41709	0.119869	3.70537	0	7.34628	4.54742	0.420497	17.9802	18.7063	11.8672	3.7162	0	1.52692	0.0181857	33.6578	9.91175	8.48552	15.084	65.4871	5.69244	2.84829	2.29057	5.94524	81.2718	2.62723	1.32821	64.2604	1.11702	2.19216	13.4286	7.4411
TCGA-BP-4803	204	0	9.17215	6.17414	143.874	4.13138	2.04372	3.55994	0	5.51961	5.63131	2.13158	36.4202	19.0198	10.154	5.0171	0.0137861	3.4742	0.0594851	116.041	8.40079	4.00165	12.5706	47.2995	3.98631	1.93641	3.22187	3.94925	79.3597	0.00966663	1.528	90.6672	1.04393	1.27057	9.65039	7.59085
TCGA-CW-5588	2017	0	9.71732	4.80631	81.0103	4.11722	0.784688	4.3376	0.0115503	5.24172	4.82164	1.7173	55.95	7.4182	9.18865	3.88466	0.00514469	4.34899	0.0221986	94.9939	8.29017	7.60565	12.3677	41.8319	4.54314	1.66589	7.94778	4.27927	59.2281	0.375168	1.57023	115.011	1.29858	1.58441	9.78037	7.28738
TCGA-A3-3359	2504	0	10.2081	6.70641	690.168	6.05048	0.347065	4.46727	0.00710054	5.55244	6.87878	1.46651	22.8063	19.05	11.3716	4.91032	0	3.59656	0.136466	49.4469	11.6101	9.66611	15.9186	50.2054	5.98546	2.98546	2.60202	5.80288	133.144	0.0221765	1.15104	63.5597	1.22816	1.6883	10.4561	7.89006
TCGA-B8-5549	194	0	12.6048	5.48443	157.791	3.19795	0.676537	5.35201	0	3.59051	5.75423	0.198853	37.8057	18.9199	8.47058	4.41973	0.00498698	2.1392	0.0215181	63.2394	9.26823	4.08116	11.815	43.9421	4.52249	2.76106	3.87079	6.1395	112.894	0.342687	1.00235	97.9759	1.14258	3.35155	12.9398	6.16831
TCGA-BP-4769	1876	0	16.114	5.313	81.7145	9.75777	4.34002	4.44242	0	14.1931	6.37608	12.235	23.7908	7.78223	12.9034	4.69695	0	3.85251	0.0678245	78.7913	12.2047	12.5529	14.4816	68.927	5.74475	2.52979	10.3599	6.3174	97.9476	8.59336	0.970787	115.963	1.38358	0.767377	11.6459	7.56872
TCGA-CJ-4907	1499	0	13.576	5.01001	96.4121	6.18844	0.586039	5.06275	0.00445273	7.54553	5.11471	0.404428	39.1227	20.2436	11.2321	5.156	0.00396664	4.23135	0.0513465	74.1409	11.1827	7.44199	14.8212	44.4603	4.44047	2.43124	7.70005	5.04767	63.1575	1.71054	1.06959	133.082	1.22843	1.61252	13.3573	6.84557
TCGA-B0-5713	1865	0	8.63037	6.44145	314.247	4.79806	0.284474	4.41612	0	5.81902	6.42098	1.75303	25.7389	15.2374	12.103	4.69319	0.00457594	1.50526	0.0592336	103.661	8.5914	10.8174	16.2848	46.8539	4.42185	3.23135	3.92959	5.49446	119.729	0.660969	0.946231	88.14	1.30162	2.17338	13.9747	5.56123
TCGA-BP-4158	3377	0	7.47249	7.02883	234.605	5.28503	0.336389	2.40472	0.00617409	8.48449	6.0308	2.51516	21.9196	15.9498	10.6146	3.61194	0	2.48039	0.0711964	79.8418	9.22246	8.07571	15.9269	53.6348	4.13335	2.8106	5.44987	5.76874	79.7446	0.755893	1.20557	82.2793	1.27616	2.96615	12.4123	7.22997
TCGA-B0-4843	320	1	18.7441	3.62963	5.19863	6.32915	0.607535	2.23365	0.00756878	12.8589	5.19724	1.81051	64.8974	3.51095	11.7668	3.69591	0.0134851	2.97284	0.0581862	58.0271	9.83847	5.93569	7.65675	67.0063	2.02481	3.67454	12.6128	8.68435	73.739	0.704439	1.57829	54.22	0.79858	3.12859	12.8455	6.77564
TCGA-BP-4330	1888	0	12.7377	5.70507	212.342	6.11547	0.402451	4.77071	0.0195102	5.88049	6.15268	0.345785	22.0809	20.5379	11.2411	4.69351	0	5.63532	0.0562455	50.6361	12.0096	7.48919	8.9294	50.3488	5.19357	2.36799	7.51491	6.6404	88.9739	0.00304673	1.15727	83.8151	1.67466	2.08753	13.0152	8.68736
TCGA-BP-4991	1413	0	19.7446	7.7019	121.911	5.36482	0.867229	6.08133	0.00391484	10.0996	6.63122	11.129	45.9616	25.0762	15.8328	5.453	0.0139499	4.5669	0.120384	74.1268	11.3422	6.48574	16.5791	42.3415	6.21643	2.71983	9.68623	5.37404	169.162	3.2768	1.86346	143.198	1.4423	2.09557	9.72862	8.1792
TCGA-CJ-5680	768	1	7.76187	6.16425	60.1119	5.95692	0.155852	3.1841	0	4.07083	6.07961	7.086	17.276	18.2605	11.5108	6.28409	0	3.274	0.0417478	34.9018	8.62103	13.8064	19.9941	88.491	3.91962	2.64692	3.2465	8.56081	72.1917	0.101763	1.23244	67.9995	1.1976	1.85405	14.4313	8.74521
TCGA-B0-4841	204	1	4.74523	3.10963	42.5986	4.56178	0.399086	1.27341	0.237324	6.52293	3.30737	0.436542	24.7327	7.93339	6.90954	1.4996	0.221027	1.54734	0	62.5399	6.38292	4.68298	6.92614	95.4019	2.00012	3.81327	4.54463	3.28544	58.322	0.229102	0.580252	31.9594	0.550433	0.854981	18.6749	3.46079
TCGA-B0-5711	2931	0	12.1391	6.45657	52.7648	4.46837	0.287752	5.02022	0	5.17631	5.31228	3.75485	34.7804	22.0916	12.3046	4.27507	0	3.41419	0.0203847	91.284	6.58612	7.9676	15.8912	41.0227	4.54766	2.84099	6.16352	4.7463	71.7884	0.129192	1.40284	138.45	1.2154	1.66834	10.6744	5.60909
TCGA-BP-4993	177	0	12.6502	4.76116	134.395	5.98589	0.274784	3.97257	0.00578086	8.81439	5.52463	4.01852	45.6902	18.9276	13.2908	4.17386	0	2.17017	0.0444412	64.7205	10.015	5.00272	13.243	70.3063	3.70549	3.21969	8.57418	8.02376	133.165	0.238324	0.898771	101.926	1.41985	0.923394	15.6571	6.60449
TCGA-A3-3335	1886	0	5.8252	4.85029	297.78	4.86383	0.120608	2.22173	0.0202987	4.54913	2.95742	4.022	15.1711	10.402	6.74313	2.44223	0	1.92213	0.0585185	52.8114	5.49194	6.78613	12.2504	58.1805	2.238	2.94074	1.2488	5.83262	70.3032	1.44228	2.26971	48.4657	0.864584	2.00483	14.7301	5.68349
TCGA-BP-4987	1124	0	18.0208	6.62492	91.7237	5.86786	0.337104	4.70512	0	6.02497	4.082	0.764176	20.9497	25.9762	14.6449	4.58422	0.00422512	4.64793	0.0364617	75.4154	11.4109	7.66062	13.1752	52.7236	6.03634	2.14991	9.09621	6.46872	74.2475	0.124429	0.866699	93.7052	1.34539	1.307	12.2527	8.63492
TCGA-CZ-5466	685	0	6.45155	3.62245	52.2047	5.93028	0.323468	2.64976	0.242693	3.15377	4.43841	0.454685	15.5514	10.874	13.9827	3.90991	0.618571	6.72738	0.0518262	57.0021	11.4746	9.83579	9.15177	63.8143	2.46864	2.74333	1.92045	7.48965	90.0762	0.109486	1.71375	51.5521	1.41675	2.21944	16.5156	6.65852
TCGA-CW-5584	164	1	11.3525	7.07932	91.7652	6.70577	0.175718	4.81035	0.00522471	6.13976	4.96886	0.66405	40.4085	23.7076	11.1152	5.80254	0.00465435	2.87768	0.0602487	82.8893	8.46434	8.40927	16.2698	75.8856	2.14848	2.25058	5.24074	7.02305	75.023	0.153388	1.83635	101.211	1.59051	2.18514	12.1401	7.65531
TCGA-B0-5120	493	0	11.6394	5.63127	105.6	5.08915	0.702684	3.18815	0.0164947	8.85547	5.78625	5.82207	28.2371	19.9835	12.1098	3.83133	0.00979602	5.12013	0.0634027	88.3098	12.9891	5.71287	18.6287	54.0951	4.69667	2.65516	7.1255	5.72158	118.57	0.604458	1.61243	85.2569	1.40274	6.97906	12.522	6.53207
TCGA-B0-5399	652	0	11.2666	5.37628	24.1302	5.87117	0.410846	3.0074	0.00531126	6.8296	5.23062	6.10969	26.2286	16.9438	9.14421	4.18525	0.00473146	5.66918	0.224571	71.1936	9.70536	11.7339	16.6693	64.9623	1.85699	2.8111	6.10893	7.0218	58.9693	0.122753	1.92156	64.5325	1.39179	2.31201	14.469	7.35797
TCGA-BP-5186	693	0	11.8785	6.99197	33.0586	5.28631	0.381412	4.4338	0	5.83997	5.42337	7.43716	16.2989	19.5716	12.6832	4.25094	0	3.20068	0.0201814	38.5801	12.3432	10.1129	19.5963	57.4269	5.83039	2.34275	6.85338	6.36	90.5717	2.43016	0.885924	70.0967	1.35312	2.29189	13.2896	7.69573
TCGA-CZ-4862	1843	0	13.0199	8.24347	51.0881	6.98406	2.19425	5.87118	0.0145414	6.10164	8.31789	0.632045	23.7893	20.9483	7.47479	6.66495	0.0518161	3.99237	0.0558948	47.5715	13.266	9.0641	20.0015	54.9269	4.68455	2.22371	4.54112	7.19761	119.495	0.0181664	2.44832	85.9074	1.91154	4.07811	11.6335	6.79216
TCGA-B0-4690	43	1	7.65943	5.47678	12.7856	3.99562	0.543485	3.5992	0.0211699	6.11074	7.19013	0.352196	36.9377	5.321	7.63201	4.32239	0.00942945	4.08635	0.0610301	93.1092	11.1891	7.12484	15.4273	26.4119	2.35859	3.52359	11.0067	9.08277	103.852	0.0165295	3.20167	145.382	1.75761	4.5754	15.523	6.59265
TCGA-EU-5905	119	0	6.72035	3.95596	345.41	4.42752	2.60319	4.47802	0	11.5821	4.08772	0.582632	34.1839	9.14628	6.69621	3.30375	0	1.57442	0	90.1	8.01538	7.96753	8.14292	40.8199	3.56154	3.01357	3.61971	7.50639	80.0744	0.565321	0.870101	97.6934	1.31196	1.77617	14.074	6.29449
TCGA-BP-4343	1912	1	3.28451	7.46872	106.884	2.84564	0.393637	7.03271	0.0247272	6.03769	7.47155	0.748632	24.9624	8.45008	10.459	2.23245	0.0991252	4.61366	0	120.411	8.61025	4.82172	10.9893	35.0023	3.5163	3.93258	12.7488	1.9831	96.1427	0.2201	1.06132	176.377	1.22963	1.06281	9.5685	1.87973
TCGA-AK-3445	1280	0	7.29806	5.44306	203.545	5.51184	4.08962	2.17765	0.00685193	6.50465	4.78891	0.652122	37.2206	7.05527	10.9369	3.04734	0.0305197	3.72018	0.0790129	82.1985	7.25984	10.7115	8.25079	45.6134	3.95192	2.50151	5.03099	7.47414	65.6881	1.13848	2.93335	68.6192	1.10219	2.65683	13.1262	7.12677
TCGA-AK-3456	1143	0	2.93211	7.37742	6.35925	5.22628	0.120728	4.62742	0.0207096	6.23123	6.43688	4.35587	6.17569	12.457	9.71096	7.89439	0	2.51414	0.079604	16.0053	9.17902	7.75249	17.4923	55.2681	3.5198	1.85794	1.63415	3.12479	65.4517	0.116425	1.52088	64.3938	0.865666	0.65655	10.6013	6.6591
TCGA-BP-4967	205	0	10.502	5.57489	426.102	5.90112	3.22933	3.36713	0.0124593	7.96012	6.90674	0.542788	27.6807	15.2136	6.17435	4.14907	0	1.60331	0	98.4861	11.6021	5.88493	14.4134	45.0954	4.32316	2.02697	2.9383	7.20912	68.6161	0.869054	1.71982	63.8168	1.88925	4.22845	9.24172	7.99767
TCGA-BP-5000	563	0	5.74852	3.94334	38.5631	5.04936	0.543394	1.61998	0	4.55278	2.82819	1.65357	26.1649	10.3142	8.68318	2.38597	0	2.47214	0.0734967	60.7796	6.44629	7.67123	10.3539	77.5001	2.36768	2.98553	3.17099	5.04727	72.3815	0.791263	1.25392	45.3473	0.806142	2.49466	17.7982	5.48616
TCGA-BP-4341	1589	1	11.0899	5.41713	263.417	7.57821	0.493649	2.62844	0.0113197	7.56306	5.67671	1.41157	23.7736	12.7464	8.92105	3.10158	0.0806722	1.38585	0.1958	49.8371	8.79481	12.237	9.40115	90.8169	3.72538	3.29079	2.55097	6.65838	100.039	0.017677	1.2553	43.261	1.00344	1.5873	16.2639	11.5796
TCGA-DV-A4W0	2008	0	10.2476	6.70779	53.0801	6.97989	4.22205	4.27215	0	7.68182	7.90924	0.614944	15.0263	27.3764	12.5965	5.06668	0.00503446	1.54526	0	25.9566	13.5441	8.91737	20.268	63.1387	6.37307	2.90743	5.97107	8.41966	103.303	0.162385	1.09935	126.656	1.62755	4.66518	11.6702	7.12504
TCGA-CZ-4853	774	0	6.28062	5.63186	75.6235	4.59483	0.109323	3.39258	0	3.21817	3.13047	2.63796	11.4214	26.9873	9.42813	2.95895	0	3.42717	0	44.3775	8.35245	9.17852	14.2781	45.2741	3.43343	2.30737	0.917185	3.69407	47.8897	0.00742839	0.867507	48.6571	1.11762	3.44632	14.8366	5.78755
TCGA-B0-4828	307	1	5.29427	6.4474	167.205	6.45534	0.273362	2.26404	0.0388281	9.63775	5.35864	0.430646	7.78866	17.2352	7.53171	3.22293	0.055343	3.31122	0.119399	33.7337	8.3808	11.9713	11.4417	72.5738	0.930748	3.6101	2.3576	7.28252	83.2587	0.936191	1.81961	21.6898	0.873076	2.31988	18.0725	8.1453
TCGA-CJ-5671	1943	0	19.8587	3.60339	47.8743	6.39808	0.675917	2.9514	0.0113974	5.38505	4.61824	0.59105	77.762	7.39716	8.1621	4.47475	0	8.3753	0	78.2445	10.8699	8.79569	12.3341	63.0105	2.70188	2.04746	8.75717	7.44427	78.9084	1.08925	1.97355	100.139	1.5426	2.08459	12.7918	7.24566
TCGA-BP-4776	411	0	7.66029	4.50613	79.8777	6.42725	0.365715	1.91242	0.833473	12.1596	4.5606	1.77038	28.7601	11.6689	8.96481	2.27503	0.638698	1.95337	0.103346	65.8879	9.94649	7.5908	13.5993	88.9903	3.13937	3.86624	3.36809	6.10718	168.187	2.34	1.29431	36.9399	1.0541	2.76473	21.6729	7.1498
TCGA-BP-4798	334	1	7.57838	4.36016	98.9513	7.31956	1.87226	3.24963	0.0165353	7.24516	7.22503	2.78975	19.3595	13.1086	7.4537	5.38013	0	5.7504	0.127118	56.5937	10.0296	7.5319	9.41147	47.4018	2.79575	2.62266	9.50933	5.30991	102.356	0.00688577	2.39211	65.7262	1.6207	2.59419	11.9373	9.6551
TCGA-AK-3440	1745	0	3.49291	3.06881	43.1017	4.59854	0.0429705	3.45533	0.0207189	8.53581	4.39891	0.0799624	4.69435	6.04497	4.56125	3.21544	0.00461427	1.20153	0	18.806	12.612	3.15534	6.30481	119.784	5.85144	2.61807	0.6304	3.39463	85.4693	1.98334	0.32823	15.8427	1.43347	1.78738	18.1351	6.08828
TCGA-B8-4154	255	0	4.3701	4.36287	250.63	3.59976	0.130354	2.63133	0	3.20114	4.62182	0.531997	9.78625	9.37742	10.6921	1.85071	0.00454312	2.05739	0	70.842	5.94171	5.82113	16.4385	45.7688	3.87008	4.07835	3.68315	2.5293	57.8007	0.00955673	1.30019	57.523	0.630705	1.5857	10.4879	3.14626
TCGA-A3-3343	945	0	6.33951	5.63557	882.478	6.09435	0.234011	3.53378	0.0108155	5.96461	5.60196	0.57141	29.1381	23.8663	8.83471	3.3747	0	3.5148	0	123.237	10.8916	8.77787	11.6735	46.3295	4.20757	2.30505	2.28545	5.7711	144.553	0.162139	1.09179	71.0753	1.23	0.989079	11.4494	7.38329
TCGA-B0-5693	3076	0	14.866	6.56713	285.997	5.30121	0.211654	4.59002	0.024519	9.65524	6.85985	4.16549	41.0109	28.7222	12.7996	4.30689	0	1.62797	0.0471234	68.4615	9.96239	6.71034	16.9877	62.1375	5.33354	3.78106	3.76291	7.47957	144.28	0.313969	0.989147	90.6672	1.55856	4.57422	15.4486	6.8214
TCGA-G6-A8L7	2133	0	2.43275	3.31131	209.182	8.57443	0.309783	0.817723	0.172705	6.20997	3.18965	0.0293363	16.8719	7.45429	4.82014	2.72848	0.246162	0.53545	0.177026	55.0941	9.29335	4.47124	6.74427	87.9487	0.747166	9.65971	1.1857	4.00512	30.2197	0.999676	6.68519	14.2932	0.298722	10.6697	28.9476	5.39371
TCGA-B8-5553	435	0	11.0898	6.29102	449.1	5.58991	0.116603	5.20493	0.0165974	10.3389	6.46945	1.15259	28.9968	30.0186	11.7871	6.34357	0	2.36831	0.0425316	64.2435	9.98702	6.8527	15.0932	60.1813	4.25698	1.77756	2.53794	8.60449	145.306	0.0380138	0.990601	92.6052	1.52631	2.42853	13.9701	7.70084
TCGA-CZ-5984	1491	0	7.16892	5.62091	86.0857	4.38293	0.958087	3.90754	0	3.97153	4.62207	0.598726	25.3451	12.6656	7.22638	4.43767	0	2.40205	0.0891696	39.4728	6.23264	7.05817	11.9988	53.5749	3.62221	2.62888	1.35272	6.84608	77.6717	0.0028981	2.09564	64.2164	1.11949	4.67855	12.8703	6.71272
TCGA-6D-AA2E	362	0	3.63014	5.11191	75.5936	9.94842	0.268042	2.52634	0.00781355	9.27435	5.56	4.8249	7.79267	9.91834	7.38211	4.98426	0	1.60672	0.15017	16.8424	13.1925	8.38772	13.5394	62.6826	2.86122	2.8727	8.16146	5.02466	104.657	2.95768	1.2551	31.5513	1.45285	0.847934	15.7557	5.78322
TCGA-B2-3924	371	0	12.8174	13.2104	1169.15	3.34829	0.628133	8.52478	0.710825	8.23708	15.1623	1.33277	9.91449	22.2319	19.5851	9.71926	0.335238	3.0613	4.82169	44.2679	7.16843	4.52476	8.9033	15.6005	6.83894	6.04865	2.40465	6.78222	133.336	0	1.34536	61.6168	0.711177	1.22363	4.53468	7.08776
TCGA-T7-A92I	356	0	2.63727	4.07789	69.8935	7.24842	0.139467	5.01231	0.0047483	1.55375	7.54769	9.36633	3.13093	9.4986	9.47314	4.41367	0.0169198	3.36288	0.0912582	0.805889	10.0373	12.9324	13.504	55.5765	4.31075	4.11518	0.469936	7.00643	83.7713	0.207619	2.15523	35.9703	2.32427	4.11074	14.8261	4.81627
TCGA-B0-5691	3431	0	12.3783	6.79623	332.566	5.00379	0.19991	6.19052	0.00849146	9.38699	6.02804	2.99975	27.8416	15.7017	11.7623	6.32982	0	4.06795	0	38.385	10.9635	7.87735	17.492	50.8144	5.39798	2.05578	8.26766	5.71546	113.275	0.0477371	0.825906	96.9982	1.13093	2.19504	11.4735	7.47579
TCGA-CW-5590	1075	1	10.182	4.65731	410.956	6.3653	0.277708	3.1593	0	5.66724	4.80362	0.629657	41.2397	18.0682	9.75471	4.93471	0	1.92051	0.0582969	142.186	9.15774	9.71364	11.3255	71.4323	3.36772	2.76685	7.76871	8.66356	80.4925	0.138945	1.25162	82.0206	1.21982	1.62737	13.588	8.08297
TCGA-BP-4176	1955	0	4.3839	4.94472	365.41	3.91309	2.21603	4.18963	0.0106504	4.91617	5.83129	0.564284	29.4291	17.5777	7.53372	3.21992	0.00474387	4.39208	0	85.6223	7.12303	7.24176	11.8038	50.954	3.30763	3.08249	4.05244	4.62186	314.122	2.39497	2.14633	105.026	1.1928	1.48045	13.4403	3.97215
TCGA-BP-4962	1785	0	4.11931	3.2899	43.3007	4.6842	0.222515	2.48342	0	5.60371	3.18482	2.73233	11.4162	9.65106	7.42741	2.84039	0.00398236	4.48357	0.0859166	57.0643	8.83984	8.71391	13.3919	73.8627	2.16391	1.90262	4.91455	4.43861	71.6669	0.262484	1.03101	67.7321	1.02452	7.39685	15.7872	4.41781
TCGA-B8-4622	181	0	7.53761	6.587	810.893	5.65533	1.30376	4.73981	0.0439091	7.62497	6.57218	0.481359	39.6809	18.1728	9.19604	4.08984	0.0167639	3.9786	0.0723339	121.915	10.2908	8.11001	11.8827	55.9769	2.21807	2.06791	4.01008	4.58008	98.4505	0.348721	1.50678	101.072	1.29112	1.43028	9.29804	7.16128
TCGA-CJ-4886	1952	0	15.114	5.83881	127.983	5.3757	0.333163	4.45284	0.0113429	8.33708	6.11943	1.27845	34.5248	13.7706	13.0153	4.21769	0	3.26038	0.0218	68.5373	9.67965	7.48247	14.5932	52.9111	4.65686	2.66942	8.68496	6.12227	118.076	1.90593	0.860865	107.259	1.29488	1.63203	11.7116	6.02812
TCGA-B0-4710	96	0	11.7587	5.97353	117.532	8.84996	0.44395	4.07642	0.272532	3.47732	6.00826	1.23291	25.1587	23.3972	10.2625	4.08299	0	3.36568	0.277926	54.3886	13.8482	8.07277	23.2684	61.9528	2.62228	3.11206	4.21768	7.56932	121.915	0.0625353	3.75398	79.3422	1.7605	6.98526	16.725	8.15545
TCGA-AK-3433	2192	0	2.24217	4.63501	45.4693	6.64564	0.0872151	2.87868	0.0466778	33.1905	4.46812	0.0478064	4.91352	20.59	10.4273	10.8324	0.0485126	6.00234	0	68.6768	13.1714	8.43942	6.89264	89.9768	5.25972	1.59792	0.978039	3.58276	28.9473	0.738642	0.481518	22.8349	1.29179	2.34304	14.7051	6.62921
TCGA-B0-4839	1639	1	6.75809	3.66701	36.221	6.48771	0.23382	1.2931	0.00557671	4.60022	2.92265	0.133734	26.8544	7.78507	6.76619	1.98725	0.00496793	1.65608	0.0428719	75.0145	6.86935	4.86289	8.53509	73.9788	1.80578	2.26576	6.04133	6.00904	50.122	0.0104503	1.01496	38.4829	0.728263	1.18998	18.2726	5.09487
TCGA-B0-5113	359	0	9.4631	7.2434	67.093	5.30451	0.506048	6.22477	0	5.02294	8.11433	1.54245	24.3589	24.3735	9.71803	5.42109	0	4.01486	0.0383871	92.0167	7.35496	8.62356	7.84593	47.186	5.23419	2.30524	4.13381	5.49346	118.061	2.50148	1.51955	78.4751	1.25666	0.688008	10.9963	8.77573
TCGA-B0-5108	911	0	15.9342	5.27015	101.582	4.95448	0.740203	3.57827	0.0103652	8.02474	5.61169	2.36371	64.0605	7.69096	11.1718	4.71035	0.00461685	6.4669	0.0398422	68.3416	10.6096	8.18501	12.8703	47.9416	2.98913	2.91987	10.8545	6.97411	163.576	0.864353	0.996699	114.245	1.16086	1.47241	12.1933	5.64224
TCGA-CJ-4902	1520	0	13.8091	3.93715	43.7023	6.05172	1.88291	3.56916	0.00786682	9.45015	5.86701	1.3583	59.6959	12.4887	12.95	4.95089	0.00350402	4.87067	0.166313	90.1417	11.552	11.3515	13.1568	55.1476	3.92258	3.69007	9.46915	6.47364	96.6918	0.169531	1.7042	99.4713	1.66686	2.17745	15.2185	7.70309
TCGA-BP-4758	2208	0	8.26636	3.17525	19.7372	6.04503	0.272632	1.90719	0	5.8185	3.60426	0.196104	29.5135	10.5392	8.65812	2.52077	0	2.8936	0.0710857	58.5991	8.33838	6.56004	9.06	95.1275	3.05845	5.4775	3.17827	5.38897	111.851	1.72411	1.1208	41.6836	0.891653	2.90892	20.9637	5.07146
TCGA-B0-4699	110	1	3.85223	5.10843	2.12639	7.31479	0.757532	5.76508	0.013341	14.9721	7.77912	0.0594866	39.0886	5.77817	7.96736	5.52511	0.0148558	8.17961	0.115381	39.3453	13.0582	11.4319	12.9791	69.8691	7.06073	3.33079	9.99631	6.97923	96.2867	0.0250001	2.10121	61.5019	1.89796	6.31574	16.9653	7.37926
TCGA-A3-3328	1385	0	1.26091	2.95815	13.6094	6.97989	0.755312	5.50779	0.0218748	19.6557	9.69417	0.043933	3.39756	13.5422	8.37267	2.96046	0.00389736	3.72356	0	31.258	11.4695	6.12086	18.4527	131.711	4.42085	3.69021	0.468093	6.94417	28.3512	0.0327933	0.889727	19.1722	1.80478	5.57459	19.0672	6.7116
TCGA-BP-5009	1092	1	8.68448	4.87247	8.15765	5.11488	1.02969	1.99554	0	4.07942	4.98471	0.436962	31.5942	8.89123	9.19192	3.50427	0.00766123	4.6934	0.0661143	94.3574	8.01036	7.28417	12.7308	55.5787	3.57919	2.61089	4.74454	6.8866	62.5439	1.07976	2.16721	60.7191	1.07474	2.88375	12.8261	5.04249
TCGA-CW-6090	2552	0	4.98308	4.80687	48.6472	3.52392	0.277908	3.26282	0	5.00773	4.95635	0.553234	62.9413	14.2544	7.76931	2.43656	0	5.96802	0.0349035	154.634	6.59689	4.5632	6.41534	33.4282	1.90909	3.0169	6.88584	4.82293	130.718	0.022688	2.20797	83.9147	1.23293	0.93559	14.7772	4.23762
TCGA-DV-5568	370	0	6.69096	4.06718	27.3321	5.36743	0.154095	2.18862	0	6.94585	4.67946	1.62954	70.63	6.72015	9.0919	3.14094	0.00501836	2.87548	0.0649606	67.0363	11.3151	7.79103	11.8112	81.5803	2.72684	5.14336	8.74714	7.74138	109.356	0.112602	1.4445	61.1319	1.09618	2.50029	17.7537	5.07702
TCGA-BP-4982	1014	0	12.9142	7.06786	136.06	5.45482	0.544854	6.18354	0.0121706	7.8615	6.48802	6.47564	30.7406	21.3741	15.1692	4.75278	0.003614	4.57574	0.0779695	65.4991	11.3333	9.14068	21.1423	45.9529	5.24382	2.01396	5.46373	4.12785	124.92	1.36587	1.26446	128.02	1.32973	2.11223	9.19012	7.63646
TCGA-BP-4974	211	1	25.3253	5.79191	61.4657	7.06231	1.10602	3.96149	0	12.6812	6.795	1.33048	56.7209	8.78054	16.2114	6.28582	0	3.0849	0.126221	73.1117	12.8993	7.74904	16.6809	57.8633	5.98209	2.83321	5.46039	8.98845	210.797	11.2403	1.35497	113.73	1.49883	4.17747	13.4122	11.8294
TCGA-BP-4335	475	1	7.28394	5.8568	81.8	5.79383	0.392477	2.6107	0.0655252	7.68673	6.7756	3.80911	27.2456	9.98517	8.75032	2.99858	0.141761	2.56476	0.0719622	58.8527	8.15965	7.03624	11.31	74.6364	2.91331	3.16429	3.16738	6.44794	181.473	0.0233885	1.60709	51.2968	1.10099	1.33543	13.989	7.64255
TCGA-AK-3431	1853	0	12.1723	5.87815	133.572	5.39019	0.586752	5.34407	0.0237903	9.79254	5.55585	2.44724	67.4684	13.2586	12.6631	3.73654	0.148352	3.99452	0	145.643	10.1889	6.09556	13.7543	63.4713	3.10869	3.08915	15.877	5.60293	121.91	0.14365	1.30304	189.945	1.37164	0.899258	12.3709	5.85642
TCGA-B0-4846	1200	1	9.88786	8.70994	210.672	4.57972	0.212676	5.6274	0.00535898	6.88763	6.43633	1.89475	16.4441	19.3344	10.7046	4.21475	0.0238698	2.77148	0.102995	62.9944	9.84092	8.59251	12.9323	45.0906	2.51243	2.84325	3.02457	4.90695	216.649	0.388304	1.23595	99.6329	1.49699	1.17619	10.5004	6.61519
TCGA-AS-3778	43	0	13.8328	5.51901	210.837	6.72111	0.16258	3.13366	0.0483408	11.735	6.04725	0.278542	28.7747	20.1035	9.76871	3.79286	0.100482	2.42568	0.020646	82.4786	14.679	7.43865	17.3307	58.8944	4.37832	2.62148	3.00273	6.63856	118.913	1.18099	2.0976	77.5957	1.41214	4.2243	12.637	8.19867
TCGA-CJ-4892	1521	0	8.07737	5.46342	240.178	7.44957	0.357738	2.10118	0.0215611	8.34628	5.71817	1.25143	17.7473	9.60025	8.37042	3.45882	0.0240092	2.33463	0.124316	27.4656	9.751	10.2985	11.0378	83.1406	3.61932	2.84945	5.81052	6.29879	86.4747	0.00673398	1.03664	47.4376	1.17009	1.9652	14.5011	8.23962
TCGA-CZ-5461	330	1	9.11799	7.17249	67.6615	6.28802	0.592195	6.68106	0	7.30481	5.99758	0.669038	27.0954	19.1996	11.5375	4.63777	0	2.99141	0.0309995	103.661	9.72019	7.55761	10.9876	76.4819	3.61541	2.90794	3.11175	5.85481	116.339	0.0125939	1.29842	136.224	1.37052	1.28329	12.86	5.23877
TCGA-CJ-4644	336	1	6.16712	5.25476	350.809	5.49675	0.190823	4.7193	0	4.30645	5.39121	2.15862	22.0558	9.57206	11.2985	4.44814	0	2.2903	0.023038	77.8066	9.56888	8.36269	14.8058	50.4743	3.97276	3.31883	5.97982	3.89552	77.5335	0.531618	1.28955	105.605	1.06778	3.55173	16.0948	4.61046
TCGA-B0-4688	101	1	4.3153	5.52037	2.75828	5.45244	0.635568	3.43615	0.0110083	0.986147	8.08673	2.20678	42.346	1.16594	10.4983	10.2561	0.00980662	3.19814	0.105786	99.9941	18.9644	3.3452	24.4235	24.9223	4.65072	5.14949	37.0647	20.6552	112.968	0.0103144	5.43465	75.8109	3.41782	11.3356	22.0509	6.71738
TCGA-BP-5181	1495	0	8.92119	5.68065	138.705	4.58353	0.168847	3.53419	0.005379	7.74657	4.42731	1.25526	29.4946	11.9425	13.448	3.54235	0	4.72278	0	44.9228	10.6631	7.55352	16.5879	57.7219	3.91095	2.20968	5.07897	6.11094	66.8049	0.712309	1.19301	101.641	1.35372	2.29559	11.6432	5.90033
TCGA-CZ-5452	1556	0	6.60252	4.30775	60.5532	7.8482	0.21132	1.63532	0.00532482	4.56468	3.6204	4.31044	14.6084	12.7594	5.97215	4.53653	0	5.18241	0	27.7292	7.87379	9.22115	14.6223	84.91	2.28485	3.73026	1.01838	7.65801	103.007	0.478959	1.20845	45.8071	1.46442	1.59721	20.298	6.05425
TCGA-CJ-6032	2548	0	9.04047	6.90558	237.761	4.36541	0.140859	3.64288	0	3.99354	3.88058	0.738026	18.3944	7.80915	12.1191	5.56305	0	1.34357	0.0340116	63.6892	8.86465	7.9141	10.9219	41.693	4.3417	3.37565	3.39045	5.70101	144.291	0.232137	0.8867	88.2107	1.07516	1.03576	12.5036	5.68953
TCGA-CZ-5463	662	0	5.18187	8.2438	61.8808	4.50517	0.429444	4.15276	0.026464	2.79462	8.27295	0.045118	16.6317	32.925	7.27703	5.80985	0	3.5235	0.0381461	58.8225	5.71191	6.5621	13.3075	43.7113	4.47738	2.8861	1.67235	9.35545	82.408	0.735608	1.24799	95.8441	1.08713	1.69813	10.7426	4.75795
TCGA-A3-3324	1186	0	9.15721	6.69054	36.8851	5.39857	0.216121	3.45329	0	4.84109	6.23169	1.00221	20.6997	16.6562	9.79486	5.34932	0.00899143	3.6279	0.0387968	72.563	8.18136	7.34159	11.2563	38.0494	5.22991	2.3136	4.88663	6.54282	78.0441	0.151312	3.14963	79.1538	0.982013	1.17533	10.1028	6.96228
TCGA-BP-5183	1291	0	8.44126	5.46189	153.627	6.35059	0.149945	2.69493	0.0185766	2.6002	5.58565	0.190258	16.5391	15.2003	7.85403	5.45486	0.00551624	3.13994	0.0714054	41.5612	8.48254	9.56035	25.3497	79.7859	3.40331	3.3571	1.9379	10.0663	47.9838	0.150849	2.47754	45.3209	1.60657	3.9262	19.0866	8.95905
TCGA-BP-4169	701	1	11.0184	5.48763	87.3876	6.03606	0.722733	4.31341	0.0203498	11.2189	7.22225	4.66043	46.2171	11.2288	10.4645	6.61715	0.00725132	2.38077	0.140798	125.953	12.2023	6.64478	11.3856	45.297	4.36329	3.16827	8.97049	7.02277	256.387	7.10817	1.51745	120.433	1.86551	2.59547	10.4797	8.24526
TCGA-A3-3317	1491	0	10.7554	7.1361	17.7205	5.45032	0.265032	3.80641	0.0332972	5.68945	6.07695	2.2915	19.4497	23.3717	13.6316	6.65244	0.0247186	4.53669	0.0639943	61.5082	9.30315	8.42931	16.3079	47.5731	6.25452	4.04491	6.25681	8.8686	96.0277	0.128259	1.53751	93.8462	1.22865	2.34806	11.8304	7.96676
TCGA-AK-3451	1481	0	1.63698	3.13793	67.2735	3.48388	0.0760163	1.20944	0.0221109	5.18568	4.61587	0.518086	8.91218	4.08505	4.39015	1.02086	0	1.26367	0	36.2156	3.17805	6.28433	10.0656	103.028	1.29333	4.869	4.80047	2.24108	46.594	0.197964	1.5532	34.7236	0.452561	2.38153	16.9378	1.48667
TCGA-BP-4355	953	1	15.4522	4.73381	103.831	7.68194	0.743402	3.69138	0.0288312	16.9637	6.23633	1.75009	43.1127	8.84865	15.3946	4.06166	0.0102735	2.28423	0.177316	57.4303	10.3428	8.62787	12.7156	79.0242	4.26123	2.94795	6.95614	7.99781	84.5666	0.0432221	1.20241	80.6033	1.05721	1.3148	13.2234	11.4586
TCGA-BP-4346	1493	1	11.2915	5.88321	17.3767	8.6594	0.431564	3.74526	0.0297035	4.55308	6.40744	1.37387	12.2038	12.7709	9.07342	5.05526	0.0211687	5.63536	0.0685051	70.9161	10.7272	12.8246	14.6803	59.9507	3.7214	2.98741	4.24275	7.36581	95.9023	0.489827	1.88226	56.2058	1.93692	3.21621	12.8518	8.96361
TCGA-CZ-5988	693	0	5.01843	6.39657	283.929	2.51169	0.217961	5.49028	0	7.38507	6.34926	0.712447	74.6063	8.64672	9.90024	5.07052	0	1.90639	0	252.41	10.373	4.53648	19.6991	36.3905	3.56225	2.7424	11.7011	5.78822	153.924	0.463135	2.03961	138.812	1.71705	4.05825	8.70106	3.92034
TCGA-BP-4165	3037	0	9.14492	3.68069	83.1499	7.84276	0.533787	1.87782	0.0269006	7.29217	4.16354	0.204617	26.3059	9.42043	9.68456	3.26025	0.011982	2.73192	0.0258504	45.7517	9.75691	10.9353	10.1885	98.3217	3.70958	3.72831	6.49394	7.12078	61.8714	0.0714139	1.35777	57.0649	1.03527	1.13983	17.0962	8.42712
TCGA-CJ-5676	2575	0	7.47255	3.65761	99.5269	7.14054	0.227968	2.06912	0	8.85516	3.36297	1.10661	70.4412	7.61317	6.8092	2.75643	0	2.58081	0.0262294	125.937	7.13113	8.99312	9.13546	96.8547	2.64337	2.95257	4.75479	6.55707	91.3855	0.00426242	2.09167	29.9002	1.08586	1.23143	16.8167	5.30533
TCGA-BP-4771	162	1	15.5565	4.03959	31.581	8.07541	0.420113	2.57171	0.0460749	6.28994	6.41671	0.534041	27.8383	9.24222	8.26706	4.61039	0	5.51606	0.0983912	62.8962	10.2857	11.3802	12.016	66.0223	2.95608	2.8645	6.49082	9.59184	114.737	0.163089	1.6296	67.0651	1.95694	3.48321	15.6929	9.40759
TCGA-A3-3372	735	0	12.5384	9.46441	354.926	6.18968	2.75971	5.00211	0.0207037	7.38972	7.98481	6.42645	25.4727	20.6648	9.53656	5.66234	0	3.41344	0.0795815	93.1408	9.53732	8.12316	14.4077	41.7316	5.19938	2.80612	6.12633	6.32336	94.7093	0.0226317	0.884811	106.928	1.13251	2.07007	10.9586	11.4603
TCGA-CJ-4875	2353	0	6.53335	5.59847	12.0804	7.93157	0.281594	1.78034	0.032369	5.1147	5.56626	0.306612	15.797	10.4319	7.57856	2.57267	0.0288354	2.18728	0.0497684	55.5326	5.23954	6.92203	12.5013	66.9267	2.4435	3.2013	4.92652	5.62832	36.4513	0.0161752	1.93192	34.109	0.823018	3.1496	17.2038	6.67484
TCGA-BP-4760	2361	0	7.82622	5.92373	91.6884	4.64126	4.0676	4.63116	0	9.2891	6.6712	2.51815	17.8372	15.3529	12.2961	4.39386	0	1.65475	0.0615836	55.7572	11.6819	8.77703	15.5628	59.5973	6.16743	2.6615	9.62091	5.86485	165.848	0.39697	0.885394	129.403	1.32554	3.24941	11.4561	7.24014
TCGA-BP-5170	2412	0	5.57636	4.26131	76.5088	3.25324	0.299917	2.31359	0	6.02529	3.89409	1.24282	40.986	12.5484	10.4996	2.60603	0	2.48442	0	140.363	7.2743	5.13418	9.86191	49.5232	2.33742	2.95866	4.75407	5.515	134.81	1.51636	2.47319	62.5116	1.01759	0.92123	18.2538	5.05266
TCGA-AK-3453	1397	0	4.98057	4.12216	26.8487	8.31035	0.260457	1.9778	0.365703	4.16195	4.86481	0.346602	10.7272	10.3942	5.57551	3.77598	0.201218	4.43562	0.70285	28.0905	6.51427	10.9932	9.53841	91.1826	1.53132	4.20382	1.88447	7.85885	65.0536	0.853266	3.02752	16.7495	1.14416	3.82962	20.7618	6.91317
TCGA-A3-A6NJ	468	0	15.1218	5.77798	79.4543	8.54064	0.431014	3.25912	0.0425833	4.7835	6.53045	3.00974	21.6293	16.0545	8.72112	4.7967	0.0162577	4.45837	0.0233833	27.854	12.8427	11.7145	16.2189	75.4428	4.0323	3.85427	4.32835	9.3535	154.724	1.97975	1.12061	48.4312	1.92029	1.6393	17.2148	7.68964
TCGA-DV-5573	1130	0	7.22347	5.80805	75.775	5.75979	0.377255	3.59059	0.135096	5.14954	4.94796	1.60421	13.2208	13.5898	8.15562	5.33375	0.120349	4.25616	0.047208	31.3997	8.70756	8.36532	16.4471	56.1398	3.93618	3.64947	4.6238	8.01872	103.094	1.13155	1.8099	49.3279	1.47107	4.545	16.6766	8.10938
TCGA-BP-4177	1670	0	5.91002	5.30476	113.678	4.54096	7.1651	2.72268	0.0584036	12.9405	5.20003	1.97975	18.5748	18.503	9.61369	3.47234	0.711049	1.14807	0.0561234	45.6937	7.52547	7.6222	13.5437	69.8345	4.31858	3.45026	6.63938	9.07331	155.547	0.0121604	0.860685	82.9189	1.12384	1.16909	14.1272	5.35069
TCGA-AK-3461	853	0	11.4264	6.94631	935.265	5.44711	0.303628	5.18405	0.0956762	15.3927	7.98767	3.36878	35.7368	32.3081	10.7978	5.1433	0.0655629	1.71959	0.0848684	58.2071	11.0941	5.22304	18.469	60.0212	4.14733	4.14644	7.14605	8.45171	147.33	0.330997	1.30693	93.6178	1.09477	1.24738	11.767	7.76399
TCGA-A3-3320	1508	0	9.13147	7.61354	658.793	5.73345	0.21324	7.23815	0.0444938	5.38364	4.97934	2.69833	21.4751	22.8872	12.6437	4.56049	0.0445912	3.12252	0.0213783	29.4037	9.14567	7.6264	11.4705	47.5975	4.70672	2.84339	2.11994	5.60705	180.35	0.413416	0.754053	78.0946	1.15439	0.745978	9.78357	8.19948
TCGA-BP-4784	1854	0	9.88435	5.88368	132.796	7.28603	4.35809	4.47557	0.0118664	14.3692	6.09369	6.15196	40.7619	4.06814	13.79	3.87595	0	3.87296	0.0456125	93.859	12.2841	6.99074	15.2039	60.3435	5.48078	3.25871	13.9898	6.26765	107.771	0.307609	1.11045	115.557	1.19558	1.3601	13.7792	5.61107
TCGA-B0-4701	238	1	7.25171	5.92984	241.974	6.80163	0.369443	3.63893	0.00626511	10.6753	7.05897	2.63018	26.6969	30.1049	8.3528	4.30892	0.0111624	2.05709	0.0722461	68.5353	12.6321	15.0031	16.9949	76.6758	2.64684	4.56648	3.65329	11.7261	150.668	0.0156538	1.58343	54.6341	1.31123	3.46824	15.3562	6.38747
TCGA-B0-5705	3668	0	8.05764	5.99086	165.993	4.80946	0.0884026	4.31723	0.0132903	4.62446	4.97272	0.233721	13.7258	15.8561	8.84223	4.82409	0	2.09747	0.0170285	27.6076	7.95466	13.4161	14.341	46.8092	4.23308	2.71554	1.59972	5.59963	76.4962	0.971294	0.731198	52.5215	1.98844	1.45308	15.0964	6.40592
TCGA-BP-4799	1133	1	3.9654	3.54802	26.6402	2.00837	0.607474	2.51124	0.0118312	4.81722	4.50674	0.367952	41.4464	2.29655	10.2806	2.10951	0.0105397	1.06398	0.15917	189.213	5.07084	6.5178	4.84541	32.4012	1.30443	3.34426	10.5779	2.89314	137.934	3.85403	0.553577	85.3194	0.204641	0.375082	6.55677	1.90269
TCGA-A3-3373	1621	0	5.61521	5.23491	964.057	4.50648	0.117133	5.53353	0.00411353	4.19933	6.89307	1.19793	23.2267	30.2782	8.12817	4.05465	0.00732895	1.79547	0	64.5748	9.49742	9.65073	16.4172	54.564	5.5595	3.81402	6.56333	4.80888	125.381	0.341741	1.40639	92.656	1.06726	2.85899	10.9914	4.55624
TCGA-CZ-4866	1768	0	4.17143	6.58486	207.103	4.59577	0.095559	3.83815	0	4.55827	5.19048	19.4116	10.4059	5.94994	12.2644	4.91578	0	3.14299	0.151221	22.1441	6.21663	8.57018	13.1591	59.0714	3.94456	3.35003	1.30224	4.9311	93.7145	0.131062	1.03874	67.0691	1.46301	1.86284	13.6793	5.71321
TCGA-MM-A563	591	0	8.24176	4.85868	44.4476	9.44236	0.49557	2.86205	0.353956	6.37585	5.00583	1.31212	30.2032	14.9423	9.97661	3.85476	1.07908	5.1961	0.120937	57.2746	10.547	10.0211	16.3313	90.7681	2.83864	3.41352	8.3106	7.94139	76.9391	0.50115	2.48059	64.9334	1.55777	6.52182	18.9356	6.22763
TCGA-B0-4718	616	0	6.46532	3.80823	63.9487	8.24759	0.198229	2.6429	0.0700282	8.00492	6.25844	1.52714	59.7146	15.1825	7.9319	2.63432	0.109171	2.44743	0	96.7251	7.36945	6.94328	5.6845	101.009	1.90123	4.32863	2.32973	7.62753	107.095	2.59721	3.88288	45.6581	1.13555	1.50496	19.3195	9.36408
TCGA-B0-4703	182	1	17.5176	5.63373	22.5421	4.90306	0.543889	4.40186	0.0218046	8.88816	6.61378	0.267981	69.0156	4.94223	13.5316	5.85771	0.00971214	3.5308	0.0838131	154.138	11.1295	11.0218	21.929	57.1395	3.29922	2.28494	12.6927	6.41284	99.3037	0.00681003	1.75527	203.686	1.60287	3.55603	12.6398	8.16361
TCGA-BP-4325	2964	0	7.7214	7.39664	170.711	5.06735	0.169066	4.87978	0.0393902	3.03505	4.40819	0.34242	8.98032	27.0842	12.0514	3.73979	0.0350901	3.12457	0.173039	26.792	10.2242	9.0119	15.6362	49.7395	5.40301	3.23917	2.7018	6.06064	112.196	0.748687	1.25634	58.6223	1.04145	2.44952	11.6885	6.94624
TCGA-B0-5100	1913	1	6.85414	5.18122	8.43972	8.20092	4.6077	2.09605	0	9.71655	4.52092	3.52781	31.2502	6.76336	16.2596	2.38143	0.00524859	3.05031	0.181175	78.9704	12.2595	9.99722	13.0068	133.325	4.42421	4.21848	8.88051	6.47896	58.8281	0.00736048	1.11137	73.533	0.438204	1.76009	19.8628	6.36416
TCGA-G6-A8L6	313	1	9.26969	4.35842	100.069	9.02371	1.15299	1.8445	0.037604	7.66715	5.02217	0.380436	27.2757	11.1174	7.47885	2.44564	0.033499	4.47208	0.144544	82.3152	10.3642	8.12227	8.58226	130.137	0.915102	4.0556	6.43744	9.85228	70.8075	0.00587226	1.75255	33.3171	0.934986	1.21508	26.3066	6.28482
TCGA-CJ-4640	1998	0	5.50559	4.34346	28.7796	5.0169	0.189567	4.93709	0	5.87978	5.23671	1.84995	27.1919	20.3712	8.02792	3.18856	0.00464925	5.09988	0.120365	45.034	5.81651	7.57753	16.1583	61.4314	3.90519	4.12994	3.56677	5.12542	99.225	0.00325999	2.47654	69.6172	1.39469	2.59003	17.9938	3.00348
TCGA-B0-4811	1417	1	6.12154	4.62762	23.2285	6.50417	0.271575	1.35774	0.142188	5.60867	7.51251	0.436483	17.3389	5.25685	7.29356	2.84077	0.168888	3.05988	0.263152	40.3466	7.27885	11.9898	7.19203	62.6245	1.9075	3.12973	2.99335	6.22379	36.9105	0.121712	1.60647	16.0324	0.573856	3.23633	15.6633	8.53848
TCGA-CJ-4891	819	1	3.51702	3.68944	33.5528	7.44331	0.222278	2.3748	0.0357709	4.35839	4.81025	0.33087	39.0716	5.10103	5.86641	2.90971	0.0273137	1.89833	0.117855	115.603	9.54741	13.2523	8.58807	84.4568	1.26894	4.41231	5.7614	8.58628	67.1478	0.022344	1.76595	34.1474	1.67938	1.09042	23.5182	6.0752
TCGA-CZ-5462	311	1	2.75162	3.77043	14.114	4.73699	0.102627	3.53053	0	1.54656	8.52975	0.147968	10.6717	19.5832	9.87365	3.43326	0	1.89834	0.0344981	26.3648	5.26014	10.6995	12.3595	43.6413	3.89566	6.32778	0.62417	5.27252	116.888	0.00840917	1.71941	56.2024	1.48251	0.56906	13.8864	4.25367
TCGA-BP-4807	211	0	7.49183	6.22997	18.8826	5.1932	0.1693	5.29513	0.00692737	4.51634	6.32193	1.46189	20.6736	17.7827	11.0404	4.44688	0.00617114	4.32007	0	44.6206	12.3573	5.13522	14.7392	46.8819	5.09177	1.9269	2.58489	4.49228	93.2613	0.00432712	1.2863	119.45	1.38393	2.54249	9.76382	5.53796
TCGA-BP-5174	2257	0	4.6766	3.65778	37.5193	5.49156	0.124641	1.7792	0	4.99989	3.62012	0.150284	16.6074	9.31716	7.56922	4.22342	0	1.41474	0.0199699	22.11	8.52044	12.7697	13.5886	66.0702	2.44602	3.30838	2.46666	7.90634	48.6966	0.07464	1.51594	33.3794	1.34344	2.81268	18.133	5.97403
TCGA-CJ-6031	1906	0	10.8155	3.94739	20.5384	4.91689	0.649796	3.15774	0	7.0441	4.81078	2.50495	44.8267	9.95476	10.8714	3.44089	0	5.01139	0.0376345	60.8178	10.9239	9.889	13.9265	61.5488	2.0455	2.52798	9.5525	5.21716	80.6386	0.0030579	1.27333	90.8013	1.43524	2.75777	14.1445	4.50337
TCGA-CZ-5451	1668	0	15.1142	5.18034	838.506	5.35403	0.184076	3.23576	0.0132417	6.73012	4.39534	8.0359	23.9298	21.7939	8.90795	3.8733	0	3.59472	0	86.5647	9.41007	8.03837	17.1118	52.2182	3.85811	2.50241	2.39082	5.61283	118.204	0.0206783	1.00498	67.6363	1.45439	2.84979	12.989	5.84165
TCGA-B8-4143	709	1	10.6436	4.97253	43.4391	6.88293	0.404159	3.23195	0.0138127	11.2007	5.70194	0.130425	32.2557	21.1745	7.91315	2.99502	0.00615242	3.83873	0.0530937	128.266	8.76402	11.2072	12.0125	65.3313	3.43453	5.9855	8.99657	9.54857	139.374	3.76612	2.89558	58.3499	1.53502	4.00006	14.7145	8.87214
TCGA-BP-5182	1165	0	8.54467	4.55143	45.0543	4.68925	0.31005	3.65761	0	6.30395	5.5143	3.54517	22.6082	8.26435	10.1847	4.81999	0	7.49889	0	48.7845	11.6767	8.84413	15.5533	46.2054	4.05935	2.60025	9.69478	5.90024	114.214	0.874777	1.13899	94.812	1.37493	2.00833	12.5853	5.72752
TCGA-BP-4329	845	1	6.52925	5.2069	209.708	4.14481	0.233197	4.72369	0.00486011	7.09302	4.97514	1.23032	20.2127	15.6671	9.70809	2.18353	0.00865911	5.75676	0.0373629	139.05	10.6976	6.912	10.2773	62.9243	4.59892	3.0824	9.61354	3.49126	129.945	0.0151791	1.08866	98.7332	0.811216	0.539276	13.5763	4.6936
TCGA-CJ-6033	224	1	7.91203	4.92267	15.9029	6.42694	0.624748	2.6863	0.00947752	7.6706	4.89294	1.54975	71.5863	8.01156	10.5266	3.40832	0	1.94093	0.03643	91.825	8.23423	10.1829	13.647	80.0772	2.24048	3.90249	7.55457	8.28405	67.7672	0.769607	1.50144	71.3078	1.31554	3.00464	18.9154	4.70516
TCGA-B2-A4SR	507	0	18.4924	6.41372	222.035	6.91688	0.374965	4.7827	0.00619391	11.5673	7.50973	2.09062	36.0637	11.4163	13.4302	5.47351	0.00551775	3.17898	0.119042	88.3228	12.2734	9.15964	16.0943	69.0856	5.69288	2.36497	8.22589	6.66799	90.7262	2.94816	1.02232	95.9437	1.51595	2.27329	11.5799	10.0749
TCGA-BP-4159	2601	1	5.94911	4.28805	121.448	4.6605	0.324734	2.68079	0.0478219	8.0027	4.87576	1.79496	27.8647	9.21605	14.232	2.54629	0.0243437	2.34648	0.131299	119.831	7.55223	5.29963	11.3587	73.4131	2.75502	3.67301	10.416	3.31764	76.3177	1.08818	1.00174	88.2368	0.779894	1.43279	15.0199	2.79355
TCGA-BP-4795	620	0	14.8198	4.49212	15.914	5.95043	3.09084	3.74931	0	11.0596	5.58273	4.52594	36.1329	7.40699	13.4589	5.339	0.0085399	3.30337	0.0184242	73.6746	12.7403	6.83494	17.2566	73.8042	4.18647	2.19433	9.14784	5.6624	77.1336	0.182636	0.858235	162.183	1.38868	1.74751	11.6204	7.37691
TCGA-B0-5709	3117	0	15.6604	7.88493	28.3518	5.06573	0.289226	5.3762	0.0093475	6.4576	6.48179	2.35928	30.5806	14.7425	9.94306	5.33425	0	4.64826	0.0359302	54.7263	11.7915	13.9842	17.0592	57.7814	4.59898	2.47669	7.03838	7.1057	114.414	0.0204359	1.07791	107.27	1.68956	2.0117	13.1749	6.40167
TCGA-BP-5201	951	0	5.15688	5.00035	55.556	7.58539	0.218531	2.31223	0.0480126	5.13438	4.5256	1.35791	19.4148	14.7643	7.28087	3.24168	0.0427713	2.64983	0.129186	56.1368	8.40321	11.8646	20.2391	89.2399	2.83594	4.72372	2.87033	7.20978	100.502	0.0209935	1.31251	31.0158	1.10866	3.03841	18.5412	6.86752
TCGA-A3-3380	567	0	11.4534	4.60217	997.172	4.94853	0.305122	2.86782	0.00996962	14.3547	5.60802	0.348159	31.6079	13.4988	10.5063	2.84338	0.00888129	2.28749	0.0766431	96.7569	10.1038	5.13002	14.9208	47.7286	5.08992	3.42468	7.48015	5.90838	86.7258	0.00622744	0.951312	65.7545	1.03465	2.03619	12.2423	7.74841
TCGA-CJ-4893	750	0	10.7792	6.23861	83.8014	5.52135	0.237951	4.38449	0.00453533	4.01768	3.91486	0.176736	23.8839	14.0694	12.4488	4.33906	0.0121207	2.42175	0.0697321	54.4348	8.92861	8.76563	15.1035	56.8774	3.63689	3.08667	4.17924	5.81522	88.5927	1.44764	0.838797	78.9843	1.24729	1.29957	12.5645	5.62336
TCGA-CJ-4887	932	1	7.30999	3.9707	161.14	7.19788	0.307226	1.75685	0.00578159	6.00289	3.12769	0.358749	24.923	8.88832	7.42951	3.76234	0	4.36357	0.111117	58.746	10.3514	9.4911	14.1361	59.0479	2.77181	2.97813	4.50801	6.31799	78.2761	0.642833	2.04912	29.3053	1.24503	3.22172	17.7437	6.03889
TCGA-B8-4621	431	0	1.90757	5.90103	32.8708	3.23593	0.121487	4.71372	0.00860059	7.80889	7.04804	0.404119	6.17512	7.12131	6.80675	6.75989	0	3.86724	0.082648	11.9124	8.0967	8.50414	10.8125	49.2751	1.98476	2.28156	0.557878	5.14359	78.4197	0.171913	2.27191	62.9173	1.10828	1.89815	9.74158	6.57464
TCGA-BP-4983	1413	0	9.24919	5.12807	9.2434	4.81023	0.354444	2.52061	0.0141146	5.32397	5.0745	0.117762	60.92	2.42786	11.0322	5.78444	0.00838249	3.68273	0.144677	53.0327	8.87513	15.8289	28.2156	39.6735	1.81632	3.54436	25.0374	10.961	145.432	0.038205	2.64512	96.4272	1.41191	7.63568	9.85268	6.6315
TCGA-B8-A54F	519	0	9.74144	5.66358	646.594	5.52658	0.275213	3.87903	0.0261161	13.5173	7.45559	4.20589	32.2739	18.9153	7.62437	3.69626	0.0348977	2.47299	0.0501929	64.5442	13.1856	6.51281	14.7545	49.6773	4.43582	2.33738	6.19977	7.2986	183.447	2.57749	2.18413	75.0256	1.68267	1.73552	12.6503	9.09517
TCGA-CW-5589	2378	0	13.6581	5.20312	107.492	5.64135	0.201269	3.72843	0.00557556	7.17293	5.24132	1.64626	39.0998	15.2361	10.5354	4.55499	0	4.4455	0	58.9912	10.0679	7.39281	16.2342	51.5862	4.2237	2.34068	7.50163	5.93099	86.8895	0.365687	0.858637	83.6054	1.35979	3.22248	14.3768	6.95293
TCGA-EU-5904	551	0	15.2942	5.35752	890.579	4.67351	0.198844	5.39948	0.042231	12.2919	5.03152	0.495289	47.0895	26.3873	11.9198	4.17435	0.0940521	1.50552	0.0405822	50.216	8.56508	5.16363	14.2119	60.3179	4.24713	2.15155	3.21234	4.91931	268.666	0.0329741	0.50955	105.463	1.07286	0.984819	10.965	5.65287
TCGA-BP-5196	1018	0	7.24364	5.11306	10.322	6.50432	0.818784	2.59884	0	5.86172	7.12065	1.01949	41.4949	10.1828	7.21548	4.15689	0	3.7765	0.0216619	193.935	7.28691	10.4107	17.6133	72.2782	3.69814	2.97544	4.2735	8.26841	120.786	2.28811	1.30803	61.2613	1.41827	2.3913	18.9851	7.00601
TCGA-CJ-4901	1450	0	8.27555	4.36726	32.2907	6.07992	0.581328	2.93577	0.0329585	4.91397	4.5792	0.414121	31.773	9.31091	9.36575	3.53033	0.0195737	4.20738	0.105572	185.609	11.6778	9.32852	11.4769	65.1008	2.53892	3.36713	4.16551	8.25947	108.011	0.00686242	2.05615	55.4377	1.24941	3.858	11.9368	6.82596
TCGA-BP-4768	400	0	5.47572	5.20537	63.7972	6.36184	2.10461	4.35523	0	4.779	5.19943	0.0478573	12.1182	22.6195	10.0178	3.92129	0	4.26225	0.0541479	101.108	8.01168	5.13378	12.6111	59.9376	4.11371	2.77855	1.77726	10.727	71.7606	0.747941	1.27326	60.1927	1.05585	1.44285	10.9279	9.73451
TCGA-BP-5178	1912	1	3.93625	2.90608	482.59	3.2699	0.0960778	1.77145	0.00451062	6.26027	3.21921	0.0885627	65.4891	4.08772	4.68131	2.65355	0	3.91738	0.104028	117.517	6.52185	10.4525	7.80502	53.343	1.06929	2.72424	2.84136	6.84881	64.615	0.00281752	2.55586	49.9746	1.61889	1.49599	15.1737	4.97998
TCGA-A3-3358	1307	0	6.26721	4.64356	260.28	4.75127	0.233378	3.41354	0.0477067	4.77818	5.45428	0.163156	22.6454	10.6582	7.10946	3.57588	0.00772705	4.14808	0	44.7322	10.7047	10.046	11.7044	47.8116	2.00456	3.3119	2.60436	5.6185	86.2897	0.00541811	2.07399	52.5164	0.960195	2.89795	11.5148	7.03539
TCGA-B0-5092	459	1	10.4782	3.69986	108.9	7.70768	0.431404	1.88067	0.0336377	6.3196	5.68498	0.650366	19.2344	6.42894	7.57228	3.62058	0.00599312	3.96928	0.181016	73.1461	6.99743	15.5549	11.0648	93.7911	2.60163	4.47035	5.56049	7.95412	122.067	0.00840459	1.86884	31.4015	1.66982	3.99492	22.0189	10.3114
TCGA-CJ-4918	93	1	20.1008	5.21156	16.7602	5.03881	0.280661	4.43405	0	6.71401	4.94455	0.864085	61.0333	18.5022	12.6187	4.5735	0.00453295	4.26238	0.0195591	94.8001	11.0234	5.28468	16.2107	56.9576	3.7637	2.6178	6.9415	5.9611	102.161	0.305131	0.903598	129.9	1.14417	2.04128	9.88996	6.14716
TCGA-CJ-4903	1560	0	8.13966	5.29628	221.982	4.49032	0.294776	3.33729	0.00428245	5.0005	5.35316	0.767013	20.4718	17.1027	6.17264	3.67005	0	2.38989	0.0823049	63.0768	6.56663	7.48879	11.11	46.4235	3.78291	2.96419	2.54298	6.73202	96.4359	0.00802498	1.72605	62.8975	1.27404	1.27933	12.8309	6.72717
TCGA-BP-4981	1097	1	4.01883	4.73488	111.524	6.79387	0.273468	1.2083	0.0167079	7.21682	4.45692	0.322203	19.2408	13.1545	5.43864	1.96918	0.0396905	2.47145	0.278296	44.7131	4.83488	8.94811	9.17799	89.7965	1.89926	3.89077	2.55483	6.74363	53.555	0.775775	0.808426	22.9894	0.871788	2.80462	21.7032	7.43419
TCGA-B2-5639	417	0	5.05968	5.20422	41.8283	6.07213	0.400592	3.88757	0	3.40891	5.0624	0.285735	15.4063	16.076	8.34837	5.01473	0	3.14863	0.0383664	68.3214	8.83975	10.4793	16.6524	54.5779	2.15468	2.39719	1.32157	6.60529	54.2701	0.149634	1.25029	55.3664	1.32072	2.36109	17.8124	6.45361
TCGA-B0-4847	793	1	4.36981	4.16658	27.9378	8.22582	0.215231	1.47208	0.0148827	3.93948	4.49382	0.256521	9.31282	8.65183	5.02413	3.41443	0.00662903	4.5322	0.34324	29.0592	6.00229	11.6399	9.13056	90.7928	1.60145	4.39368	1.45303	7.05167	64.5324	0.841322	3.08699	13.0425	0.99751	3.35721	19.757	6.43082
TCGA-B0-5075	637	1	4.78524	4.36497	16.9951	4.7293	0.104534	2.69132	0.00405414	2.90794	5.50778	0.435065	12.4304	11.3498	7.15814	4.2197	0.00361157	8.47295	0.140251	28.2444	7.72634	10.4009	12.8396	50.0161	2.50471	2.65215	0.802471	6.03003	72.7391	0.405182	1.48168	36.496	1.23417	1.98229	13.6627	6.19162
TCGA-BP-4963	1834	0	12.4696	6.07911	343.109	6.5514	0.297494	3.93001	0	6.65835	4.54634	0.612192	31.7208	13.504	9.62042	5.40526	0.00463524	4.69384	0.160003	86.5054	13.668	9.25862	15.9228	58.3148	3.35592	2.64002	3.52819	7.00701	78.1083	0.224262	1.12336	75.7929	1.57498	2.81062	12.3998	8.38783
TCGA-B2-5635	315	0	11.8413	13.0638	383.604	3.25142	0.802331	13.0742	0.141592	5.16491	14.1986	0.495818	14.813	39.2956	14.0538	9.21272	0	3.56287	2.96867	54.5202	4.6775	3.31022	10.4803	9.1651	6.00915	4.63302	3.1504	4.71196	130.78	0.00804039	2.0961	69.9045	0.823779	0.784765	3.8129	6.2314
TCGA-CZ-4857	1432	1	8.6851	4.93979	29.6846	5.26404	0.229047	3.93753	0	7.92156	7.77635	0.359859	23.727	5.11426	8.58533	3.45751	0.00579642	3.30307	0.0750323	84.6591	10.0805	6.73312	10.6114	35.1517	3.59772	2.36292	6.38746	6.4317	105.249	0.471468	3.31295	89.9796	1.10857	3.42744	9.58171	7.36593
TCGA-BP-4970	433	0	9.35154	6.11192	28.4687	4.66181	0.325768	5.61102	0.0105285	5.24416	6.72717	1.19192	20.9145	20.7373	12.0477	5.62463	0.00312639	2.45604	0.0134899	65.0979	10.0796	7.81136	15.7444	52.247	4.53632	1.95917	6.33649	6.08678	117.51	0.0219218	0.99042	150.359	1.63594	1.61756	11.6015	5.98395
TCGA-CJ-5677	782	1	6.87528	4.83741	15.4813	4.58431	0.676339	2.2253	0	3.60939	5.22463	0.674093	31.9659	5.57802	8.55533	3.29871	0	2.52764	0.0522292	47.9262	6.7098	11.9864	15.087	53.9704	2.37087	4.17324	6.02423	5.19795	58.6661	0.0763876	1.96737	56.5202	1.01648	2.81658	20.0174	5.24294
TCGA-B0-4714	99	1	7.74958	4.49504	49.8259	7.55783	0.374381	2.38482	0.0545224	6.46988	6.26858	0.545468	16.7484	11.7828	7.81487	3.67125	0.0364278	5.61726	0.235772	36.0056	9.47399	11.1044	9.41323	69.0791	2.956	2.9884	3.40899	5.9554	63.5573	1.03448	1.35086	35.012	1.46763	2.02768	16.4152	9.94471
TCGA-B4-5836	141	0	8.41385	7.12033	714.911	4.55299	0.182248	4.59231	0.07157	7.25413	6.35576	5.81551	27.8193	14.2873	13.3043	5.24367	0.118406	1.33766	0.0393004	105.711	8.09746	9.61512	17.7418	51.4568	4.16376	3.17312	6.97384	6.40138	104.882	0.0159663	1.62351	113.776	1.12739	2.39987	10.2774	5.19654
TCGA-B8-5552	392	0	20.0434	6.22897	54.6497	4.89423	0.300387	5.32078	0.0242706	7.86335	6.0616	1.99053	45.0699	14.4224	14.0827	5.87994	0.00864842	5.40152	0.0373167	63.6141	11.121	6.88057	15.7058	57.1478	5.62825	2.49413	6.51148	5.87766	107.784	0.736796	1.41638	135.228	1.42312	1.87626	10.1888	7.37207
TCGA-B0-5692	1487	0	8.30283	5.93068	53.3854	6.94926	0.17533	2.61852	0	3.14127	3.74775	0.102665	14.3791	16.2246	6.29524	3.11576	0	3.92294	0.0699018	23.3547	8.52271	13.8212	17.6896	76.2166	2.83391	3.26299	1.66198	8.94463	61.0764	0.056797	1.94297	38.1555	1.66711	6.55617	23.2767	7.1301
TCGA-BP-4347	1367	0	12.0226	5.38585	296.935	6.84931	0.281863	3.13613	0	6.98012	6.34755	2.2645	24.2457	13.4946	9.62013	5.71724	0.00695579	1.69749	0.0600265	48.9658	9.97458	9.26251	10.4151	47.0516	5.64094	3.35085	3.76986	10.7205	92.558	4.11401	1.44122	87.8828	1.18511	1.82323	12.3703	8.83493
TCGA-BP-4961	1935	0	12.8624	6.53118	304.084	4.69098	0.300645	6.1033	0.00395541	12.6403	6.25728	5.38413	43.5	18.1086	14.6827	5.62207	0.00352361	2.21182	0.0456117	83.622	12.1552	5.47976	14.3824	47.5334	6.77064	2.52389	7.26854	6.00773	115.739	0.0148243	0.658679	122.677	1.28963	1.15751	12.6961	8.71769
TCGA-A3-3316	1493	0	8.45356	5.64182	65.4095	3.20238	1.39285	3.53291	0	6.67564	5.13977	0.848282	38.347	8.77989	11.6729	3.88146	0.00806705	5.19571	0	91.5186	8.77761	5.43952	13.1872	28.6863	4.37143	2.22734	11.0817	6.17984	170.429	0.00565651	2.15524	114.422	1.20607	1.85503	8.02527	5.56432
TCGA-CW-5585	2609	0	12.7706	5.58711	554.042	6.28145	0.24385	4.56464	0.00451276	5.028	3.13307	2.49513	24.7611	34.0775	10.3072	3.60717	0.00804025	8.93585	0.0346926	43.7245	10.1292	10.7279	18.5001	68.3058	5.77932	2.8098	5.22672	5.47099	64.4912	0.140943	0.827973	72.8264	1.09668	2.49267	13.5757	7.30445
TCGA-CZ-4859	1787	0	5.84736	5.45712	205.168	4.38092	0.147192	3.98758	0.00402749	5.97557	3.33022	0.412285	12.5953	24.9606	10.4206	3.6615	0.00358783	0.636371	0.015481	25.451	9.37364	7.2995	15.1078	50.0538	5.95259	4.04025	1.89603	5.26116	122.115	0.825162	0.91106	70.4959	1.01707	2.41614	12.2137	7.40321
TCGA-A3-3331	1257	0	13.6663	7.11434	168.966	5.77422	0.467968	5.7941	0.0193255	5.28079	6.529	1.50038	21.7376	17.1404	10.5563	4.97757	0.0129119	5.81746	0.018571	96.1698	9.35818	9.88038	14.7848	35.7083	4.54613	2.55088	3.5668	4.82557	154.298	3.13557	1.17123	76.2681	1.0404	4.24746	9.49004	8.00579
TCGA-B0-4845	1986	1	8.95986	5.63403	119.823	8.08435	0.256614	3.18778	0.0196201	7.12806	6.71692	0.0666548	29.4253	12.437	9.85227	4.24436	0.0349565	2.11072	0.0754163	45.2356	12.2654	11.0787	16.4334	68.3989	2.71102	4.56473	6.58634	9.45076	66.2417	1.2133	1.79266	67.2224	1.35745	3.36524	14.8471	9.98637
TCGA-B0-4945	2145	1	8.78034	11.7697	141.565	6.63786	0.388359	4.41916	0.013532	7.21859	8.27477	1.32237	28.0817	11.0024	10.37	4.07918	0	1.91068	0.416117	64.0133	11.792	8.78286	14.3627	53.2459	4.78498	3.32401	5.72801	5.92562	127.99	4.97438	2.32323	72.9356	1.72033	0.561001	14.6947	7.08751
TCGA-CW-6093	3146	0	15.8762	7.49908	205.348	4.32288	0.550318	5.88193	0.0153402	5.99305	7.69184	0.684391	39.7516	17.4833	14.4852	5.79611	0	2.02275	0.0982752	89.9128	10.6385	5.00177	15.8856	46.7653	5.09255	3.29243	8.57583	7.15269	149.949	0.00638809	0.934407	134.92	1.38416	2.57504	13.6693	6.86354
TCGA-AK-3428	2223	0	5.94275	7.2262	402.126	3.73268	0.154805	5.48915	0.0836889	4.72467	5.79613	5.45632	52.2248	24.563	10.1414	2.64239	0.167744	3.38792	0	105.887	10.5747	7.44378	9.94261	45.2816	5.07069	4.02123	3.53971	4.43678	141.354	1.37877	0.50874	101.38	1.83657	1.13525	11.1504	4.51593
TCGA-CW-6087	41	1	9.26022	5.58626	5.65013	4.86535	0.567451	5.4275	0.00404936	7.62779	7.81841	1.20412	18.4556	7.50709	7.1416	8.64258	0.00360731	5.19349	0.015565	79.6136	8.98387	14.9343	22.7781	50.7572	3.18016	2.94886	2.04714	9.66695	118.853	0.037941	2.51827	90.9206	1.737	5.59916	14.3791	6.18321
TCGA-BP-4964	1862	0	6.99159	6.71648	339.738	4.95155	0.836891	4.90824	0	5.95046	5.15905	0.455557	26.7075	14.1588	9.6352	3.09861	0.00371934	2.69494	0.0320969	75.8304	9.57911	7.76604	9.20345	46.9869	3.07987	2.65871	4.89708	4.86444	84.7981	0.805858	1.67049	71.808	0.96769	1.49163	10.9279	6.38441
TCGA-B8-A54J	528	0	18.7211	5.69052	47.028	10.0576	0.367597	3.07752	0.00569268	11.7362	5.54614	0.444526	36.1193	23.6029	10.5102	4.15463	0	2.07966	0	61.9116	12.4725	10.6909	19.0738	77.9504	4.07493	3.44915	5.39799	8.52037	80.6417	0.835633	1.04446	76.4505	1.7379	2.72793	18.2794	9.56112
TCGA-CZ-5982	2042	0	10.356	7.51885	250.718	3.88706	0.149586	5.49625	0	10.724	5.25317	4.05377	35.0302	35.3393	15.1194	6.04581	0	1.0913	0.020681	119.414	10.2993	9.30709	19.3396	47.5822	4.85602	4.66985	6.01564	9.59617	147.313	0.332716	0.844425	114.42	1.03764	0.879094	14.2914	6.0317
TCGA-B0-5110	1092	0	14.9858	7.87621	45.4263	4.48733	0.593925	5.8201	0.0058996	6.37866	6.79912	0.460684	43.4943	21.0265	14.688	5.43629	0	3.75516	0.0680311	63.4738	10.6482	8.93598	15.2621	45.1091	6.96158	3.12628	4.48167	6.6153	172.826	0.0221108	1.17371	108.525	1.42861	1.40275	10.958	8.35435
TCGA-BP-4349	372	0	10.361	3.95928	468.22	6.83138	0.653184	3.03565	0.0206978	13.449	5.52418	2.61591	30.5115	13.9361	10.0992	4.41104	0.0138287	1.91933	0.218787	65.371	11.7163	8.78252	11.2797	75.5193	3.87529	3.62493	10.4083	7.77273	114.492	1.49327	1.14001	59.975	1.26196	0.73189	13.3865	9.22325
TCGA-CJ-5679	679	1	3.08512	2.78251	177.531	4.56547	0.0691319	1.31946	0	6.27971	3.16182	0.253164	41.859	2.28991	4.50019	2.97934	0	1.5323	0.0772935	81.5174	6.22581	8.1885	7.01587	42.8447	1.83754	3.93603	24.8407	7.57533	70.1838	0.355883	4.28205	47.9996	1.54196	1.7245	17.6822	5.15058
TCGA-BP-4995	1371	0	6.49145	5.33159	35.6421	4.78772	1.59497	6.72929	0.00366869	7.11157	6.37385	0.459135	15.2296	24.4884	10.1425	4.94013	0.0032682	3.97347	0.0423054	61.8075	12.6052	6.16622	15.8001	55.8045	5.75268	2.24882	2.28647	4.07765	80.8421	0.545405	0.740689	71.8714	1.37383	1.63725	13.5752	7.51792
TCGA-B0-4713	202	1	6.26238	3.45507	26.6094	4.29881	0.390489	1.39961	0.00763855	4.64737	5.01612	0.369791	18.8454	5.29824	5.93933	2.41035	0.0680469	1.43378	0	14.3178	3.9725	14.3741	8.46891	42.3002	1.54778	3.52644	2.65615	5.54728	50.1139	0.295824	1.18197	25.9502	1.36746	2.50546	13.8171	6.25324
TCGA-A3-3378	630	0	6.24504	6.58947	86.0527	6.13629	0.199566	4.41586	0.00520509	4.951	7.33079	10.7565	31.1073	8.62587	6.93724	6.41913	0.00927376	4.34844	0.0600225	36.8428	8.1223	9.09733	15.0239	39.0042	2.83665	1.89023	2.346	6.78924	99.1645	1.16397	3.19867	87.1177	1.50802	3.28128	8.96665	6.92376
TCGA-BP-4345	1516	0	14.3507	4.58938	32.7925	6.49719	0.719163	3.81122	0.0104139	10.7056	5.67103	1.20262	61.8048	5.50039	14.7329	4.10568	0.0231927	5.56368	0.200147	76.624	12.8563	8.88192	13.0328	65.8342	3.03765	2.833	21.4906	6.52779	119.629	3.9973	1.43109	169.412	1.61663	3.47292	12.927	6.32179
TCGA-B8-4148	379	0	9.15153	7.23558	554.594	7.53294	0.454048	4.2166	0.0655169	6.92511	5.29216	8.37348	12.5257	17.9527	11.4502	6.43481	0.0106118	2.96013	0.137365	74.3194	12.2272	11.8713	16.0351	55.9646	5.32442	3.8005	3.6802	8.80911	142.367	0.0148817	1.26833	63.337	1.7462	2.69437	14.1721	10.0656
TCGA-CW-5587	2226	0	11.5302	5.58929	59.4965	4.47339	0.104821	4.75642	0.00497344	3.35385	5.74015	0.747654	20.1912	14.2502	10.5784	6.12468	0.00443051	4.59799	0.0191171	27.2715	8.18102	9.91512	12.7648	49.6797	4.7358	2.29926	5.50087	7.16491	63.0494	0.0838787	0.960136	74.5563	1.37638	0.855066	12.0152	7.48369
TCGA-BP-4972	1502	0	13.6089	5.4234	19.1706	4.24117	0.219308	5.7054	0	5.37767	6.35366	0.461097	29.8443	14.2798	11.3416	4.68933	0	6.77839	0.0381053	72.3579	9.94514	7.23489	15.1103	43.4189	4.7286	2.24044	4.67136	4.20284	73.1251	0.0082564	1.02751	122.391	1.23171	3.86404	11.1563	8.25787
TCGA-MW-A4EC	498	0	11.5382	5.44383	284.537	6.05101	0.194862	2.58599	0.0063437	5.00008	4.23279	5.94245	14.4115	10.5128	10.137	3.08172	0	1.84475	0.0731523	33.7371	12.2025	5.3132	13.4766	72.7517	4.94001	4.50531	2.80828	10.5341	110.164	3.36816	1.21065	46.6132	1.37705	1.59343	17.6513	6.73395
TCGA-BP-4999	1266	0	13.4916	6.79546	1271.81	5.24796	0.512476	4.74322	0.0225188	15.2276	5.76294	7.60075	30.5117	15.352	13.7476	4.84685	0.00668684	3.08287	0.0432792	78.835	10.2036	6.09564	16.8251	48.0365	6.09883	2.19183	7.77023	4.23614	142.08	0.0797084	0.926431	129.019	1.14253	1.54222	8.01455	8.0082
TCGA-CJ-5675	2430	0	5.54303	5.27997	54.4323	4.77222	0.130529	2.52453	0.00515189	3.53828	3.42668	1.05014	12.7104	21.1166	7.03338	3.58221	0	5.6434	0.039606	69.82	6.62638	10.4022	19.8383	77.5939	3.00211	3.19447	1.59854	8.85164	99.6833	0.0611436	2.39156	40.1656	1.26537	1.87828	19.3324	5.43347
TCGA-CJ-4638	431	1	2.97919	3.89628	11.8854	5.15172	0.263797	1.2199	0.0248565	5.31415	4.37376	1.3449	8.09648	8.63035	5.4174	2.51016	0.022143	2.16802	0.127392	22.1775	4.85946	17.6949	9.32812	108.433	1.31676	4.02783	2.01678	5.47083	49.9093	0.538248	1.0745	15.5527	1.01751	4.6978	19.1315	7.48774
TCGA-CJ-4876	1955	0	3.66334	4.36	38.5305	10.8406	0.165932	2.08393	0	1.93513	7.31782	0.170438	14.8345	29.8674	5.35714	2.15164	0.0107199	1.03834	0.208146	38.6562	6.00973	11.1661	11.4862	102.002	2.70128	5.83049	3.33144	6.48024	142.061	0.142816	1.88863	29.758	1.05631	1.76075	22.7823	6.96152
TCGA-B0-4849	69	1	8.50066	7.15858	198.87	7.46448	0.277698	3.23722	0.0738202	12.1135	4.80782	2.74637	30.1839	23.8542	11.307	4.57741	0.0292274	2.42198	0.126112	75.1917	10.3995	9.10299	19.1848	83.326	4.66556	4.66865	4.93644	9.81878	158.131	0.0256173	1.34171	56.1884	1.42581	0.730094	19.218	8.47047
TCGA-B0-4818	510	1	11.0817	9.34539	261.11	10.6871	0.266322	2.68322	0.00509788	8.66417	5.76751	1.17055	18.7312	16.2103	9.92941	3.6204	0.00908273	2.82496	0.0783815	45.2163	11.2418	8.33984	19.6927	57.7916	3.84495	2.81633	4.30899	6.10761	116.575	1.31832	1.05177	63.8578	1.41082	1.35509	12.4272	6.9896
TCGA-B0-5077	1317	1	10.5601	4.90534	13.0769	6.0509	0.165394	2.87069	0	8.11891	6.46261	0.620184	28.0004	11.2325	10.8951	4.77724	0	3.39703	0.134222	28.1475	11.7784	7.38575	18.9265	51.5839	2.08393	2.41699	2.36425	7.17082	72.9225	1.50229	1.18356	65.0785	1.14001	4.06086	12.6963	9.56381
TCGA-CJ-4904	1792	0	13.6445	5.34661	463.305	4.56575	0.377355	5.08366	0	10.0081	5.85995	5.75862	41.0944	32.8921	10.889	5.06262	0	2.18002	0.0149404	72.4898	8.78703	9.41057	15.7155	41.1344	4.73067	4.16196	7.88075	6.7317	110.211	0.354473	1.00813	137.239	1.06559	1.80097	13.1415	5.29294
TCGA-B8-5550	434	0	13.1186	5.84425	129.949	4.71643	0.316368	2.95675	0.0144719	4.11883	5.3904	1.60184	37.4705	5.32439	13.2759	5.07503	0	3.1097	0.0834413	49.2754	8.5808	7.71989	12.2965	49.9623	3.01387	2.255	12.1743	8.14582	55.3442	0.461028	1.141	111.163	1.52067	2.69986	15.3992	6.3367
TCGA-B0-5690	2408	0	39.5744	5.42591	42.8757	6.42158	0.929598	4.79713	0.0175679	9.60289	4.81	0.400228	82.3213	14.7316	15.4703	6.26914	0.00521671	4.68221	0.0675281	101.858	10.6719	8.18187	19.5732	71.9958	4.52918	2.53004	10.2285	6.95536	76.0897	0.065842	1.05284	147.442	1.54466	2.70621	12.3202	8.39061
TCGA-CW-5591	2271	0	9.29066	7.37663	26.1109	5.62829	0.493327	5.30439	0.0116415	8.18363	6.64436	1.99609	9.68317	13.5329	11.4719	10.6247	0	12.0379	0.0447481	9.87476	11.3956	12.8541	16.0792	58.6265	3.63471	2.11756	9.83224	6.53264	82.0254	0.199974	1.13229	117.546	1.30884	0.723943	12.9457	6.75073
TCGA-CZ-5458	1558	0	9.13653	4.53514	420.688	5.56178	0.775432	3.71229	0.0046799	11.2523	5.7986	1.53261	24.715	24.5728	11.0984	4.0967	0	3.1204	0.0359775	70.6525	11.0495	6.84783	14.5427	55.2963	3.69085	2.22683	6.5657	5.10027	88.5412	0.95883	2.07935	99.903	1.78083	4.2056	13.4195	5.32998
TCGA-AK-3443	1423	0	2.08925	6.96872	89.47	4.44179	0.0962358	4.1182	0.0043355	13.3102	6.84758	0.0305407	4.01306	6.12139	10.3914	9.64526	0	2.23245	0.0833245	31.297	8.58618	4.59885	15.2056	94.7065	5.26808	1.52418	0.79438	4.3239	64.6612	1.64113	0.169313	19.7411	1.1211	2.48991	11.1477	6.60228
TCGA-BP-5006	840	0	8.10557	5.46931	166.863	6.00114	0.171723	3.55484	0.00885423	7.16338	5.1283	0.0995302	20.2379	12.958	10.5628	3.77842	0.0118315	1.66445	0.0850854	51.2161	9.99264	8.96592	15.7906	62.6076	4.83414	3.58598	2.90718	6.33865	169.242	0.602849	0.848142	77.6527	1.1869	1.77059	14.4091	6.36881
TCGA-A3-3322	1478	0	11.196	6.11078	67.5171	5.2786	0.230935	3.17999	0.0417558	4.97876	5.97783	2.60347	14.0188	16.7425	10.4746	4.73554	0.0247984	5.81004	0.107002	57.8241	11.9919	5.85507	12.0648	42.203	4.61755	2.4735	4.80269	7.581	66.1296	0.81725	1.25634	62.9739	1.13151	2.67301	8.93018	9.30113
TCGA-BP-4327	109	1	16.1084	4.04279	112.69	7.6812	0.393695	2.20132	0.0530303	5.1061	3.70264	2.94965	24.8589	11.5008	8.73771	3.46486	0.0262451	1.64744	0.158542	55.628	12.3556	6.13062	10.5419	71.6272	3.46866	2.63298	3.97174	9.16988	70.4433	1.94701	1.08107	53.2764	1.30453	1.72431	14.2921	8.76924
TCGA-BP-5173	62	1	8.46248	3.48216	28.0282	4.8311	0.126866	2.44231	0	5.26126	4.75787	1.22705	21.6477	10.5231	12.6422	4.19919	0	1.96955	0.13473	25.9334	8.3038	8.00264	14.3468	59.5974	3.41853	4.28484	3.23459	10.0839	60.0243	1.25736	4.80753	71.5071	0.922393	3.07111	10.4557	6.56584
TCGA-AK-3450	1508	0	5.50345	4.66509	665.099	5.77819	0.192806	3.00022	0.00577126	6.14296	5.15719	0.144454	17.9579	11.0486	8.44421	3.72655	0.0257062	0.840759	0.0221837	30.71	5.85289	9.53677	15.3115	72.324	3.69934	3.71973	2.61661	5.55989	129.85	1.46001	1.70951	51.7545	0.958307	0.865565	16.2547	5.96633
TCGA-BP-4763	1270	1	5.00821	7.72846	125.591	2.78328	0.38564	5.01072	0.115434	5.80232	6.81989	1.06229	24.4711	16.4294	12.9711	3.14396	0.102832	2.57421	0.0887416	143.545	6.49247	3.24362	16.1885	29.6945	5.32775	2.7835	7.83498	2.09576	87.2982	0.706627	1.0547	127.178	0.763708	1.31604	7.79862	3.51956
TCGA-BP-4770	329	1	9.38874	6.04869	2.32726	3.32522	0.527597	2.94246	0.159106	4.68588	8.59165	0.633822	58.9387	2.10061	7.84373	3.7538	0.00745985	7.8216	0.0160941	39.2252	7.52619	8.08252	12.9666	37.2194	1.41678	4.65318	41.4329	12.0021	94.7719	0.0104615	2.74888	47.9516	1.05735	5.36063	17.5009	2.41533
TCGA-CJ-4634	1820	0	15.22	7.7374	186.444	6.59569	0.331324	5.20061	0.0229994	4.7967	4.82239	1.59948	27.3106	26.0172	14.4544	5.76746	0	3.95302	0.0663044	59.5585	9.53049	8.6549	16.3008	53.477	5.27713	2.88774	7.74382	6.58035	85.9241	0.0143664	1.36423	89.3689	1.273	1.4022	11.6641	9.51355
TCGA-CJ-4889	1946	0	8.85847	6.28309	34.2614	6.53534	0.738407	4.38771	0	6.19591	7.52012	3.23193	19.2016	16.6361	8.76761	5.81768	0	5.06481	0.0613519	70.027	11.9987	7.43605	17.9566	63.1981	4.39326	2.53501	8.51025	8.238	115.466	0.01994	1.50539	92.9209	1.36197	2.46519	12.1041	7.9999
TCGA-B0-4814	168	1	7.21812	6.69229	117.778	6.14613	0.216551	3.75659	0.0186933	6.68282	5.73915	3.21454	18.937	21.7341	9.63046	3.51505	0.0111018	5.21607	0.071854	44.4639	6.23405	6.04215	12.1953	73.9803	1.67108	2.37917	3.00011	4.85628	67.7289	1.68922	1.50137	60.4183	1.17478	1.77789	13.9188	8.33302
TCGA-CJ-4894	841	1	13.4252	4.8105	18.5805	7.21255	0.230523	4.58584	0.00506471	4.35432	7.06892	1.43925	21.4451	34.6942	11.5948	4.36596	0	4.18576	0.116807	62.1443	8.88509	13.8706	17.759	52.3419	5.66451	3.11433	4.44352	7.51818	76.4317	0.484036	2.27272	73.1602	1.65131	5.07016	14.2155	7.92821
TCGA-B0-5707	2828	0	2.84217	4.29002	4.18713	6.39488	0.0963415	2.41757	1.77331	15.3255	4.89362	0.624589	4.92306	12.6226	5.01084	5.30402	0.0121517	3.18334	0.052433	11.5553	10.2345	36.0062	15.2461	68.7183	2.38464	4.90095	0.775351	12.7822	100.874	0.792418	2.63842	67.9988	1.48053	1.31399	26.3469	6.59984
TCGA-B0-5102	2764	1	5.13158	3.50024	38.7206	7.68726	0.0789912	2.39136	0	2.15817	5.33952	0.389422	17.6871	11.7931	8.45143	2.68755	0	2.25363	0.0188082	39.6976	9.98881	8.7021	13.325	84.9486	4.25428	4.91489	2.02868	8.14216	61.4295	0.672415	1.09605	29.2066	1.30337	1.67654	13.3833	6.26435
TCGA-A3-3362	1559	0	8.95435	5.50903	128.939	6.61051	0.316847	4.10844	0.00710123	9.14452	6.61554	6.54243	22.6655	15.8794	12.0745	5.24879	0.00632602	2.64993	0.0545918	34.5429	10.1511	7.54599	14.5413	49.0607	4.04869	2.78913	4.19783	6.71886	87.0934	0.00887145	1.11975	79.4374	1.15458	1.87896	12.2762	8.53393
TCGA-B0-4836	1238	1	5.12853	5.84997	229.526	6.9672	0.794121	2.38859	0.00670795	8.72989	3.66282	4.2568	27.8274	5.80927	7.78862	3.87864	0.0119514	2.46935	0.154705	184.976	8.80754	8.33404	10.5401	52.6424	3.10044	2.49214	17.3865	5.49525	89.9795	0.322635	2.92114	115.97	1.19506	5.27562	11.7022	4.93362
TCGA-CJ-4642	1628	0	3.51263	6.94851	67.889	8.19513	3.11048	1.67175	5.68558	4.00857	3.93772	1.20438	29.9245	10.625	10.4554	5.23096	2.43116	4.75728	0	34.0643	13.7012	8.26304	15.7088	83.8033	3.5139	4.44182	2.23051	5.63214	42.5043	1.98881	3.51907	19.707	0.655611	2.21844	6.99433	9.88207
TCGA-CJ-4908	1531	0	22.0669	6.08837	152.43	6.45442	0.899867	5.40929	0	10.5866	6.81952	1.33539	55.2874	19.0097	13.7535	5.79097	0	4.5808	0.103885	103.604	11.7411	8.05123	18.374	56.2509	4.27725	2.64218	11.145	7.11641	122.117	0.0112546	1.33425	136.381	1.46473	2.26287	11.8937	8.66309
TCGA-B0-4696	866	1	2.1248	9.36502	0.99151	4.02547	0.817071	4.58705	0.0223568	2.54981	5.23997	0.0658997	100.985	1.32638	5.72498	8.14509	0.0331937	23.7339	0	24.6889	31.1211	12.1598	25.9605	12.5871	8.73453	4.50088	18.2592	20.2877	88.0165	1.40581	4.17327	83.2659	2.99047	17.265	35.374	7.58553
TCGA-BP-4761	182	0	4.50267	1.95049	5.41797	6.70168	2.30071	0.594759	0.0112514	11.6365	1.43971	0.0775721	25.5855	5.14079	3.94443	1.62501	0.0400924	2.52169	0.194617	33.4516	4.5039	15.6034	8.94507	106.884	0.8121	3.15862	1.08344	10.0061	47.6003	0.0351403	2.79804	14.4218	0.666543	5.46024	29.2921	5.21062
TCGA-CZ-5454	722	1	4.88206	4.05338	116.275	2.57933	0.181413	3.56832	0	4.71052	5.30587	0.108684	35.2425	17.8695	7.8058	2.84114	0	4.88848	0.0293403	98.0585	7.33093	5.31259	8.11101	41.7775	2.07487	2.65645	2.01621	3.68991	143.609	0.0119199	1.92073	106.914	1.01661	0.758545	14.3725	3.71616
TCGA-A3-3351	910	0	11.4226	6.66779	118.687	6.78384	0.273241	5.45439	0.0134659	8.38126	7.08849	0.541904	22.9654	28.4468	11.6517	5.15631	0.00599794	7.92985	0.0258803	55.5506	9.1165	9.03226	12.4304	44.802	5.5463	2.18495	5.70904	6.87726	150.354	0.012617	2.03902	91.1319	1.38585	1.73225	10.6178	9.15935
TCGA-BP-4797	1107	0	7.50626	6.06693	37.6691	4.37457	0.56064	4.04066	0	5.39782	5.065	1.10573	27.1733	13.7753	10.9491	6.14853	0	3.16131	0	50.5605	8.278	6.31485	14.5342	51.8261	4.34462	2.08062	4.12735	4.54888	105.03	0.00800973	1.14326	79.4864	1.27531	2.0274	11.9555	4.42229
TCGA-CJ-4885	2125	0	4.65983	6.10526	53.8358	6.10794	0.635432	3.84005	0.00999662	5.98564	8.98995	0.56036	23.8255	20.0253	8.35231	2.92157	0.00890534	1.98002	0.0192126	110.827	6.67485	5.84439	11.7357	59.8705	2.81663	2.3011	2.58035	5.03412	51.7534	0.0374658	1.10121	76.1905	1.06771	1.8101	16.6869	5.70908
TCGA-B0-4827	885	1	14.1859	3.86245	32.2522	5.64483	0.140275	2.45222	0.00900184	5.65881	5.9684	2.68692	33.4927	3.17748	9.5524	5.55526	0.00400958	2.85984	0	46.5443	14.1946	9.04107	20.5483	76.2344	2.6049	2.77055	4.44851	8.39977	79.1745	0.261466	2.06284	76.9728	1.44803	4.01732	12.9554	6.29218
TCGA-BP-5180	2263	0	3.36376	5.3713	190.362	5.28626	0.100322	1.19444	0	2.92413	2.53002	2.70436	11.7964	12.878	6.50631	2.48966	0	2.87913	0.0362079	120.951	5.97673	4.8093	16.0844	54.9234	3.07514	2.99622	0.762192	5.26967	68.0415	0.105912	2.93252	41.3134	1.03868	2.38332	15.4609	6.43307
TCGA-CZ-5460	1430	0	7.65045	4.1478	131.908	7.99182	0.167152	2.59979	0	6.69461	3.63486	0.574641	22.0692	20.9985	6.80024	3.70491	0	2.30827	0	99.8312	12.0822	8.6436	7.62225	102.183	1.22774	3.12634	1.61859	7.10263	106.94	1.23978	1.24488	50.955	1.12201	2.56769	17.5602	6.01955
TCGA-DV-5574	723	0	11.6315	4.92033	49.8131	5.01354	0.79378	4.13355	0.00503596	7.81019	5.82932	2.27644	51.5638	8.70651	12.5211	4.76096	0	5.19755	0.0387147	98.3558	10.0409	3.98501	18.7305	54.94	3.26136	2.37031	12.4601	7.55479	158.61	0.245362	1.18743	112.689	1.37191	2.08778	12.4535	4.82749
TCGA-BP-4968	1746	0	8.1411	4.20033	28.5214	6.04649	0.219174	1.94378	0.0128621	7.94814	4.74011	0.451742	26.405	9.33454	8.9297	2.37214	0.00381935	2.49354	0	53.9367	12.3489	6.28764	16.1596	82.5758	2.3422	4.2071	4.39228	5.45511	85.3719	1.24263	1.54165	51.6438	1.16798	3.58102	18.7844	5.6642
TCGA-GK-A6C7	61	0	30.1104	7.265	105.959	7.4581	0.530473	4.03023	0.00506622	7.99894	5.84937	5.11328	38.9644	11.583	12.2374	4.35832	0	2.99477	0	57.2272	13.5768	7.65216	22.0751	54.8265	4.64299	3.04023	7.13479	7.14901	113.93	2.75634	1.82544	97.3461	1.73505	3.65704	16.3293	9.32509
TCGA-B8-A54H	256	0	22.0528	5.77478	41.9903	7.88941	0.314646	3.91941	0.188909	7.25544	5.91113	0.568296	31.3374	13.6253	11.4528	5.20371	0.629073	2.79236	0.0518668	49.5223	11.2985	8.17957	12.6633	73.1637	3.4192	2.91925	4.81843	10.2884	64.7773	1.45253	1.02077	79.4162	1.29533	0.71297	15.7205	8.03451
TCGA-CJ-4869	2554	0	10.5587	2.98651	31.0133	7.80956	0.413628	1.98296	0	6.09911	4.5002	0.830849	25.9164	12.0722	7.33964	2.78294	0	5.77778	0	67.0943	8.14627	12.4648	14.6842	98.1726	2.15504	3.95456	4.45563	7.95943	72.5041	0.829567	1.24576	46.4191	1.39944	2.67499	24.5363	5.2394
TCGA-A3-3306	1120	0	2.1599	8.62702	631.335	4.24517	0.0802169	3.5766	0.0077776	2.18212	3.8823	4.39121	9.30755	37.8123	8.18763	3.45903	0.00692856	0.758267	0	80.2891	6.98166	5.55997	19.9111	49.0247	1.93132	5.17812	1.33145	7.18278	100.103	0	5.0317	61.6157	0.955139	1.49839	13.1527	6.59972
TCGA-CJ-5686	2038	0	8.05103	5.97886	120.909	4.43582	0.254824	4.15711	0.00452797	5.93787	6.82267	1.4971	27.0241	14.2521	9.25581	5.24084	0.012101	2.90747	0	41.4682	7.45319	7.68312	16.3572	53.475	3.40911	2.91839	3.00974	6.68578	98.408	0.871134	1.58812	73.504	1.28051	1.10974	11.3347	6.35608
TCGA-BP-4781	2080	0	6.60754	5.83468	75.3811	4.79422	0.129318	6.71202	0.00554578	4.80586	4.34443	0.113874	30.9408	11.3037	9.05284	3.23599	0	3.64492	0.021317	64.7092	11.1332	5.27817	10.397	42.2217	4.10565	2.84238	7.24647	6.35772	231.671	0.609686	1.17687	91.3105	1.10792	1.81903	10.8125	5.43949
TCGA-MM-A564	607	0	11.8014	4.61553	13.1666	9.22154	0.449236	1.25829	0	10.3375	5.72147	2.03894	28.458	12.144	10.7768	2.53491	0	5.18551	0.122246	72.7501	8.31109	4.42323	9.99565	97.123	2.46397	3.5119	10.8675	5.8875	42.0475	0.412212	1.03695	45.8876	0.900773	1.12459	19.7293	5.74517
TCGA-A3-3374	1314	0	1.46384	1.68371	234.924	4.57825	0.851392	1.06535	0.03104	14.7366	2.32892	0.0519504	10.0773	9.04496	4.43155	3.87593	0.00921718	6.42634	0.0198854	24.608	11.6727	10.2746	6.59248	93.7776	6.40263	1.73879	1.0586	4.90751	72.808	0.901584	0.468868	19.2773	1.40486	2.31505	13.5595	5.97147
TCGA-A3-3382	574	0	6.19577	5.32099	451.913	4.33837	0.186448	3.62355	0.0234243	9.14403	6.26919	0.386191	34.8468	38.968	8.27178	6.04951	0.0156504	2.4445	0	142.566	6.64504	4.06752	13.1048	52.5826	4.90541	2.26615	8.80324	4.50637	121.384	0.0292636	2.39051	69.8676	0.952133	1.0211	10.4862	9.55592
TCGA-B0-4810	478	1	12.2228	5.14246	33.1291	7.36749	0.2993	2.22497	0.0100746	7.82481	5.9734	3.51448	56.9869	6.55068	9.39749	3.30337	0.0044874	3.73692	0.193625	56.6332	12.79	11.8941	16.4793	83.2417	2.68517	3.69102	7.55219	9.2942	72.1245	0.012586	2.16763	77.6698	1.79049	4.55135	17.398	7.50514
TCGA-CJ-4890	2085	0	7.17753	5.17228	118.063	5.48397	0.589001	4.23382	0.00936528	6.39997	6.22518	1.56158	35.1165	4.99873	8.49769	4.57434	0.00417146	9.67629	0.0179993	49.4423	9.95867	8.18199	17.0496	49.6207	2.98293	2.46331	11.4043	5.88199	140.321	0.836542	1.67688	97.5721	1.19466	2.40379	12.91	4.86661
TCGA-A3-3383	861	0	5.07393	2.99474	116.756	8.08285	0.19049	1.44529	0.00745255	6.03169	3.1441	0.680245	20.3707	13.2109	5.38589	2.11893	0.00663899	3.25289	0.085939	64.2181	9.00678	8.07405	9.21724	86.533	0.606999	3.79086	1.7941	5.17753	70.827	0.847242	2.4162	20.2364	1.57908	6.12475	25.7399	5.95371
TCGA-B8-A54D	830	0	8.6753	6.26765	57.3396	7.59447	1.3907	2.82384	0	6.47221	9.25737	0.160899	13.9653	15.2509	5.76332	4.6694	0	4.95312	0.356605	31.6598	7.69702	13.6644	10.1204	87.6705	3.01899	3.07209	1.77253	6.51439	102.562	0.819581	2.04102	39.1236	1.71929	7.87007	12.3246	6.91794
TCGA-B0-5698	2583	0	5.61376	5.95767	50.8985	4.30878	0.0971191	3.79117	0.00973379	8.74089	4.78066	0.167044	41.0444	28.3433	8.38888	4.34006	0.0086712	3.70867	0	89.8176	7.75291	5.8423	20.4641	59.073	3.13898	4.06442	1.5752	6.06315	281.321	1.32851	0.821224	73.8067	1.14907	1.97022	17.4771	4.03366
TCGA-CJ-6030	2299	1	6.60417	6.74302	64.5045	4.22348	1.57802	3.97394	0	5.7308	6.88897	0.319347	34.3566	18.1903	5.4826	3.23528	0	6.11236	0.0370588	55.4831	7.44976	9.47613	18.2243	51.0239	3.24316	3.11629	3.52013	7.43326	107.82	0.228845	2.9446	83.4107	1.60506	1.50474	14.8821	2.97131
TCGA-BP-5195	749	0	10.599	6.39547	81.5334	5.63435	0.699088	3.75291	0.00466061	8.96478	5.17834	2.72148	37.7935	17.854	11.6013	4.90728	0	3.25117	0.0179146	128.432	8.46035	5.68044	12.8136	60.1561	4.16017	2.22966	5.91532	5.96669	90.1614	1.47599	1.36679	116.091	1.1568	1.73895	13.4887	7.28669
TCGA-A3-3319	1130	0	4.10751	5.43022	79.3554	3.47469	0.123065	3.08056	0	4.30395	3.96664	0.151925	13.7323	4.78513	8.03859	5.52125	0	2.06845	0.0680574	36.0405	5.40763	12.8974	7.77485	23.5101	2.25987	2.35702	0.580158	5.91295	68.8389	0.594458	2.681	63.4252	0.968511	5.44046	13.1279	8.31992
TCGA-AK-3454	874	0	11.6712	3.55581	18.7326	8.13043	0.631211	1.47174	0.0615348	8.19203	4.28777	0.398887	59.121	5.49447	6.65897	3.479	0.534469	5.55103	0.650455	45.1107	10.4485	10.903	7.30433	93.7869	3.00511	2.9914	7.40683	7.08467	72.7199	0.153749	2.26707	35.7112	0.997826	2.64487	14.0069	8.2748
TCGA-MM-A84U	700	0	6.50595	4.26322	25.9	8.77088	0.170185	1.40284	0.0368461	4.14425	5.21581	1.07026	23.1379	6.88956	7.39111	3.29225	0.0131295	3.63768	0.028326	70.1447	8.96853	13.8951	12.5049	104.444	1.78599	3.68204	3.7649	6.7041	59.3066	0.777927	1.75387	49.9356	1.26826	2.78552	16.8637	5.86489
TCGA-BP-4782	354	0	7.36575	5.52622	205.982	5.33479	0.647087	3.35408	0	6.82779	5.70427	0.773456	32.1736	13.544	9.73719	5.74959	0	2.10699	0.0206197	52.7298	12.1609	10.1249	15.8819	69.184	2.95542	2.41781	4.64902	6.40311	85.9166	0.113927	1.18976	97.1617	1.50777	1.03347	12.8098	7.65971
TCGA-BP-4774	1885	0	13.0779	5.59096	223.391	8.0354	0.369816	3.26138	0.0258525	9.3698	5.25576	0.386702	25.6439	11.6443	11.5844	3.83864	0.0322424	1.83095	0.119247	35.2178	11.7328	13.509	14.4052	71.6253	4.12912	3.47901	3.70652	7.10282	257.136	0.0290674	1.11247	55.7629	1.47564	1.60767	14.5375	9.26162
TCGA-CJ-6028	1625	1	8.45805	6.53911	85.1019	3.70071	0.442089	5.08251	0	3.97065	6.97326	0.525034	37.6444	13.8214	8.09902	4.97917	0.00603603	4.93922	0.0520892	116.695	9.89878	7.42707	14.0516	45.387	3.90796	1.78873	4.37693	4.52394	145.92	1.86225	1.29808	79.0779	1.04305	2.04894	9.11408	5.00762
TCGA-BP-5200	1063	0	12.9804	6.37088	140.07	5.66136	0.236064	4.33424	0.0037468	5.66168	5.68202	0.467226	37.2064	10.8832	9.23423	5.01984	0	2.05528	0.0288041	52.1645	10.5439	8.06902	18.4229	45.2208	3.78611	3.6477	5.44702	6.44488	186.781	0.0538294	1.35003	104.026	1.17625	2.06958	12.8817	7.07029
TCGA-CJ-4643	1793	0	14.2894	6.31299	667.956	6.183	0.758819	5.63306	0.0105431	9.34307	6.94356	3.05453	24.4125	21.3867	12.6573	5.7298	0.0046961	3.07776	0.0405261	63.3109	10.2007	10.3976	13.4439	58.7313	5.29895	2.99375	9.31348	7.24426	123.804	0.0329285	1.0643	111.715	1.42698	1.3177	10.2651	8.73667
TCGA-CJ-4912	1657	0	5.73885	3.77266	161.883	7.33353	2.28194	2.00385	0.0341757	4.47322	4.18545	1.14226	20.2414	6.70595	11.9363	2.70077	0	2.45489	0.131366	53.394	6.8421	10.5788	14.8775	55.8612	2.56631	3.49441	1.89229	8.53872	62.8259	0.200667	1.81311	34.819	0.904423	1.86689	17.5002	6.60659
TCGA-B0-5098	1584	1	1.76593	3.55684	5.05706	3.50197	0.419979	8.82012	0.0556371	4.72737	9.92504	0.066711	10.9643	3.63128	8.94618	3.44097	0.0371726	3.19533	0.374254	57.5444	8.06275	21.7134	18.3225	34.994	1.60876	6.29901	0.477467	22.7323	112.753	0.0289611	4.48562	50.9753	1.19089	7.09498	18.248	10.5278
TCGA-A3-3363	319	0	2.74319	5.26275	8.7506	4.09446	0.0952307	2.98597	0.00488197	8.30937	8.29414	0.0241464	2.3735	11.4455	6.51743	4.08425	0	5.37234	0.168889	4.6831	11.4531	8.56483	22.2003	75.9725	3.22306	4.16188	0.979389	6.63199	69.0789	0.0579402	3.5181	52.842	1.38907	1.25008	15.9606	5.48107
TCGA-AK-3460	951	0	7.94774	6.18208	765.642	4.466	0.269027	3.09628	0.0771344	11.9589	6.2434	3.27173	21.2861	18.3526	9.6714	3.29365	0.122158	2.05531	0.0329435	85.7123	8.37769	4.74371	16.4942	63.4328	3.87051	3.04615	7.62248	5.50721	102.115	0.0374744	1.43353	80.4165	0.948743	2.34087	12.0069	6.16472
TCGA-B2-4099	374	0	3.93417	4.73839	80.8604	4.95717	0.128995	2.34695	0.012112	4.50206	4.77738	6.08776	14.7703	10.552	9.10832	2.13975	0.0107898	2.73155	0.0465566	58.4101	7.04743	7.19258	19.565	59.9213	2.61865	4.42577	3.08589	4.38311	77.2047	0.00756568	2.31148	47.1621	1.07891	2.13407	17.7698	4.75827
TCGA-B0-4700	1980	1	7.31218	4.26383	37.7094	5.66759	0.542125	2.39158	0.0120895	6.68598	4.47492	0.430341	71.2277	4.71502	8.12207	3.18004	0.0107697	3.84076	0	156.577	9.64737	16.8141	11.9587	66.9307	1.96933	4.15286	9.77399	8.18479	103.63	1.30265	2.1691	60.7318	1.44807	4.12014	18.4118	5.23545
TCGA-B8-A54K	469	0	10.8659	5.4539	197.692	8.57421	6.10392	2.97025	0	12.7886	5.97038	1.42625	17.3008	9.00468	9.97172	4.06547	0	2.13493	0.0748519	37.8502	12.0672	10.1198	11.8092	59.754	6.14655	2.119	4.85287	8.24945	122.799	0.551426	1.07615	92.479	1.29677	4.49562	10.4885	8.89625
TCGA-A3-3370	2274	0	8.73718	6.12802	848.621	5.02378	0.36336	4.83152	0.032091	7.23682	6.26958	2.91714	16.8234	15.2758	10.803	5.65413	0	3.08372	0	31.8184	11.8171	8.99464	12.7467	45.567	5.26471	2.99869	6.74368	7.26115	125.418	0.0175397	1.33895	68.4806	1.31829	3.282	9.08707	9.40578
TCGA-B2-5636	265	0	22.4638	6.66287	53.371	7.16319	3.75971	5.65707	0	7.86236	6.75859	3.09227	39.6044	20.5823	13.4017	6.46863	0.0052784	3.061	0.0455512	53.0819	12.6823	5.93288	15.8747	63.7302	7.37242	1.81601	9.41436	7.1105	88.3256	1.2769	0.742213	118.142	1.66541	0.541864	11.9839	10.4656
TCGA-BP-4167	2718	0	4.50305	2.99585	14.3672	5.82072	0.289799	1.95753	0	5.4751	4.0825	0.847778	33.266	6.18367	8.554	2.48823	0	7.54068	0.179264	51.9202	8.38342	6.85649	7.8541	84.1749	1.97205	2.93423	8.61643	3.80581	82.8793	0.00416163	1.3402	60.7406	0.73176	5.62162	17.8911	3.50688
TCGA-CZ-5464	1492	0	10.5757	4.43588	63.2004	5.44238	0.33353	3.31964	0	7.85628	5.8309	0.885861	33.4689	7.56461	10.3044	4.13971	0.00393223	3.77666	0.0678682	50.4715	9.00616	7.9273	10.5657	70.0266	3.01647	2.70289	3.38272	4.76933	69.4765	0.419099	1.35304	75.3938	1.44682	3.99903	14.7633	4.52089
TCGA-A3-3323	1106	0	14.033	6.42134	247.517	4.94295	2.62838	4.97016	0.0428094	7.33698	6.54446	3.71394	36.3206	20.1109	10.4362	5.44258	0.0444921	6.13254	0.0274253	117.494	10.8196	5.49779	13.6091	37.5547	4.7813	1.92949	4.95249	5.26928	79.8393	0.815586	2.00829	98.9561	1.51177	1.36588	9.25944	9.95091
TCGA-CJ-4641	1661	1	8.50923	6.01892	46.8317	5.52205	0.437051	3.89196	0.0366632	5.04817	7.31832	1.96815	25.4795	12.6348	8.10598	4.99665	0	5.42669	0.0939513	98.7747	7.73909	12.4761	15.2844	58.2959	3.38674	3.18691	4.51931	7.0773	107.544	0.00381689	1.88204	65.6868	1.71749	3.14423	14.7325	6.53506
TCGA-BP-5199	1355	0	10.9193	4.75963	13.0236	7.34442	0.43621	2.94585	0.00463216	9.02244	6.31457	4.90847	41.0575	7.94938	12.7753	4.45154	0	7.74739	0.124637	80.2352	17.7483	8.71236	15.4147	110.225	3.63173	3.41205	12.093	8.59455	114.626	0.0231475	1.43353	70.4987	1.59842	3.26464	18.5686	7.48119
TCGA-BP-4762	1343	1	6.50157	5.6493	54.7135	5.07097	0.363187	6.7805	0.0160379	7.0937	6.46358	2.88931	24.4447	16.2541	13.4806	4.21528	0	5.15506	0.0205489	47.7045	12.7726	5.86745	19.9271	58.8917	5.75958	2.35444	11.8186	4.40315	94.5804	0.0166965	1.2684	157.249	1.13735	2.28148	12.0844	5.70417
TCGA-A3-3352	561	1	7.88821	6.02633	238.529	5.62685	0.279574	4.05681	0	4.83668	4.37986	0.248998	22.7771	20.8859	9.7373	4.14778	0.00326702	2.27267	0.0704837	63.351	9.22238	9.1266	16.3509	51.8972	1.86263	3.43341	4.20343	5.82466	61.6129	0.00458158	1.60785	66.034	1.164	1.94074	12.4439	7.36626
TCGA-BP-5184	1133	0	7.55792	5.92764	169.01	4.18876	0.334755	4.54307	0.0201759	6.22128	5.12643	5.72032	20.1789	17.3684	13.2142	3.38396	0	3.22562	0.0517018	75.3293	11.3478	7.12748	19.9989	53.2822	5.03677	2.373	7.42952	4.54323	114.635	2.52054	1.23392	66.2686	1.20978	2.50932	12.6713	6.10176
TCGA-B0-5094	333	1	4.0381	7.24673	21.673	5.40165	1.89772	3.19022	0.0152594	5.3223	6.2465	0.455128	17.6485	7.66372	6.54529	4.36293	0.0181248	3.69644	0.175963	116.285	5.41431	8.10036	4.83436	47.7086	3.24691	2.1157	2.00001	7.66059	61.5877	0.0794305	2.55233	54.9599	0.998561	2.62349	11.856	9.01058
TCGA-B0-4697	578	1	8.86691	4.89449	18.6661	7.24518	0.832296	2.19907	0.0367531	7.20213	5.29267	0.484751	45.5003	3.92194	6.0444	5.33594	0.0327409	10.0906	0.282545	38.3061	11.406	20.6027	11.244	124.302	2.26336	4.42529	4.76798	10.5697	109.027	1.60703	2.92477	32.7125	0.794633	3.29386	18.3604	8.78017
TCGA-B0-4837	1378	1	9.3133	4.71856	76.5132	8.11284	0.313389	2.35071	0	14.8177	4.51724	0.206893	52.701	4.3396	8.94586	3.94324	0.0102904	2.53069	0.0222009	87.9647	9.27962	6.17016	9.61713	68.1376	1.91229	2.778	16.1057	6.57585	53.8664	1.42506	2.29387	78.6008	1.21879	2.04938	13.0699	5.75695
TCGA-B8-5159	240	0	9.32994	7.05613	1243.52	4.74082	0.109514	4.20308	0	3.72745	4.02048	0.34647	14.4452	24.5165	9.30669	4.31687	0	1.47926	0.0323701	22.7867	11.2541	8.15602	13.5311	42.8535	4.70653	1.88426	2.28636	6.01216	98.5592	0.00263016	0.986625	70.2772	1.02691	3.26536	11.8848	5.70383
TCGA-BP-4971	1487	0	12.6866	4.56612	9.79166	6.55521	0.867652	2.40873	0	8.34254	6.44461	3.04766	22.9894	5.84025	12.9204	4.15865	0.0119147	5.05094	0.257051	53.0729	8.36604	13.8464	10.9078	62.66	3.52489	2.92225	11.9132	8.36617	95.6101	1.0081	1.84618	71.7247	1.52683	1.63627	12.2751	10.9332
TCGA-B0-5706	2414	0	12.2779	6.1064	37.2546	4.55172	0.329521	3.55344	0	3.78916	5.45482	0.991232	39.6693	8.62821	9.61439	4.4455	0	3.41282	0	78.5299	10.0328	4.59239	13.2822	51.2963	2.37891	2.55499	12.4268	7.35963	206.627	3.44767	1.44389	93.5409	1.15804	2.01105	9.9716	5.073
TCGA-A3-A8OW	323	0	20.3145	5.9068	352.262	7.4863	0.429381	3.6147	0.018775	13.2566	6.22146	0.427727	37.7749	16.1924	12.6526	5.33186	0.00557515	2.125	0.096224	59.3649	10.3613	8.74995	17.7066	69.3897	4.87768	3.0867	3.67445	6.29394	101.869	2.44717	0.830054	68.9599	1.81858	1.69409	16.145	10.6726
TCGA-AK-3434	2087	0	9.50913	4.8313	724.28	4.87631	0.355316	2.82659	0.0316944	13.3829	3.70087	5.80611	29.0181	24.9715	10.2401	2.65195	0.0282344	2.16655	0.0609139	130.203	7.67385	5.612	11.2543	65.9983	2.57621	2.52542	11.0847	4.11299	83.2152	0.984932	0.659743	76.8571	1.03474	3.71969	14.3712	5.22971
TCGA-CZ-4865	166	1	6.83773	6.01864	27.2571	4.94828	2.75093	3.23218	0	6.3857	6.4789	7.62799	34.7129	13.5498	11.3617	4.70724	0	2.8835	0.0533192	88.5912	12.3807	10.3335	14.5503	62.1287	3.65808	3.38505	8.38546	4.99931	76.4091	0.69967	1.33384	91.8178	1.99141	2.67662	16.962	3.42612
TCGA-B4-5378	175	0	11.691	6.7046	537.248	6.66473	2.33615	5.33952	0	17.9404	6.41781	2.1824	28.6692	13.1615	12.4138	4.59659	0	2.35185	0.0178476	50.1295	11.6877	7.39002	14.7581	49.5261	7.20385	2.46048	7.61332	6.18194	297.639	0.290032	0.831372	144.242	1.35325	2.03251	10.834	6.7701
TCGA-BP-4973	1384	0	8.44297	5.67754	215.639	5.39012	0.250288	4.24397	0	7.76379	6.50358	0.75955	25.1161	27.3746	9.09413	4.568	0.00344094	2.90226	0.118777	79.9272	7.87671	6.06383	11.5051	40.9176	3.04884	2.25079	3.10989	6.68208	110.133	1.32218	1.0303	75.9585	1.25269	1.41294	10.8461	8.14744
TCGA-CZ-5468	59	1	6.71115	4.60175	27.3622	3.84552	0.420716	2.44699	0	11.2488	3.82755	0.00522187	108.414	1.15538	9.27099	4.28676	0	1.99397	0.038263	107.219	9.07043	15.0401	10.5777	42.3112	1.51278	3.24318	22.5593	4.94429	60.7547	0.363749	1.26159	78.4741	1.56682	3.95084	24.5439	4.56491
TCGA-BP-4960	2172	0	11.9223	3.50957	17.8893	5.1066	1.31441	1.50693	0.00980315	6.04056	3.99502	0.462827	50.8749	6.02483	5.93507	2.70085	0.0130995	2.89745	0.0565224	54.7407	7.49723	12.198	8.45752	51.3082	1.46707	2.86568	5.80816	7.22055	72.7309	0.257185	2.39816	39.986	1.23356	1.67944	15.5904	7.24104
TCGA-BP-4326	1625	1	10.1019	4.48517	33.5481	6.60197	0.140211	3.32654	0.0145429	11.7189	5.15683	1.08475	109.45	4.10166	6.85054	3.98104	0.0215921	1.25215	0.130434	80.0456	14.7724	4.14478	6.2565	62.5252	2.26306	2.43149	8.25975	7.47737	213.608	2.377	1.72881	111.645	1.20741	2.78994	8.92168	7.00567
TCGA-BP-5007	1140	0	8.43073	4.98854	448.3	5.75862	0.255055	3.29649	0.0137055	10.9731	5.53322	0.422474	28.7307	20.4334	10.1067	3.62871	0.00813954	1.85327	0.140484	75.0539	10.8326	6.19115	13.82	71.9626	4.31087	2.48562	4.42975	5.43065	97.4098	0.00285367	1.11423	76.0383	1.33543	2.10566	13.1333	7.45107
TCGA-B8-4620	226	0	4.72391	6.16348	1030.33	4.7209	0.734909	5.26506	0.0164434	8.07778	4.72432	0.125691	84.4412	8.9982	8.23151	2.83799	0.00488278	1.36665	0.0210685	110.751	9.68155	7.77193	8.56766	43.4629	1.40825	3.38803	7.3819	5.07273	244.699	0.900444	1.70434	105.613	0.943313	2.07852	10.9793	6.18534
TCGA-B0-4712	1337	1	3.6773	4.74337	4.41883	4.53495	1.58696	2.60119	0.00529783	6.78596	3.68707	0.481981	64.5991	2.6094	7.29969	2.63768	0.00471949	1.35657	0.122184	163.318	6.859	7.72701	8.00453	52.4775	2.17504	3.33272	4.9173	3.95688	87.3036	0.334234	2.09627	69.2514	1.59445	4.94824	25.7649	4.20617
TCGA-B0-5694	480	1	8.57846	4.7677	30.7698	4.74173	0.74362	2.8606	0	5.25975	4.03413	0.476082	39.2148	12.9577	7.86728	3.34876	0	1.93682	0	81.9408	7.98488	5.6096	11.7503	55.025	3.52109	2.75206	3.57143	5.17891	67.0046	0.121577	1.24484	62.8038	1.21868	1.18662	13.4778	6.04011
TCGA-B8-4153	405	0	8.28409	4.22546	52.7325	6.69185	0.188045	2.06311	0.0204557	6.22272	3.67714	7.31727	22.9278	15.8147	8.13057	2.64614	0.00607422	2.13948	0.104838	94.3293	8.39532	7.66389	10.5804	93.5755	2.05439	3.41569	4.12193	5.49192	80.4606	0.0127775	1.07518	43.0123	0.937612	1.20555	13.8901	4.64633
TCGA-A3-3307	1436	0	6.65859	6.72542	699.994	5.3166	0.325267	4.40525	0.0366338	11.1806	6.36153	5.763	21.5645	25.3895	11.6363	3.90248	0.0195808	1.75705	0.112651	87.999	10.7299	9.61452	21.2913	49.9225	4.29857	3.23154	6.00678	5.92648	99.4313	0	1.44684	72.4147	1.30531	1.59915	13.7601	7.24465
TCGA-CJ-4900	1714	1	5.86205	5.63012	14.4229	7.37881	0.45974	2.43386	0.0134017	4.18106	4.98893	0.630712	36.5563	10.7551	5.53315	3.18433	0.0238773	5.82703	0.128784	76.2175	7.69704	14.0703	14.782	70.2619	2.14759	5.50104	4.60639	9.12263	104.107	0.0125568	2.41935	49.2033	1.09527	3.52968	18.2057	5.76694
TCGA-B8-4151	280	0	3.18448	4.94467	766.351	4.61566	0.112086	2.8371	0.00675549	8.30845	5.46896	0.167064	13.3769	16.2709	9.77025	2.2746	0	0.738105	0.103868	55.8073	7.14472	10.3854	16.6165	64.5073	2.61245	3.90606	2.39426	4.77635	107.952	0.0337581	0.851191	49.344	0.981519	1.0626	14.1634	5.15212
TCGA-AK-3458	1168	0	2.14608	4.55601	623.722	3.6919	0.230038	1.90842	0.0293136	15.2406	5.49641	1.49489	7.01659	15.5674	5.27501	1.76066	0.0391704	1.36325	0.0845074	59.8882	3.61884	3.98707	18.0138	88.3634	2.32447	3.06711	5.06721	1.83892	61.0967	0.0686645	2.14915	36.7178	0.526042	2.93094	16.4144	3.34861
TCGA-B0-5085	770	1	7.68432	3.40027	15.4197	6.73489	0.385135	0.984438	0.0168955	4.81737	4.03132	0.306408	12.1387	5.8214	6.52288	2.58556	0.0100341	1.96592	0.129887	19.6728	8.01673	15.0784	8.44487	91.8499	1.52156	2.77045	1.4763	5.50317	49.7248	0.193484	0.883903	11.4923	0.657533	1.15368	18.9592	8.64134
TCGA-BP-5168	1463	1	8.73364	5.94253	49.9735	5.33253	0.18368	3.34707	0.0387032	6.2761	4.42938	0.685465	44.7317	18.2205	13.3778	2.95655	0.0229855	3.62513	0	68.4513	9.52252	7.56679	13.0458	59.9715	3.58373	3.3767	4.65863	5.46845	113.839	0.0241757	1.07894	72.2863	1.04321	1.68319	13.5241	5.39752
TCGA-B2-3923	362	0	3.32426	3.82994	18.573	7.50957	1.35254	8.50462	0.0682395	15.1339	5.31402	0.412177	5.17025	11.4499	11.4212	6.45646	0.018237	4.30528	0.0262301	75.5771	14.5667	4.06359	13.0884	104.35	5.72971	1.5598	1.52413	4.02567	32.3193	0.0255751	0.30169	24.7835	1.57572	1.83887	16.1295	7.67072

## Sheet: survival landscape
	ACC	BLCA	CHOL	COAD	DLBC	ESCA	KICH	KIRC	KIRP	LAML	LIHC	LUAD	LUSC	MESO	OV	PAAD	PCPG	PRAD	READ	SARC	SKCM	STAD	TGCT	THCA	THYM	UCEC	UVM
ANKRD13C	1	NA	NA	NA	NA	NA	1	-1	NA	NA	1	NA	NA	NA	NA	NA	NA	NA	NA	NA	-1	NA	NA	NA	NA	NA	NA
TSC2	NA	NA	NA	NA	NA	NA	NA	NA	NA	NA	NA	NA	NA	NA	NA	NA	NA	NA	NA	1	NA	NA	NA	1	NA	NA	-1
PIK3CA	NA	NA	NA	NA	NA	NA	1	-1	NA	-1	1	1	NA	NA	NA	NA	NA	NA	NA	1	NA	NA	NA	NA	NA	1	NA
PTRH2	NA	NA	NA	NA	NA	NA	1	1	1	NA	1	NA	NA	NA	NA	NA	NA	NA	NA	NA	NA	NA	NA	NA	NA	NA	1
AES	NA	-1	NA	NA	NA	NA	NA	NA	-1	NA	NA	NA	NA	NA	NA	NA	NA	NA	NA	NA	NA	NA	NA	NA	-1	NA	NA
AKT1	NA	NA	1	NA	NA	-1	NA	NA	-1	NA	1	NA	NA	NA	NA	NA	NA	NA	NA	1	1	NA	NA	NA	NA	NA	NA
ITGB1	NA	1	NA	1	NA	NA	NA	NA	1	NA	1	1	NA	1	NA	1	NA	NA	NA	NA	NA	NA	NA	NA	NA	NA	NA
BMF	NA	NA	NA	NA	NA	NA	NA	NA	NA	1	1	NA	NA	NA	NA	-1	NA	NA	NA	NA	NA	NA	NA	NA	NA	NA	NA
CHEK2	1	NA	NA	NA	NA	NA	1	1	NA	NA	NA	NA	-1	NA	-1	NA	NA	NA	NA	NA	NA	NA	NA	NA	-1	NA	1
SIK1	1	NA	NA	NA	NA	1	NA	NA	NA	1	NA	NA	NA	NA	NA	NA	NA	NA	NA	NA	NA	NA	NA	NA	NA	NA	NA
ITGA5	-1	NA	1	1	NA	NA	1	1	1	NA	1	1	NA	1	1	NA	NA	NA	NA	NA	NA	NA	NA	1	NA	NA	1
NTRK2	1	1	NA	NA	NA	NA	NA	-1	NA	NA	NA	NA	NA	NA	NA	NA	NA	NA	NA	NA	NA	NA	NA	NA	NA	NA	NA
CRYBA1	NA	NA	NA	NA	NA	NA	NA	NA	NA	NA	NA	NA	NA	1	NA	NA	NA	NA	NA	NA	NA	NA	NA	NA	NA	1	NA
PTK2	NA	NA	NA	NA	NA	NA	1	-1	NA	1	1	NA	NA	NA	NA	1	NA	NA	NA	1	NA	NA	NA	NA	NA	1	1
CEACAM5	NA	NA	NA	NA	1	NA	1	NA	NA	NA	NA	NA	NA	NA	NA	NA	NA	1	NA	NA	1	NA	NA	1	NA	1	1
IKBKG	NA	NA	NA	NA	NA	NA	NA	1	NA	1	NA	NA	NA	NA	NA	NA	NA	NA	NA	NA	-1	NA	NA	NA	NA	NA	-1
ZNF304	NA	NA	NA	NA	NA	NA	NA	-1	NA	NA	NA	NA	NA	NA	NA	NA	NA	NA	NA	NA	NA	NA	NA	NA	NA	NA	NA
TLE1	1	NA	NA	NA	NA	NA	NA	NA	NA	-1	NA	1	NA	NA	NA	NA	NA	NA	NA	NA	NA	NA	NA	1	NA	NA	NA
MTOR	1	NA	NA	NA	NA	NA	NA	NA	NA	NA	NA	NA	NA	NA	NA	NA	NA	NA	-1	1	NA	NA	NA	NA	NA	NA	NA
MYBBP1A	NA	NA	NA	NA	NA	NA	1	1	1	NA	1	NA	NA	NA	NA	NA	NA	1	NA	NA	1	NA	NA	1	NA	NA	NA
BCL2	NA	NA	NA	1	NA	NA	NA	-1	-1	NA	NA	NA	NA	NA	NA	-1	NA	NA	NA	NA	NA	NA	NA	1	NA	NA	NA
NOTCH1	1	NA	NA	NA	NA	NA	NA	-1	NA	NA	1	NA	NA	1	NA	-1	NA	NA	NA	1	NA	NA	NA	NA	NA	NA	NA
BRMS1	1	NA	NA	NA	NA	NA	1	1	NA	1	NA	NA	NA	NA	NA	NA	NA	NA	NA	NA	NA	NA	NA	NA	NA	NA	NA
TFDP1	1	NA	NA	NA	NA	NA	1	-1	NA	NA	1	1	NA	NA	NA	NA	NA	NA	NA	NA	NA	-1	NA	NA	NA	NA	1
STK11	NA	-1	NA	NA	NA	NA	NA	1	NA	NA	NA	NA	NA	NA	NA	NA	NA	NA	NA	NA	NA	NA	NA	NA	NA	NA	NA
MCL1	1	NA	NA	NA	NA	NA	NA	NA	NA	NA	NA	NA	NA	NA	NA	NA	NA	NA	NA	1	-1	NA	NA	NA	NA	NA	1
MAP3K7	NA	NA	NA	NA	NA	NA	NA	NA	NA	NA	1	1	NA	NA	NA	NA	NA	NA	NA	NA	NA	NA	NA	NA	NA	NA	NA
E2F1	1	NA	NA	NA	NA	NA	1	1	1	NA	1	NA	NA	1	NA	NA	NA	1	NA	1	NA	NA	NA	-1	NA	1	NA
SRC	NA	-1	NA	NA	NA	NA	NA	1	NA	1	1	NA	NA	NA	NA	NA	NA	1	NA	1	NA	NA	NA	NA	1	NA	NA
CEACAM6	NA	NA	NA	NA	NA	NA	1	NA	1	NA	NA	NA	NA	NA	NA	NA	NA	NA	NA	NA	NA	NA	NA	NA	NA	NA	NA
CAV1	1	NA	NA	1	NA	NA	NA	NA	NA	NA	NA	NA	1	1	NA	1	NA	NA	NA	NA	NA	NA	NA	NA	1	NA	NA
DAPK2	NA	NA	NA	NA	NA	NA	NA	NA	NA	NA	NA	-1	NA	NA	NA	NA	NA	NA	NA	NA	-1	NA	NA	-1	1	NA	NA
SNAI2	1	NA	NA	NA	NA	NA	NA	1	1	NA	NA	1	NA	1	NA	NA	NA	NA	NA	NA	1	1	NA	NA	NA	NA	NA
PDK4	NA	NA	NA	NA	NA	NA	NA	-1	1	1	NA	NA	NA	NA	1	NA	NA	NA	NA	NA	NA	NA	NA	NA	NA	NA	NA
