# Supplementary material for: The role and therapeutic significance of the anoikis pathway in renal clear cell carcinoma
Source: Front Oncol. 2022 Sep 29;12:1009984. doi: 10.3389/fonc.2022.1009984 (PMC9557223; doi:10.3389/fonc.2022.1009984)
Supplement: Supplementary file 2 [file Table_2.xlsx]

## Sheet: cluster
Cluster	anoikis_score P = 3.04e-16
TCGA-A3-3306-01A-01R-0864-07	C1	-0.226729
TCGA-A3-3329-01A-01R-0864-07	C1	-0.240844
TCGA-B8-5550-01A-01R-1541-07	C2	0.099806
TCGA-A3-3378-01A-02R-1325-07	C1	-0.0704656
TCGA-A3-3343-01A-01R-0864-07	C1	-0.190797
TCGA-B0-5100-01A-01R-1420-07	C3	0.237502
TCGA-CJ-4869-01A-02R-1426-07	C3	0.0880408
TCGA-CJ-4895-01A-01R-1305-07	C2	0.191302
TCGA-B0-5691-01A-11R-1541-07	C2	-0.0691543
TCGA-B0-5121-01A-02R-1420-07	C3	-0.139969
TCGA-B0-5098-01A-01R-1420-07	C1	-0.0329069
TCGA-A3-3308-01A-02R-1325-07	C2	0.209329
TCGA-BP-4807-01A-01R-1305-07	C1	-0.224775
TCGA-B0-5707-01A-11R-1541-07	C1	-0.0321619
TCGA-BP-4971-01A-01R-1334-07	C1	0.27632
TCGA-B8-4620-01A-02R-1325-07	C1	-0.0599706
TCGA-BP-4967-01A-01R-1334-07	C2	0.0523863
TCGA-BP-5198-01A-01R-1426-07	C2	0.4313
TCGA-BP-4326-01A-01R-1289-07	C3	0.228471
TCGA-CJ-4904-01A-02R-1426-07	C1	0.303927
TCGA-CZ-4853-01A-01R-1426-07	C1	-0.441715
TCGA-A3-3387-01A-01R-1541-07	C1	0.294692
TCGA-A3-3326-01A-01R-0864-07	C1	-0.0757589
TCGA-BP-4784-01A-01R-1305-07	C2	0.330052
TCGA-BP-4766-01A-01R-1289-07	C1	0.224922
TCGA-CZ-5456-01A-01R-1503-07	C2	-0.134256
TCGA-CZ-4857-01A-01R-1305-07	C1	-0.255012
TCGA-B0-5400-01A-01R-1503-07	C3	-0.0921884
TCGA-BP-5010-01A-02R-1420-07	C1	0.227378
TCGA-CJ-4644-01A-02R-1325-07	C1	-0.0320395
TCGA-CJ-6033-01A-11R-1672-07	C1	0.282792
TCGA-EU-5907-01A-11R-1672-07	C1	-0.296928
TCGA-B4-5836-01A-11R-1672-07	C1	0.173681
TCGA-A3-3323-01A-02R-1325-07	C2	0.0779991
TCGA-BP-4353-01A-02R-1289-07	C1	0.0813085
TCGA-B0-5077-01A-01R-1334-07	C2	-0.091502
TCGA-CZ-5984-01A-11R-1672-07	C1	-0.326504
TCGA-B8-A54G-01A-11R-A266-07	C1	-0.093242
TCGA-B0-4713-01A-01R-1277-07	C3	-0.39813
TCGA-CZ-5463-01A-01R-1503-07	C1	-0.226255
TCGA-6D-AA2E-01A-11R-A37O-07	C1	-0.0771637
TCGA-CJ-6032-01A-11R-1672-07	C1	-0.233872
TCGA-BP-4801-01A-02R-1420-07	C2	-0.0231659
TCGA-EU-5904-01A-11R-1672-07	C1	0.0769674
TCGA-B8-5158-01A-01R-1420-07	C2	-0.105764
TCGA-BP-4969-01A-01R-1334-07	C1	-0.406931
TCGA-B8-5546-01A-01R-1541-07	C1	-0.237708
TCGA-B4-5844-01A-11R-1672-07	C2	0.375116
TCGA-CZ-5452-01A-01R-1503-07	C3	-0.153997
TCGA-BP-4991-01A-01R-1334-07	C2	0.352236
TCGA-A3-3316-01A-01R-0864-07	C2	-0.0218844
TCGA-B8-A54E-01A-11R-A266-07	C3	-0.467237
TCGA-BP-5170-01A-01R-1426-07	C3	-0.112686
TCGA-A3-A6NI-01A-11R-A33J-07	C1	0.0337788
TCGA-B0-5711-01A-11R-1672-07	C1	-0.0440587
TCGA-CZ-5451-01A-01R-1503-07	C2	0.0662383
TCGA-BP-4340-01A-01R-1289-07	C1	-0.500631
TCGA-BP-5180-01A-01R-1426-07	C1	-0.369233
TCGA-CJ-4639-01A-02R-1325-07	C2	-0.250105
TCGA-B0-4821-01A-01R-1503-07	C3	-0.0809048
TCGA-CZ-4860-01A-01R-1305-07	C3	-0.263147
TCGA-B0-4813-01A-01R-1277-07	C3	-0.0134633
TCGA-B8-4619-01A-02R-1325-07	C1	0.0298387
TCGA-CJ-4892-01A-01R-1305-07	C1	-0.430174
TCGA-CJ-4916-01A-01R-1426-07	C1	-0.337464
TCGA-BP-4964-01A-01R-1334-07	C1	-0.21797
TCGA-B0-5712-01A-11R-1672-07	C1	-0.26548
TCGA-BP-4965-01A-01R-1334-07	C2	-0.0784553
TCGA-BP-5199-01A-01R-1426-07	C1	0.332796
TCGA-BP-4973-01A-01R-1334-07	C1	-0.204677
TCGA-B2-5635-01A-01R-A277-07	C1	-0.0447695
TCGA-B0-4844-01A-01R-1277-07	C3	-0.16533
TCGA-G6-A8L7-01A-11R-A37O-07	C3	-0.0799132
TCGA-B0-5088-01A-01R-1334-07	C1	-0.0507251
TCGA-A3-3324-01A-02R-1325-07	C2	-0.301581
TCGA-BP-4968-01A-01R-1334-07	C3	-0.222577
TCGA-BP-4352-01A-01R-1289-07	C3	0.0441665
TCGA-CJ-4872-01A-01R-1305-07	C1	0.0315921
TCGA-DV-A4VZ-01A-11R-A266-07	C3	0.212348
TCGA-BP-5006-01A-01R-1334-07	C1	0.0255008
TCGA-BP-5009-01A-01R-1334-07	C1	0.0307611
TCGA-B0-4699-01A-01R-1277-07	C1	0.126296
TCGA-B0-4834-01A-01R-1305-07	C1	-0.0520474
TCGA-BP-4998-01A-01R-1334-07	C2	0.115182
TCGA-B0-5104-01A-01R-1420-07	C1	-0.19903
TCGA-B0-4945-01A-01R-1420-07	C1	0.206411
TCGA-B0-4842-01A-02R-1420-07	C3	-0.146791
TCGA-AK-3447-01A-01R-1766-07	C3	-0.34378
TCGA-B8-5551-01A-01R-1541-07	C1	0.0480525
TCGA-A3-3349-01A-01R-1188-07	C2	0.18841
TCGA-B0-4693-01A-01R-1277-07	C2	-0.145661
TCGA-A3-3346-01A-01R-1766-07	C3	-0.187413
TCGA-B0-5120-01A-01R-1420-07	C2	0.349865
TCGA-BP-5177-01A-01R-1426-07	C3	0.126635
TCGA-B8-4154-01A-01R-1188-07	C1	-0.462805
TCGA-B8-4153-01B-11R-1672-07	C3	-0.121038
TCGA-CJ-6030-01A-11R-1672-07	C1	-0.0646249
TCGA-CW-5584-01A-01R-1541-07	C2	0.252865
TCGA-B0-5696-01A-11R-1541-07	C1	-0.0466454
TCGA-BP-4765-01A-01R-1289-07	C1	0.249189
TCGA-BP-4782-01A-02R-1420-07	C2	0.218053
TCGA-B8-5165-01A-01R-1420-07	C2	-0.0481605
TCGA-B2-3923-01A-02R-A277-07	C1	0.086758
TCGA-AK-3425-01A-02R-1277-07	C1	0.0861091
TCGA-AS-3778-01A-01R-A32Z-07	C2	0.164231
TCGA-CW-6087-01A-11R-1672-07	C1	0.212555
TCGA-B0-5108-01A-01R-1420-07	C2	0.307375
TCGA-B0-5699-01A-11R-1541-07	C2	-0.178732
TCGA-B0-4814-01A-01R-1277-07	C1	-0.300259
TCGA-AK-3465-01A-02R-1325-07	C1	0.105649
TCGA-CJ-4918-01A-01R-1426-07	C2	0.160424
TCGA-BP-4344-01A-01R-1289-07	C2	0.289642
TCGA-B4-5835-01A-11R-1672-07	C3	-0.402536
TCGA-A3-3372-01A-02R-1325-07	C2	0.216644
TCGA-BP-4981-01A-01R-1334-07	C3	-0.103949
TCGA-BP-4170-01A-02R-1289-07	C1	-0.048124
TCGA-CJ-4643-01A-02R-1325-07	C2	0.207348
TCGA-BP-4977-01A-01R-1334-07	C1	-0.308944
TCGA-B2-5633-01A-01R-1541-07	C2	0.0963741
TCGA-A3-3311-01A-02R-1325-07	C1	-0.195843
TCGA-BP-5173-01A-01R-1426-07	C1	-0.0822341
TCGA-BP-5007-01A-01R-1334-07	C1	-0.181276
TCGA-A3-3362-01A-02R-1325-07	C1	-0.32925
TCGA-BP-4781-01A-01R-1305-07	C2	-0.26373
TCGA-A3-3365-01A-01R-0864-07	C1	0.021706
TCGA-DV-A4W0-01A-11R-A266-07	C1	0.260801
TCGA-B0-5092-01A-01R-1420-07	C3	-0.0498855
TCGA-CJ-5683-01A-11R-1541-07	C1	0.0628119
TCGA-BP-4331-01A-01R-1289-07	C1	0.27039
TCGA-B2-A4SR-01A-11R-A266-07	C2	0.325654
TCGA-BP-4976-01A-01R-1334-07	C1	-0.215469
TCGA-B2-4099-01A-02R-1188-07	C1	-0.382092
TCGA-B2-3923-01B-10R-A277-07	C1	-0.212787
TCGA-G6-A5PC-01A-11R-A33J-07	C3	-0.143968
TCGA-B0-5812-01A-11R-1672-07	C2	0.0405874
TCGA-BP-4341-01A-01R-1289-07	C1	-0.0864534
TCGA-BP-4795-01A-02R-1420-07	C2	0.137592
TCGA-AK-3451-01A-02R-1188-07	C3	-0.397731
TCGA-CZ-5987-01A-11R-1672-07	C1	-0.187646
TCGA-MM-A564-01A-11R-A266-07	C3	-0.0423739
TCGA-BP-4787-01A-01R-1305-07	C1	-0.336968
TCGA-DV-5566-01A-01R-1541-07	C3	-0.0140247
TCGA-BP-5190-01A-01R-1426-07	C3	-0.27575
TCGA-BP-4162-01A-02R-1325-07	C2	-0.200971
TCGA-BP-4343-01A-02R-1289-07	C1	-0.0880959
TCGA-AK-3458-01A-01R-1503-07	C3	-0.442383
TCGA-CZ-5457-01A-01R-1503-07	C1	-0.322536
TCGA-A3-A8OX-01A-11R-A37O-07	C1	0.247907
TCGA-B0-4817-01A-01R-1277-07	C3	-0.324137
TCGA-CJ-4888-01A-01R-1305-07	C1	0.159429
TCGA-BP-5191-01A-01R-1426-07	C3	-0.298077
TCGA-B2-5635-01A-01R-1541-07	C2	-0.072833
TCGA-T7-A92I-01A-11R-A37O-07	C1	-0.178842
TCGA-CJ-4901-01A-01R-1426-07	C1	-0.0396688
TCGA-G6-A8L8-01A-21R-A37O-07	C3	0.0634315
TCGA-BP-4173-01A-02R-1289-07	C1	0.105039
TCGA-AK-3434-01A-02R-1277-07	C2	0.00971423
TCGA-BP-4329-01A-02R-1289-07	C1	-0.0130232
TCGA-CZ-5462-01A-01R-1503-07	C1	-0.35668
TCGA-B0-4706-01A-01R-1503-07	C1	0.00216721
TCGA-CJ-4920-01A-01R-1426-07	C2	0.332048
TCGA-B8-A54I-01A-21R-A33J-07	C3	0.0429
TCGA-CJ-4893-01A-01R-1305-07	C1	-0.225632
TCGA-BP-4960-01A-01R-1334-07	C3	0.026968
TCGA-B2-3924-01A-02R-1325-07	C1	-0.304993
TCGA-B2-3923-01A-02R-1325-07	C1	0.0250885
TCGA-BP-5185-01A-01R-1426-07	C3	-0.281335
TCGA-A3-3357-01A-02R-1420-07	C1	-0.469219
TCGA-A3-A8CQ-01A-11R-A37O-07	C1	0.241197
TCGA-BP-5176-01A-01R-1426-07	C3	0.194858
TCGA-BP-4160-01A-02R-1289-07	C1	-0.0839123
TCGA-B2-3924-01A-02R-A277-07	C1	0.077767
TCGA-B0-4822-01A-01R-1277-07	C3	0.0525481
TCGA-A3-3328-01A-01R-0864-07	C1	-0.0236277
TCGA-CW-5583-01A-02R-1541-07	C2	0.0531176
TCGA-B8-4148-01A-02R-1325-07	C1	0.280955
TCGA-BP-4959-01A-01R-1334-07	C1	-0.0630987
TCGA-B0-5097-01A-01R-1420-07	C2	0.283748
TCGA-CW-6090-01A-11R-1672-07	C1	-0.243515
TCGA-B2-4102-01A-02R-1325-07	C2	-0.11532
TCGA-BP-4799-01A-01R-1305-07	C3	-0.0790691
TCGA-BP-4177-01A-02R-1420-07	C3	0.0193748
TCGA-CZ-4858-01A-01R-1305-07	C3	0.00332996
TCGA-AK-3450-01A-02R-1277-07	C1	-0.277423
TCGA-B0-5102-01A-01R-1420-07	C1	-0.33795
TCGA-BP-4167-01A-02R-1325-07	C3	-0.0448563
TCGA-BP-4989-01A-01R-1334-07	C1	-0.0428361
TCGA-BP-5200-01A-01R-1426-07	C1	0.256173
TCGA-B0-4818-01A-01R-1503-07	C2	-0.086576
TCGA-B0-4714-01A-01R-1277-07	C1	-0.15915
TCGA-3Z-A93Z-01A-11R-A37O-07	C1	0.0122699
TCGA-DV-5574-01A-01R-1541-07	C2	0.253702
TCGA-BP-5194-01A-02R-1426-07	C2	-0.0368341
TCGA-BP-4961-01A-01R-1334-07	C2	0.154521
TCGA-BP-4963-01A-01R-1334-07	C2	0.0835794
TCGA-AK-3460-01A-02R-1277-07	C1	-0.00326327
TCGA-B8-5545-01A-01R-1672-07	C2	0.276162
TCGA-BP-4165-01A-02R-1289-07	C1	-0.141121
TCGA-DV-A4VX-01A-11R-A266-07	C3	-0.34015
TCGA-B0-4846-01A-01R-1277-07	C2	-0.216309
TCGA-CZ-5453-01A-01R-1503-07	C1	0.0483144
TCGA-B0-5095-01A-01R-1420-07	C2	0.378064
TCGA-BP-4972-01A-01R-1334-07	C2	-0.100668
TCGA-B0-4712-01A-01R-1503-07	C3	-0.0609131
TCGA-BP-4164-01A-02R-1325-07	C1	-0.0395839
TCGA-CZ-5454-01A-01R-1503-07	C1	-0.264532
TCGA-BP-5202-01A-02R-1426-07	C1	0.197926
TCGA-CZ-5470-01A-01R-1503-07	C1	-0.180342
TCGA-CJ-4902-01A-01R-1426-07	C2	0.383615
TCGA-CJ-4905-01A-02R-1426-07	C2	0.317032
TCGA-B0-5075-01A-01R-1334-07	C1	-0.371726
TCGA-BP-4798-01A-01R-1305-07	C1	0.10357
TCGA-CJ-4882-01A-02R-1426-07	C3	-0.00409625
TCGA-B0-5706-01A-11R-1541-07	C2	0.089626
TCGA-CJ-4891-01A-01R-1305-07	C3	0.134787
TCGA-CZ-5988-01A-11R-1672-07	C2	0.119901
TCGA-AK-3440-01A-02R-1277-07	C1	-0.268583
TCGA-AK-3453-01A-02R-1277-07	C3	-0.0955518
TCGA-B0-5697-01A-11R-1541-07	C1	0.0526437
TCGA-B0-4841-01A-01R-1277-07	C3	0.0947956
TCGA-CJ-5679-01A-11R-1541-07	C3	-0.120662
TCGA-B0-4845-01A-01R-1277-07	C1	0.0389997
TCGA-CZ-5465-01A-01R-1503-07	C1	-0.293588
TCGA-CJ-5686-01A-11R-1672-07	C1	-0.218193
TCGA-BP-4345-01A-01R-1289-07	C2	0.471706
TCGA-B0-5693-01A-11R-1541-07	C1	0.357697
TCGA-B0-4838-01A-01R-1305-07	C2	0.251063
TCGA-B8-5549-01A-01R-1541-07	C2	0.0871533
TCGA-CJ-4876-01A-01R-1305-07	C3	-0.185269
TCGA-BP-4337-01A-01R-1289-07	C2	-0.0188891
TCGA-BP-4985-01A-01R-1334-07	C1	0.00763556
TCGA-A3-3374-01A-02R-1325-07	C1	-0.0369717
TCGA-A3-3373-01A-02R-1420-07	C1	0.0697047
TCGA-B0-5700-01A-11R-1541-07	C3	-0.0728962
TCGA-B4-5378-01A-01R-1503-07	C2	0.2589
TCGA-B0-5709-01A-11R-1541-07	C2	0.227479
TCGA-BP-4351-01A-01R-1289-07	C1	-0.0351946
TCGA-BP-4774-01A-01R-1289-07	C1	0.0757634
TCGA-BP-4986-01A-01R-1334-07	C2	-0.0221489
TCGA-B0-5113-01A-01R-1420-07	C2	0.00236873
TCGA-A3-A6NL-01A-11R-A33J-07	C1	0.408412
TCGA-CJ-5680-01A-11R-1541-07	C1	0.158302
TCGA-B0-5402-01A-01R-1503-07	C3	-0.150336
TCGA-CZ-4862-01A-01R-1305-07	C1	0.0750647
TCGA-CW-6097-01A-11R-1672-07	C2	0.132833
TCGA-B4-5843-01A-11R-1672-07	C1	-0.220102
TCGA-A3-3307-01A-01R-0864-07	C1	0.0826024
TCGA-B0-4688-01A-01R-1277-07	C1	0.145015
TCGA-CJ-5689-01A-11R-1541-07	C1	0.285165
TCGA-BP-4335-01A-01R-1289-07	C1	-0.205629
TCGA-CJ-4908-01A-01R-1426-07	C2	0.420685
TCGA-CZ-5458-01A-01R-1503-07	C2	0.265406
TCGA-B0-4690-01A-01R-1277-07	C1	-0.058731
TCGA-CJ-4900-01A-01R-1334-07	C3	-0.0531788
TCGA-A3-3359-01A-01R-0864-07	C2	-0.185912
TCGA-CJ-4907-01A-01R-1426-07	C2	0.127971
TCGA-CZ-5460-01A-01R-1503-07	C3	-0.0415797
TCGA-B8-4622-01A-02R-1277-07	C2	-0.0238079
TCGA-BP-4994-01A-01R-1334-07	C1	-0.0288957
TCGA-B0-4703-01A-01R-1277-07	C2	0.253504
TCGA-BP-4346-01A-01R-1289-07	C1	0.0264521
TCGA-B0-4839-01A-01R-1305-07	C3	-0.252255
TCGA-CZ-5985-01A-11R-1672-07	C1	-0.335389
TCGA-CZ-4865-01A-02R-1503-07	C1	0.276584
TCGA-CJ-5675-01A-11R-1541-07	C1	-0.100322
TCGA-AK-3429-01A-02R-1325-07	C1	-0.350438
TCGA-B0-4843-01A-01R-1277-07	C1	0.114124
TCGA-CJ-4886-01A-01R-1305-07	C2	0.0304066
TCGA-B0-5083-01A-02R-1420-07	C1	-0.0501135
TCGA-B0-5117-01A-01R-1420-07	C3	0.121656
TCGA-BP-4325-01A-02R-1289-07	C1	-0.367504
TCGA-CW-5580-01A-01R-1672-07	C1	-0.0162497
TCGA-BP-5000-01A-01R-1334-07	C3	-0.239404
TCGA-B0-5106-01A-01R-1420-07	C1	0.122229
TCGA-CJ-6031-01A-11R-1672-07	C2	0.261691
TCGA-B0-4852-01A-01R-1503-07	C1	-0.167336
TCGA-B0-5690-01A-11R-1541-07	C2	0.404979
TCGA-B0-4697-01A-01R-1277-07	C3	0.0221623
TCGA-CZ-4859-01A-02R-1426-07	C1	-0.282645
TCGA-BP-4789-01A-01R-1305-07	C2	0.304062
TCGA-CZ-5989-01A-11R-1672-07	C1	-0.145824
TCGA-A3-3347-01A-02R-1325-07	C2	-0.0304916
TCGA-B0-4827-01A-02R-1420-07	C1	0.280317
TCGA-BP-4760-01A-02R-1420-07	C1	0.320489
TCGA-CW-5581-01A-02R-1541-07	C2	0.108187
TCGA-AK-3427-01A-01R-0864-07	C3	-0.306957
TCGA-AK-3445-01A-02R-1277-07	C1	-0.0998948
TCGA-BP-4763-01A-01R-1289-07	C1	-0.130486
TCGA-BP-4776-01A-01R-1289-07	C3	0.280707
TCGA-BP-5008-01A-01R-1334-07	C1	0.19847
TCGA-B0-5119-01A-02R-1420-07	C2	0.021514
TCGA-CJ-5684-01A-11R-1541-07	C1	-0.296214
TCGA-BP-4338-01A-01R-1289-07	C3	-0.222655
TCGA-B0-5085-01A-01R-1334-07	C3	-0.270301
TCGA-A3-3380-01A-01R-0864-07	C1	-0.22373
TCGA-B0-4691-01A-01R-1277-07	C3	-0.314807
TCGA-B0-5695-01A-11R-1541-07	C1	0.195461
TCGA-A3-3317-01A-02R-1325-07	C2	0.0116706
TCGA-CJ-5672-01A-11R-1541-07	C2	0.0211137
TCGA-CJ-5677-01A-11R-1541-07	C3	-0.0565351
TCGA-A3-3367-01A-02R-1420-07	C1	-0.250455
TCGA-B8-A54K-01A-11R-A33J-07	C1	0.106976
TCGA-BP-4992-01A-01R-1334-07	C3	0.0814443
TCGA-B0-5705-01A-11R-1541-07	C2	-0.310209
TCGA-CW-6088-01A-11R-1672-07	C2	0.184343
TCGA-BP-4758-01A-01R-1289-07	C3	-0.0560094
TCGA-BP-4355-01A-01R-1289-07	C1	0.167164
TCGA-CZ-4866-01A-01R-1503-07	C1	-0.290607
TCGA-B8-4621-01A-01R-1503-07	C1	-0.290808
TCGA-BP-4995-01A-01R-1334-07	C1	-0.0586353
TCGA-BP-5004-01A-01R-1334-07	C1	0.00218312
TCGA-B8-5162-01A-01R-1420-07	C1	0.355447
TCGA-B0-4847-01A-01R-1277-07	C3	-0.195392
TCGA-BP-4769-01A-01R-1289-07	C2	0.337299
TCGA-CZ-5982-01A-11R-1672-07	C1	0.276652
TCGA-CJ-4870-01A-01R-1305-07	C1	0.320927
TCGA-AK-3454-01A-02R-1277-07	C3	0.0443623
TCGA-BP-4975-01A-01R-1334-07	C1	0.0634262
TCGA-CW-5585-01A-01R-1541-07	C2	0.112376
TCGA-B2-4098-01A-02R-1325-07	C1	-0.248503
TCGA-CJ-5678-01A-11R-1541-07	C3	-0.405114
TCGA-B0-5702-01A-11R-1541-07	C3	-0.15332
TCGA-CJ-4638-01A-02R-1325-07	C3	-0.306081
TCGA-DV-5573-01A-01R-1541-07	C1	-0.103382
TCGA-BP-5196-01A-01R-1426-07	C1	0.188634
TCGA-A3-3351-01A-02R-1325-07	C2	-0.129426
TCGA-B8-A54D-01A-21R-A266-07	C1	-0.010643
TCGA-A3-3322-01A-02R-1325-07	C1	-0.163526
TCGA-B8-A54H-01A-11R-A33J-07	C2	0.0954581
TCGA-A3-A8OW-01A-11R-A37O-07	C1	0.242331
TCGA-B0-4701-01A-01R-1277-07	C1	0.319493
TCGA-B2-4101-01A-02R-1277-07	C2	0.0948344
TCGA-A3-3320-01A-02R-1325-07	C2	-0.24496
TCGA-BP-4999-01A-01R-1334-07	C2	0.123451
TCGA-BP-4161-01A-02R-1325-07	C1	-0.345571
TCGA-B8-4143-01A-01R-1188-07	C1	0.240675
TCGA-B0-5701-01A-11R-1541-07	C1	-0.210732
TCGA-BP-4797-01A-01R-1305-07	C2	-0.0801705
TCGA-DV-A4W0-05A-11R-A266-07	C1	0.180997
TCGA-BP-4174-01A-02R-1289-07	C1	-0.218217
TCGA-A3-3385-01A-02R-1420-07	C1	-0.313905
TCGA-CZ-5469-01A-01R-1503-07	C3	-0.284038
TCGA-BP-4970-01A-01R-1334-07	C2	-0.0340221
TCGA-BP-4330-01A-01R-1289-07	C2	-0.144249
TCGA-BP-4349-01A-01R-1289-07	C1	0.23364
TCGA-AK-3461-01A-02R-1277-07	C1	0.231121
TCGA-A3-3383-01A-02R-1325-07	C3	-0.200872
TCGA-BP-4159-01A-02R-1289-07	C3	0.248791
TCGA-B2-5635-01B-04R-A277-07	C1	-0.174495
TCGA-CJ-4889-01A-01R-1305-07	C2	0.119736
TCGA-BP-4962-01A-01R-1334-07	C3	-0.185191
TCGA-CJ-5682-01A-11R-1541-07	C1	0.0537521
TCGA-BP-4347-01A-01R-1289-07	C1	0.0111609
TCGA-BP-5186-01A-01R-1426-07	C2	0.115187
TCGA-CZ-4856-01A-02R-1426-07	C2	-0.0458489
TCGA-B0-4824-01A-01R-1277-07	C1	-0.239438
TCGA-A3-3376-01A-02R-1420-07	C2	0.253019
TCGA-CJ-4635-01A-02R-1305-07	C1	0.0156066
TCGA-BP-5183-01A-01R-1426-07	C1	-0.0524133
TCGA-A3-A8OV-01A-11R-A37O-07	C1	-0.228398
TCGA-B8-5159-01A-01R-1420-07	C1	-0.326641
TCGA-B8-5163-01A-01R-1420-07	C2	0.212649
TCGA-CZ-5461-01A-01R-1503-07	C2	0.127052
TCGA-GK-A6C7-01A-11R-A33J-07	C1	0.450769
TCGA-BP-4771-01A-01R-1289-07	C2	0.0780709
TCGA-BP-4803-01A-01R-1305-07	C2	-0.00122971
TCGA-B2-5639-01A-01R-1541-07	C2	-0.230381
TCGA-CZ-5455-01A-01R-1503-07	C1	-0.0457427
TCGA-CJ-4897-01A-03R-1426-07	C1	-0.245807
TCGA-B0-5107-01A-01R-1420-07	C3	-0.124015
TCGA-BP-4759-01A-01R-1289-07	C3	0.107608
TCGA-B0-4836-01A-01R-1305-07	C3	0.136198
TCGA-B8-A7U6-01A-12R-A37O-07	C1	0.456369
TCGA-B2-5636-01A-02R-1541-07	C2	0.253407
TCGA-A3-3382-01A-02R-1325-07	C2	-0.179044
TCGA-CZ-5464-01A-01R-1503-07	C2	-0.228258
TCGA-CJ-4634-01A-02R-1325-07	C2	0.0595963
TCGA-CJ-6028-01A-11R-1672-07	C2	-0.0840026
TCGA-BP-4804-01A-02R-1305-07	C2	0.238666
TCGA-CJ-4912-01A-01R-1426-07	C3	0.0259692
TCGA-CJ-4873-01A-01R-1305-07	C3	-0.238762
TCGA-CJ-4894-01A-01R-1305-07	C1	0.0802384
TCGA-CW-5588-01A-01R-1541-07	C2	0.00835237
TCGA-A3-3325-01A-01R-0864-07	C1	0.203976
TCGA-CJ-4871-01A-01R-1305-07	C1	0.0633906
TCGA-CJ-4640-01A-02R-1325-07	C3	-0.198598
TCGA-BP-4762-01A-02R-1289-07	C1	0.208054
TCGA-B0-5094-01A-01R-1420-07	C1	-0.323759
TCGA-CZ-5467-01A-01R-1503-07	C2	0.251925
TCGA-A3-3363-01A-01R-0864-07	C1	-0.369129
TCGA-CZ-5468-01A-01R-1503-07	C3	0.00654755
TCGA-B2-3924-01B-03R-A277-07	C1	-0.0653635
TCGA-BP-5181-01A-01R-1426-07	C1	0.0249758
TCGA-B8-5553-01A-01R-1541-07	C2	0.253897
TCGA-BP-4761-01A-01R-1289-07	C3	-0.0636316
TCGA-B2-5633-01A-01R-A277-07	C1	0.0425899
TCGA-A3-3358-01A-01R-1541-07	C1	-0.474742
TCGA-CZ-4864-01A-01R-1503-07	C1	-0.135476
TCGA-AK-3436-01A-02R-1325-07	C3	-0.198664
TCGA-CZ-5466-01A-01R-1503-07	C1	0.0440275
TCGA-B0-5080-01A-01R-1503-07	C2	0.474179
TCGA-CZ-4861-01A-01R-1305-07	C1	-0.265113
TCGA-CJ-5671-01A-11R-1541-07	C2	0.299092
TCGA-AK-3431-01A-02R-1277-07	C2	0.365314
TCGA-B0-4811-01A-01R-1503-07	C3	-0.114984
TCGA-A3-3313-01A-02R-1325-07	C3	-0.251377
TCGA-B8-5552-01B-11R-1672-07	C2	0.258816
TCGA-CJ-6027-01A-11R-1672-07	C3	-0.264574
TCGA-BP-4756-01A-01R-1289-07	C1	-0.379702
TCGA-A3-3319-01A-02R-1325-07	C3	-0.361337
TCGA-MW-A4EC-01A-11R-A266-07	C1	-0.251885
TCGA-B0-4816-01A-01R-1503-07	C2	0.368971
TCGA-CZ-4863-01A-01R-1503-07	C1	-0.229063
TCGA-B0-5110-01A-01R-1420-07	C2	0.077818
TCGA-CZ-5986-01A-11R-1672-07	C1	-0.182038
TCGA-B0-4828-01A-01R-1277-07	C3	-0.261584
TCGA-B8-4151-01A-01R-1188-07	C1	-0.321692
TCGA-EU-5905-01A-11R-1672-07	C3	-0.113149
TCGA-CJ-4903-01A-01R-1426-07	C1	-0.351702
TCGA-B0-5698-01A-11R-1672-07	C1	0.0798057
TCGA-B0-4815-01A-01R-1503-07	C1	-0.0496035
TCGA-B0-5081-01A-01R-1334-07	C2	0.219376
TCGA-A3-3352-01A-01R-0864-07	C1	-0.420459
TCGA-A3-A6NJ-01A-12R-A33J-07	C1	0.264949
TCGA-BP-5184-01A-01R-1426-07	C1	0.183265
TCGA-CJ-4899-01A-01R-1334-07	C2	0.261667
TCGA-CJ-4881-01A-01R-1305-07	C3	-0.22154
TCGA-CJ-4878-01A-01R-1305-07	C1	0.333516
TCGA-B0-4819-01A-01R-1277-07	C1	-0.0340543
TCGA-B0-4710-01A-01R-1503-07	C1	0.268067
TCGA-A3-3331-01A-02R-1325-07	C2	0.0334618
TCGA-BP-5174-01A-01R-1426-07	C3	-0.228308
TCGA-B0-5694-01A-11R-1541-07	C1	-0.332558
TCGA-B0-5116-01A-02R-1420-07	C1	-0.14988
TCGA-DV-5567-01A-01R-1541-07	C2	0.305624
TCGA-BP-5169-01A-01R-1426-07	C3	-0.0327839
TCGA-B0-4700-01A-02R-1541-07	C1	0.159814
TCGA-AK-3433-01A-02R-1277-07	C1	0.0175619
TCGA-CJ-4875-01A-01R-1305-07	C3	-0.313448
TCGA-A3-3335-01A-01R-0864-07	C1	-0.300484
TCGA-B0-5115-01A-01R-1420-07	C2	0.205108
TCGA-BP-5195-01A-02R-1426-07	C2	0.35004
TCGA-BP-4354-01A-02R-1289-07	C1	0.272164
TCGA-BP-4974-01A-01R-1334-07	C2	0.451139
TCGA-CJ-4641-01A-02R-1325-07	C1	-0.0435246
TCGA-B4-5834-01A-11R-1672-07	C1	0.254619
TCGA-BP-4169-01A-02R-1289-07	C2	0.329417
TCGA-B2-5633-01B-04R-A277-07	C1	0.0107317
TCGA-BP-4777-01A-01R-1289-07	C1	-0.176627
TCGA-B0-5399-01A-01R-1503-07	C1	-0.0523611
TCGA-B0-5099-01A-01R-1420-07	C1	-0.0346649
TCGA-BP-4166-01A-02R-1289-07	C2	0.244517
TCGA-CJ-4890-01A-01R-1305-07	C1	0.182969
TCGA-B0-5084-01A-01R-1334-07	C3	-0.220976
TCGA-BP-5168-01A-01R-1420-07	C1	0.0646795
TCGA-BP-4770-01A-01R-1503-07	C1	0.146671
TCGA-BP-4332-01A-01R-1289-07	C1	0.140335
TCGA-B4-5832-01A-11R-1672-07	C1	-0.117087
TCGA-B0-4849-01A-01R-1277-07	C1	0.237094
TCGA-B8-5164-01A-01R-1420-07	C1	-0.0286774
TCGA-CW-6093-01A-11R-1672-07	C1	0.187052
TCGA-MM-A84U-01A-11R-A37O-07	C3	-0.0740467
TCGA-CJ-4637-01A-02R-1325-07	C1	-0.0151337
TCGA-CJ-4642-01B-01R-1305-07	C3	-0.263179
TCGA-BP-5178-01A-01R-1426-07	C3	0.0456892
TCGA-BP-4790-01A-01R-1305-07	C1	0.15913
TCGA-B0-5692-01A-11R-1541-07	C1	-0.210481
TCGA-CJ-4885-01A-01R-1305-07	C1	-0.23639
TCGA-BP-4768-01A-01R-1289-07	C1	-0.129473
TCGA-B0-5713-01A-11R-1672-07	C1	0.103951
TCGA-CW-5587-01A-01R-1541-07	C2	-0.324121
TCGA-BP-5201-01A-01R-1426-07	C1	-0.179112
TCGA-CW-5590-01A-01R-1541-07	C2	0.265027
TCGA-A3-3370-01A-02R-1420-07	C2	-0.141214
TCGA-B0-4848-01A-01R-1277-07	C1	-0.120574
TCGA-B0-4698-01A-01R-1503-07	C1	0.362243
TCGA-BP-4982-01A-01R-1334-07	C2	0.153704
TCGA-CJ-4636-01A-02R-1325-07	C2	-0.147531
TCGA-AK-3455-01A-01R-0864-07	C1	-0.406297
TCGA-A3-A6NN-01A-12R-A33J-07	C1	0.227994
TCGA-G6-A8L6-01A-11R-A37O-07	C3	-0.00748177
TCGA-B0-5703-01A-11R-1541-07	C3	0.0419092
TCGA-BP-4176-01A-02R-1289-07	C1	-0.179188
TCGA-B0-4707-01A-01R-1277-07	C3	-0.0590265
TCGA-CW-5591-01A-01R-1541-07	C2	-0.0148432
TCGA-B4-5838-01A-11R-1672-07	C1	-0.0284136
TCGA-BP-4775-01A-01R-1289-07	C1	-0.0624268
TCGA-BP-4158-01A-02R-1289-07	C1	0.0293161
TCGA-CJ-5676-01A-11R-1541-07	C3	0.0376462
TCGA-DV-5565-01A-01R-1541-07	C3	0.185956
TCGA-BP-4163-01A-02R-1325-07	C1	-0.073208
TCGA-BP-4327-01A-01R-1289-07	C1	-0.0785124
TCGA-BP-5182-01A-01R-1426-07	C1	0.19958
TCGA-CJ-4884-01A-01R-1305-07	C1	0.047955
TCGA-CZ-5459-01A-01R-1503-07	C3	-0.166717
TCGA-B0-5096-01A-01R-1420-07	C1	0.0174884
TCGA-B8-A54J-01A-11R-A33J-07	C1	0.249665
TCGA-BP-4987-01A-01R-1334-07	C2	-0.0295325
TCGA-B2-5641-01A-01R-1541-07	C2	-0.224071
TCGA-AK-3426-01A-02R-1325-07	C3	0.119799
TCGA-B4-5377-01A-01R-1503-07	C1	0.018572
TCGA-BP-4342-01A-01R-1289-07	C2	-0.0237196
TCGA-BP-4983-01A-01R-1334-07	C1	0.0885569
TCGA-B0-4833-01A-01R-1305-07	C1	-0.264769
TCGA-AS-3777-01A-01R-0864-07	C3	-0.213347
TCGA-CJ-4874-01A-01R-1305-07	C1	-0.283036
TCGA-CJ-4887-01A-01R-1305-07	C3	0.00739301
TCGA-AK-3428-01A-02R-1277-07	C1	0.219012
TCGA-B8-A54F-01A-11R-A266-07	C2	0.224217
TCGA-BP-5187-01A-01R-1426-07	C1	0.0451295
TCGA-CJ-5681-01A-11R-1541-07	C1	-0.187626
TCGA-B0-4696-01A-01R-1277-07	C1	0.286938
TCGA-B0-5710-01A-11R-1672-07	C2	0.362622
TCGA-BP-5175-01A-01R-1426-07	C3	-0.322011
TCGA-DV-5569-01A-01R-1541-07	C1	-0.0538648
TCGA-BP-5189-01A-02R-1426-07	C2	0.274073
TCGA-AK-3443-01A-02R-1325-07	C1	-0.0528647
TCGA-CW-5589-01A-01R-1541-07	C2	-0.0263887
TCGA-B0-5109-01A-02R-1420-07	C1	-0.0126389
TCGA-B8-A8YJ-01A-13R-A39I-07	C2	0.520615
TCGA-B0-4810-01A-01R-1503-07	C1	0.0775053
TCGA-BP-5001-01A-01R-1334-07	C3	-0.259927
TCGA-EU-5906-01A-11R-1672-07	C2	0.104186
TCGA-BP-4993-01A-02R-1420-07	C2	0.24266
TCGA-B0-4823-01A-02R-1420-07	C1	0.11362
TCGA-DV-5576-01A-01R-1541-07	C2	0.114576
TCGA-MM-A563-01A-11R-A266-07	C1	0.221224
TCGA-BP-5192-01A-01R-1426-07	C1	-0.119341
TCGA-CJ-4868-01A-01R-1305-07	C2	0.336827
TCGA-A3-A8OU-01A-11R-A37O-07	C1	0.271812
TCGA-B0-4718-01A-01R-1277-07	C3	0.0946236
TCGA-DV-5568-01A-01R-1541-07	C1	0.149047
TCGA-AK-3456-01A-02R-1325-07	C1	-0.333063
TCGA-B0-4837-01A-01R-1305-07	C3	0.115602
TCGA-B0-4694-01A-01R-1277-07	C1	-0.400209
TCGA-BP-4334-01A-01R-1289-07	C3	-0.0408872
TCGA-B8-4146-01B-11R-1672-07	C1	-0.321342
TCGA-CZ-4854-01A-01R-1305-07	C1	-0.268371
TCGA-DV-5575-01A-01R-1541-07	C2	0.043232

## Sheet: cluster-2
	TCGA-A3-3306-01A-01R-0864-07	TCGA-A3-3329-01A-01R-0864-07	TCGA-B8-5550-01A-01R-1541-07	TCGA-A3-3378-01A-02R-1325-07	TCGA-A3-3343-01A-01R-0864-07	TCGA-B0-5100-01A-01R-1420-07	TCGA-CJ-4869-01A-02R-1426-07	TCGA-CJ-4895-01A-01R-1305-07	TCGA-B0-5691-01A-11R-1541-07	TCGA-B0-5121-01A-02R-1420-07	TCGA-B0-5098-01A-01R-1420-07	TCGA-A3-3308-01A-02R-1325-07	TCGA-BP-4807-01A-01R-1305-07	TCGA-B0-5707-01A-11R-1541-07	TCGA-BP-4971-01A-01R-1334-07	TCGA-B8-4620-01A-02R-1325-07	TCGA-BP-4967-01A-01R-1334-07	TCGA-BP-5198-01A-01R-1426-07	TCGA-BP-4326-01A-01R-1289-07	TCGA-CJ-4904-01A-02R-1426-07	TCGA-CZ-4853-01A-01R-1426-07	TCGA-A3-3387-01A-01R-1541-07	TCGA-A3-3326-01A-01R-0864-07	TCGA-BP-4784-01A-01R-1305-07	TCGA-BP-4766-01A-01R-1289-07	TCGA-CZ-5456-01A-01R-1503-07	TCGA-CZ-4857-01A-01R-1305-07	TCGA-B0-5400-01A-01R-1503-07	TCGA-BP-5010-01A-02R-1420-07	TCGA-CJ-4644-01A-02R-1325-07	TCGA-CJ-6033-01A-11R-1672-07	TCGA-EU-5907-01A-11R-1672-07	TCGA-B4-5836-01A-11R-1672-07	TCGA-A3-3323-01A-02R-1325-07	TCGA-BP-4353-01A-02R-1289-07	TCGA-B0-5077-01A-01R-1334-07	TCGA-CZ-5984-01A-11R-1672-07	TCGA-B8-A54G-01A-11R-A266-07	TCGA-B0-4713-01A-01R-1277-07	TCGA-CZ-5463-01A-01R-1503-07	TCGA-6D-AA2E-01A-11R-A37O-07	TCGA-CJ-6032-01A-11R-1672-07	TCGA-BP-4801-01A-02R-1420-07	TCGA-EU-5904-01A-11R-1672-07	TCGA-B8-5158-01A-01R-1420-07	TCGA-BP-4969-01A-01R-1334-07	TCGA-B8-5546-01A-01R-1541-07	TCGA-B4-5844-01A-11R-1672-07	TCGA-CZ-5452-01A-01R-1503-07
NOTCH1	DOWN	UP	UP	NOCHANGE	NOCHANGE	NOCHANGE	UP	NOCHANGE	UP	NOCHANGE	DOWN	UP	NOCHANGE	NOCHANGE	UP	NOCHANGE	UP	NOCHANGE	UP	UP	NOCHANGE	NOCHANGE	UP	UP	UP	NOCHANGE	NOCHANGE	NOCHANGE	NOCHANGE	NOCHANGE	NOCHANGE	NOCHANGE	NOCHANGE	UP	NOCHANGE	UP	NOCHANGE	NOCHANGE	NOCHANGE	NOCHANGE	NOCHANGE	UP	UP	UP	NOCHANGE	UP	NOCHANGE	UP	NOCHANGE
ANKRD13C	UP	NOCHANGE	NOCHANGE	NOCHANGE	NOCHANGE	NOCHANGE	DOWN	NOCHANGE	NOCHANGE	DOWN	DOWN	NOCHANGE	NOCHANGE	DOWN	NOCHANGE	NOCHANGE	NOCHANGE	NOCHANGE	NOCHANGE	NOCHANGE	NOCHANGE	NOCHANGE	NOCHANGE	NOCHANGE	NOCHANGE	NOCHANGE	NOCHANGE	DOWN	DOWN	NOCHANGE	NOCHANGE	DOWN	NOCHANGE	NOCHANGE	NOCHANGE	NOCHANGE	NOCHANGE	NOCHANGE	DOWN	UP	NOCHANGE	NOCHANGE	NOCHANGE	NOCHANGE	NOCHANGE	DOWN	NOCHANGE	NOCHANGE	DOWN
PDK4	UP	UP	NOCHANGE	NOCHANGE	UP	DOWN	NOCHANGE	NOCHANGE	UP	NOCHANGE	DOWN	NOCHANGE	NOCHANGE	DOWN	DOWN	UP	UP	UP	NOCHANGE	UP	NOCHANGE	NOCHANGE	NOCHANGE	NOCHANGE	NOCHANGE	NOCHANGE	NOCHANGE	NOCHANGE	NOCHANGE	UP	DOWN	NOCHANGE	UP	NOCHANGE	UP	DOWN	NOCHANGE	NOCHANGE	NOCHANGE	NOCHANGE	NOCHANGE	NOCHANGE	NOCHANGE	UP	NOCHANGE	UP	NOCHANGE	NOCHANGE	NOCHANGE
STK11	NOCHANGE	NOCHANGE	NOCHANGE	NOCHANGE	NOCHANGE	UP	UP	NOCHANGE	NOCHANGE	NOCHANGE	NOCHANGE	NOCHANGE	NOCHANGE	NOCHANGE	NOCHANGE	NOCHANGE	NOCHANGE	NOCHANGE	NOCHANGE	NOCHANGE	NOCHANGE	NOCHANGE	NOCHANGE	UP	UP	NOCHANGE	NOCHANGE	UP	NOCHANGE	NOCHANGE	NOCHANGE	NOCHANGE	NOCHANGE	NOCHANGE	NOCHANGE	NOCHANGE	NOCHANGE	UP	NOCHANGE	NOCHANGE	UP	NOCHANGE	NOCHANGE	NOCHANGE	NOCHANGE	UP	NOCHANGE	NOCHANGE	UP
DAPK2	DOWN	NOCHANGE	NOCHANGE	NOCHANGE	NOCHANGE	UP	NOCHANGE	NOCHANGE	NOCHANGE	NOCHANGE	NOCHANGE	NOCHANGE	NOCHANGE	DOWN	NOCHANGE	NOCHANGE	UP	UP	DOWN	NOCHANGE	DOWN	NOCHANGE	NOCHANGE	UP	NOCHANGE	NOCHANGE	NOCHANGE	NOCHANGE	UP	NOCHANGE	NOCHANGE	DOWN	NOCHANGE	UP	UP	NOCHANGE	UP	NOCHANGE	NOCHANGE	NOCHANGE	NOCHANGE	DOWN	NOCHANGE	NOCHANGE	NOCHANGE	NOCHANGE	DOWN	NOCHANGE	NOCHANGE
PIK3CA	NOCHANGE	NOCHANGE	NOCHANGE	NOCHANGE	NOCHANGE	DOWN	DOWN	NOCHANGE	UP	NOCHANGE	UP	NOCHANGE	NOCHANGE	DOWN	DOWN	NOCHANGE	NOCHANGE	NOCHANGE	NOCHANGE	NOCHANGE	NOCHANGE	NOCHANGE	NOCHANGE	NOCHANGE	NOCHANGE	NOCHANGE	NOCHANGE	DOWN	DOWN	NOCHANGE	NOCHANGE	NOCHANGE	NOCHANGE	NOCHANGE	NOCHANGE	NOCHANGE	NOCHANGE	NOCHANGE	DOWN	NOCHANGE	NOCHANGE	NOCHANGE	NOCHANGE	NOCHANGE	NOCHANGE	DOWN	NOCHANGE	NOCHANGE	DOWN
CEACAM6	NOCHANGE	NOCHANGE	NOCHANGE	NOCHANGE	NOCHANGE	NOCHANGE	NOCHANGE	NOCHANGE	NOCHANGE	NOCHANGE	NOCHANGE	NOCHANGE	NOCHANGE	UP	NOCHANGE	NOCHANGE	NOCHANGE	NOCHANGE	NOCHANGE	NOCHANGE	NOCHANGE	NOCHANGE	NOCHANGE	NOCHANGE	NOCHANGE	NOCHANGE	NOCHANGE	NOCHANGE	NOCHANGE	NOCHANGE	NOCHANGE	NOCHANGE	NOCHANGE	NOCHANGE	NOCHANGE	NOCHANGE	NOCHANGE	NOCHANGE	NOCHANGE	NOCHANGE	NOCHANGE	NOCHANGE	NOCHANGE	NOCHANGE	NOCHANGE	NOCHANGE	NOCHANGE	NOCHANGE	NOCHANGE
TLE1	DOWN	NOCHANGE	NOCHANGE	NOCHANGE	NOCHANGE	NOCHANGE	NOCHANGE	NOCHANGE	NOCHANGE	NOCHANGE	NOCHANGE	NOCHANGE	NOCHANGE	UP	NOCHANGE	NOCHANGE	NOCHANGE	UP	UP	NOCHANGE	NOCHANGE	UP	NOCHANGE	UP	NOCHANGE	NOCHANGE	NOCHANGE	NOCHANGE	NOCHANGE	NOCHANGE	NOCHANGE	DOWN	NOCHANGE	NOCHANGE	UP	NOCHANGE	NOCHANGE	NOCHANGE	NOCHANGE	NOCHANGE	NOCHANGE	NOCHANGE	NOCHANGE	UP	NOCHANGE	NOCHANGE	NOCHANGE	NOCHANGE	NOCHANGE
MAP3K7	DOWN	NOCHANGE	NOCHANGE	NOCHANGE	NOCHANGE	NOCHANGE	NOCHANGE	NOCHANGE	NOCHANGE	DOWN	UP	NOCHANGE	NOCHANGE	NOCHANGE	NOCHANGE	NOCHANGE	NOCHANGE	NOCHANGE	NOCHANGE	NOCHANGE	DOWN	NOCHANGE	NOCHANGE	NOCHANGE	NOCHANGE	NOCHANGE	UP	NOCHANGE	NOCHANGE	NOCHANGE	NOCHANGE	DOWN	NOCHANGE	NOCHANGE	UP	NOCHANGE	NOCHANGE	NOCHANGE	NOCHANGE	UP	NOCHANGE	DOWN	NOCHANGE	NOCHANGE	NOCHANGE	DOWN	NOCHANGE	NOCHANGE	DOWN
NTRK2	NOCHANGE	DOWN	NOCHANGE	NOCHANGE	DOWN	NOCHANGE	DOWN	NOCHANGE	NOCHANGE	NOCHANGE	DOWN	NOCHANGE	NOCHANGE	DOWN	NOCHANGE	DOWN	DOWN	DOWN	DOWN	NOCHANGE	NOCHANGE	NOCHANGE	NOCHANGE	NOCHANGE	DOWN	DOWN	DOWN	NOCHANGE	NOCHANGE	NOCHANGE	NOCHANGE	DOWN	NOCHANGE	NOCHANGE	DOWN	DOWN	DOWN	DOWN	DOWN	DOWN	NOCHANGE	DOWN	NOCHANGE	DOWN	NOCHANGE	DOWN	NOCHANGE	NOCHANGE	NOCHANGE
ITGA5	NOCHANGE	NOCHANGE	UP	UP	UP	UP	NOCHANGE	UP	UP	UP	NOCHANGE	UP	NOCHANGE	NOCHANGE	NOCHANGE	UP	UP	UP	UP	UP	NOCHANGE	UP	NOCHANGE	UP	NOCHANGE	UP	NOCHANGE	UP	UP	NOCHANGE	UP	NOCHANGE	UP	UP	UP	UP	NOCHANGE	NOCHANGE	NOCHANGE	NOCHANGE	NOCHANGE	NOCHANGE	NOCHANGE	UP	UP	NOCHANGE	NOCHANGE	UP	NOCHANGE
BCL2	UP	UP	NOCHANGE	NOCHANGE	UP	NOCHANGE	UP	UP	UP	NOCHANGE	DOWN	DOWN	UP	UP	NOCHANGE	NOCHANGE	UP	NOCHANGE	DOWN	UP	UP	UP	UP	DOWN	UP	NOCHANGE	DOWN	DOWN	NOCHANGE	NOCHANGE	NOCHANGE	UP	UP	UP	UP	NOCHANGE	UP	UP	NOCHANGE	UP	NOCHANGE	NOCHANGE	UP	UP	NOCHANGE	NOCHANGE	NOCHANGE	UP	UP
PTK2	NOCHANGE	NOCHANGE	NOCHANGE	DOWN	NOCHANGE	UP	DOWN	NOCHANGE	NOCHANGE	NOCHANGE	NOCHANGE	UP	NOCHANGE	DOWN	NOCHANGE	NOCHANGE	DOWN	DOWN	DOWN	NOCHANGE	NOCHANGE	NOCHANGE	NOCHANGE	UP	NOCHANGE	DOWN	NOCHANGE	DOWN	NOCHANGE	NOCHANGE	NOCHANGE	NOCHANGE	NOCHANGE	NOCHANGE	NOCHANGE	NOCHANGE	DOWN	DOWN	DOWN	DOWN	DOWN	NOCHANGE	NOCHANGE	NOCHANGE	NOCHANGE	NOCHANGE	NOCHANGE	UP	DOWN
MTOR	DOWN	DOWN	NOCHANGE	NOCHANGE	DOWN	DOWN	DOWN	DOWN	NOCHANGE	DOWN	DOWN	NOCHANGE	DOWN	NOCHANGE	DOWN	DOWN	DOWN	DOWN	DOWN	NOCHANGE	DOWN	NOCHANGE	DOWN	DOWN	NOCHANGE	DOWN	DOWN	DOWN	DOWN	DOWN	DOWN	DOWN	NOCHANGE	NOCHANGE	DOWN	DOWN	DOWN	DOWN	DOWN	NOCHANGE	NOCHANGE	NOCHANGE	NOCHANGE	DOWN	NOCHANGE	DOWN	NOCHANGE	NOCHANGE	DOWN
CEACAM5	NOCHANGE	NOCHANGE	NOCHANGE	NOCHANGE	NOCHANGE	NOCHANGE	NOCHANGE	NOCHANGE	NOCHANGE	NOCHANGE	NOCHANGE	NOCHANGE	NOCHANGE	NOCHANGE	NOCHANGE	NOCHANGE	NOCHANGE	NOCHANGE	NOCHANGE	NOCHANGE	NOCHANGE	NOCHANGE	NOCHANGE	NOCHANGE	NOCHANGE	NOCHANGE	NOCHANGE	NOCHANGE	NOCHANGE	NOCHANGE	NOCHANGE	NOCHANGE	NOCHANGE	NOCHANGE	NOCHANGE	NOCHANGE	NOCHANGE	NOCHANGE	NOCHANGE	NOCHANGE	NOCHANGE	NOCHANGE	NOCHANGE	NOCHANGE	NOCHANGE	NOCHANGE	NOCHANGE	NOCHANGE	NOCHANGE
BMF	DOWN	NOCHANGE	NOCHANGE	NOCHANGE	NOCHANGE	NOCHANGE	NOCHANGE	NOCHANGE	NOCHANGE	NOCHANGE	NOCHANGE	NOCHANGE	NOCHANGE	NOCHANGE	NOCHANGE	DOWN	DOWN	NOCHANGE	DOWN	NOCHANGE	NOCHANGE	NOCHANGE	NOCHANGE	NOCHANGE	NOCHANGE	NOCHANGE	NOCHANGE	NOCHANGE	NOCHANGE	NOCHANGE	NOCHANGE	DOWN	DOWN	NOCHANGE	NOCHANGE	NOCHANGE	NOCHANGE	NOCHANGE	DOWN	NOCHANGE	DOWN	DOWN	NOCHANGE	DOWN	NOCHANGE	DOWN	NOCHANGE	NOCHANGE	NOCHANGE
CRYBA1	NOCHANGE	NOCHANGE	NOCHANGE	NOCHANGE	NOCHANGE	UP	NOCHANGE	NOCHANGE	NOCHANGE	NOCHANGE	UP	NOCHANGE	NOCHANGE	NOCHANGE	UP	NOCHANGE	NOCHANGE	NOCHANGE	UP	NOCHANGE	NOCHANGE	UP	UP	NOCHANGE	UP	NOCHANGE	NOCHANGE	NOCHANGE	NOCHANGE	NOCHANGE	NOCHANGE	NOCHANGE	NOCHANGE	NOCHANGE	NOCHANGE	UP	NOCHANGE	NOCHANGE	NOCHANGE	NOCHANGE	UP	NOCHANGE	NOCHANGE	NOCHANGE	NOCHANGE	NOCHANGE	UP	NOCHANGE	NOCHANGE
CAV1	UP	UP	UP	NOCHANGE	UP	UP	UP	UP	NOCHANGE	UP	UP	UP	UP	NOCHANGE	UP	UP	UP	UP	UP	UP	UP	UP	NOCHANGE	UP	NOCHANGE	UP	UP	NOCHANGE	UP	UP	UP	UP	UP	UP	UP	NOCHANGE	NOCHANGE	UP	NOCHANGE	UP	NOCHANGE	UP	UP	UP	UP	NOCHANGE	DOWN	UP	NOCHANGE
AKT1	NOCHANGE	NOCHANGE	NOCHANGE	NOCHANGE	NOCHANGE	UP	NOCHANGE	NOCHANGE	NOCHANGE	NOCHANGE	NOCHANGE	UP	UP	NOCHANGE	NOCHANGE	NOCHANGE	NOCHANGE	NOCHANGE	UP	NOCHANGE	NOCHANGE	NOCHANGE	NOCHANGE	UP	UP	NOCHANGE	NOCHANGE	NOCHANGE	NOCHANGE	NOCHANGE	NOCHANGE	NOCHANGE	NOCHANGE	NOCHANGE	NOCHANGE	UP	NOCHANGE	NOCHANGE	DOWN	DOWN	UP	NOCHANGE	NOCHANGE	NOCHANGE	NOCHANGE	NOCHANGE	NOCHANGE	NOCHANGE	NOCHANGE
SRC	NOCHANGE	NOCHANGE	NOCHANGE	NOCHANGE	NOCHANGE	NOCHANGE	UP	NOCHANGE	NOCHANGE	NOCHANGE	UP	NOCHANGE	DOWN	UP	UP	NOCHANGE	NOCHANGE	NOCHANGE	DOWN	NOCHANGE	NOCHANGE	UP	UP	NOCHANGE	NOCHANGE	NOCHANGE	NOCHANGE	UP	NOCHANGE	NOCHANGE	NOCHANGE	NOCHANGE	NOCHANGE	NOCHANGE	DOWN	NOCHANGE	NOCHANGE	UP	UP	NOCHANGE	NOCHANGE	NOCHANGE	NOCHANGE	DOWN	NOCHANGE	DOWN	UP	NOCHANGE	NOCHANGE
TFDP1	NOCHANGE	NOCHANGE	NOCHANGE	NOCHANGE	DOWN	NOCHANGE	NOCHANGE	NOCHANGE	NOCHANGE	DOWN	NOCHANGE	NOCHANGE	NOCHANGE	NOCHANGE	DOWN	DOWN	NOCHANGE	NOCHANGE	DOWN	NOCHANGE	NOCHANGE	NOCHANGE	NOCHANGE	NOCHANGE	NOCHANGE	DOWN	DOWN	DOWN	DOWN	NOCHANGE	NOCHANGE	NOCHANGE	NOCHANGE	NOCHANGE	NOCHANGE	NOCHANGE	NOCHANGE	NOCHANGE	DOWN	NOCHANGE	NOCHANGE	DOWN	NOCHANGE	NOCHANGE	DOWN	DOWN	NOCHANGE	NOCHANGE	NOCHANGE
AES	NOCHANGE	NOCHANGE	NOCHANGE	NOCHANGE	NOCHANGE	UP	UP	NOCHANGE	NOCHANGE	NOCHANGE	NOCHANGE	NOCHANGE	NOCHANGE	NOCHANGE	NOCHANGE	NOCHANGE	NOCHANGE	NOCHANGE	NOCHANGE	NOCHANGE	NOCHANGE	NOCHANGE	NOCHANGE	NOCHANGE	NOCHANGE	NOCHANGE	NOCHANGE	NOCHANGE	NOCHANGE	NOCHANGE	NOCHANGE	NOCHANGE	NOCHANGE	NOCHANGE	NOCHANGE	NOCHANGE	NOCHANGE	NOCHANGE	NOCHANGE	NOCHANGE	NOCHANGE	NOCHANGE	NOCHANGE	NOCHANGE	NOCHANGE	NOCHANGE	NOCHANGE	NOCHANGE	NOCHANGE
ZNF304	DOWN	DOWN	NOCHANGE	NOCHANGE	NOCHANGE	NOCHANGE	DOWN	NOCHANGE	UP	NOCHANGE	DOWN	NOCHANGE	UP	NOCHANGE	NOCHANGE	DOWN	NOCHANGE	NOCHANGE	DOWN	NOCHANGE	NOCHANGE	NOCHANGE	NOCHANGE	UP	UP	DOWN	NOCHANGE	DOWN	NOCHANGE	NOCHANGE	DOWN	NOCHANGE	NOCHANGE	NOCHANGE	NOCHANGE	DOWN	NOCHANGE	NOCHANGE	DOWN	NOCHANGE	NOCHANGE	NOCHANGE	NOCHANGE	NOCHANGE	NOCHANGE	NOCHANGE	NOCHANGE	NOCHANGE	DOWN
PTRH2	UP	UP	NOCHANGE	NOCHANGE	NOCHANGE	UP	UP	UP	NOCHANGE	NOCHANGE	UP	NOCHANGE	NOCHANGE	UP	NOCHANGE	UP	NOCHANGE	NOCHANGE	NOCHANGE	UP	NOCHANGE	UP	NOCHANGE	UP	NOCHANGE	NOCHANGE	NOCHANGE	UP	UP	UP	UP	UP	UP	NOCHANGE	UP	NOCHANGE	NOCHANGE	UP	UP	NOCHANGE	NOCHANGE	UP	NOCHANGE	NOCHANGE	NOCHANGE	NOCHANGE	NOCHANGE	NOCHANGE	UP
SNAI2	DOWN	NOCHANGE	NOCHANGE	NOCHANGE	NOCHANGE	NOCHANGE	NOCHANGE	NOCHANGE	NOCHANGE	NOCHANGE	DOWN	NOCHANGE	NOCHANGE	DOWN	NOCHANGE	NOCHANGE	NOCHANGE	NOCHANGE	NOCHANGE	NOCHANGE	DOWN	NOCHANGE	NOCHANGE	UP	NOCHANGE	NOCHANGE	NOCHANGE	NOCHANGE	NOCHANGE	NOCHANGE	NOCHANGE	DOWN	NOCHANGE	NOCHANGE	UP	NOCHANGE	DOWN	DOWN	NOCHANGE	NOCHANGE	NOCHANGE	NOCHANGE	NOCHANGE	NOCHANGE	NOCHANGE	NOCHANGE	DOWN	NOCHANGE	DOWN
MYBBP1A	UP	NOCHANGE	UP	NOCHANGE	NOCHANGE	NOCHANGE	UP	UP	NOCHANGE	NOCHANGE	UP	UP	NOCHANGE	UP	UP	NOCHANGE	UP	NOCHANGE	UP	NOCHANGE	NOCHANGE	NOCHANGE	UP	NOCHANGE	UP	NOCHANGE	NOCHANGE	NOCHANGE	UP	NOCHANGE	UP	UP	NOCHANGE	NOCHANGE	NOCHANGE	UP	UP	UP	NOCHANGE	UP	NOCHANGE	NOCHANGE	NOCHANGE	NOCHANGE	UP	NOCHANGE	NOCHANGE	NOCHANGE	UP
MCL1	NOCHANGE	NOCHANGE	NOCHANGE	NOCHANGE	NOCHANGE	NOCHANGE	NOCHANGE	NOCHANGE	NOCHANGE	NOCHANGE	NOCHANGE	NOCHANGE	NOCHANGE	NOCHANGE	NOCHANGE	NOCHANGE	NOCHANGE	NOCHANGE	NOCHANGE	NOCHANGE	NOCHANGE	NOCHANGE	NOCHANGE	NOCHANGE	NOCHANGE	NOCHANGE	NOCHANGE	NOCHANGE	NOCHANGE	NOCHANGE	NOCHANGE	NOCHANGE	NOCHANGE	NOCHANGE	NOCHANGE	NOCHANGE	NOCHANGE	NOCHANGE	NOCHANGE	NOCHANGE	NOCHANGE	NOCHANGE	NOCHANGE	UP	NOCHANGE	NOCHANGE	DOWN	NOCHANGE	NOCHANGE
SIK1	DOWN	NOCHANGE	NOCHANGE	NOCHANGE	NOCHANGE	NOCHANGE	NOCHANGE	NOCHANGE	NOCHANGE	NOCHANGE	NOCHANGE	NOCHANGE	DOWN	NOCHANGE	NOCHANGE	NOCHANGE	NOCHANGE	NOCHANGE	NOCHANGE	NOCHANGE	NOCHANGE	NOCHANGE	NOCHANGE	NOCHANGE	NOCHANGE	NOCHANGE	NOCHANGE	NOCHANGE	NOCHANGE	NOCHANGE	NOCHANGE	NOCHANGE	NOCHANGE	NOCHANGE	NOCHANGE	NOCHANGE	DOWN	NOCHANGE	NOCHANGE	NOCHANGE	NOCHANGE	NOCHANGE	NOCHANGE	NOCHANGE	NOCHANGE	NOCHANGE	NOCHANGE	NOCHANGE	NOCHANGE
CHEK2	UP	NOCHANGE	NOCHANGE	UP	NOCHANGE	NOCHANGE	NOCHANGE	UP	NOCHANGE	NOCHANGE	UP	NOCHANGE	NOCHANGE	UP	UP	UP	UP	UP	UP	NOCHANGE	NOCHANGE	UP	NOCHANGE	NOCHANGE	NOCHANGE	NOCHANGE	UP	UP	UP	NOCHANGE	NOCHANGE	UP	UP	UP	NOCHANGE	NOCHANGE	UP	UP	NOCHANGE	NOCHANGE	NOCHANGE	NOCHANGE	NOCHANGE	NOCHANGE	UP	NOCHANGE	NOCHANGE	UP	NOCHANGE
ITGB1	NOCHANGE	NOCHANGE	UP	NOCHANGE	NOCHANGE	NOCHANGE	NOCHANGE	NOCHANGE	NOCHANGE	NOCHANGE	NOCHANGE	UP	UP	NOCHANGE	NOCHANGE	NOCHANGE	NOCHANGE	UP	UP	UP	NOCHANGE	UP	NOCHANGE	UP	NOCHANGE	NOCHANGE	NOCHANGE	NOCHANGE	NOCHANGE	NOCHANGE	NOCHANGE	NOCHANGE	UP	NOCHANGE	UP	NOCHANGE	NOCHANGE	NOCHANGE	DOWN	NOCHANGE	NOCHANGE	NOCHANGE	NOCHANGE	NOCHANGE	UP	DOWN	NOCHANGE	UP	NOCHANGE
IKBKG	NOCHANGE	NOCHANGE	UP	UP	NOCHANGE	DOWN	UP	UP	NOCHANGE	NOCHANGE	NOCHANGE	NOCHANGE	UP	UP	UP	NOCHANGE	UP	NOCHANGE	NOCHANGE	NOCHANGE	NOCHANGE	UP	UP	NOCHANGE	NOCHANGE	UP	NOCHANGE	UP	NOCHANGE	NOCHANGE	UP	NOCHANGE	NOCHANGE	UP	NOCHANGE	NOCHANGE	NOCHANGE	UP	UP	NOCHANGE	UP	NOCHANGE	UP	NOCHANGE	UP	NOCHANGE	NOCHANGE	NOCHANGE	UP
E2F1	NOCHANGE	NOCHANGE	NOCHANGE	UP	NOCHANGE	NOCHANGE	NOCHANGE	NOCHANGE	NOCHANGE	NOCHANGE	UP	NOCHANGE	NOCHANGE	NOCHANGE	NOCHANGE	NOCHANGE	UP	UP	NOCHANGE	NOCHANGE	UP	UP	NOCHANGE	NOCHANGE	UP	UP	UP	NOCHANGE	NOCHANGE	UP	NOCHANGE	NOCHANGE	NOCHANGE	NOCHANGE	NOCHANGE	UP	UP	UP	NOCHANGE	NOCHANGE	NOCHANGE	NOCHANGE	NOCHANGE	NOCHANGE	UP	NOCHANGE	NOCHANGE	NOCHANGE	NOCHANGE
BRMS1	NOCHANGE	NOCHANGE	NOCHANGE	NOCHANGE	NOCHANGE	UP	UP	NOCHANGE	NOCHANGE	NOCHANGE	NOCHANGE	NOCHANGE	NOCHANGE	UP	NOCHANGE	NOCHANGE	NOCHANGE	NOCHANGE	NOCHANGE	NOCHANGE	NOCHANGE	NOCHANGE	NOCHANGE	NOCHANGE	NOCHANGE	NOCHANGE	NOCHANGE	UP	NOCHANGE	NOCHANGE	NOCHANGE	NOCHANGE	NOCHANGE	NOCHANGE	NOCHANGE	NOCHANGE	NOCHANGE	NOCHANGE	NOCHANGE	NOCHANGE	NOCHANGE	NOCHANGE	NOCHANGE	NOCHANGE	NOCHANGE	NOCHANGE	NOCHANGE	NOCHANGE	UP
TSC2	NOCHANGE	NOCHANGE	NOCHANGE	NOCHANGE	UP	NOCHANGE	NOCHANGE	NOCHANGE	UP	NOCHANGE	UP	UP	NOCHANGE	NOCHANGE	UP	NOCHANGE	UP	NOCHANGE	NOCHANGE	NOCHANGE	NOCHANGE	NOCHANGE	UP	NOCHANGE	UP	UP	UP	NOCHANGE	NOCHANGE	NOCHANGE	NOCHANGE	NOCHANGE	NOCHANGE	UP	NOCHANGE	UP	NOCHANGE	NOCHANGE	NOCHANGE	NOCHANGE	NOCHANGE	NOCHANGE	NOCHANGE	NOCHANGE	NOCHANGE	UP	NOCHANGE	NOCHANGE	NOCHANGE
[truncated: 490 more columns]

## Sheet: HDAC
gene	nominal.p.value	adjusted.p.value
DNMT1	3.70712e-22	2.22427e-21
HDAC1	3.52723e-11	6.04668e-11
HDAC2	1.42517e-21	5.70067e-21
HDAC3	4.51902e-12	9.03804e-12
HDAC4	1.42765e-16	4.28296e-16
HDAC5	2.22522e-13	5.34052e-13
HDAC6	0.373817	0.373817
HDAC7	5.01848e-09	6.6913e-09
HDAC8	1.57411e-05	1.88893e-05
HDAC9	3.55063e-26	4.26075e-25
HDAC10	3.73322e-10	5.59982e-10
HDAC11	0.00253474	0.00276517

## Sheet: SIRT
gene	nominal.p.value	adjusted.p.value
SIRT1	1.94175e-34	1.35922e-33
SIRT2	0.0674803	0.0787271
SIRT3	0.000208974	0.000292563
SIRT4	0.144759	0.144759
SIRT5	4.61063e-08	8.06859e-08
SIRT6	7.53339e-23	2.63669e-22
SIRT7	1.02628e-09	2.39466e-09

## Sheet: oncogene
gene	nominal.p.value	adjusted.p.value
VHL	5.99e-22	8.98e-22
EGFR	4.43e-23	7.38e-23
CCND1	4.38e-16	5.98e-16
CTNNB1	8.65e-49	1.07e-47
HRAS	1.43e-25	2.69e-25
BRAF	1.55e-35	4.66e-35
PTEN	5.67e-28	1.21e-27
AKT1	2.89e-14	3.61e-14
MYC	2.45e-07	2.83e-07
KRAS	3.17e-38	1.19e-37
STAT3	7.58e-33	1.9e-32
MTOR	1.88e-39	9.38e-39
TP53	3.35e-07	3.59e-07
PIK3CA	1.43e-48	1.07e-47
VEGFA	5.69e-07	5.69e-07
