# Supplementary material for: The role and therapeutic significance of the anoikis pathway in renal clear cell carcinoma
Source: Front Oncol. 2022 Sep 29;12:1009984. doi: 10.3389/fonc.2022.1009984 (PMC9557223; doi:10.3389/fonc.2022.1009984)
Supplement: Supplementary file 3 [file Table_3.xlsx]

## Sheet: immunotherapy predicted pathway
Signature	Genes
IFN-Gamma_signature	TIGIT, CD27, CD8A, PDCD1LG2, LAG3, CD274, CXCR6, CMKLR1, NKG7, CCL5, PSMB10, IDO1, CXCL9, HLA-DQA1, CD276, STAT1, HLA-DRB1, HLA-E
APM_signal	B2M, HLA-A, HLA-B, HLA-C, TAP1, TAP2
Base_excision_repair	FEN1, LIG1, NEIL3, PARP1, PARP2, PCNA, POLE, POLE2, UNG
Cell_cycle	BUB1, BUB1B, CCNA2, CCNB2, CCNE1, CCNE2, CDC20, CDC25A, CDC25C, CDC6, CDK1, CDK2, CDKN2A, DBF4, E2F1, E2F2, ESPL1, MAD2L1, MAD2L2, MCM2, MCM4, MCM6, MCM7, ORC1, ORC6, PCNA, PLK1, SKP2, SMC3, TFDP1, TTK, YWHAB
DNA_replication	DNA2, FEN1, LIG1, MCM2, MCM4, MCM6, MCM7, PCNA, POLA2, POLE, POLE2, PRIM1, PRIM2, RFC2, RFC3, RFC4, RFC5, RNASEH2A, RPA1, RPA3
Fanconi_anemia_pathway	BLM, BRCA1, BRCA2, BRIP1, EME1, ERCC4, FANCA, FANCB, FANCD2, FANCI, PALB2, RAD51, RAD51C, RMI1, RMI2, RPA1, RPA3, TOP3A, UBE2T
Homologous_recombination	BLM, BRCA2, EME1, RAD51, RAD51C, RAD54L, RPA1, RPA3, TOP3A, XRCC2, XRCC3
MicroRNAs_in_cancer	BRCA1, CCNE1, CCNE2, CDC25A, CDC25C, CDCA5, CDKN2A, DNMT1, E2F1, E2F2, EZH2, KIF23, STMN1, TRIM71
Mismatch_repair	EXO1, LIG1, PCNA, RFC2, RFC3, RFC4, RFC5, RPA1, RPA3
Nucleotide_excision_repair	CETN2, ERCC4, LIG1, PCNA, POLE, POLE2, RFC2, RFC3, RFC4, RFC5, RPA1, RPA3
Oocyte_meiosis	AURKA, BUB1, CCNB2, CCNE1, CCNE2, CDC20, CDC25C, CDK1, CDK2, ESPL1, FBXO5, MAD2L1, MAD2L2, PLK1, SGOL1, SMC3, YWHAB
p53_signaling_pathway	CCNB2, CCNE1, CCNE2, CDK1, CDK2, CDKN2A, GTSE1, PPM1D, RFWD2, RRM2
Progesterone-mediated_oocyte_maturation	BUB1, CCNA2, CCNB2, CDC25A, CDC25C, CDK1, CDK2, MAD2L1, MAD2L2, PLK1
Proteasome	IFNG, PSMA4, PSMB2, PSMB4, PSMC4, PSMD4, PSMD7
Pyrimidine_metabolism	CTPS1, DTYMK, POLA2, POLE, POLE2, PRIM1, PRIM2, RRM2, TYMS
Spliceosome	HNRNPM, LSM3, LSM4, LSM5, MAGOHB, PRPF19, SF3B2, SF3B3, SF3B4, SNRNP40, SNRPA1, SNRPC, USP39, WBP11
Systemic_lupus_erythematosus	H2AFV, H2AFZ, HIST1H2AB, HIST1H2AG, HIST1H2AH, HIST1H2AI, HIST1H2AM, HIST1H2BC, HIST1H2BD, HIST1H2BF, HIST1H2BJ, HIST1H2BK, HIST1H2BL, HIST1H2BN, HIST1H2BO, HIST1H3B, HIST1H3D, HIST1H3H, HIST1H4A, HIST1H4B, HIST2H2AB, HIST2H2AC, HIST2H2BE, HIST2H2BF, HIST
Viral_carcinogenesis	CCNA2, CCNE1, CCNE2, CDC20, CDK1, CDK2, CDKN2A, CREB3L4, GTF2E1, HIST1H2BC, HIST1H2BD, HIST1H2BF, HIST1H2BJ, HIST1H2BK, HIST1H2BL, HIST1H2BN, HIST1H2BO, HIST1H4A, HIST1H4B, HIST2H2BE, HIST2H2BF, SKP2, YWHAB

## Sheet: KIRC pathway
Signature
Urothelial_differentiation
Ta_pathway
Luminal_differentiation
Basal_differentiation
EMT_differentiation
Immune_differentiation
Smooth_muscle
Myofibroblasts
Interferon_response
Mitochondria
Keratinization
Neuroendocrine_differentiation
