# Supplementary material for: The role and therapeutic significance of the anoikis pathway in renal clear cell carcinoma
Source: Front Oncol. 2022 Sep 29;12:1009984. doi: 10.3389/fonc.2022.1009984 (PMC9557223; doi:10.3389/fonc.2022.1009984)
Supplement: Supplementary file 4 [file Table_4.xlsx]

## Sheet: ssGSEA
	aDCs	APC_co_inhibition	APC_co_stimulation	B_cells	CCR	CD8+_T_cells	Check-point	Cytolytic_activity	DCs	HLA	iDCs	Inflammation-promoting	Macrophages	Mast_cells	MHC_class_I	Neutrophils	NK_cells	Parainflammation	pDCs	T_cell_co-inhibition	T_cell_co-stimulation	T_helper_cells	Tfh	Th1_cells	Th2_cells	TIL	Treg	Type_I_IFN_Reponse	Type_II_IFN_Reponse
TCGA-A3-3306-01A-01R-0864-07	0.557499	0.793575	0.783456	0.687235	0.684012	0.804172	0.745543	0.894283	0.693062	0.942009	0.610254	0.781998	0.786599	0.673271	0.986276	0.802411	0.705403	0.842415	0.726817	0.74563	0.714422	0.943869	0.583886	0.671271	0.666295	0.791871	0.833212	0.833276	0.799255
TCGA-A3-3329-01A-01R-0864-07	0.610833	0.813531	0.815756	0.668715	0.694093	0.893143	0.786088	0.918703	0.674084	0.958119	0.603927	0.805257	0.798677	0.625731	0.996588	0.795848	0.67272	0.847979	0.768065	0.772244	0.768273	0.954108	0.627962	0.651164	0.700697	0.817843	0.846414	0.835049	0.817748
TCGA-B8-5550-01A-01R-1541-07	0.580124	0.838162	0.792608	0.641471	0.695086	0.870895	0.769438	0.888052	0.733771	0.944845	0.683093	0.784125	0.854684	0.718979	0.99449	0.793274	0.639747	0.869901	0.750348	0.749767	0.742714	0.968691	0.66267	0.635919	0.661556	0.800264	0.846311	0.793827	0.839699
TCGA-A3-3378-01A-02R-1325-07	0.610786	0.879249	0.791531	0.736491	0.712036	0.945992	0.796069	0.923016	0.645081	0.978649	0.594826	0.823321	0.882773	0.642606	0.997313	0.860821	0.641699	0.889245	0.755212	0.823181	0.795559	0.987048	0.77569	0.717622	0.68119	0.857747	0.860593	0.815343	0.833354
TCGA-A3-3343-01A-01R-0864-07	0.725909	0.81976	0.804598	0.693145	0.700735	0.805783	0.793137	0.950551	0.76659	0.951332	0.668912	0.811972	0.824209	0.684831	0.995148	0.825562	0.706831	0.870051	0.774878	0.778529	0.766481	0.976199	0.611177	0.67832	0.699434	0.826101	0.839054	0.854918	0.845916
TCGA-B0-5100-01A-01R-1420-07	0.535706	0.777643	0.721558	0.641594	0.661002	0.73619	0.70215	0.875592	0.58491	0.896759	0.435983	0.718583	0.754382	0.705997	0.976558	0.771738	0.630118	0.844762	0.708719	0.642304	0.679556	0.891866	0.506899	0.559859	0.652272	0.741834	0.807126	0.833638	0.816144
TCGA-CJ-4869-01A-02R-1426-07	0.629484	0.850451	0.807814	0.757379	0.724723	0.986753	0.817083	0.983556	0.762597	0.974339	0.728201	0.882405	0.825713	0.725877	0.997516	0.810324	0.705356	0.881603	0.820627	0.825994	0.828036	0.982036	0.798747	0.745949	0.751146	0.875629	0.857586	0.851887	0.826936
TCGA-CJ-4895-01A-01R-1305-07	0.598692	0.810697	0.762214	0.637608	0.709663	0.898862	0.763906	0.929732	0.67844	0.964702	0.514072	0.807527	0.865061	0.599262	0.993657	0.789354	0.66311	0.885747	0.774481	0.753792	0.757544	0.972072	0.721175	0.689949	0.705896	0.816656	0.841035	0.871954	0.814659
TCGA-B0-5691-01A-11R-1541-07	0.580547	0.819553	0.762924	0.748653	0.696262	0.837091	0.761593	0.884631	0.740733	0.939898	0.686762	0.786441	0.810231	0.768958	0.991812	0.809021	0.608615	0.868118	0.76138	0.745421	0.726809	0.965036	0.676543	0.637797	0.688054	0.817737	0.83764	0.831857	0.852795
TCGA-B0-5121-01A-02R-1420-07	0.589194	0.804061	0.793483	0.678794	0.686212	0.886382	0.766022	0.967643	0.662906	0.935938	0.3327	0.81529	0.818841	0.774014	0.992754	0.816617	0.71433	0.861793	0.742798	0.7305	0.758054	0.966254	0.649274	0.661251	0.650772	0.817494	0.831968	0.855352	0.86184
TCGA-B0-5098-01A-01R-1420-07	0.709458	0.645114	0.651738	0.522719	0.634437	0.773434	0.63618	0.730523	0.487044	0.873681	0.433853	0.705927	0.76661	0.454277	0.990017	0.688331	0.374162	0.8305	0.614591	0.579941	0.597817	0.769071	0.564474	0.53997	0.48022	0.65884	0.786023	0.805044	0.68234
TCGA-A3-3308-01A-02R-1325-07	0.600131	0.82796	0.765677	0.624427	0.68261	0.799534	0.742642	0.859804	0.723449	0.934069	0.534039	0.754542	0.813997	0.657675	0.990539	0.761031	0.535462	0.866754	0.734158	0.734647	0.723506	0.96252	0.55708	0.607071	0.603047	0.791135	0.831194	0.831925	0.852088
TCGA-BP-4807-01A-01R-1305-07	0.740257	0.820055	0.787761	0.683387	0.705181	0.771586	0.754794	0.852528	0.745343	0.949822	0.682249	0.748528	0.871955	0.756538	0.988252	0.809475	0.675032	0.869647	0.760152	0.721894	0.704315	0.975079	0.568489	0.659345	0.640364	0.792956	0.837813	0.854697	0.837434
TCGA-B0-5707-01A-11R-1541-07	0.574969	0.764531	0.760656	0.678735	0.685967	0.76799	0.72283	0.800583	0.72244	0.942075	0.72381	0.724896	0.855162	0.77372	0.985458	0.762076	0.530341	0.838663	0.741232	0.688675	0.678067	0.932804	0.648211	0.614799	0.578811	0.76951	0.815162	0.77702	0.802156
TCGA-BP-4971-01A-01R-1334-07	0.83086	0.852378	0.807508	0.682436	0.699046	0.831294	0.79077	0.892413	0.773489	0.972456	0.747142	0.802575	0.861169	0.663012	0.995832	0.790346	0.603412	0.875023	0.734966	0.786006	0.809724	0.982744	0.606368	0.696298	0.633419	0.839109	0.837964	0.834463	0.783231
TCGA-B8-4620-01A-02R-1325-07	0.644638	0.83346	0.775315	0.642339	0.707483	0.770741	0.764771	0.864132	0.696276	0.942387	0.496044	0.745777	0.85983	0.668894	0.990488	0.853177	0.632829	0.888306	0.753098	0.74937	0.738197	0.961243	0.600617	0.624802	0.670303	0.794124	0.849234	0.895089	0.812642
TCGA-BP-4967-01A-01R-1334-07	0.587211	0.764548	0.773366	0.641502	0.667677	0.820917	0.739022	0.878104	0.641946	0.936067	0.531397	0.735195	0.831461	0.739637	0.985437	0.766677	0.665458	0.850683	0.718618	0.705217	0.683847	0.948036	0.517337	0.613828	0.613901	0.778338	0.833919	0.808574	0.845184
TCGA-BP-5198-01A-01R-1426-07	0.585075	0.812475	0.791878	0.720293	0.720096	0.889311	0.781256	0.913641	0.722826	0.945075	0.653336	0.79263	0.881928	0.647731	0.993354	0.797997	0.649731	0.869616	0.749718	0.769268	0.767845	0.971639	0.704693	0.675971	0.706048	0.828003	0.850243	0.806271	0.830804
TCGA-BP-4326-01A-01R-1289-07	0.563702	0.79581	0.722935	0.634822	0.691814	0.782238	0.73153	0.873485	0.6708	0.918156	0.46699	0.74733	0.827718	0.770347	0.989634	0.811758	0.639016	0.867671	0.6966	0.720961	0.699338	0.942768	0.589589	0.573468	0.641179	0.77536	0.834145	0.823891	0.868458
TCGA-CJ-4904-01A-02R-1426-07	0.605039	0.829179	0.761929	0.679969	0.701894	0.880938	0.762067	0.925489	0.751158	0.948236	0.612558	0.822189	0.840955	0.710488	0.996406	0.804504	0.644199	0.880207	0.779881	0.756726	0.739537	0.960771	0.638764	0.653835	0.660648	0.813039	0.848028	0.83503	0.852682
TCGA-CZ-4853-01A-01R-1426-07	0.600063	0.807141	0.786244	0.675492	0.685679	0.766751	0.762848	0.895511	0.684944	0.946351	0.633511	0.775261	0.78181	0.648814	0.991182	0.780543	0.689711	0.852895	0.751246	0.752042	0.74659	0.948271	0.524244	0.676785	0.658441	0.79887	0.82954	0.823734	0.831294
TCGA-A3-3387-01A-01R-1541-07	0.573822	0.81204	0.792103	0.68781	0.701749	0.801617	0.766389	0.877283	0.740793	0.949523	0.768012	0.758439	0.837961	0.704418	0.991863	0.812861	0.661114	0.870418	0.750644	0.748593	0.751808	0.977496	0.592317	0.67154	0.643957	0.818734	0.848007	0.840968	0.847204
TCGA-A3-3326-01A-01R-0864-07	0.650315	0.850438	0.784212	0.711762	0.70272	0.825044	0.792658	0.929841	0.761925	0.956394	0.803113	0.813084	0.83587	0.781088	0.996693	0.822877	0.628329	0.863142	0.782727	0.78915	0.784912	0.984807	0.560882	0.675245	0.673368	0.846835	0.846455	0.870961	0.806882
TCGA-BP-4784-01A-01R-1305-07	0.565948	0.778268	0.731313	0.703892	0.686959	0.76457	0.728339	0.809243	0.820937	0.915051	0.730663	0.720883	0.823334	0.770745	0.985626	0.761488	0.592257	0.868134	0.720118	0.668259	0.692536	0.925709	0.571737	0.575475	0.637427	0.759136	0.836651	0.83708	0.869866
TCGA-BP-4766-01A-01R-1289-07	0.601877	0.763445	0.738368	0.635293	0.67304	0.702897	0.715151	0.871904	0.62263	0.918458	0.523588	0.704397	0.830757	0.652106	0.989833	0.828767	0.624466	0.828385	0.746825	0.680592	0.669994	0.962127	0.509008	0.589353	0.541369	0.772377	0.815109	0.774283	0.848145
TCGA-CZ-5456-01A-01R-1503-07	0.62156	0.795938	0.823024	0.730949	0.707425	0.892711	0.778642	0.914276	0.6814	0.947275	0.613856	0.782398	0.872731	0.539945	0.989776	0.800283	0.734688	0.861026	0.78115	0.750652	0.772692	0.971738	0.670638	0.631091	0.694581	0.83445	0.84719	0.788784	0.842593
TCGA-CZ-4857-01A-01R-1305-07	0.69172	0.794099	0.777826	0.675305	0.699294	0.849395	0.758244	0.895098	0.687738	0.917141	0.536959	0.8094	0.860706	0.672269	0.992085	0.779371	0.643756	0.859991	0.761533	0.746627	0.750612	0.975452	0.658201	0.638025	0.695789	0.810769	0.847932	0.804829	0.807594
TCGA-B0-5400-01A-01R-1503-07	0.601572	0.830775	0.785901	0.64615	0.715939	0.903363	0.774869	0.935336	0.661205	0.971295	0.490567	0.792396	0.873741	0.716408	0.994562	0.81655	0.724201	0.878754	0.763231	0.766919	0.776412	0.950315	0.617375	0.655275	0.674314	0.81276	0.833971	0.801081	0.800033
TCGA-BP-5010-01A-02R-1420-07	0.575627	0.775667	0.783444	0.652532	0.705524	0.891217	0.76143	0.917439	0.690366	0.926357	0.351092	0.781721	0.812611	0.520857	0.986199	0.769174	0.68546	0.867093	0.724874	0.743974	0.763903	0.922545	0.629687	0.664497	0.61618	0.798353	0.827024	0.823427	0.86624
TCGA-CJ-4644-01A-02R-1325-07	0.71755	0.814455	0.788544	0.687458	0.700431	0.946856	0.78053	0.959914	0.660215	0.960426	0.608439	0.827334	0.81603	0.669773	0.9955	0.805031	0.685996	0.876163	0.761005	0.784497	0.759472	0.965645	0.701113	0.677132	0.715248	0.826543	0.842001	0.867185	0.838587
TCGA-CJ-6033-01A-11R-1672-07	0.58851	0.805812	0.781256	0.639852	0.693496	0.85761	0.755463	0.919758	0.651051	0.921924	0.547569	0.769015	0.828987	0.691616	0.989806	0.784372	0.629246	0.86864	0.734173	0.722311	0.734926	0.957744	0.597711	0.616824	0.715253	0.79166	0.837016	0.83924	0.819002
TCGA-EU-5907-01A-11R-1672-07	0.592311	0.839084	0.80517	0.588652	0.692722	0.759833	0.748544	0.810991	0.659475	0.920179	0.304535	0.748679	0.814091	0.682444	0.991928	0.731944	0.576669	0.862209	0.733938	0.719812	0.69655	0.935988	0.5713	0.635396	0.704692	0.756514	0.829301	0.868991	0.847223
TCGA-B4-5836-01A-11R-1672-07	0.541266	0.819475	0.771982	0.68944	0.701936	0.850554	0.764976	0.959875	0.680566	0.950847	0.585861	0.798433	0.809205	0.783772	0.995123	0.818886	0.753919	0.882935	0.767493	0.748797	0.735199	0.960673	0.636396	0.658302	0.682357	0.811803	0.838958	0.854313	0.849397
TCGA-A3-3323-01A-02R-1325-07	0.709409	0.812115	0.770141	0.657735	0.688853	0.861658	0.762885	0.914428	0.650675	0.952619	0.521395	0.785942	0.828024	0.707773	0.991739	0.808688	0.656889	0.870912	0.748649	0.749148	0.75586	0.980405	0.581857	0.658341	0.654899	0.821354	0.841119	0.83845	0.857426
TCGA-BP-4353-01A-02R-1289-07	0.59843	0.843493	0.77586	0.641838	0.692015	0.917867	0.765849	0.940476	0.68359	0.913179	0.510192	0.817452	0.856525	0.776008	0.990564	0.791651	0.695656	0.877235	0.756541	0.766952	0.74846	0.9807	0.5992	0.661458	0.698024	0.824542	0.846304	0.835268	0.894447
TCGA-B0-5077-01A-01R-1334-07	0.599388	0.776585	0.764664	0.622518	0.672156	0.885616	0.743317	0.915237	0.613286	0.96493	0.480529	0.791828	0.850348	0.651962	0.993528	0.740589	0.735971	0.850458	0.717557	0.722911	0.735048	0.96026	0.601992	0.60799	0.571646	0.789882	0.825771	0.823518	0.807864
TCGA-CZ-5984-01A-11R-1672-07	0.602732	0.777167	0.792307	0.693872	0.707478	0.83037	0.7713	0.892606	0.737182	0.956473	0.878806	0.787827	0.782517	0.624506	0.988412	0.772219	0.695754	0.867239	0.744207	0.75121	0.781528	0.972878	0.594992	0.682678	0.700618	0.831063	0.852949	0.836854	0.823801
TCGA-B8-A54G-01A-11R-A266-07	0.755305	0.840131	0.79826	0.700733	0.704806	0.988797	0.814395	0.983555	0.723248	0.987815	0.736749	0.852816	0.832092	0.491723	0.999195	0.817182	0.732636	0.87303	0.792747	0.823303	0.822996	0.989917	0.769321	0.791272	0.740511	0.874459	0.861421	0.87286	0.779989
TCGA-B0-4713-01A-01R-1277-07	0.561352	0.736542	0.780456	0.662528	0.689167	0.898587	0.757837	0.941498	0.675123	0.930123	0.557591	0.820595	0.799362	0.595279	0.993631	0.772319	0.756787	0.853425	0.697609	0.75597	0.75546	0.927419	0.663451	0.664036	0.687438	0.808501	0.817579	0.839997	0.783946
TCGA-CZ-5463-01A-01R-1503-07	0.62076	0.81687	0.787212	0.669115	0.681951	0.892966	0.761538	0.904932	0.680949	0.940133	0.559952	0.800072	0.825496	0.628264	0.996576	0.77389	0.669113	0.853511	0.75061	0.758834	0.714935	0.948645	0.630763	0.698413	0.648316	0.796593	0.839706	0.82241	0.794274
TCGA-6D-AA2E-01A-11R-A37O-07	0.584313	0.857366	0.720118	0.675736	0.671862	0.836757	0.707221	0.857335	0.68205	0.926462	0.651681	0.694823	0.832697	0.721932	0.982719	0.752989	0.659893	0.83814	0.706882	0.734498	0.692122	0.918516	0.512784	0.5995	0.596869	0.780191	0.811538	0.811063	0.77869
TCGA-CJ-6032-01A-11R-1672-07	0.589602	0.80895	0.785673	0.625113	0.691611	0.907038	0.760215	0.907304	0.634367	0.946575	0.541239	0.794124	0.809818	0.634162	0.994224	0.78424	0.581979	0.857988	0.731313	0.733623	0.729091	0.941373	0.592286	0.633379	0.664807	0.788394	0.839352	0.834379	0.842411
TCGA-BP-4801-01A-02R-1420-07	0.610801	0.862446	0.80238	0.698976	0.71184	0.872409	0.778524	0.926034	0.7565	0.965206	0.671415	0.800802	0.888239	0.83898	0.991533	0.807837	0.700363	0.877786	0.788089	0.760593	0.742824	0.983569	0.641546	0.673086	0.660734	0.822157	0.841021	0.815367	0.880979
TCGA-EU-5904-01A-11R-1672-07	0.598062	0.830932	0.790037	0.684308	0.702584	0.837976	0.761606	0.885409	0.743389	0.943392	0.696165	0.788565	0.799057	0.782811	0.992305	0.829408	0.587724	0.860851	0.732434	0.716513	0.729909	0.957823	0.675665	0.639734	0.642772	0.805662	0.839257	0.814404	0.88118
TCGA-B8-5158-01A-01R-1420-07	0.585044	0.813001	0.795129	0.665115	0.711887	0.926751	0.775517	0.920949	0.743995	0.946496	0.879736	0.813641	0.860758	0.613556	0.990662	0.819919	0.643398	0.87328	0.772932	0.76136	0.763726	0.977673	0.687374	0.698422	0.707856	0.828331	0.849891	0.821749	0.809801
TCGA-BP-4969-01A-01R-1334-07	0.615927	0.780352	0.709106	0.580713	0.646895	0.725224	0.69042	0.846511	0.595026	0.896424	0.473681	0.722636	0.749397	0.692112	0.990356	0.705724	0.564517	0.824214	0.658944	0.661927	0.635648	0.895305	0.478518	0.558015	0.500659	0.728332	0.791363	0.823752	0.850484
TCGA-B8-5546-01A-01R-1541-07	0.559548	0.725653	0.675486	0.661792	0.637059	0.793795	0.660302	0.831799	0.517637	0.91175	0.298516	0.670943	0.768609	0.552436	0.978678	0.715349	0.580918	0.794652	0.666295	0.6597	0.640423	0.855684	0.322367	0.549783	0.588508	0.734678	0.807044	0.783129	0.79736
TCGA-B4-5844-01A-11R-1672-07	0.570811	0.803728	0.756853	0.672945	0.672755	0.768167	0.733893	0.897451	0.621359	0.917195	0.5137	0.744431	0.775188	0.742685	0.989968	0.801105	0.644364	0.852645	0.729481	0.713883	0.68201	0.928362	0.516106	0.625753	0.56117	0.777823	0.827151	0.829752	0.866403
TCGA-CZ-5452-01A-01R-1503-07	0.726577	0.835587	0.808854	0.780173	0.714317	0.984689	0.81698	0.97889	0.738877	0.980567	0.620024	0.86929	0.851989	0.590256	0.998542	0.807241	0.690071	0.865095	0.820453	0.828344	0.826516	0.977634	0.808469	0.740556	0.747646	0.880404	0.851099	0.851924	0.812643
TCGA-BP-4991-01A-01R-1334-07	0.608217	0.809126	0.768579	0.665994	0.67439	0.759421	0.741642	0.902971	0.679291	0.9271	0.579309	0.771747	0.819986	0.738497	0.992037	0.809249	0.676173	0.867636	0.751638	0.713382	0.715219	0.968377	0.563192	0.634977	0.59439	0.790547	0.837582	0.851622	0.855124
TCGA-A3-3316-01A-01R-0864-07	0.624091	0.789144	0.787814	0.650721	0.695685	0.798315	0.743056	0.849106	0.675153	0.933045	0.518338	0.742834	0.870469	0.69827	0.982686	0.814124	0.638807	0.868672	0.730357	0.718095	0.716466	0.966412	0.514747	0.584399	0.633827	0.785024	0.837713	0.775969	0.866516
TCGA-B8-A54E-01A-11R-A266-07	0.73588	0.782069	0.700569	0.640388	0.652893	0.775655	0.70404	0.8061	0.664499	0.924301	0.544841	0.752466	0.807689	0.609919	0.987955	0.755641	0.568622	0.853136	0.72316	0.749927	0.686436	0.914546	0.664719	0.602564	0.564393	0.753265	0.812468	0.844775	0.760045
TCGA-BP-5170-01A-01R-1426-07	0.618279	0.822398	0.791998	0.689843	0.707043	0.821939	0.76312	0.901199	0.715935	0.929375	0.687548	0.761009	0.848448	0.797649	0.985114	0.783732	0.680842	0.866901	0.733117	0.739869	0.723069	0.97386	0.617936	0.607249	0.670164	0.801532	0.828764	0.834208	0.868176
TCGA-A3-A6NI-01A-11R-A33J-07	0.548916	0.809675	0.75591	0.653779	0.685937	0.717618	0.734646	0.8873	0.706896	0.946716	0.725233	0.753893	0.831663	0.650412	0.992596	0.775244	0.699631	0.859954	0.743756	0.727452	0.685402	0.954285	0.545253	0.627807	0.560755	0.777261	0.819189	0.819881	0.816219
TCGA-B0-5711-01A-11R-1672-07	0.630254	0.82148	0.801682	0.700408	0.701799	0.874905	0.779852	0.937957	0.714482	0.93806	0.767838	0.812245	0.826533	0.807841	0.993248	0.813343	0.696589	0.868111	0.753425	0.760274	0.764318	0.968259	0.653979	0.695515	0.680855	0.820688	0.842593	0.825875	0.834912
TCGA-CZ-5451-01A-01R-1503-07	0.697789	0.810054	0.796477	0.683438	0.694759	0.859143	0.774151	0.947904	0.674413	0.958249	0.547131	0.808924	0.82462	0.703022	0.994751	0.791356	0.692947	0.859294	0.758813	0.759461	0.744834	0.949451	0.674996	0.673973	0.680078	0.808756	0.829744	0.840912	0.847748
TCGA-BP-4340-01A-01R-1289-07	0.685484	0.750886	0.729631	0.612998	0.657821	0.759342	0.722311	0.87079	0.609553	0.946681	0.50854	0.76725	0.76316	0.655555	0.990212	0.75091	0.656054	0.827036	0.672145	0.716732	0.673449	0.891296	0.575234	0.604067	0.613355	0.756983	0.813352	0.821236	0.799229
TCGA-BP-5180-01A-01R-1426-07	0.745804	0.789768	0.794114	0.678327	0.699345	0.895325	0.776797	0.923443	0.715861	0.944924	0.651466	0.798988	0.819977	0.620471	0.988593	0.789944	0.689644	0.880498	0.766968	0.75636	0.760726	0.969713	0.579313	0.679042	0.680644	0.820711	0.833563	0.83985	0.825783
TCGA-CJ-4639-01A-02R-1325-07	0.610044	0.809292	0.783069	0.677928	0.680286	0.965684	0.781775	0.979195	0.706838	0.945974	0.586804	0.842481	0.790568	0.669298	0.996903	0.781755	0.66398	0.861595	0.764268	0.779132	0.769592	0.964938	0.686977	0.685717	0.641561	0.837519	0.838896	0.84562	0.842674
TCGA-B0-4821-01A-01R-1503-07	0.610554	0.752618	0.759833	0.62005	0.683089	0.899511	0.749693	0.950152	0.625709	0.91908	0.164065	0.819463	0.811066	0.549009	0.989888	0.719073	0.694942	0.860118	0.695318	0.710489	0.735284	0.889959	0.682123	0.661925	0.677823	0.780757	0.814697	0.83112	0.721383
TCGA-CZ-4860-01A-01R-1305-07	0.760707	0.819461	0.773009	0.64495	0.697595	0.834517	0.748828	0.917256	0.717595	0.930584	0.270091	0.771901	0.887118	0.568251	0.992034	0.739202	0.513278	0.871615	0.733269	0.725519	0.743086	0.97219	0.617144	0.669488	0.701534	0.78886	0.838661	0.83415	0.776536
TCGA-B0-4813-01A-01R-1277-07	0.578771	0.777877	0.702196	0.549985	0.661926	0.749142	0.693283	0.805386	0.618844	0.91559	0.519987	0.695301	0.796392	0.620078	0.986433	0.766323	0.613511	0.836465	0.678678	0.673292	0.674571	0.924353	0.510213	0.561078	0.626752	0.739522	0.811315	0.817125	0.707484
TCGA-B8-4619-01A-02R-1325-07	0.637906	0.771066	0.683543	0.678075	0.661006	0.736544	0.675025	0.773264	0.698387	0.8825	0.550488	0.716367	0.737047	0.607954	0.986733	0.729501	0.616817	0.830553	0.612278	0.653541	0.645301	0.880231	0.536037	0.56878	0.647347	0.735869	0.809038	0.770757	0.820693
TCGA-CJ-4892-01A-01R-1305-07	0.573232	0.799559	0.755201	0.653572	0.689586	0.980936	0.776492	0.979617	0.647418	0.961153	0.463956	0.836264	0.766844	0.705801	0.996681	0.773272	0.637887	0.860159	0.735723	0.776492	0.773725	0.963503	0.68989	0.687402	0.688797	0.82839	0.834007	0.852189	0.809039
TCGA-CJ-4916-01A-01R-1426-07	0.606008	0.846533	0.803894	0.711428	0.700637	0.987461	0.813506	0.990335	0.652668	0.978918	0.506981	0.860926	0.821171	0.599249	0.998424	0.798258	0.627993	0.866555	0.789082	0.835244	0.810423	0.983707	0.733228	0.706294	0.717165	0.868251	0.847291	0.841487	0.818266
TCGA-BP-4964-01A-01R-1334-07	0.716446	0.828613	0.787892	0.671591	0.694565	0.886127	0.770436	0.939316	0.712096	0.947537	0.7257	0.798612	0.825445	0.728021	0.994242	0.757942	0.673497	0.86534	0.739902	0.7574	0.762651	0.958865	0.600531	0.634622	0.661597	0.806547	0.839289	0.827023	0.80758
TCGA-B0-5712-01A-11R-1672-07	0.57583	0.79056	0.793454	0.643522	0.67551	0.886559	0.749497	0.882593	0.638186	0.951494	0.356108	0.773427	0.771314	0.631292	0.996315	0.774091	0.601378	0.830409	0.694795	0.73552	0.718438	0.911912	0.676271	0.62667	0.651747	0.768679	0.82134	0.844355	0.740182
TCGA-BP-4965-01A-01R-1334-07	0.583065	0.816228	0.781017	0.681408	0.682954	0.821998	0.748432	0.872186	0.7104	0.934366	0.634407	0.771849	0.809697	0.772934	0.993235	0.795473	0.611105	0.863274	0.733589	0.725212	0.704068	0.968023	0.602625	0.622558	0.614203	0.794156	0.840939	0.839371	0.837342
TCGA-BP-5199-01A-01R-1426-07	0.683049	0.8265	0.789899	0.716083	0.704944	0.986812	0.804776	0.985103	0.681141	0.961907	0.599074	0.869976	0.848996	0.729159	0.996511	0.784491	0.68322	0.883205	0.780201	0.813304	0.794335	0.97728	0.759608	0.729777	0.724593	0.859606	0.846092	0.843417	0.832966
TCGA-BP-4973-01A-01R-1334-07	0.611513	0.817844	0.787095	0.666499	0.680039	0.924392	0.775236	0.915114	0.65725	0.964147	0.586238	0.806295	0.796309	0.680483	0.995481	0.806193	0.612722	0.848624	0.725935	0.757569	0.753043	0.956585	0.665483	0.639564	0.63609	0.813822	0.83696	0.825786	0.822907
TCGA-B2-5635-01A-01R-A277-07	0.560241	0.804482	0.76854	0.655283	0.669974	0.894283	0.759617	0.93554	0.545427	0.965231	0.463828	0.784744	0.780225	0.699712	0.99764	0.784322	0.686176	0.865191	0.739313	0.75865	0.736241	0.947092	0.634537	0.666606	0.669221	0.817083	0.846127	0.850057	0.833352
TCGA-B0-4844-01A-01R-1277-07	0.571808	0.780014	0.791195	0.687213	0.699754	0.901928	0.762562	0.914071	0.675387	0.952003	0.504125	0.806768	0.830928	0.595236	0.994938	0.770743	0.606699	0.886082	0.723137	0.735188	0.757192	0.933433	0.73681	0.676382	0.696815	0.802222	0.829731	0.897399	0.795554
TCGA-G6-A8L7-01A-11R-A37O-07	0.490963	0.75866	0.732893	0.658378	0.675757	0.867574	0.728056	0.94398	0.648008	0.875317	0.521046	0.824803	0.794468	0.34207	0.982558	0.688796	0.64671	0.833146	0.719026	0.721453	0.742251	0.871033	0.676386	0.666068	0.691754	0.773871	0.814385	0.795214	0.699573
TCGA-B0-5088-01A-01R-1334-07	0.610988	0.812759	0.796824	0.711166	0.694747	0.865137	0.778207	0.946701	0.75516	0.951867	0.660461	0.816626	0.881017	0.735337	0.991837	0.772126	0.697266	0.863343	0.76668	0.756716	0.775489	0.984355	0.636702	0.653131	0.639161	0.833264	0.829865	0.826088	0.813548
TCGA-A3-3324-01A-02R-1325-07	0.692353	0.8204	0.802063	0.659879	0.695884	0.926377	0.772912	0.933301	0.711054	0.951739	0.685926	0.790705	0.844366	0.648445	0.995722	0.797262	0.655554	0.85445	0.745109	0.763483	0.752295	0.973389	0.621649	0.685747	0.648678	0.814746	0.839154	0.823403	0.821237
TCGA-BP-4968-01A-01R-1334-07	0.598095	0.826667	0.786381	0.669317	0.693236	0.960535	0.782795	0.959961	0.669119	0.969955	0.592428	0.839013	0.829598	0.675458	0.994035	0.772597	0.686614	0.856659	0.770854	0.779505	0.765685	0.959218	0.67708	0.676295	0.673046	0.826757	0.832709	0.838727	0.797958
TCGA-BP-4352-01A-01R-1289-07	0.631089	0.788299	0.756115	0.543909	0.630505	0.647808	0.677758	0.750274	0.624402	0.866043	0.431927	0.713289	0.768322	0.412877	0.986228	0.693047	0.560885	0.833465	0.645351	0.659806	0.619674	0.838526	0.536651	0.566865	0.58042	0.686864	0.788463	0.811827	0.626894
TCGA-CJ-4872-01A-01R-1305-07	0.5887	0.835222	0.797137	0.682325	0.710251	0.897074	0.776882	0.962163	0.749761	0.920605	0.664798	0.832929	0.820716	0.747865	0.993228	0.784603	0.71842	0.88336	0.755797	0.757461	0.771408	0.963876	0.620256	0.660358	0.692784	0.832201	0.842848	0.861231	0.85399
TCGA-DV-A4VZ-01A-11R-A266-07	0.715872	0.762937	0.657902	0.658357	0.658345	0.680237	0.66726	0.69975	0.549	0.914979	0.454144	0.649988	0.787918	0.581041	0.976464	0.715441	0.548656	0.829878	0.599028	0.605636	0.652351	0.81901	0.531571	0.507118	0.628945	0.694963	0.81966	0.803961	0.775947
TCGA-BP-5006-01A-01R-1334-07	0.620536	0.785817	0.779463	0.662727	0.687471	0.775281	0.73915	0.915064	0.692371	0.948007	0.62898	0.751753	0.810858	0.666495	0.99315	0.804478	0.659901	0.846986	0.744603	0.723241	0.701267	0.942886	0.481715	0.668401	0.577889	0.786653	0.830829	0.829783	0.813828
TCGA-BP-5009-01A-01R-1334-07	0.631039	0.810344	0.811598	0.685651	0.699688	0.950866	0.781388	0.939871	0.595508	0.95376	0.593404	0.794381	0.829455	0.694248	0.990038	0.761269	0.625075	0.857441	0.752083	0.762131	0.787051	0.976946	0.635615	0.62563	0.693255	0.830833	0.837901	0.817262	0.81075
TCGA-B0-4699-01A-01R-1277-07	0.701864	0.911409	0.763384	0.675693	0.687075	0.973389	0.760977	0.964495	0.587464	0.941255	0.471709	0.859012	0.838976	0.547231	0.997163	0.744315	0.647308	0.901301	0.716697	0.815463	0.734388	0.9705	0.731922	0.712333	0.713583	0.8241	0.849465	0.867877	0.740295
TCGA-B0-4834-01A-01R-1305-07	0.585219	0.767996	0.636597	0.607054	0.613987	0.705157	0.622983	0.740674	0.530978	0.861074	0.438635	0.696062	0.720583	0.371301	0.985815	0.665269	0.621795	0.805324	0.605038	0.606183	0.564293	0.859025	0.386277	0.487135	0.57737	0.687099	0.798622	0.766688	0.809393
TCGA-BP-4998-01A-01R-1334-07	0.707088	0.834165	0.789849	0.661044	0.702646	0.910104	0.778945	0.943581	0.688361	0.964459	0.774769	0.803999	0.83192	0.74783	0.995428	0.809964	0.6139	0.87136	0.72897	0.760892	0.739272	0.982547	0.610207	0.655624	0.655041	0.831705	0.853815	0.834969	0.86519
TCGA-B0-5104-01A-01R-1420-07	0.691866	0.769212	0.778805	0.623432	0.689743	0.795583	0.726929	0.857429	0.631819	0.926165	0.569371	0.740057	0.779869	0.562304	0.994562	0.823475	0.534577	0.838937	0.711883	0.688809	0.721172	0.928991	0.4908	0.627953	0.5069	0.77848	0.828248	0.824077	0.813768
TCGA-B0-4945-01A-01R-1420-07	0.584919	0.798229	0.755894	0.661083	0.685849	0.835382	0.733027	0.850601	0.604709	0.923766	0.455305	0.771175	0.799987	0.599889	0.994563	0.761387	0.574393	0.860471	0.711082	0.710766	0.693859	0.937442	0.596489	0.632085	0.650054	0.782362	0.831326	0.836884	0.86574
TCGA-B0-4842-01A-02R-1420-07	0.821861	0.823037	0.781994	0.70911	0.709861	0.913662	0.791078	0.933721	0.767586	0.966201	0.288274	0.845449	0.859606	0.586609	0.996556	0.809467	0.709997	0.876287	0.810946	0.794799	0.813316	0.983805	0.764156	0.718056	0.748898	0.843071	0.839419	0.834188	0.792147
TCGA-AK-3447-01A-01R-1766-07	0.566694	0.785937	0.671425	0.606979	0.614174	0.739885	0.67074	0.85757	0.473112	0.917152	0.0176001	0.755957	0.696439	0.453735	0.983758	0.651377	0.693033	0.814179	0.647029	0.662064	0.598548	0.810893	0.520097	0.508502	0.704902	0.700617	0.791166	0.760007	0.821951
TCGA-B8-5551-01A-01R-1541-07	0.786173	0.908637	0.804336	0.779438	0.734905	0.971777	0.828462	0.968045	0.863529	0.974795	0.685576	0.879132	0.886227	0.597105	0.998672	0.824329	0.68955	0.907909	0.820572	0.853392	0.827499	0.994221	0.831622	0.780302	0.737649	0.891187	0.874586	0.878683	0.83513
TCGA-A3-3349-01A-01R-1188-07	0.563129	0.787379	0.738299	0.686418	0.683624	0.853365	0.730709	0.916159	0.689692	0.922783	0.349337	0.754338	0.790458	0.766442	0.988744	0.801258	0.629519	0.845268	0.743349	0.70603	0.706118	0.970853	0.486653	0.631547	0.600155	0.801357	0.827135	0.838459	0.844395
TCGA-B0-4693-01A-01R-1277-07	0.606032	0.828635	0.798762	0.715846	0.699199	0.9478	0.783211	0.963112	0.685805	0.959578	0.528258	0.815985	0.80802	0.678622	0.995213	0.823783	0.683374	0.862397	0.742871	0.786604	0.75408	0.9557	0.645064	0.67981	0.675104	0.838119	0.844522	0.826687	0.828165
TCGA-A3-3346-01A-01R-1766-07	0.680312	0.838096	0.776332	0.603142	0.708513	0.89729	0.771397	0.923861	0.674336	0.951725	0.543081	0.82039	0.877925	0.605963	0.996335	0.800099	0.615457	0.894501	0.773152	0.765887	0.769507	0.957017	0.691818	0.67147	0.619442	0.806166	0.838854	0.905049	0.78741
TCGA-B0-5120-01A-01R-1420-07	0.602753	0.814276	0.783286	0.658524	0.702533	0.783182	0.74612	0.871047	0.742268	0.947141	0.604824	0.769156	0.828639	0.75865	0.988062	0.778693	0.688282	0.864115	0.722551	0.737747	0.718321	0.971089	0.627978	0.603971	0.578802	0.80193	0.830398	0.8184	0.861114
TCGA-BP-5177-01A-01R-1426-07	0.671046	0.789072	0.77958	0.68638	0.686044	0.865569	0.754757	0.929462	0.688607	0.94366	0.646078	0.811402	0.759304	0.731784	0.990683	0.766635	0.653146	0.855214	0.712789	0.71692	0.724316	0.942788	0.64168	0.636396	0.659112	0.795278	0.82905	0.815723	0.844526
TCGA-B8-4154-01A-01R-1188-07	0.605459	0.824275	0.792211	0.675933	0.693842	0.908355	0.783203	0.966517	0.724696	0.950513	0.621501	0.843431	0.783051	0.663273	0.993058	0.79064	0.790858	0.865048	0.772476	0.776165	0.749243	0.949883	0.635759	0.674818	0.689379	0.812721	0.829133	0.847069	0.818256
TCGA-B8-4153-01B-11R-1672-07	0.624953	0.798952	0.78665	0.651929	0.67748	0.841494	0.745265	0.916436	0.509593	0.940044	0.521268	0.774601	0.803003	0.682692	0.989567	0.783821	0.634828	0.849043	0.751795	0.697472	0.70556	0.925729	0.528266	0.678672	0.644744	0.776186	0.821612	0.849495	0.823364
TCGA-CJ-6030-01A-11R-1672-07	0.651347	0.83358	0.794508	0.72734	0.72396	0.934278	0.800328	0.958381	0.753926	0.949246	0.653749	0.84968	0.886224	0.765831	0.992383	0.836891	0.726021	0.884867	0.79018	0.800217	0.785572	0.986714	0.756252	0.742844	0.73404	0.854839	0.858542	0.828425	0.841875
TCGA-CW-5584-01A-01R-1541-07	0.716399	0.799371	0.790455	0.677266	0.699187	0.783319	0.760476	0.845391	0.692828	0.936818	0.583136	0.754733	0.814612	0.722698	0.994165	0.808998	0.665327	0.863941	0.760486	0.722938	0.706032	0.970342	0.570678	0.668411	0.65008	0.793191	0.840415	0.824383	0.836802
TCGA-B0-5696-01A-11R-1541-07	0.595182	0.863166	0.782443	0.628669	0.687513	0.854504	0.758926	0.894726	0.672992	0.94478	0.582867	0.774767	0.798635	0.706232	0.988408	0.774171	0.658873	0.848215	0.732836	0.734052	0.706468	0.933944	0.636324	0.635187	0.681848	0.780867	0.834407	0.823076	0.839762
TCGA-BP-4765-01A-01R-1289-07	0.629793	0.777153	0.717998	0.66826	0.678681	0.693503	0.712766	0.89138	0.677546	0.937828	0.527597	0.743377	0.750377	0.731806	0.986627	0.771156	0.653036	0.843198	0.70066	0.705062	0.646737	0.90977	0.479602	0.564083	0.545095	0.772497	0.814193	0.82708	0.842352
TCGA-BP-4782-01A-02R-1420-07	0.576561	0.827911	0.777568	0.688831	0.706689	0.906252	0.780996	0.961621	0.713195	0.955764	0.563922	0.82451	0.853615	0.693314	0.995058	0.785026	0.755513	0.872942	0.776814	0.778955	0.75542	0.963208	0.694511	0.68877	0.617492	0.830701	0.849475	0.814106	0.846176
TCGA-B8-5165-01A-01R-1420-07	0.603054	0.817079	0.779332	0.701742	0.695633	0.824218	0.755812	0.899276	0.714536	0.933654	0.573571	0.764751	0.832495	0.787968	0.987351	0.798645	0.652591	0.869825	0.745768	0.734834	0.721236	0.961734	0.622124	0.629928	0.639935	0.804591	0.835477	0.850726	0.889065
TCGA-B2-3923-01A-02R-A277-07	0.670911	0.747024	0.55886	0.577085	0.598652	0.527627	0.590058	0.801191	0.516026	0.878871	0.385038	0.667621	0.725889	0.611925	0.963947	0.69225	0.580725	0.790556	0.641216	0.61663	0.516608	0.81616	0.423865	0.439447	0.608989	0.667594	0.793357	0.748879	0.782648
TCGA-AK-3425-01A-02R-1277-07	0.63295	0.845551	0.809943	0.688293	0.718386	0.950925	0.801925	0.959102	0.713637	0.95428	0.686817	0.846782	0.874563	0.690292	0.994346	0.803448	0.702664	0.883613	0.810675	0.787106	0.783629	0.978302	0.70028	0.690972	0.698859	0.840255	0.85166	0.830791	0.851256
TCGA-AS-3778-01A-01R-A32Z-07	0.543586	0.796704	0.747899	0.630318	0.673416	0.826321	0.745007	0.896288	0.72337	0.932029	0.596465	0.748845	0.803741	0.644304	0.991303	0.787755	0.627475	0.84971	0.733084	0.718721	0.706029	0.957332	0.555813	0.592397	0.555711	0.783343	0.81809	0.81546	0.824784
TCGA-CW-6087-01A-11R-1672-07	0.63104	0.932271	0.824339	0.750761	0.733238	0.994477	0.827615	0.985067	0.80824	0.946621	0.578697	0.890116	0.841077	0.702111	1	0.832785	0.637612	0.903154	0.816824	0.880281	0.816281	0.994811	0.87117	0.832434	0.786292	0.902025	0.875939	0.864802	0.80231
TCGA-B0-5108-01A-01R-1420-07	0.781254	0.881388	0.786763	0.697845	0.739646	0.877735	0.79658	0.963042	0.778676	0.957627	0.568317	0.836328	0.880529	0.66433	0.993937	0.82053	0.712293	0.884474	0.761372	0.792047	0.797456	0.983844	0.695901	0.754959	0.688349	0.85102	0.865746	0.820572	0.832916
TCGA-B0-5699-01A-11R-1541-07	0.744133	0.80335	0.784023	0.658336	0.684987	0.808358	0.761443	0.924629	0.687551	0.950704	0.631167	0.790328	0.815591	0.62547	0.99582	0.812277	0.698694	0.861768	0.785483	0.730186	0.736516	0.951102	0.592411	0.64648	0.670133	0.800337	0.831514	0.856499	0.790268
TCGA-B0-4814-01A-01R-1277-07	0.561873	0.7911	0.751935	0.68723	0.679363	0.819836	0.735251	0.87133	0.648628	0.935717	0.512564	0.763145	0.790347	0.617195	0.992393	0.776413	0.566792	0.853342	0.677215	0.697805	0.709774	0.925591	0.585411	0.60711	0.580511	0.782234	0.816585	0.829769	0.803457
TCGA-AK-3465-01A-02R-1325-07	0.547433	0.737635	0.605464	0.614048	0.634601	0.621591	0.6443	0.773336	0.60628	0.850898	0.613706	0.699284	0.753016	0.646199	0.975197	0.712536	0.593975	0.795779	0.615369	0.628889	0.599969	0.840491	0.449019	0.505439	0.659261	0.708247	0.810605	0.738151	0.813453
TCGA-CJ-4918-01A-01R-1426-07	0.708532	0.815828	0.779137	0.69084	0.701264	0.890451	0.758038	0.934088	0.715301	0.935579	0.578762	0.810817	0.85996	0.732633	0.99027	0.794004	0.612858	0.877771	0.73123	0.741033	0.754356	0.975275	0.686925	0.652261	0.656638	0.82956	0.842989	0.825093	0.86924
TCGA-BP-4344-01A-01R-1289-07	0.608502	0.807002	0.739808	0.665664	0.697916	0.747982	0.72668	0.861338	0.692065	0.935082	0.621136	0.753041	0.779325	0.671254	0.992571	0.795494	0.663736	0.865805	0.756179	0.712952	0.6869	0.957568	0.511517	0.586921	0.575023	0.79318	0.824808	0.836619	0.843454
TCGA-B4-5835-01A-11R-1672-07	0.637692	0.79291	0.785313	0.672586	0.691408	0.831412	0.752169	0.86961	0.714671	0.94182	0.611526	0.76961	0.853133	0.568593	0.993604	0.779961	0.645404	0.877544	0.751611	0.762486	0.728293	0.947623	0.646549	0.643956	0.648894	0.790797	0.826855	0.83831	0.808947
TCGA-A3-3372-01A-02R-1325-07	0.625185	0.810163	0.743349	0.651231	0.682817	0.864705	0.752041	0.915324	0.690642	0.958676	0.538724	0.800758	0.794506	0.700042	0.994633	0.801465	0.64055	0.864528	0.735669	0.748849	0.729206	0.970323	0.591101	0.651801	0.604428	0.803873	0.840553	0.83912	0.828924
TCGA-BP-4981-01A-01R-1334-07	0.587821	0.775745	0.798663	0.628326	0.681195	0.862327	0.764735	0.949137	0.601923	0.961615	0.491098	0.783902	0.788592	0.523292	0.993865	0.772698	0.669024	0.852416	0.730402	0.723961	0.760713	0.955759	0.644354	0.602214	0.62734	0.795103	0.815079	0.828798	0.790415
TCGA-BP-4170-01A-02R-1289-07	0.626883	0.834492	0.793263	0.691697	0.715846	0.921759	0.787418	0.940743	0.706999	0.944947	0.5922	0.830626	0.825202	0.756481	0.99578	0.832168	0.638081	0.874943	0.770174	0.774453	0.774511	0.973546	0.722568	0.671853	0.715131	0.831602	0.847958	0.843753	0.861644
TCGA-CJ-4643-01A-02R-1325-07	0.680193	0.816277	0.745078	0.679307	0.692816	0.837838	0.751324	0.929155	0.683172	0.950208	0.616988	0.801554	0.802205	0.662385	0.994465	0.809428	0.627893	0.867263	0.735782	0.745107	0.742009	0.963719	0.629809	0.627434	0.621581	0.815278	0.839695	0.830382	0.831528
TCGA-BP-4977-01A-01R-1334-07	0.585373	0.793729	0.765273	0.632586	0.678678	0.815728	0.749376	0.875214	0.664176	0.938797	0.625436	0.747863	0.828138	0.642513	0.99265	0.791859	0.63987	0.844453	0.725836	0.731753	0.725489	0.963326	0.56566	0.675815	0.603671	0.795621	0.82977	0.826614	0.827875
TCGA-B2-5633-01A-01R-1541-07	0.606143	0.800835	0.771196	0.698467	0.697973	0.869991	0.766326	0.924703	0.702483	0.943348	0.726039	0.784979	0.858003	0.703775	0.991071	0.798175	0.662244	0.87293	0.76667	0.747372	0.749114	0.977693	0.622707	0.665602	0.672293	0.821687	0.857079	0.827476	0.868959
TCGA-A3-3311-01A-02R-1325-07	0.583782	0.817259	0.802696	0.698465	0.702405	0.896131	0.76662	0.90562	0.699644	0.940655	0.531551	0.797259	0.830614	0.696196	0.996054	0.813822	0.700738	0.873248	0.764424	0.767678	0.746658	0.972229	0.688036	0.693834	0.638662	0.821961	0.846428	0.833721	0.822712
TCGA-BP-5173-01A-01R-1426-07	0.739148	0.834153	0.784965	0.719815	0.694943	0.966942	0.785257	0.961573	0.75572	0.960808	0.632555	0.827236	0.833343	0.772526	0.996204	0.768046	0.668642	0.86289	0.762752	0.789697	0.769979	0.965527	0.701082	0.68492	0.690877	0.835411	0.835641	0.809613	0.821253
TCGA-BP-5007-01A-01R-1334-07	0.56202	0.807248	0.76337	0.670779	0.669368	0.915548	0.766428	0.945003	0.616987	0.957593	0.528321	0.794936	0.801	0.597111	0.994576	0.770999	0.690476	0.857418	0.723459	0.752422	0.744463	0.940371	0.622157	0.651039	0.621826	0.806742	0.834187	0.841631	0.830462
TCGA-A3-3362-01A-02R-1325-07	0.565233	0.791012	0.762121	0.632363	0.681587	0.843892	0.742346	0.873084	0.692513	0.905451	0.475685	0.753087	0.790783	0.709019	0.991831	0.800985	0.60013	0.86532	0.721822	0.708934	0.703981	0.951082	0.563846	0.585147	0.611223	0.781823	0.821115	0.839084	0.828398
TCGA-BP-4781-01A-01R-1305-07	0.628863	0.809994	0.798736	0.650053	0.69143	0.790198	0.747896	0.838749	0.668474	0.938662	0.555343	0.731601	0.869987	0.67136	0.989459	0.787305	0.611309	0.872502	0.745226	0.71389	0.704852	0.963916	0.610164	0.640046	0.62151	0.783749	0.842608	0.8325	0.856649
TCGA-A3-3365-01A-01R-0864-07	0.585212	0.812904	0.743689	0.716066	0.699202	0.828739	0.749882	0.933543	0.710306	0.940374	0.60966	0.801397	0.807454	0.72983	0.992299	0.791979	0.72772	0.864311	0.750123	0.734185	0.716696	0.944478	0.571764	0.651038	0.664121	0.812727	0.829331	0.840142	0.853483
TCGA-DV-A4W0-01A-11R-A266-07	0.710493	0.806948	0.724469	0.643521	0.674605	0.795603	0.725602	0.822034	0.666699	0.934721	0.409996	0.752703	0.832149	0.638903	0.993463	0.758876	0.653921	0.861329	0.721286	0.688631	0.678045	0.911067	0.602133	0.573287	0.66734	0.762867	0.819383	0.866446	0.81297
TCGA-B0-5092-01A-01R-1420-07	0.697708	0.838248	0.802057	0.685418	0.69759	0.991195	0.816801	0.984441	0.684464	0.981292	0.656514	0.877495	0.805963	0.661154	0.999117	0.785012	0.61948	0.86353	0.783314	0.839981	0.834605	0.978518	0.788598	0.740302	0.735561	0.86976	0.848324	0.863523	0.788308
TCGA-CJ-5683-01A-11R-1541-07	0.738894	0.781721	0.759117	0.629317	0.690954	0.821408	0.747353	0.897245	0.685388	0.953246	0.640564	0.762426	0.812793	0.651316	0.989898	0.758465	0.595554	0.856639	0.691083	0.701007	0.708481	0.949942	0.575381	0.621501	0.634571	0.775151	0.827679	0.819956	0.837377
TCGA-BP-4331-01A-01R-1289-07	0.704192	0.808741	0.789062	0.674339	0.695636	0.847016	0.763983	0.900344	0.685956	0.963585	0.661144	0.774697	0.842706	0.676278	0.996087	0.808613	0.573747	0.862225	0.77067	0.743534	0.747828	0.973978	0.586305	0.685917	0.615101	0.817593	0.838787	0.860886	0.811998
TCGA-B2-A4SR-01A-11R-A266-07	0.577172	0.821349	0.77039	0.689402	0.685209	0.857138	0.763686	0.928824	0.729161	0.948216	0.726436	0.820952	0.834979	0.715255	0.991928	0.779649	0.729437	0.859721	0.749796	0.741492	0.741986	0.959022	0.711481	0.631064	0.632002	0.816436	0.844319	0.825937	0.881747
TCGA-BP-4976-01A-01R-1334-07	0.577345	0.777974	0.775354	0.679335	0.672152	0.729881	0.740957	0.857319	0.700258	0.934787	0.599967	0.727422	0.799648	0.724676	0.987934	0.789199	0.631094	0.843632	0.731107	0.716578	0.701476	0.950767	0.568837	0.623378	0.601696	0.775786	0.822129	0.818659	0.839325
TCGA-B2-4099-01A-02R-1188-07	0.756834	0.832004	0.813051	0.660043	0.712148	0.819816	0.78483	0.949039	0.712445	0.960426	0.625583	0.813717	0.828347	0.748951	0.996328	0.811523	0.768192	0.86026	0.797565	0.757948	0.743304	0.96592	0.595083	0.69637	0.640763	0.819415	0.833337	0.833676	0.813561
TCGA-B2-3923-01B-10R-A277-07	0.485627	0.761552	0.561421	0.540018	0.560308	0.510194	0.583421	0.717513	0.348837	0.805684	0.230481	0.629225	0.678469	0.55979	0.916083	0.655976	0.555864	0.740757	0.477124	0.575936	0.545173	0.774082	0.3877	0.462127	0.639229	0.633732	0.781628	0.672624	0.739724
TCGA-G6-A5PC-01A-11R-A33J-07	0.687119	0.782795	0.763696	0.632936	0.672938	0.943908	0.771567	0.930396	0.674048	0.929484	0.505499	0.800663	0.809203	0.618947	0.993797	0.723238	0.659564	0.845258	0.767848	0.759166	0.749031	0.929149	0.63741	0.652206	0.654127	0.797421	0.801632	0.861055	0.747071
TCGA-B0-5812-01A-11R-1672-07	0.596393	0.81908	0.778385	0.686317	0.707833	0.85417	0.773512	0.940996	0.749477	0.941121	0.659247	0.816239	0.79617	0.736893	0.990948	0.801568	0.719709	0.878279	0.73987	0.746579	0.749834	0.954108	0.622097	0.65727	0.6775	0.818147	0.842561	0.843677	0.877314
TCGA-BP-4341-01A-01R-1289-07	0.685773	0.781175	0.67617	0.607337	0.653782	0.685759	0.685945	0.897099	0.563017	0.893443	0.485206	0.709978	0.776499	0.794053	0.988089	0.763406	0.672626	0.814427	0.696508	0.667598	0.627542	0.914566	0.444231	0.56475	0.538252	0.745056	0.794035	0.800975	0.797671
TCGA-BP-4795-01A-02R-1420-07	0.587835	0.801613	0.727667	0.748435	0.704706	0.827343	0.74977	0.879109	0.819537	0.929272	0.740178	0.75893	0.835138	0.819409	0.984861	0.814018	0.618396	0.873867	0.811486	0.712535	0.740053	0.968259	0.564008	0.661192	0.669463	0.828509	0.846623	0.845202	0.879147
TCGA-AK-3451-01A-02R-1188-07	0.56176	0.80095	0.783903	0.663854	0.696206	0.940705	0.765798	0.931297	0.784795	0.952444	0.832588	0.77802	0.862204	0.776872	0.995102	0.77635	0.756486	0.86037	0.755324	0.752104	0.744972	0.922348	0.716106	0.65477	0.701597	0.814346	0.826964	0.823521	0.816072
TCGA-CZ-5987-01A-11R-1672-07	0.609891	0.789788	0.790716	0.673749	0.696622	0.876222	0.784504	0.924537	0.683809	0.956813	0.602677	0.819283	0.824601	0.577589	0.992416	0.808421	0.674429	0.870184	0.750453	0.778301	0.773109	0.967257	0.66869	0.743115	0.690591	0.822014	0.848565	0.85316	0.809669
TCGA-MM-A564-01A-11R-A266-07	0.573421	0.761241	0.754363	0.661832	0.66143	0.746155	0.726767	0.934486	0.597835	0.904464	0.554744	0.763172	0.776312	0.665564	0.983166	0.773237	0.700903	0.828254	0.696248	0.668165	0.690795	0.861167	0.565824	0.59997	0.600951	0.7613	0.810622	0.835805	0.818917
TCGA-BP-4787-01A-01R-1305-07	0.621166	0.825139	0.812156	0.654946	0.707009	0.876123	0.774529	0.902505	0.744175	0.933236	0.554118	0.782051	0.874514	0.714159	0.990576	0.828763	0.698849	0.889901	0.759158	0.762973	0.750687	0.977889	0.674695	0.659299	0.662158	0.814941	0.848282	0.84126	0.836532
TCGA-DV-5566-01A-01R-1541-07	0.726975	0.791966	0.787672	0.678239	0.697789	0.821958	0.75596	0.863951	0.679908	0.935695	0.565369	0.779268	0.798176	0.687479	0.995826	0.787117	0.583443	0.854107	0.73861	0.717284	0.716505	0.941137	0.581214	0.648121	0.640607	0.775856	0.835519	0.818713	0.815232
TCGA-BP-5190-01A-01R-1426-07	0.540729	0.76999	0.782889	0.669316	0.674134	0.83377	0.741709	0.916013	0.668057	0.937318	0.402714	0.768908	0.815189	0.687095	0.992006	0.765591	0.71438	0.845868	0.710053	0.721488	0.72906	0.932843	0.557128	0.655824	0.617635	0.784878	0.818298	0.813218	0.806342
TCGA-BP-4162-01A-02R-1325-07	0.632378	0.855419	0.802941	0.702804	0.702184	0.97272	0.794391	0.974078	0.683137	0.969543	0.562816	0.854965	0.83656	0.655402	0.997757	0.8238	0.710669	0.872656	0.766426	0.811816	0.771557	0.974489	0.735841	0.690809	0.682079	0.844169	0.848097	0.834153	0.833575
TCGA-BP-4343-01A-02R-1289-07	0.642421	0.864259	0.814093	0.75287	0.714914	0.902321	0.796005	0.916675	0.74528	0.953226	0.656617	0.839174	0.871742	0.701144	0.992188	0.795449	0.807707	0.889666	0.802222	0.79364	0.772621	0.97669	0.722276	0.679911	0.757363	0.849501	0.860804	0.825875	0.853545
TCGA-AK-3458-01A-01R-1503-07	0.514509	0.728633	0.743288	0.649112	0.671959	0.90639	0.731869	0.956245	0.627464	0.95841	0.747764	0.801985	0.720761	0.701685	0.995121	0.752036	0.792659	0.836346	0.732893	0.711065	0.703844	0.90356	0.679093	0.603698	0.630928	0.787928	0.810392	0.827571	0.799076
TCGA-CZ-5457-01A-01R-1503-07	0.696113	0.832381	0.781447	0.683771	0.687616	0.89448	0.765401	0.925125	0.676406	0.96015	0.572115	0.800284	0.842039	0.8059	0.994625	0.797691	0.710616	0.869702	0.74197	0.761663	0.716448	0.958688	0.63679	0.66374	0.65428	0.804011	0.832574	0.834894	0.862851
TCGA-A3-A8OX-01A-11R-A37O-07	0.716449	0.834983	0.788329	0.724713	0.708638	0.870011	0.773488	0.92394	0.710064	0.951915	0.592937	0.831338	0.830663	0.621059	0.997333	0.797904	0.647725	0.871637	0.774288	0.76968	0.767933	0.961852	0.7042	0.671239	0.639807	0.834265	0.841453	0.825603	0.838247
TCGA-B0-4817-01A-01R-1277-07	0.539935	0.738113	0.774952	0.650363	0.688649	0.806393	0.74786	0.878184	0.591487	0.947909	0.438067	0.796623	0.838072	0.448334	0.9933	0.897781	0.710353	0.86421	0.700918	0.695157	0.746317	0.863309	0.656622	0.606924	0.654397	0.790217	0.818578	0.85423	0.740178
TCGA-CJ-4888-01A-01R-1305-07	0.739114	0.892726	0.811394	0.76737	0.726998	0.985928	0.817991	0.981575	0.725881	0.957008	0.535251	0.872998	0.867809	0.664956	0.99862	0.829765	0.74285	0.907171	0.802432	0.861773	0.81247	0.98296	0.823449	0.763522	0.710184	0.88783	0.863601	0.883013	0.808218
TCGA-BP-5191-01A-01R-1426-07	0.790488	0.829166	0.803233	0.742059	0.714442	0.923351	0.812991	0.962765	0.788034	0.970543	0.58534	0.870045	0.877371	0.666365	0.991746	0.78932	0.805156	0.891121	0.804899	0.825629	0.843973	0.984021	0.76221	0.762745	0.723389	0.875571	0.845345	0.845654	0.795128
TCGA-B2-5635-01A-01R-1541-07	0.685996	0.833499	0.788017	0.679998	0.699178	0.952084	0.785285	0.94951	0.669797	0.975353	0.545233	0.824902	0.810148	0.685113	0.997771	0.815776	0.665723	0.877628	0.7776	0.777468	0.771321	0.978341	0.688688	0.690221	0.680552	0.837482	0.847069	0.861694	0.842166
TCGA-T7-A92I-01A-11R-A37O-07	0.609593	0.848483	0.759345	0.615607	0.653229	0.821546	0.710782	0.835523	0.602152	0.912561	0.60536	0.676683	0.821266	0.566109	0.988408	0.772879	0.518219	0.824741	0.704222	0.74062	0.670993	0.896524	0.442538	0.609562	0.549482	0.764298	0.812904	0.819605	0.718222
TCGA-CJ-4901-01A-01R-1426-07	0.801139	0.876682	0.825955	0.745141	0.732413	0.974961	0.825373	0.97829	0.754054	0.962669	0.613886	0.894508	0.843975	0.658193	0.997097	0.819775	0.774374	0.892366	0.786874	0.841927	0.83148	0.986045	0.755478	0.785033	0.732859	0.886977	0.86732	0.849559	0.841766
TCGA-G6-A8L8-01A-21R-A37O-07	0.608189	0.771845	0.738561	0.647479	0.662854	0.70785	0.727224	0.898746	0.679727	0.929867	0.688047	0.742359	0.736759	0.682152	0.989739	0.731138	0.64836	0.821399	0.702158	0.67195	0.710382	0.875062	0.499557	0.608552	0.642698	0.755948	0.806648	0.81469	0.788784
TCGA-BP-4173-01A-02R-1289-07	0.669098	0.89073	0.816999	0.749519	0.725654	0.992747	0.836707	0.989114	0.712403	0.956004	0.555838	0.882697	0.842854	0.686074	0.999261	0.856729	0.687923	0.897296	0.845932	0.85446	0.823039	0.990978	0.798158	0.755605	0.745716	0.89499	0.869374	0.863464	0.82745
TCGA-AK-3434-01A-02R-1277-07	0.691185	0.827968	0.766347	0.629054	0.693787	0.886009	0.766756	0.962797	0.595548	0.932414	0.566223	0.811265	0.798382	0.6474	0.993209	0.73552	0.740016	0.862291	0.757914	0.737792	0.747015	0.955248	0.677488	0.654174	0.720123	0.810696	0.834444	0.83788	0.822517
TCGA-BP-4329-01A-02R-1289-07	0.614633	0.816636	0.769864	0.673671	0.703844	0.839666	0.75916	0.91679	0.723112	0.94513	0.674722	0.785416	0.834809	0.769778	0.989929	0.792803	0.666493	0.877177	0.768337	0.733945	0.737095	0.947996	0.611028	0.642783	0.664849	0.8048	0.841793	0.826246	0.840091
TCGA-CZ-5462-01A-01R-1503-07	0.649977	0.830356	0.808315	0.702314	0.716212	0.784558	0.769944	0.893577	0.691694	0.957884	0.60202	0.802568	0.845333	0.603903	0.995767	0.837141	0.693298	0.888337	0.768719	0.746461	0.76596	0.94666	0.604995	0.703625	0.683595	0.816701	0.849576	0.883938	0.843963
TCGA-B0-4706-01A-01R-1503-07	0.583497	0.769626	0.767447	0.646228	0.675799	0.911087	0.749531	0.973471	0.497745	0.909238	0.410599	0.820834	0.751054	0.617664	0.993839	0.756308	0.721786	0.852206	0.721708	0.716293	0.72415	0.95574	0.579859	0.65032	0.633432	0.791205	0.81949	0.859888	0.812596
TCGA-CJ-4920-01A-01R-1426-07	0.596726	0.795368	0.802617	0.625352	0.698191	0.77306	0.760478	0.888607	0.676152	0.933484	0.654426	0.754516	0.814083	0.693148	0.99118	0.776699	0.579328	0.865052	0.730135	0.711597	0.754264	0.966235	0.560202	0.607342	0.631021	0.79188	0.833229	0.830242	0.843415
TCGA-B8-A54I-01A-21R-A33J-07	0.7128	0.843486	0.79949	0.758431	0.712481	0.852677	0.800263	0.917117	0.820997	0.967851	0.765136	0.826001	0.855662	0.685655	0.989044	0.775025	0.75004	0.871237	0.760223	0.780288	0.814783	0.97673	0.735296	0.717308	0.695887	0.852918	0.85734	0.831302	0.813416
TCGA-CJ-4893-01A-01R-1305-07	0.594007	0.857788	0.783359	0.695804	0.69636	0.96366	0.790329	0.968636	0.703514	0.965845	0.600007	0.83405	0.801125	0.768768	0.995846	0.796559	0.654279	0.865706	0.74499	0.799406	0.769433	0.972072	0.608616	0.696708	0.68629	0.833699	0.851427	0.815037	0.845227
TCGA-BP-4960-01A-01R-1334-07	0.697994	0.781683	0.794928	0.677809	0.706093	0.874748	0.767224	0.930751	0.672566	0.955669	0.535558	0.817217	0.823839	0.756024	0.984745	0.80338	0.602211	0.8707	0.746761	0.740857	0.762865	0.97215	0.649682	0.651078	0.626582	0.815072	0.834585	0.809443	0.842299
TCGA-B2-3924-01A-02R-1325-07	0.739103	0.887262	0.801068	0.729057	0.714168	0.985318	0.817747	0.983654	0.749988	0.973419	0.555607	0.871025	0.826573	0.77369	0.999274	0.810052	0.686235	0.876644	0.799646	0.839657	0.794976	0.987107	0.760119	0.71158	0.734328	0.867886	0.85816	0.866003	0.830227
TCGA-B2-3923-01A-02R-1325-07	0.600325	0.781149	0.631228	0.59541	0.629256	0.688825	0.641148	0.809875	0.63199	0.899318	0.466734	0.729351	0.774907	0.679038	0.967449	0.743006	0.612067	0.814546	0.678317	0.651396	0.607436	0.870699	0.48841	0.550577	0.651706	0.715051	0.81397	0.758405	0.813719
TCGA-BP-5185-01A-01R-1426-07	0.546581	0.77511	0.769794	0.629829	0.67157	0.89672	0.757619	0.930351	0.688426	0.936979	0.328044	0.762159	0.753935	0.75839	0.986728	0.709411	0.61522	0.84815	0.762559	0.728023	0.720875	0.932234	0.618013	0.638078	0.699214	0.779484	0.8098	0.843965	0.779745
TCGA-A3-3357-01A-02R-1420-07	0.599135	0.830401	0.783947	0.67711	0.68313	0.935988	0.773475	0.920696	0.666984	0.964186	0.455978	0.771351	0.859436	0.660466	0.996694	0.805215	0.636791	0.855485	0.736112	0.775074	0.743587	0.976238	0.656253	0.655803	0.645098	0.815961	0.838895	0.828872	0.797574
TCGA-A3-A8CQ-01A-11R-A37O-07	0.58266	0.780952	0.746095	0.656147	0.675638	0.765101	0.731678	0.857247	0.631558	0.908553	0.61233	0.753557	0.773303	0.749782	0.992207	0.772281	0.585234	0.845752	0.729164	0.712951	0.703346	0.947348	0.494565	0.611576	0.600276	0.777787	0.826856	0.821991	0.822557
TCGA-BP-5176-01A-01R-1426-07	0.580825	0.805014	0.789628	0.684272	0.697723	0.827284	0.756322	0.947767	0.697604	0.951297	0.570747	0.791484	0.809701	0.751626	0.992026	0.747283	0.708299	0.865276	0.752841	0.720698	0.734906	0.951298	0.548257	0.668657	0.602122	0.797951	0.829242	0.834156	0.836186
TCGA-BP-4160-01A-02R-1289-07	0.606338	0.854726	0.809795	0.713397	0.717683	0.988718	0.798345	0.974951	0.738173	0.969722	0.57602	0.857401	0.825158	0.748216	0.998058	0.78963	0.699187	0.883644	0.762361	0.803226	0.782556	0.978086	0.739354	0.726367	0.73387	0.853872	0.861396	0.826058	0.840418
TCGA-B2-3924-01A-02R-A277-07	0.595938	0.853388	0.767176	0.656695	0.675363	0.970873	0.777084	0.983193	0.651388	0.968271	0.446063	0.841917	0.783156	0.723926	0.998842	0.760168	0.621705	0.858843	0.761425	0.815364	0.742863	0.972367	0.68802	0.704671	0.704273	0.845141	0.846428	0.858845	0.820384
TCGA-B0-4822-01A-01R-1277-07	0.608506	0.784916	0.79111	0.644199	0.699393	0.915804	0.769589	0.929327	0.701034	0.922086	0.485036	0.795086	0.83925	0.655051	0.986408	0.74911	0.693395	0.873725	0.754576	0.752983	0.773585	0.961203	0.585257	0.670938	0.702461	0.813547	0.824605	0.836603	0.850365
TCGA-A3-3328-01A-01R-0864-07	0.635296	0.739832	0.619476	0.59674	0.608474	0.525583	0.626414	0.780466	0.457289	0.855969	0.342851	0.682615	0.723703	0.407367	0.988426	0.753393	0.763362	0.771675	0.609008	0.614518	0.541258	0.778327	0.446494	0.437991	0.55257	0.654148	0.785917	0.744667	0.735258
TCGA-CW-5583-01A-02R-1541-07	0.546398	0.77892	0.750451	0.666793	0.676845	0.808496	0.734429	0.910052	0.71517	0.92406	0.518105	0.763748	0.783822	0.757828	0.989707	0.7915	0.636632	0.850932	0.715303	0.713128	0.689549	0.934632	0.496693	0.610177	0.626345	0.773642	0.825861	0.813449	0.857361
TCGA-B8-4148-01A-02R-1325-07	0.598474	0.843372	0.783404	0.709664	0.692242	0.984178	0.795361	0.980277	0.613686	0.984879	0.562513	0.864209	0.773755	0.730083	0.999679	0.788398	0.709741	0.869944	0.771616	0.816585	0.781125	0.979344	0.732748	0.711857	0.70229	0.857044	0.855078	0.867818	0.799034
TCGA-BP-4959-01A-01R-1334-07	0.697723	0.827322	0.804663	0.702689	0.695587	0.865117	0.768244	0.88772	0.821976	0.943353	0.715664	0.752077	0.905864	0.745128	0.989145	0.79342	0.688132	0.860545	0.767579	0.744186	0.744691	0.978754	0.621746	0.664917	0.620958	0.825162	0.840327	0.839902	0.820852
TCGA-B0-5097-01A-01R-1420-07	0.623653	0.85005	0.786806	0.674623	0.727527	0.867771	0.781774	0.887711	0.835483	0.936112	0.670119	0.789034	0.884412	0.738143	0.992697	0.82276	0.578228	0.88072	0.747882	0.75848	0.783054	0.981682	0.685717	0.722623	0.704833	0.830829	0.8569	0.82135	0.839853
TCGA-CW-6090-01A-11R-1672-07	0.62153	0.861182	0.791862	0.728261	0.708119	0.908689	0.77915	0.925008	0.730064	0.945848	0.563306	0.806011	0.894973	0.744955	0.987084	0.806976	0.688903	0.870353	0.790572	0.775391	0.755578	0.977516	0.666751	0.672322	0.700148	0.83011	0.845259	0.806567	0.862712
TCGA-B2-4102-01A-02R-1325-07	0.616354	0.815546	0.775293	0.68842	0.69349	0.795996	0.765181	0.920834	0.660325	0.961766	0.628662	0.796535	0.803374	0.729557	0.995644	0.821746	0.693365	0.876797	0.779736	0.762779	0.750082	0.979579	0.574463	0.6875	0.641524	0.829662	0.84265	0.859187	0.819967
TCGA-BP-4799-01A-01R-1305-07	0.609323	0.837379	0.794016	0.712224	0.712913	0.945264	0.772164	0.961317	0.62645	0.940334	0.285865	0.849246	0.847969	0.661736	0.994561	0.789871	0.74958	0.885781	0.740369	0.772175	0.753986	0.930485	0.73299	0.720734	0.747364	0.8327	0.851608	0.848234	0.833198
TCGA-BP-4177-01A-02R-1420-07	0.580544	0.775087	0.697569	0.687442	0.682713	0.753505	0.703642	0.812567	0.706014	0.918145	0.60076	0.723279	0.789885	0.722702	0.98316	0.75833	0.611531	0.858264	0.711444	0.638793	0.661731	0.916118	0.558715	0.563112	0.666502	0.750229	0.826723	0.796998	0.838338
TCGA-CZ-4858-01A-01R-1305-07	0.628143	0.825209	0.759534	0.702887	0.702338	0.9739	0.776581	0.968896	0.712618	0.953632	0.484447	0.867963	0.844498	0.567985	0.99531	0.773057	0.726143	0.876479	0.761055	0.806871	0.793548	0.971364	0.839466	0.732681	0.702611	0.846855	0.852383	0.836253	0.763951
TCGA-AK-3450-01A-02R-1277-07	0.574979	0.791391	0.786766	0.678722	0.676997	0.832846	0.750446	0.889416	0.682802	0.939034	0.5555	0.765489	0.784399	0.675454	0.991053	0.758282	0.624423	0.848575	0.743391	0.71298	0.715961	0.911853	0.541195	0.63736	0.62272	0.773591	0.825279	0.82396	0.825835
TCGA-B0-5102-01A-01R-1420-07	0.601083	0.825447	0.757751	0.672374	0.668147	0.884869	0.75349	0.895007	0.677027	0.937183	0.562987	0.789961	0.828613	0.64234	0.992329	0.759512	0.650973	0.847983	0.716632	0.74663	0.702116	0.94947	0.606377	0.630732	0.640758	0.79108	0.829078	0.838824	0.794838
TCGA-BP-4167-01A-02R-1325-07	0.622502	0.869776	0.818854	0.718085	0.720996	0.971463	0.815749	0.975384	0.742269	0.970763	0.634658	0.865507	0.892053	0.761828	0.994164	0.80731	0.716147	0.887501	0.799068	0.815286	0.813038	0.985829	0.789391	0.706716	0.756209	0.865885	0.847747	0.832267	0.843885
TCGA-BP-4989-01A-01R-1334-07	0.663932	0.848736	0.822336	0.762031	0.698936	0.991136	0.811414	0.989985	0.618878	0.965098	0.534749	0.866186	0.847695	0.584916	0.998352	0.80324	0.685092	0.860115	0.784167	0.832596	0.801387	0.984237	0.748613	0.716756	0.742336	0.881922	0.844904	0.829409	0.735051
TCGA-BP-5200-01A-01R-1426-07	0.761986	0.830378	0.819943	0.720023	0.721606	0.944871	0.789393	0.948096	0.727684	0.9508	0.577273	0.825665	0.859762	0.75152	0.997026	0.834465	0.67256	0.875459	0.766649	0.77154	0.769771	0.971659	0.683652	0.686283	0.677255	0.837945	0.852221	0.821753	0.841687
TCGA-B0-4818-01A-01R-1503-07	0.673599	0.809609	0.769394	0.728165	0.69793	0.903953	0.773652	0.954497	0.641604	0.963066	0.5771	0.838905	0.755684	0.715915	0.995643	0.816675	0.683156	0.861727	0.728996	0.769088	0.777548	0.959376	0.678823	0.674825	0.660628	0.833435	0.839754	0.834372	0.837131
TCGA-B0-4714-01A-01R-1277-07	0.694632	0.835885	0.788626	0.669125	0.691618	0.975944	0.800722	0.988545	0.631355	0.970502	0.526192	0.859287	0.801478	0.646198	0.997934	0.786338	0.755439	0.863503	0.763549	0.807337	0.788081	0.951514	0.669677	0.723799	0.707798	0.849438	0.834554	0.859456	0.773402
TCGA-3Z-A93Z-01A-11R-A37O-07	0.560753	0.812231	0.743254	0.686661	0.685776	0.823589	0.750893	0.913788	0.698179	0.937369	0.578771	0.807417	0.775677	0.666585	0.994172	0.770227	0.702255	0.854283	0.729951	0.731943	0.713782	0.917435	0.621992	0.654851	0.704885	0.790524	0.827086	0.810843	0.784162
TCGA-DV-5574-01A-01R-1541-07	0.633546	0.86332	0.783391	0.737697	0.715614	0.949215	0.775033	0.944378	0.705931	0.956034	0.826242	0.827031	0.853876	0.795814	0.99395	0.806445	0.689184	0.89219	0.774081	0.769494	0.753736	0.986399	0.62879	0.689093	0.688215	0.847112	0.850191	0.870344	0.906645
TCGA-BP-5194-01A-02R-1426-07	0.612426	0.814597	0.787136	0.716149	0.691379	0.835028	0.768206	0.933353	0.69072	0.925445	0.621587	0.784308	0.846546	0.816494	0.991089	0.792538	0.675278	0.861815	0.768032	0.754709	0.732671	0.967591	0.573499	0.637022	0.653125	0.809397	0.837695	0.817348	0.831249
TCGA-BP-4961-01A-01R-1334-07	0.527805	0.789516	0.760515	0.684558	0.671516	0.792714	0.735838	0.885758	0.694107	0.911535	0.575252	0.739036	0.809855	0.712905	0.990786	0.775397	0.64062	0.847187	0.717656	0.709292	0.69773	0.965114	0.533895	0.597526	0.592126	0.78645	0.831893	0.82756	0.865225
TCGA-BP-4963-01A-01R-1334-07	0.602551	0.797989	0.797001	0.663177	0.688247	0.871839	0.769814	0.916651	0.706705	0.934032	0.692073	0.781481	0.855983	0.628424	0.993358	0.801597	0.627546	0.863067	0.74275	0.73275	0.758774	0.973565	0.595973	0.652239	0.608723	0.82004	0.841011	0.832727	0.858908
TCGA-AK-3460-01A-02R-1277-07	0.529362	0.818777	0.734853	0.648521	0.681284	0.862661	0.744497	0.936113	0.665008	0.954386	0.529642	0.781794	0.819994	0.657714	0.993605	0.76598	0.758506	0.859542	0.744419	0.726435	0.715971	0.944282	0.606796	0.618402	0.693425	0.793747	0.825235	0.838404	0.848047
TCGA-B8-5545-01A-01R-1672-07	0.59472	0.846324	0.774958	0.70348	0.70498	0.832316	0.766882	0.920868	0.750775	0.945741	0.591569	0.791673	0.859521	0.764513	0.992513	0.817951	0.687309	0.889437	0.78065	0.757849	0.734707	0.976081	0.621102	0.660701	0.657106	0.820708	0.847705	0.843406	0.867548
TCGA-BP-4165-01A-02R-1289-07	0.574384	0.808011	0.763798	0.677096	0.679464	0.913563	0.764477	0.978639	0.603276	0.947111	0.54327	0.823949	0.76257	0.769571	0.994478	0.772376	0.723889	0.844517	0.738898	0.735841	0.749853	0.950217	0.655198	0.671128	0.705468	0.812219	0.816998	0.847019	0.786223
TCGA-DV-A4VX-01A-11R-A266-07	0.596917	0.759411	0.797216	0.618275	0.684555	0.907667	0.746845	0.890098	0.591121	0.915584	0.506741	0.745131	0.833292	0.362119	0.992441	0.748213	0.534896	0.862963	0.723413	0.725708	0.73351	0.911283	0.641575	0.642245	0.650233	0.770518	0.818404	0.885344	0.744768
TCGA-B0-4846-01A-01R-1277-07	0.713592	0.839257	0.786563	0.669647	0.709298	0.943024	0.779637	0.937587	0.703422	0.966436	0.605341	0.831438	0.797105	0.64941	0.999097	0.810562	0.51517	0.87331	0.766667	0.785318	0.773247	0.959651	0.701323	0.698158	0.661971	0.823171	0.84832	0.853368	0.804658
TCGA-CZ-5453-01A-01R-1503-07	0.613871	0.80359	0.719621	0.613179	0.66407	0.693483	0.70292	0.838044	0.664835	0.894552	0.505164	0.671642	0.812296	0.709692	0.989232	0.769513	0.631767	0.838256	0.735737	0.6466	0.634446	0.906174	0.397336	0.622304	0.497398	0.738198	0.815294	0.823641	0.836597
TCGA-B0-5095-01A-01R-1420-07	0.665193	0.789924	0.793194	0.6832	0.696379	0.905584	0.759959	0.925385	0.736144	0.918524	0.543027	0.805664	0.835535	0.643374	0.989196	0.790574	0.684216	0.868141	0.708739	0.714932	0.750882	0.957803	0.603012	0.665199	0.591088	0.813036	0.83804	0.832261	0.843629
TCGA-BP-4972-01A-01R-1334-07	0.632445	0.86031	0.803746	0.696854	0.6988	0.848097	0.777557	0.909036	0.747415	0.95219	0.630684	0.790373	0.885078	0.739685	0.990332	0.80598	0.676689	0.869665	0.783569	0.753983	0.73765	0.983805	0.610593	0.636317	0.62406	0.823259	0.844036	0.84436	0.870901
TCGA-B0-4712-01A-01R-1503-07	0.761117	0.844941	0.800599	0.744259	0.721289	0.903481	0.786956	0.941787	0.735594	0.944439	0.579187	0.857236	0.864995	0.500532	0.992893	0.777038	0.702164	0.888552	0.789067	0.789183	0.779284	0.965095	0.779969	0.71715	0.709943	0.828934	0.855187	0.826081	0.815986
TCGA-BP-4164-01A-02R-1325-07	0.571864	0.786088	0.762366	0.576109	0.659719	0.848353	0.731585	0.864165	0.621343	0.950945	0.55741	0.746588	0.785123	0.587869	0.993001	0.771094	0.505385	0.841219	0.709998	0.71345	0.676611	0.928795	0.646867	0.586244	0.609081	0.758161	0.817877	0.830429	0.816417
TCGA-CZ-5454-01A-01R-1503-07	0.799407	0.86685	0.803538	0.676636	0.711537	0.870109	0.785693	0.931901	0.778344	0.952291	0.729978	0.793173	0.903746	0.637341	0.991343	0.80152	0.724358	0.869691	0.779367	0.773035	0.752868	0.986773	0.649421	0.649315	0.69929	0.825635	0.845227	0.824675	0.813684
TCGA-BP-5202-01A-02R-1426-07	0.573932	0.815406	0.754015	0.656335	0.678536	0.798708	0.724223	0.90173	0.665758	0.951901	0.539496	0.756414	0.821614	0.688145	0.995591	0.783511	0.686917	0.843109	0.709537	0.713635	0.677694	0.955209	0.471881	0.596092	0.609495	0.782982	0.821399	0.821244	0.847151
TCGA-CZ-5470-01A-01R-1503-07	0.737144	0.851842	0.788033	0.696157	0.711652	0.944812	0.793314	0.949423	0.730125	0.961135	0.694747	0.833578	0.831187	0.688895	0.997	0.809992	0.710184	0.869877	0.774861	0.806265	0.784775	0.970912	0.690609	0.732231	0.702183	0.837706	0.846234	0.837765	0.80545
TCGA-CJ-4902-01A-01R-1426-07	0.601062	0.810672	0.790814	0.70803	0.701122	0.885675	0.781136	0.956116	0.718015	0.946632	0.589263	0.827317	0.853728	0.743842	0.992195	0.798057	0.712503	0.879044	0.768441	0.756344	0.768055	0.974627	0.677125	0.667184	0.645622	0.838526	0.840702	0.845074	0.85146
TCGA-CJ-4905-01A-02R-1426-07	0.595088	0.811393	0.761147	0.690868	0.690489	0.831706	0.740739	0.937035	0.719143	0.919652	0.62262	0.786441	0.808076	0.765626	0.990044	0.804532	0.685297	0.865186	0.736846	0.709613	0.709314	0.951789	0.5542	0.614571	0.633408	0.797763	0.83093	0.842352	0.834423
TCGA-B0-5075-01A-01R-1334-07	0.621637	0.832467	0.788274	0.607651	0.682844	0.938563	0.768013	0.924151	0.703927	0.965871	0.64839	0.754309	0.900876	0.63752	0.995545	0.791973	0.593848	0.873463	0.776425	0.771943	0.744828	0.981073	0.58473	0.619999	0.631971	0.813848	0.834604	0.840776	0.776971
TCGA-BP-4798-01A-01R-1305-07	0.694719	0.879727	0.778683	0.709884	0.711031	0.991548	0.808477	0.967272	0.605132	0.982085	0.389724	0.857477	0.79597	0.66832	0.999045	0.827472	0.642361	0.891145	0.793157	0.843727	0.80199	0.991745	0.809525	0.775974	0.726305	0.883365	0.863824	0.883804	0.784639
TCGA-CJ-4882-01A-02R-1426-07	0.727001	0.806444	0.74443	0.763308	0.707151	0.946424	0.777237	0.955131	0.767984	0.961485	0.684698	0.845208	0.820953	0.733509	0.995245	0.843338	0.636725	0.893555	0.756046	0.77376	0.814353	0.98184	0.724909	0.696247	0.718079	0.863791	0.848715	0.840181	0.835188
TCGA-B0-5706-01A-11R-1541-07	0.584071	0.849124	0.774209	0.781098	0.703252	0.978223	0.797704	0.968162	0.595129	0.968239	0.300896	0.869898	0.830724	0.697176	0.996313	0.770069	0.628484	0.870159	0.779052	0.816892	0.797715	0.960476	0.801919	0.716633	0.714822	0.861524	0.857275	0.811636	0.822584
TCGA-CJ-4891-01A-01R-1305-07	0.74889	0.825505	0.799805	0.627866	0.721587	0.8298	0.763836	0.896479	0.794582	0.9496	0.483644	0.777442	0.882907	0.553863	0.994366	0.826417	0.631774	0.89748	0.75308	0.739089	0.741206	0.955327	0.640931	0.691083	0.659688	0.804293	0.829102	0.889366	0.800189
TCGA-CZ-5988-01A-11R-1672-07	0.706434	0.815885	0.804562	0.701289	0.697926	0.886854	0.769394	0.897892	0.698697	0.947164	0.632697	0.808477	0.839216	0.648896	0.993313	0.783743	0.658647	0.874391	0.736895	0.74986	0.727862	0.961125	0.663847	0.664232	0.666639	0.805763	0.848863	0.814128	0.84558
TCGA-AK-3440-01A-02R-1277-07	0.821972	0.775665	0.67174	0.559248	0.626135	0.686762	0.670198	0.773509	0.587683	0.894974	0.433922	0.729071	0.765132	0.399324	0.981996	0.718388	0.74964	0.82801	0.655217	0.669443	0.582645	0.831785	0.490008	0.565424	0.638562	0.696892	0.811271	0.792471	0.810978
TCGA-AK-3453-01A-02R-1277-07	0.713569	0.820644	0.808048	0.662311	0.703001	0.976455	0.807752	0.96288	0.574275	0.975587	0.558913	0.862025	0.78614	0.589124	0.998202	0.790919	0.661321	0.867444	0.787768	0.812185	0.816036	0.976867	0.759584	0.707486	0.688104	0.851107	0.828561	0.855134	0.749833
TCGA-B0-5697-01A-11R-1541-07	0.742966	0.826734	0.798918	0.707698	0.716144	0.964034	0.792204	0.970212	0.729049	0.972259	0.69807	0.824347	0.857691	0.725491	0.99734	0.819185	0.665752	0.873081	0.795646	0.795021	0.776215	0.977575	0.662176	0.726506	0.696357	0.846258	0.851913	0.820322	0.80656
TCGA-B0-4841-01A-01R-1277-07	0.589292	0.786612	0.773904	0.614496	0.687094	0.858062	0.762438	0.95177	0.707087	0.916188	0.546418	0.786733	0.816381	0.683386	0.990433	0.785339	0.683531	0.860511	0.732458	0.701516	0.721875	0.94493	0.573238	0.614411	0.719201	0.773907	0.821766	0.829031	0.863213
TCGA-CJ-5679-01A-11R-1541-07	0.581628	0.730548	0.775576	0.567967	0.671285	0.808338	0.72217	0.878195	0.604211	0.916258	0.488694	0.720021	0.846046	0.519792	0.985606	0.739742	0.654096	0.848477	0.696669	0.673817	0.677482	0.891807	0.513405	0.591998	0.706226	0.736377	0.825324	0.792071	0.868265
TCGA-B0-4845-01A-01R-1277-07	0.561246	0.773391	0.725771	0.621665	0.66071	0.702406	0.713906	0.819712	0.616424	0.913859	0.527177	0.688286	0.771653	0.654738	0.988061	0.764003	0.535315	0.833105	0.679888	0.668522	0.694728	0.908984	0.563353	0.582456	0.581277	0.760478	0.812102	0.819265	0.773353
TCGA-CZ-5465-01A-01R-1503-07	0.624656	0.83969	0.770216	0.614266	0.691224	0.761936	0.740945	0.829211	0.662925	0.927699	0.548351	0.742372	0.809623	0.676238	0.990583	0.772298	0.600679	0.85524	0.734791	0.705348	0.684327	0.931448	0.551759	0.642695	0.587606	0.762729	0.83284	0.84438	0.844122
TCGA-CJ-5686-01A-11R-1672-07	0.712201	0.822601	0.796165	0.718285	0.713862	0.889389	0.785392	0.944439	0.697795	0.963403	0.628216	0.818905	0.835548	0.647211	0.99408	0.817548	0.656043	0.87488	0.761626	0.767744	0.774705	0.976337	0.675135	0.686628	0.67986	0.832135	0.845723	0.825445	0.840976
TCGA-BP-4345-01A-01R-1289-07	0.7492	0.878953	0.808829	0.663368	0.716298	0.851439	0.787555	0.93919	0.765388	0.948369	0.590399	0.798173	0.87014	0.685081	0.992018	0.785563	0.667041	0.881662	0.765006	0.756374	0.789213	0.982704	0.616815	0.674183	0.685097	0.828333	0.847121	0.818077	0.85625
TCGA-B0-5693-01A-11R-1541-07	0.584012	0.813076	0.743427	0.645507	0.673365	0.742479	0.721683	0.838571	0.714002	0.9277	0.602672	0.729653	0.78359	0.729968	0.989929	0.77677	0.610952	0.845996	0.722581	0.68166	0.663134	0.920639	0.502058	0.594191	0.581052	0.754517	0.81516	0.840411	0.853025
TCGA-B0-4838-01A-01R-1305-07	0.597027	0.848306	0.793878	0.713274	0.69798	0.992433	0.79822	0.981629	0.667372	0.971775	0.482666	0.842104	0.774756	0.649275	0.998535	0.802423	0.615945	0.862192	0.751602	0.823442	0.78974	0.972072	0.751158	0.712743	0.715609	0.854378	0.857382	0.838951	0.825929
TCGA-B8-5549-01A-01R-1541-07	0.587038	0.8278	0.768847	0.681068	0.687394	0.951652	0.766961	0.940494	0.681893	0.962917	0.537371	0.795182	0.827424	0.723222	0.995819	0.814591	0.630134	0.860154	0.763605	0.756287	0.719343	0.965232	0.676594	0.657941	0.63156	0.811817	0.844001	0.822248	0.870672
TCGA-CJ-4876-01A-01R-1305-07	0.584868	0.771244	0.767211	0.682513	0.671746	0.957037	0.760331	0.947444	0.577566	0.959994	0.321325	0.829293	0.697782	0.628831	0.995083	0.753537	0.612434	0.840412	0.71104	0.767979	0.749982	0.890392	0.724273	0.641812	0.698442	0.801369	0.826944	0.827282	0.755539
TCGA-BP-4337-01A-01R-1289-07	0.555496	0.814064	0.732457	0.700001	0.683167	0.801872	0.74069	0.869961	0.728889	0.898593	0.526775	0.777928	0.804614	0.784607	0.98802	0.754501	0.622676	0.864627	0.713016	0.730036	0.727328	0.944026	0.678087	0.627214	0.648952	0.795794	0.819063	0.810512	0.800205
TCGA-BP-4985-01A-01R-1334-07	0.771217	0.800399	0.788886	0.676009	0.709647	0.772687	0.754652	0.892091	0.745343	0.942418	0.650222	0.756369	0.885224	0.684505	0.993352	0.789586	0.725536	0.883584	0.732406	0.707399	0.74516	0.945874	0.629288	0.64753	0.723792	0.790696	0.840457	0.874633	0.809302
TCGA-A3-3374-01A-02R-1325-07	0.810032	0.904865	0.754083	0.663529	0.679722	0.758438	0.735155	0.84562	0.812941	0.939407	0.749621	0.705053	0.950534	0.730273	0.985693	0.807174	0.662664	0.867428	0.760634	0.769592	0.699566	0.986399	0.559814	0.604493	0.683755	0.791957	0.834736	0.782297	0.83963
TCGA-A3-3373-01A-02R-1420-07	0.690265	0.812979	0.767138	0.697515	0.683089	0.807729	0.756145	0.889096	0.753294	0.942684	0.705413	0.746263	0.845947	0.770973	0.993969	0.802682	0.657178	0.857564	0.750946	0.752945	0.702706	0.964584	0.60802	0.587942	0.560734	0.797148	0.832124	0.79387	0.809214
TCGA-B0-5700-01A-11R-1541-07	0.604519	0.804853	0.787323	0.637002	0.701745	0.818814	0.760216	0.89462	0.739412	0.955072	0.555683	0.786893	0.822385	0.747875	0.99423	0.78486	0.644974	0.860824	0.765891	0.736127	0.727459	0.932725	0.649355	0.666678	0.603843	0.79095	0.824182	0.81194	0.83093
TCGA-B4-5378-01A-01R-1503-07	0.553487	0.806769	0.703136	0.636717	0.661245	0.7878	0.703242	0.870309	0.658112	0.91072	0.576745	0.730852	0.792544	0.814345	0.989978	0.784472	0.651036	0.862807	0.714091	0.665508	0.636836	0.927262	0.511438	0.581216	0.608439	0.751571	0.819347	0.864854	0.830052
TCGA-B0-5709-01A-11R-1541-07	0.6222	0.851479	0.794557	0.786458	0.729141	0.956899	0.801626	0.956783	0.781372	0.97221	0.686347	0.854873	0.836717	0.805731	0.998489	0.832747	0.678946	0.896241	0.826849	0.798617	0.795281	0.987166	0.758855	0.719618	0.704027	0.873103	0.856949	0.85973	0.877486
TCGA-BP-4351-01A-01R-1289-07	0.52477	0.750947	0.718858	0.546409	0.648077	0.822312	0.718847	0.915411	0.557832	0.944108	0.55071	0.750187	0.76159	0.604007	0.986857	0.738172	0.668111	0.828793	0.704793	0.683487	0.694722	0.92565	0.558066	0.559366	0.550461	0.766591	0.805977	0.805532	0.738375
TCGA-BP-4774-01A-01R-1289-07	0.622018	0.784707	0.789449	0.659694	0.690468	0.853876	0.750082	0.902577	0.645266	0.920775	0.511355	0.775756	0.774393	0.642937	0.992792	0.755628	0.564836	0.845607	0.733779	0.71645	0.73646	0.953008	0.595139	0.609218	0.564187	0.789944	0.823089	0.843338	0.825872
TCGA-BP-4986-01A-01R-1334-07	0.750788	0.802093	0.81384	0.683674	0.702912	0.796271	0.7645	0.883696	0.660263	0.944311	0.485633	0.759808	0.823519	0.638971	0.991966	0.784274	0.644103	0.878349	0.736288	0.737436	0.760398	0.971974	0.593856	0.655047	0.734957	0.814421	0.843582	0.839475	0.832964
TCGA-B0-5113-01A-01R-1420-07	0.711707	0.81974	0.779883	0.72145	0.700443	0.90238	0.771234	0.913906	0.724922	0.949107	0.577011	0.810065	0.81476	0.737114	0.995128	0.789047	0.616664	0.870561	0.729126	0.775603	0.760154	0.973683	0.675072	0.67222	0.674428	0.832128	0.845827	0.811215	0.835849
TCGA-A3-A6NL-01A-11R-A33J-07	0.60697	0.805289	0.761202	0.681575	0.685381	0.829171	0.762727	0.95058	0.675517	0.940968	0.563897	0.807802	0.810332	0.677638	0.993209	0.805166	0.705561	0.86505	0.754393	0.733657	0.747403	0.97219	0.601554	0.639683	0.578948	0.818855	0.834365	0.855286	0.849032
TCGA-CJ-5680-01A-11R-1541-07	0.701683	0.787549	0.750106	0.641304	0.676256	0.758792	0.735642	0.850502	0.66828	0.935971	0.615442	0.712664	0.807487	0.670642	0.993514	0.805211	0.618356	0.852061	0.728782	0.713871	0.690311	0.944911	0.553476	0.571297	0.581408	0.774523	0.822109	0.811267	0.80719
TCGA-B0-5402-01A-01R-1503-07	0.581664	0.838216	0.762395	0.6758	0.690143	0.790198	0.758128	0.919386	0.658993	0.940569	0.568961	0.790767	0.806181	0.695714	0.992511	0.786229	0.766078	0.861763	0.730736	0.755975	0.726099	0.931998	0.623105	0.643598	0.650481	0.797037	0.836359	0.819929	0.842318
TCGA-CZ-4862-01A-01R-1305-07	0.619706	0.86587	0.792777	0.729769	0.705849	0.986085	0.808286	0.976271	0.742521	0.976474	0.618425	0.86273	0.831344	0.669138	0.998908	0.82163	0.734758	0.88041	0.788133	0.819341	0.791185	0.983923	0.775073	0.700292	0.73456	0.870097	0.854887	0.857049	0.816437
TCGA-CW-6097-01A-11R-1672-07	0.636627	0.86392	0.801169	0.817275	0.725482	0.931291	0.797905	0.93792	0.80604	0.953766	0.752482	0.8617	0.868925	0.774776	0.996981	0.825738	0.661234	0.894762	0.807289	0.790346	0.801106	0.987166	0.799552	0.70642	0.697038	0.873647	0.861334	0.861826	0.875462
TCGA-B4-5843-01A-11R-1672-07	0.693286	0.798352	0.758623	0.672683	0.672613	0.754881	0.719961	0.84157	0.686401	0.932704	0.585494	0.719608	0.832686	0.690585	0.988001	0.738566	0.588809	0.843621	0.689525	0.691428	0.628893	0.939054	0.488222	0.609112	0.61425	0.756206	0.826177	0.816293	0.824734
TCGA-A3-3307-01A-01R-0864-07	0.730948	0.821573	0.78175	0.666016	0.69748	0.92339	0.765729	0.936099	0.676351	0.948312	0.560765	0.806028	0.813113	0.648767	0.996498	0.82141	0.724111	0.853123	0.758047	0.749386	0.733175	0.962127	0.653848	0.622905	0.690159	0.81302	0.836677	0.839723	0.830826
TCGA-B0-4688-01A-01R-1277-07	0.62083	0.901972	0.753155	0.604344	0.670507	0.739158	0.71928	0.849945	0.666357	0.881002	0.435097	0.738335	0.825712	0.685455	0.972534	0.760915	0.674187	0.852716	0.663126	0.706716	0.700307	0.948861	0.561312	0.635915	0.633918	0.759946	0.84298	0.800577	0.702184
TCGA-CJ-5689-01A-11R-1541-07	0.590086	0.823912	0.780798	0.700439	0.721048	0.915882	0.782106	0.974282	0.777367	0.932263	0.754742	0.814708	0.867335	0.808403	0.994204	0.796058	0.749597	0.879589	0.757613	0.768843	0.766685	0.971168	0.64508	0.696562	0.704061	0.832472	0.845767	0.808464	0.86175
TCGA-BP-4335-01A-01R-1289-07	0.634572	0.825802	0.778632	0.662148	0.682562	0.954069	0.776641	0.932754	0.659033	0.966835	0.554792	0.823454	0.788993	0.603358	0.995513	0.766879	0.58188	0.874431	0.730389	0.765568	0.766212	0.959376	0.692434	0.65708	0.632106	0.826588	0.834185	0.851226	0.813681
TCGA-CJ-4908-01A-01R-1426-07	0.699243	0.822415	0.768884	0.667777	0.691146	0.883886	0.755009	0.921569	0.660247	0.947121	0.528109	0.782642	0.83218	0.772842	0.994393	0.779201	0.638616	0.865067	0.736594	0.721167	0.732745	0.970106	0.612932	0.606518	0.615264	0.807076	0.836982	0.83789	0.8714
TCGA-CZ-5458-01A-01R-1503-07	0.564283	0.813263	0.766746	0.717231	0.691771	0.896681	0.768494	0.930985	0.669253	0.95424	0.588603	0.785561	0.787076	0.724621	0.991182	0.803536	0.676689	0.866402	0.732108	0.748853	0.755572	0.960064	0.648418	0.704934	0.664128	0.819824	0.850123	0.837352	0.863025
TCGA-B0-4690-01A-01R-1277-07	0.650351	0.860606	0.799778	0.693356	0.719009	0.949785	0.78827	0.953108	0.715619	0.946877	0.600391	0.857574	0.858608	0.658345	0.993649	0.818493	0.60557	0.888098	0.766127	0.818239	0.767336	0.985888	0.757369	0.743858	0.731337	0.847553	0.858837	0.830584	0.822764
TCGA-CJ-4900-01A-01R-1334-07	0.695425	0.823868	0.782866	0.753369	0.721599	0.971109	0.790721	0.967218	0.803667	0.961893	0.535873	0.870889	0.84313	0.670707	0.997234	0.805358	0.632791	0.886695	0.775943	0.797375	0.795203	0.977024	0.762247	0.746888	0.700592	0.862776	0.848904	0.852035	0.810999
TCGA-A3-3359-01A-01R-0864-07	0.572326	0.835564	0.784532	0.67847	0.679119	0.947328	0.774664	0.950667	0.674322	0.965248	0.558803	0.823315	0.812339	0.705397	0.997039	0.818016	0.628006	0.852849	0.728105	0.773774	0.743304	0.972347	0.692812	0.645094	0.628189	0.825569	0.83695	0.848126	0.826867
TCGA-CJ-4907-01A-01R-1426-07	0.706495	0.800427	0.776809	0.638981	0.681434	0.808417	0.759773	0.899414	0.677674	0.93624	0.532476	0.769881	0.822181	0.703557	0.989053	0.792609	0.586199	0.859475	0.746361	0.712787	0.713486	0.96539	0.516836	0.622338	0.629926	0.791579	0.83276	0.80845	0.830121
TCGA-CZ-5460-01A-01R-1503-07	0.630225	0.850577	0.805244	0.7175	0.710292	0.947937	0.800584	0.940241	0.668724	0.939396	0.682398	0.828903	0.821111	0.722125	0.99593	0.81168	0.670717	0.870046	0.777915	0.797723	0.795713	0.959435	0.714511	0.725784	0.694499	0.833223	0.860927	0.853195	0.847729
TCGA-B8-4622-01A-02R-1277-07	0.585707	0.800651	0.78565	0.665837	0.691374	0.822037	0.777122	0.953519	0.66114	0.937876	0.612378	0.800075	0.83751	0.651065	0.992636	0.809959	0.74457	0.858877	0.759466	0.748312	0.75308	0.97559	0.602112	0.666657	0.668212	0.819388	0.839543	0.834262	0.8353
TCGA-BP-4994-01A-01R-1334-07	0.624377	0.776423	0.724769	0.676989	0.665073	0.832846	0.714916	0.885229	0.632851	0.929126	0.459498	0.774605	0.796422	0.711721	0.986508	0.771923	0.660197	0.842839	0.70398	0.700169	0.659842	0.911185	0.56731	0.575389	0.650943	0.763126	0.827619	0.800832	0.830811
TCGA-B0-4703-01A-01R-1277-07	0.570905	0.835216	0.800984	0.681297	0.698763	0.933885	0.774441	0.934556	0.690224	0.960471	0.597523	0.824207	0.829827	0.659925	0.996916	0.786384	0.654257	0.873764	0.722497	0.765605	0.762532	0.971934	0.700515	0.693527	0.663022	0.830044	0.842744	0.854901	0.877201
TCGA-BP-4346-01A-01R-1289-07	0.749175	0.858853	0.804391	0.718227	0.71021	0.993435	0.818749	0.98785	0.701068	0.97026	0.562674	0.864927	0.793946	0.704643	0.999516	0.785668	0.675461	0.876729	0.774972	0.835027	0.813955	0.987991	0.801466	0.748719	0.731621	0.879749	0.853406	0.865139	0.807601
TCGA-B0-4839-01A-01R-1305-07	0.749155	0.814655	0.78626	0.649723	0.688716	0.846958	0.763206	0.956358	0.740015	0.956372	0.549957	0.814152	0.813554	0.731643	0.99063	0.794399	0.722385	0.86262	0.775837	0.738439	0.732177	0.971109	0.583152	0.634729	0.622226	0.808311	0.829284	0.829901	0.86904
TCGA-CZ-5985-01A-11R-1672-07	0.761919	0.845761	0.772934	0.724315	0.710361	0.888171	0.780898	0.93125	0.743531	0.963624	0.697957	0.827538	0.871689	0.677302	0.995285	0.824135	0.710737	0.876385	0.787527	0.787687	0.761355	0.976415	0.674751	0.730818	0.690759	0.841503	0.856414	0.853512	0.815509
TCGA-CZ-4865-01A-02R-1503-07	0.726409	0.837528	0.804949	0.703461	0.706737	0.924215	0.782809	0.95897	0.735211	0.964418	0.613366	0.828061	0.83511	0.747808	0.995344	0.782263	0.754232	0.886207	0.781643	0.756414	0.749889	0.961714	0.57996	0.677198	0.662187	0.825881	0.84649	0.857025	0.825965
TCGA-CJ-5675-01A-11R-1541-07	0.725708	0.863169	0.801322	0.721224	0.713807	0.98974	0.812203	0.987139	0.719492	0.978015	0.641882	0.853188	0.822662	0.688895	0.998862	0.807922	0.691674	0.880122	0.791795	0.82379	0.799983	0.984925	0.7475	0.727125	0.762365	0.861365	0.850386	0.855445	0.812899
TCGA-AK-3429-01A-02R-1325-07	0.608831	0.845848	0.813435	0.738157	0.706292	0.978774	0.812002	0.979195	0.718819	0.973348	0.71266	0.866213	0.810897	0.735776	0.997999	0.803173	0.725312	0.871037	0.787706	0.818451	0.799885	0.963208	0.776457	0.757024	0.735459	0.855334	0.856376	0.85931	0.847252
TCGA-B0-4843-01A-01R-1277-07	0.68918	0.773793	0.766013	0.653426	0.695703	0.746037	0.748268	0.882934	0.601028	0.919736	0.68539	0.739601	0.790027	0.693758	0.988219	0.805221	0.647946	0.859636	0.700695	0.681743	0.755202	0.944203	0.567916	0.59928	0.681688	0.785081	0.822766	0.8076	0.823815
TCGA-CJ-4886-01A-01R-1305-07	0.589571	0.82469	0.784058	0.692467	0.710148	0.929876	0.781459	0.961138	0.716181	0.954986	0.546517	0.825049	0.810731	0.769204	0.995285	0.777617	0.677209	0.866516	0.761122	0.774771	0.774483	0.968888	0.651448	0.672698	0.688215	0.829523	0.849333	0.833991	0.8511
TCGA-B0-5083-01A-02R-1420-07	0.607826	0.840722	0.741577	0.701456	0.69828	0.893477	0.751644	0.913702	0.761012	0.950106	0.707064	0.797157	0.877596	0.682133	0.979767	0.797804	0.673788	0.859388	0.782408	0.757444	0.732702	0.975354	0.655242	0.626519	0.713825	0.817117	0.837748	0.777245	0.860128
TCGA-B0-5117-01A-01R-1420-07	0.741201	0.761417	0.63617	0.618792	0.631808	0.646511	0.648349	0.810024	0.463439	0.885704	0.258749	0.722817	0.712668	0.60313	0.969016	0.703814	0.622759	0.814962	0.652773	0.642205	0.580281	0.833593	0.537165	0.499265	0.684904	0.681983	0.804347	0.784071	0.803778
TCGA-BP-4325-01A-02R-1289-07	0.586852	0.821969	0.769345	0.61696	0.671164	0.967139	0.758418	0.959824	0.627901	0.963469	0.55179	0.809058	0.793068	0.623277	0.997895	0.787053	0.618658	0.845061	0.750563	0.758554	0.734317	0.958118	0.62525	0.648231	0.597246	0.813642	0.827629	0.827613	0.804775
TCGA-CW-5580-01A-01R-1672-07	0.606983	0.814702	0.789752	0.653077	0.701556	0.732731	0.7553	0.846311	0.725436	0.92831	0.697639	0.749121	0.84483	0.696339	0.990655	0.824518	0.695982	0.873971	0.736913	0.7283	0.701702	0.945264	0.588713	0.618354	0.658329	0.780759	0.834676	0.815993	0.86288
TCGA-BP-5000-01A-01R-1334-07	0.641331	0.804579	0.784873	0.666585	0.706307	0.932568	0.786406	0.953289	0.702115	0.963103	0.613648	0.837887	0.816686	0.68004	0.992596	0.782198	0.655196	0.881833	0.766217	0.761451	0.790493	0.970775	0.701906	0.707397	0.694119	0.829462	0.844956	0.849396	0.845902
TCGA-B0-5106-01A-01R-1420-07	0.626797	0.795755	0.767085	0.677632	0.686408	0.938622	0.762136	0.949502	0.614008	0.966836	0.513391	0.802325	0.829197	0.742942	0.992585	0.8074	0.702186	0.863616	0.743248	0.753435	0.741073	0.974135	0.637075	0.666712	0.661543	0.827457	0.831081	0.85715	0.844945
TCGA-CJ-6031-01A-11R-1672-07	0.722839	0.846185	0.814738	0.737453	0.722888	0.94833	0.799012	0.965611	0.760266	0.961379	0.629255	0.848147	0.871524	0.739129	0.99272	0.814672	0.708432	0.881905	0.80181	0.782844	0.784615	0.982665	0.692474	0.717834	0.719702	0.850727	0.853534	0.828187	0.866193
TCGA-B0-4852-01A-01R-1503-07	0.607519	0.792366	0.769108	0.698953	0.679201	0.84851	0.742137	0.912994	0.652015	0.944928	0.596568	0.791306	0.793828	0.649113	0.992935	0.796758	0.695804	0.859634	0.719582	0.731558	0.708543	0.924314	0.592614	0.624411	0.633716	0.794285	0.830065	0.826617	0.833879
TCGA-B0-5690-01A-11R-1541-07	0.611319	0.806998	0.754398	0.756117	0.693082	0.782612	0.759605	0.92367	0.677447	0.927232	0.653236	0.79578	0.797004	0.743421	0.994152	0.824629	0.695558	0.86658	0.754749	0.729817	0.736518	0.949922	0.567828	0.623751	0.66446	0.81493	0.832793	0.823887	0.861158
TCGA-B0-4697-01A-01R-1277-07	0.62183	0.888461	0.765438	0.824581	0.721724	0.985613	0.811147	0.971149	0.818826	0.967805	0.560148	0.904873	0.816503	0.616177	0.997992	0.789782	0.665658	0.894858	0.784526	0.852078	0.845949	0.9852	0.820207	0.789884	0.696015	0.90558	0.854131	0.863329	0.774376
TCGA-CZ-4859-01A-02R-1426-07	0.570456	0.779869	0.754655	0.672254	0.667929	0.797686	0.733114	0.88818	0.659143	0.926941	0.575715	0.764143	0.790608	0.685932	0.991052	0.769365	0.631569	0.830387	0.69905	0.720956	0.695529	0.909298	0.544059	0.608014	0.646729	0.767029	0.821447	0.817496	0.808186
TCGA-BP-4789-01A-01R-1305-07	0.680661	0.792917	0.769491	0.667535	0.6804	0.800221	0.738571	0.891139	0.715765	0.925138	0.584548	0.751631	0.788866	0.787841	0.990118	0.76257	0.684558	0.843151	0.717342	0.710548	0.700996	0.911716	0.501107	0.610468	0.664241	0.77725	0.82843	0.8102	0.868053
TCGA-CZ-5989-01A-11R-1672-07	0.612135	0.847955	0.806073	0.718244	0.69666	0.959218	0.75846	0.916089	0.653144	0.933325	0.586682	0.825093	0.808561	0.643848	0.982319	0.80251	0.824228	0.848548	0.695911	0.806835	0.702958	0.931035	0.589128	0.736413	0.72399	0.816512	0.85135	0.831141	0.814337
TCGA-A3-3347-01A-02R-1325-07	0.610972	0.836693	0.78714	0.713295	0.710928	0.878777	0.775532	0.91707	0.71712	0.950427	0.664639	0.818234	0.879748	0.68653	0.994639	0.810904	0.65808	0.887414	0.753619	0.775865	0.772359	0.987834	0.704851	0.673487	0.698928	0.847039	0.848905	0.839297	0.843754
TCGA-B0-4827-01A-02R-1420-07	0.74158	0.832328	0.75277	0.71942	0.71144	0.926711	0.772986	0.93919	0.764383	0.966526	0.363046	0.837016	0.853468	0.694553	0.99397	0.811928	0.644417	0.880556	0.783458	0.769905	0.775605	0.975472	0.747896	0.689265	0.678344	0.83638	0.845663	0.8202	0.84396
TCGA-BP-4760-01A-02R-1420-07	0.573567	0.810729	0.734306	0.623771	0.680933	0.725499	0.705307	0.778228	0.732554	0.913054	0.702956	0.675601	0.866546	0.810502	0.980841	0.765872	0.558934	0.857513	0.679961	0.67053	0.671759	0.942788	0.408599	0.569758	0.684503	0.748733	0.834536	0.814983	0.813528
TCGA-CW-5581-01A-02R-1541-07	0.592916	0.809046	0.7979	0.700461	0.694435	0.855762	0.774757	0.909774	0.754754	0.942847	0.728788	0.799418	0.792825	0.674709	0.994425	0.776801	0.604707	0.852758	0.718981	0.747286	0.749035	0.945697	0.671401	0.669114	0.692055	0.802178	0.846494	0.811132	0.863567
TCGA-AK-3427-01A-01R-0864-07	0.65623	0.744832	0.647458	0.642051	0.622849	0.598498	0.623039	0.758725	0.463851	0.887982	0.534371	0.695706	0.70663	0.430411	0.98869	0.701771	0.709315	0.809612	0.634788	0.575466	0.546431	0.801892	0.403408	0.428464	0.621573	0.668744	0.779793	0.779123	0.799531
TCGA-AK-3445-01A-02R-1277-07	0.689266	0.804865	0.778882	0.640299	0.687164	0.902852	0.767327	0.932627	0.739	0.960243	0.663847	0.812653	0.833303	0.71373	0.994608	0.768277	0.672831	0.867611	0.744307	0.76146	0.775773	0.980287	0.682832	0.645105	0.688584	0.823557	0.842356	0.827992	0.811336
TCGA-BP-4763-01A-01R-1289-07	0.594595	0.813183	0.780841	0.671841	0.697532	0.833023	0.751995	0.901032	0.669217	0.93191	0.653184	0.796393	0.786773	0.668963	0.9879	0.772918	0.717052	0.87413	0.715312	0.718715	0.731516	0.917356	0.536935	0.636123	0.655128	0.793206	0.840118	0.867578	0.849524
TCGA-BP-4776-01A-01R-1289-07	0.616025	0.795266	0.768073	0.711004	0.694568	0.859182	0.761575	0.941815	0.662313	0.946276	0.601335	0.824843	0.746123	0.688774	0.991759	0.756781	0.69888	0.853969	0.74242	0.725654	0.736421	0.937108	0.694096	0.626451	0.647983	0.806639	0.820124	0.826844	0.834305
TCGA-BP-5008-01A-01R-1334-07	0.731841	0.840275	0.784328	0.730231	0.718411	0.93528	0.78185	0.934257	0.743354	0.950352	0.648561	0.811864	0.857077	0.778749	0.996178	0.834722	0.661364	0.889228	0.750868	0.771394	0.769412	0.969478	0.652347	0.690037	0.644355	0.839832	0.846327	0.828844	0.86156
TCGA-B0-5119-01A-02R-1420-07	0.548221	0.823037	0.760302	0.66736	0.682787	0.932667	0.764931	0.954748	0.6845	0.940395	0.519066	0.785782	0.804847	0.72671	0.993274	0.770127	0.661506	0.858543	0.714564	0.744266	0.735146	0.92451	0.609176	0.641707	0.65712	0.797432	0.830278	0.81715	0.831696
TCGA-CJ-5684-01A-11R-1541-07	0.607541	0.801657	0.78246	0.707974	0.702943	0.946286	0.779791	0.965924	0.708484	0.953201	0.631453	0.829151	0.817591	0.797703	0.994581	0.768933	0.691511	0.865762	0.784784	0.749844	0.767166	0.963444	0.624496	0.691254	0.685905	0.827374	0.84672	0.848673	0.845659
TCGA-BP-4338-01A-01R-1289-07	0.708426	0.854631	0.769535	0.6848	0.694506	0.816789	0.75482	0.852203	0.765782	0.939305	0.529803	0.74861	0.881986	0.66663	0.984673	0.749722	0.591498	0.848568	0.709825	0.744157	0.736906	0.968239	0.648679	0.669291	0.710212	0.802964	0.840849	0.811663	0.803184
TCGA-B0-5085-01A-01R-1334-07	0.661068	0.785692	0.736044	0.61153	0.672605	0.810933	0.72846	0.928683	0.589981	0.944995	0.524272	0.787237	0.797682	0.708102	0.989356	0.734551	0.638564	0.830845	0.718105	0.713499	0.708248	0.939172	0.574144	0.620126	0.544425	0.763984	0.796846	0.828487	0.780607
TCGA-A3-3380-01A-01R-0864-07	0.543694	0.81434	0.716657	0.674889	0.677043	0.800045	0.731504	0.91316	0.751455	0.938511	0.618952	0.776722	0.845686	0.770335	0.988569	0.789565	0.692263	0.85128	0.743116	0.709109	0.701569	0.962284	0.580676	0.616105	0.666795	0.798698	0.822605	0.831304	0.871575
TCGA-B0-4691-01A-01R-1277-07	0.730442	0.796282	0.81256	0.731124	0.703221	0.950925	0.782957	0.955172	0.718342	0.941138	0.682713	0.860582	0.804881	0.553115	0.995109	0.789101	0.725443	0.878602	0.758609	0.784761	0.784646	0.944459	0.680401	0.701195	0.704042	0.840137	0.829953	0.84239	0.811942
TCGA-B0-5695-01A-11R-1541-07	0.588495	0.806107	0.735359	0.729166	0.686032	0.847901	0.745468	0.919674	0.649539	0.937199	0.614789	0.788657	0.775803	0.786373	0.989404	0.780448	0.656942	0.847474	0.704517	0.728911	0.71078	0.938622	0.607892	0.63643	0.660155	0.790459	0.826878	0.797043	0.841342
TCGA-A3-3317-01A-02R-1325-07	0.61358	0.814044	0.759536	0.682243	0.681833	0.894617	0.754935	0.895137	0.706265	0.945648	0.600843	0.797612	0.860572	0.668091	0.996433	0.761964	0.688997	0.860027	0.74939	0.753254	0.730888	0.96934	0.650848	0.631262	0.618513	0.813735	0.838849	0.821585	0.809738
TCGA-CJ-5672-01A-11R-1541-07	0.728106	0.856321	0.787744	0.714956	0.710089	0.980169	0.80163	0.97623	0.723325	0.980494	0.625962	0.849986	0.835956	0.746353	0.997105	0.822278	0.687536	0.879654	0.800766	0.81838	0.782876	0.985259	0.72903	0.763551	0.71352	0.860017	0.856136	0.832384	0.827425
TCGA-CJ-5677-01A-11R-1541-07	0.601715	0.799847	0.795358	0.667339	0.696851	0.812092	0.766989	0.883152	0.727316	0.94956	0.626699	0.768531	0.853961	0.579227	0.987531	0.791398	0.594985	0.879416	0.762097	0.733722	0.737172	0.974076	0.630402	0.613703	0.648244	0.800228	0.836159	0.854877	0.785216
TCGA-A3-3367-01A-02R-1420-07	0.595162	0.826024	0.785219	0.658533	0.687401	0.802069	0.751065	0.890357	0.730155	0.941109	0.691672	0.757574	0.807	0.712353	0.993071	0.790654	0.652089	0.859581	0.747596	0.741826	0.709967	0.965154	0.579655	0.638691	0.576541	0.79746	0.831354	0.85874	0.812237
TCGA-B8-A54K-01A-11R-A33J-07	0.519471	0.740105	0.656894	0.626947	0.625724	0.705275	0.665995	0.817953	0.585137	0.8754	0.611404	0.702522	0.767548	0.638747	0.983621	0.724199	0.686201	0.827423	0.62332	0.59647	0.606925	0.855546	0.537007	0.52167	0.537536	0.705088	0.800144	0.82016	0.797278
TCGA-BP-4992-01A-01R-1334-07	0.633685	0.794311	0.79394	0.681542	0.688246	0.962913	0.792865	0.96367	0.616911	0.962272	0.535542	0.857124	0.789969	0.567817	0.995309	0.775684	0.650468	0.850103	0.747174	0.803499	0.834378	0.967728	0.744173	0.731934	0.67806	0.859751	0.836361	0.790712	0.725488
TCGA-B0-5705-01A-11R-1541-07	0.597886	0.819186	0.777377	0.700899	0.692083	0.918771	0.769985	0.929321	0.697702	0.955831	0.594071	0.817999	0.763176	0.751251	0.997314	0.803073	0.648894	0.85096	0.751278	0.777877	0.754488	0.965684	0.679657	0.671719	0.689745	0.81515	0.841595	0.815365	0.811762
TCGA-CW-6088-01A-11R-1672-07	0.576003	0.786488	0.744113	0.655737	0.683373	0.775831	0.728164	0.854828	0.650747	0.931938	0.554842	0.736814	0.797413	0.743319	0.992143	0.804803	0.653767	0.85252	0.719945	0.704286	0.676055	0.936794	0.500444	0.619897	0.572772	0.776253	0.824289	0.824026	0.849827
TCGA-BP-4758-01A-01R-1289-07	0.617271	0.833494	0.787931	0.707207	0.708885	0.978793	0.800055	0.978291	0.732535	0.976227	0.600687	0.860758	0.797298	0.769493	0.995748	0.783707	0.648878	0.873965	0.793211	0.79769	0.802274	0.978125	0.769438	0.706376	0.741927	0.850043	0.839204	0.857773	0.833305
TCGA-BP-4355-01A-01R-1289-07	0.646866	0.804564	0.743861	0.618554	0.666424	0.736426	0.71855	0.819367	0.626165	0.886286	0.428485	0.709702	0.776935	0.720015	0.98759	0.741948	0.528547	0.841312	0.660942	0.674685	0.687853	0.961302	0.544382	0.590612	0.582464	0.755927	0.807228	0.83591	0.85786
TCGA-CZ-4866-01A-01R-1503-07	0.577384	0.803391	0.754067	0.618944	0.656025	0.795485	0.722603	0.834373	0.577306	0.942923	0.449808	0.709216	0.836919	0.595164	0.995651	0.780758	0.646573	0.85136	0.7171	0.71299	0.696091	0.948999	0.507223	0.594397	0.552299	0.770755	0.815193	0.822672	0.817838
TCGA-B8-4621-01A-01R-1503-07	0.602176	0.800545	0.772476	0.649891	0.690425	0.826538	0.752957	0.840354	0.671314	0.954982	0.556146	0.734911	0.870937	0.738685	0.990052	0.826763	0.661264	0.85939	0.740003	0.730255	0.704078	0.963405	0.544612	0.65535	0.54616	0.790253	0.82738	0.821316	0.819369
TCGA-BP-4995-01A-01R-1334-07	0.615205	0.793393	0.744633	0.686731	0.673422	0.867122	0.733002	0.919188	0.62314	0.937229	0.472434	0.796023	0.809172	0.745135	0.989581	0.793273	0.66089	0.852993	0.709899	0.717296	0.691267	0.939447	0.592838	0.590645	0.651138	0.788068	0.834494	0.803249	0.830937
TCGA-BP-5004-01A-01R-1334-07	0.589797	0.784577	0.747471	0.655656	0.671485	0.865412	0.735823	0.865248	0.658513	0.936546	0.588151	0.766999	0.837828	0.710339	0.994444	0.780522	0.578483	0.834753	0.724466	0.727587	0.702437	0.95403	0.607048	0.577485	0.634023	0.785228	0.821377	0.806493	0.807453
TCGA-B8-5162-01A-01R-1420-07	0.77076	0.904144	0.819136	0.797478	0.73727	0.974961	0.81209	0.967909	0.750851	0.971585	0.590069	0.874867	0.892276	0.60405	0.99713	0.829808	0.702917	0.891335	0.806851	0.826196	0.807932	0.993376	0.778397	0.751797	0.767894	0.890625	0.868525	0.846702	0.868681
TCGA-B0-4847-01A-01R-1277-07	0.745718	0.821876	0.809568	0.677151	0.708593	0.973389	0.806607	0.963523	0.678652	0.979468	0.5789	0.866322	0.776748	0.540118	0.998365	0.796816	0.655836	0.859787	0.787436	0.823484	0.822292	0.978105	0.749912	0.72843	0.671223	0.855481	0.834099	0.852457	0.753998
TCGA-BP-4769-01A-01R-1289-07	0.655464	0.770798	0.714802	0.640558	0.675453	0.670489	0.695886	0.749771	0.661976	0.899043	0.566116	0.685152	0.78938	0.72064	0.982271	0.724608	0.561973	0.864986	0.645216	0.618738	0.653179	0.909475	0.487488	0.492918	0.624873	0.727404	0.823663	0.820718	0.847619
TCGA-CZ-5982-01A-11R-1672-07	0.579879	0.786982	0.775782	0.660758	0.686283	0.79918	0.737806	0.860271	0.670881	0.922362	0.629176	0.761405	0.79192	0.776078	0.99083	0.806106	0.654828	0.832526	0.716982	0.702907	0.712999	0.915037	0.637542	0.62014	0.654615	0.775641	0.838417	0.785122	0.842758
TCGA-CJ-4870-01A-01R-1305-07	0.580779	0.818894	0.742421	0.671909	0.683904	0.727405	0.729564	0.890954	0.713259	0.934772	0.60235	0.729019	0.842091	0.788932	0.988992	0.807381	0.65398	0.858419	0.756226	0.689901	0.700527	0.944341	0.514258	0.619682	0.575443	0.77419	0.822701	0.832502	0.861537
TCGA-AK-3454-01A-02R-1277-07	0.588595	0.749142	0.758987	0.585305	0.689697	0.914742	0.751441	0.922742	0.678307	0.914324	0.483313	0.759718	0.821335	0.67649	0.985014	0.758041	0.658315	0.865002	0.75544	0.714742	0.759997	0.959867	0.61536	0.638113	0.725148	0.799189	0.814963	0.846216	0.847601
TCGA-BP-4975-01A-01R-1334-07	0.693482	0.798577	0.77089	0.67168	0.688404	0.772726	0.74378	0.884173	0.705357	0.937536	0.616742	0.742428	0.84403	0.769063	0.986909	0.803867	0.626163	0.854411	0.726892	0.715009	0.700388	0.953814	0.549577	0.594389	0.608134	0.790601	0.825279	0.806809	0.853362
TCGA-CW-5585-01A-01R-1541-07	0.582283	0.78374	0.76247	0.657985	0.658945	0.730766	0.734458	0.877388	0.670221	0.884136	0.351384	0.706162	0.756971	0.672694	0.986074	0.781033	0.677005	0.820777	0.717422	0.689818	0.66282	0.905407	0.403261	0.600917	0.577092	0.752536	0.810618	0.812775	0.821932
TCGA-B2-4098-01A-02R-1325-07	0.587311	0.85257	0.786345	0.693871	0.682382	0.782062	0.756017	0.818066	0.730497	0.962222	0.54993	0.760989	0.901554	0.674212	0.994236	0.807427	0.550411	0.856283	0.730353	0.75723	0.743592	0.974646	0.658981	0.646402	0.59658	0.807862	0.828044	0.801061	0.730017
TCGA-CJ-5678-01A-11R-1541-07	0.759649	0.838467	0.800269	0.746832	0.717006	0.970087	0.806826	0.972618	0.733559	0.977235	0.657265	0.871698	0.856374	0.596905	0.99584	0.817346	0.706307	0.868479	0.821499	0.812721	0.801373	0.970558	0.742257	0.711109	0.746459	0.855125	0.844499	0.842751	0.819849
TCGA-B0-5702-01A-11R-1541-07	0.537748	0.790454	0.737182	0.610317	0.667393	0.754743	0.73111	0.924369	0.86307	0.890708	0.314364	0.724938	0.841307	0.889041	0.97887	0.743744	0.529944	0.802431	0.787862	0.673534	0.739648	0.879995	0.629827	0.613352	0.613477	0.786894	0.813757	0.81287	0.677256
TCGA-CJ-4638-01A-02R-1325-07	0.53975	0.723079	0.724996	0.585904	0.651758	0.872389	0.711434	0.878841	0.598857	0.925953	0.503963	0.748527	0.801771	0.592025	0.995044	0.75057	0.62656	0.838155	0.689668	0.710041	0.688653	0.88937	0.624078	0.610162	0.59919	0.755319	0.798974	0.847482	0.737785
TCGA-DV-5573-01A-01R-1541-07	0.693365	0.830374	0.779742	0.719926	0.711916	0.991018	0.795808	0.98617	0.706903	0.980653	0.626714	0.845519	0.813689	0.610247	0.99877	0.793465	0.617098	0.883099	0.772131	0.806594	0.767823	0.977594	0.739179	0.756561	0.715802	0.857616	0.856594	0.857589	0.793185
TCGA-BP-5196-01A-01R-1426-07	0.746168	0.796978	0.799	0.701014	0.702618	0.962717	0.785814	0.95145	0.701502	0.939016	0.535044	0.840324	0.796253	0.622314	0.996074	0.769456	0.586974	0.874169	0.745278	0.771418	0.777695	0.954993	0.687511	0.659855	0.692755	0.829388	0.845075	0.850867	0.837472
TCGA-A3-3351-01A-02R-1325-07	0.708851	0.840875	0.759979	0.689144	0.68896	0.977653	0.785929	0.954133	0.67759	0.975589	0.566624	0.811611	0.794353	0.716102	0.997738	0.815433	0.560042	0.874292	0.740931	0.799495	0.772987	0.987716	0.655026	0.68209	0.658529	0.847787	0.845777	0.87346	0.790034
TCGA-B8-A54D-01A-21R-A266-07	0.545221	0.8087	0.774023	0.678724	0.676953	0.98634	0.782204	0.97812	0.625357	0.984066	0.554273	0.839158	0.825346	0.568141	0.998424	0.808403	0.685188	0.85836	0.778518	0.795953	0.768292	0.978616	0.735333	0.699673	0.71785	0.850868	0.836016	0.828521	0.770452
TCGA-A3-3322-01A-02R-1325-07	0.677306	0.781083	0.765997	0.616422	0.67482	0.729469	0.723694	0.817869	0.686526	0.942599	0.570239	0.710369	0.812657	0.685667	0.991206	0.779984	0.618427	0.846322	0.703379	0.707642	0.672425	0.954443	0.525858	0.59551	0.531852	0.769227	0.815253	0.835549	0.84935
TCGA-B8-A54H-01A-11R-A33J-07	0.564413	0.77888	0.778624	0.671513	0.687153	0.947112	0.759093	0.956726	0.606588	0.958245	0.552941	0.808256	0.763773	0.641563	0.994087	0.775997	0.697901	0.850501	0.7249	0.74283	0.743958	0.950119	0.662977	0.638828	0.635212	0.810746	0.833027	0.827546	0.83439
TCGA-A3-A8OW-01A-11R-A37O-07	0.56704	0.81979	0.741637	0.676106	0.675551	0.921739	0.74861	0.939093	0.666783	0.946663	0.56294	0.770857	0.780752	0.726225	0.995396	0.785491	0.640463	0.848567	0.74021	0.744149	0.731404	0.940312	0.662359	0.629612	0.709249	0.79958	0.8273	0.846604	0.826233
TCGA-B0-4701-01A-01R-1277-07	0.597106	0.840419	0.76698	0.708496	0.703739	0.916059	0.780856	0.91041	0.749606	0.951933	0.716664	0.82165	0.835302	0.731582	0.996948	0.806153	0.668801	0.867553	0.752471	0.791737	0.780346	0.959867	0.727027	0.699664	0.687074	0.834033	0.849723	0.838169	0.805396
TCGA-B2-4101-01A-02R-1277-07	0.668642	0.830077	0.778897	0.729471	0.70326	0.917533	0.777852	0.966902	0.716734	0.930737	0.687017	0.839134	0.812509	0.686797	0.996217	0.816917	0.73896	0.86613	0.752622	0.772621	0.780094	0.971934	0.677797	0.658615	0.692852	0.847828	0.849534	0.84218	0.823162
TCGA-A3-3320-01A-02R-1325-07	0.61179	0.787217	0.770241	0.613702	0.670012	0.839017	0.742883	0.872548	0.664544	0.917493	0.590698	0.752566	0.823109	0.744886	0.993118	0.802006	0.633941	0.849682	0.696138	0.714727	0.702697	0.954796	0.572869	0.607605	0.601948	0.788118	0.821545	0.823681	0.821201
TCGA-BP-4999-01A-01R-1334-07	0.644666	0.79312	0.744043	0.655045	0.672564	0.767577	0.725067	0.872323	0.663239	0.913179	0.510182	0.744485	0.775695	0.77054	0.992233	0.790952	0.648991	0.846723	0.696507	0.696112	0.692862	0.965625	0.526265	0.574191	0.576043	0.775639	0.822865	0.8106	0.841073
TCGA-BP-4161-01A-02R-1325-07	0.727776	0.847381	0.815789	0.724061	0.711781	0.951809	0.80215	0.964974	0.704053	0.95957	0.603329	0.853428	0.866175	0.623534	0.996198	0.805811	0.684818	0.879007	0.780856	0.803	0.807394	0.979796	0.714107	0.749664	0.688389	0.853787	0.857235	0.846118	0.818635
TCGA-B8-4143-01A-01R-1188-07	0.699964	0.855982	0.786461	0.689791	0.697624	0.974646	0.798221	0.975586	0.662854	0.952634	0.44882	0.874312	0.826305	0.665608	0.9986	0.775934	0.628779	0.892733	0.773528	0.820324	0.78638	0.969949	0.793589	0.740371	0.715571	0.852124	0.857877	0.890642	0.759707
TCGA-B0-5701-01A-11R-1541-07	0.575821	0.798162	0.795996	0.680569	0.681574	0.871328	0.77954	0.916662	0.675696	0.960143	0.670854	0.802374	0.83852	0.578532	0.997725	0.799824	0.687469	0.866666	0.760262	0.768771	0.756159	0.950335	0.702597	0.685459	0.687579	0.807836	0.855228	0.786559	0.842457
TCGA-BP-4797-01A-01R-1305-07	0.740256	0.823611	0.804163	0.706654	0.710685	0.92054	0.785063	0.927521	0.717002	0.958238	0.630936	0.822092	0.847389	0.70701	0.995135	0.829834	0.69395	0.879311	0.782035	0.780176	0.770006	0.974371	0.701881	0.697124	0.694023	0.831251	0.854759	0.824626	0.850636
TCGA-DV-A4W0-05A-11R-A266-07	0.552854	0.776927	0.653393	0.633497	0.635703	0.68798	0.670126	0.793459	0.54896	0.883855	0.391556	0.690716	0.775165	0.642362	0.99105	0.752966	0.62556	0.836759	0.663999	0.625527	0.600748	0.854072	0.460365	0.544472	0.612162	0.711464	0.815051	0.85055	0.784655
TCGA-BP-4174-01A-02R-1289-07	0.733797	0.865026	0.779424	0.692514	0.691797	0.911048	0.765567	0.906067	0.67368	0.966819	0.554535	0.790109	0.85813	0.628139	0.995852	0.815359	0.633534	0.848972	0.767084	0.775842	0.74512	0.966156	0.648863	0.651015	0.694826	0.812773	0.844373	0.826323	0.819843
TCGA-A3-3385-01A-02R-1420-07	0.51822	0.781022	0.746412	0.604288	0.642888	0.711663	0.695092	0.787582	0.643958	0.915641	0.831855	0.67968	0.779055	0.731417	0.990032	0.78238	0.571634	0.820917	0.674895	0.651009	0.60645	0.919479	0.487399	0.500328	0.497392	0.723212	0.796531	0.804285	0.802272
TCGA-CZ-5469-01A-01R-1503-07	0.583616	0.759542	0.770618	0.655299	0.672435	0.823118	0.739245	0.864522	0.710375	0.926295	0.614563	0.742942	0.846652	0.621419	0.984928	0.756074	0.559239	0.844435	0.713915	0.710706	0.724319	0.92909	0.666466	0.622163	0.617927	0.766959	0.817801	0.776613	0.833732
TCGA-BP-4970-01A-01R-1334-07	0.589663	0.873094	0.792911	0.712199	0.713087	0.930721	0.780242	0.959831	0.747088	0.974352	0.729294	0.82838	0.814835	0.726459	0.997229	0.816829	0.674666	0.882835	0.746844	0.783532	0.745749	0.982351	0.654028	0.717472	0.671176	0.838673	0.854542	0.832876	0.859979
TCGA-BP-4330-01A-01R-1289-07	0.691949	0.848331	0.779928	0.760344	0.703955	0.976867	0.803833	0.974803	0.722339	0.96786	0.576729	0.868608	0.810808	0.733654	0.996497	0.813981	0.623442	0.860489	0.778687	0.812557	0.798029	0.982665	0.742587	0.70318	0.732487	0.873059	0.84743	0.851393	0.812633
TCGA-BP-4349-01A-01R-1289-07	0.553452	0.783875	0.746643	0.680436	0.674805	0.794384	0.734465	0.911666	0.654103	0.920635	0.480369	0.772162	0.782881	0.660592	0.990642	0.755016	0.603464	0.84035	0.704348	0.705972	0.705024	0.948311	0.542471	0.599402	0.608246	0.786707	0.818781	0.827018	0.831781
TCGA-AK-3461-01A-02R-1277-07	0.571177	0.787505	0.749057	0.66296	0.694378	0.834517	0.747839	0.94149	0.689531	0.941051	0.61629	0.823266	0.767097	0.715949	0.996628	0.814451	0.709731	0.859076	0.69985	0.730513	0.734367	0.94894	0.652006	0.667801	0.67134	0.804154	0.845463	0.825918	0.835553
TCGA-A3-3383-01A-02R-1325-07	0.710716	0.819986	0.773777	0.677026	0.697432	0.867987	0.784842	0.953056	0.783078	0.96882	0.787095	0.836882	0.806506	0.710701	0.995527	0.785008	0.690184	0.861078	0.808559	0.765409	0.76824	0.959159	0.706279	0.725789	0.681874	0.823996	0.831521	0.873303	0.760216
TCGA-BP-4159-01A-02R-1289-07	0.57403	0.789211	0.764828	0.684822	0.68839	0.805154	0.757474	0.9577	0.664262	0.940555	0.585098	0.7647	0.803932	0.721859	0.988782	0.75581	0.753977	0.864295	0.742095	0.72482	0.721006	0.950315	0.510852	0.640692	0.687575	0.796327	0.827362	0.85524	0.863267
TCGA-B2-5635-01B-04R-A277-07	0.510453	0.754371	0.71166	0.563015	0.616928	0.929149	0.701673	0.879574	0.388391	0.944994	0.327363	0.723194	0.742117	0.51339	0.992888	0.760395	0.610603	0.83074	0.611913	0.726363	0.665832	0.953598	0.559038	0.617327	0.596661	0.784324	0.803562	0.815841	0.780107
TCGA-CJ-4889-01A-01R-1305-07	0.624547	0.837577	0.787084	0.851951	0.721286	0.924432	0.783914	0.954195	0.759752	0.965046	0.651275	0.850991	0.843358	0.768283	0.994789	0.811075	0.646581	0.896913	0.77205	0.77703	0.788016	0.977477	0.805204	0.68615	0.656339	0.875451	0.853567	0.859235	0.856674
TCGA-BP-4962-01A-01R-1334-07	0.594036	0.843273	0.795335	0.726148	0.705367	0.956074	0.786622	0.962586	0.765764	0.951501	0.717173	0.827392	0.856817	0.679842	0.993702	0.785997	0.728575	0.881423	0.786001	0.792933	0.764209	0.975492	0.717443	0.705317	0.752627	0.843032	0.846745	0.84204	0.827679
TCGA-CJ-5682-01A-11R-1541-07	0.557245	0.784975	0.772702	0.68162	0.700833	0.881017	0.762815	0.946559	0.703997	0.940151	0.620917	0.808785	0.744156	0.665871	0.991285	0.782396	0.739436	0.869836	0.754453	0.732066	0.737911	0.931821	0.624341	0.665702	0.654576	0.799066	0.831702	0.824994	0.83135
TCGA-BP-4347-01A-01R-1289-07	0.589721	0.808994	0.760144	0.64194	0.674928	0.844579	0.744431	0.9012	0.62181	0.926286	0.557296	0.786175	0.781256	0.693387	0.996843	0.770771	0.603911	0.844775	0.721434	0.748195	0.711988	0.937187	0.573858	0.670305	0.632245	0.787209	0.833023	0.828006	0.819838
TCGA-BP-5186-01A-01R-1426-07	0.579726	0.809459	0.765311	0.684307	0.691028	0.881371	0.748527	0.916902	0.725133	0.936673	0.601806	0.796732	0.792357	0.83374	0.994432	0.770039	0.642152	0.848604	0.730737	0.727809	0.72099	0.942493	0.554232	0.633442	0.632353	0.800005	0.826235	0.819219	0.813853
TCGA-CZ-4856-01A-02R-1426-07	0.574814	0.819173	0.78584	0.711782	0.703802	0.909043	0.776622	0.945668	0.71587	0.96189	0.65948	0.803121	0.813404	0.697121	0.995429	0.777544	0.733108	0.862063	0.755793	0.751474	0.767107	0.971345	0.692771	0.680238	0.728178	0.82969	0.847001	0.824898	0.854169
TCGA-B0-4824-01A-01R-1277-07	0.598879	0.852148	0.761739	0.63726	0.692511	0.969654	0.782615	0.976498	0.694031	0.966487	0.564563	0.840047	0.787896	0.73837	0.997542	0.78508	0.677677	0.862166	0.744565	0.787188	0.764996	0.974096	0.687967	0.678198	0.695461	0.834932	0.835119	0.848642	0.809084
TCGA-A3-3376-01A-02R-1420-07	0.548858	0.812033	0.731446	0.67982	0.682938	0.802108	0.736668	0.906624	0.712171	0.936805	0.572131	0.749541	0.811633	0.738307	0.990228	0.833357	0.675271	0.855759	0.728873	0.715945	0.721847	0.977594	0.516037	0.605163	0.594738	0.815752	0.832439	0.844555	0.887094
TCGA-CJ-4635-01A-02R-1305-07	0.630054	0.800928	0.775305	0.634887	0.691157	0.977575	0.777771	0.960397	0.58727	0.955221	0.567205	0.818953	0.858657	0.629743	0.994288	0.77187	0.588215	0.858311	0.767317	0.767501	0.768914	0.967198	0.692832	0.656131	0.683099	0.833742	0.846549	0.825975	0.885079
TCGA-BP-5183-01A-01R-1426-07	0.711941	0.810385	0.763642	0.633783	0.688867	0.941923	0.773135	0.958578	0.58609	0.971396	0.491654	0.83167	0.80775	0.619265	0.997633	0.783139	0.628605	0.863394	0.764626	0.774302	0.779709	0.967375	0.656591	0.661734	0.672983	0.823726	0.839703	0.837408	0.821296
TCGA-A3-A8OV-01A-11R-A37O-07	0.531767	0.785917	0.742894	0.633091	0.662718	0.755372	0.716427	0.912688	0.635653	0.947356	0.529397	0.753861	0.795012	0.676469	0.993925	0.78383	0.690246	0.838207	0.734896	0.69469	0.657584	0.933846	0.38853	0.661704	0.553171	0.77518	0.812047	0.840658	0.839922
TCGA-B8-5159-01A-01R-1420-07	0.555355	0.806817	0.764667	0.685087	0.679022	0.951652	0.766498	0.934442	0.661981	0.952375	0.540972	0.784526	0.812769	0.737659	0.996381	0.812947	0.671257	0.855996	0.753041	0.770774	0.719101	0.95517	0.597611	0.67998	0.658355	0.802544	0.839314	0.843902	0.799401
TCGA-B8-5163-01A-01R-1420-07	0.777555	0.878314	0.831553	0.715843	0.725279	0.954246	0.806329	0.960981	0.789581	0.966422	0.49991	0.852949	0.836657	0.670384	0.996165	0.81836	0.701049	0.904732	0.776498	0.808299	0.808274	0.988384	0.757524	0.738167	0.747491	0.867802	0.87384	0.896283	0.835292
TCGA-CZ-5461-01A-01R-1503-07	0.625076	0.815812	0.808982	0.701574	0.71448	0.825889	0.782483	0.896862	0.722286	0.95211	0.638575	0.803775	0.815841	0.732831	0.994183	0.808897	0.674248	0.876793	0.797723	0.771045	0.768178	0.963385	0.66413	0.67767	0.685222	0.8234	0.85202	0.850593	0.848231
TCGA-GK-A6C7-01A-11R-A33J-07	0.591996	0.776547	0.724064	0.674419	0.680464	0.830488	0.735696	0.930133	0.700987	0.949719	0.617828	0.794177	0.783654	0.656287	0.99582	0.786117	0.705621	0.851066	0.760192	0.719381	0.738477	0.9376	0.588092	0.622559	0.610076	0.795226	0.826214	0.834964	0.847994
TCGA-BP-4771-01A-01R-1289-07	0.685449	0.855472	0.797901	0.728617	0.711682	0.995125	0.825494	0.992907	0.716441	0.969187	0.558279	0.879934	0.820642	0.715618	0.999535	0.813309	0.707218	0.882588	0.785306	0.849042	0.845263	0.990802	0.796321	0.777133	0.749177	0.889407	0.860893	0.863023	0.839255
TCGA-BP-4803-01A-01R-1305-07	0.617169	0.770145	0.778579	0.662946	0.689355	0.840354	0.751546	0.906056	0.649859	0.94503	0.704427	0.770956	0.84881	0.686722	0.987129	0.772177	0.670802	0.857313	0.745964	0.720102	0.731368	0.959061	0.588259	0.606681	0.620393	0.793909	0.830303	0.805224	0.877015
TCGA-B2-5639-01A-01R-1541-07	0.614343	0.81359	0.793279	0.705509	0.70782	0.8094	0.771656	0.874825	0.728097	0.960437	0.701184	0.791347	0.8375	0.624798	0.996505	0.83122	0.708309	0.870472	0.793532	0.771263	0.755216	0.968397	0.652493	0.726832	0.674885	0.820943	0.845647	0.834405	0.801357
TCGA-CZ-5455-01A-01R-1503-07	0.73609	0.884145	0.798336	0.724929	0.709589	0.977457	0.805032	0.972016	0.698918	0.970331	0.594119	0.857742	0.853383	0.639439	0.999352	0.835507	0.746579	0.877412	0.790408	0.816248	0.779656	0.977693	0.725604	0.767385	0.70619	0.84867	0.861868	0.8596	0.804628
TCGA-CJ-4897-01A-03R-1426-07	0.691418	0.801648	0.755889	0.683747	0.67717	0.854681	0.738818	0.906238	0.669447	0.942774	0.529556	0.790166	0.805221	0.737437	0.991155	0.768447	0.620507	0.857502	0.74101	0.711085	0.712801	0.947269	0.581986	0.609732	0.63353	0.794062	0.830626	0.812892	0.838578
TCGA-B0-5107-01A-01R-1420-07	0.690131	0.804707	0.805413	0.676569	0.687744	0.964034	0.784842	0.934971	0.675865	0.962897	0.530378	0.802753	0.778392	0.368585	0.997254	0.768752	0.577555	0.84074	0.757506	0.786426	0.785222	0.96991	0.758643	0.720675	0.712994	0.820122	0.821168	0.824339	0.691575
TCGA-BP-4759-01A-01R-1289-07	0.719618	0.820355	0.776104	0.646937	0.68277	0.887424	0.757684	0.940662	0.690927	0.920532	0.648069	0.791529	0.814755	0.645946	0.990861	0.777044	0.728434	0.867502	0.751908	0.726638	0.722051	0.947131	0.619714	0.653329	0.628962	0.796349	0.827273	0.848699	0.835892
TCGA-B0-4836-01A-01R-1305-07	0.693901	0.804654	0.79193	0.73243	0.71811	0.952458	0.784481	0.949995	0.749212	0.958676	0.710361	0.832552	0.845869	0.71791	0.990823	0.771581	0.67903	0.888258	0.751837	0.779665	0.788204	0.960103	0.762047	0.69979	0.755457	0.841731	0.852986	0.842176	0.839044
TCGA-B8-A7U6-01A-12R-A37O-07	0.593694	0.789631	0.780562	0.711328	0.706196	0.784793	0.748845	0.894082	0.687671	0.948143	0.644781	0.772867	0.815079	0.816448	0.992816	0.798595	0.692899	0.854665	0.769042	0.715276	0.723698	0.953598	0.559172	0.606843	0.624354	0.790755	0.822223	0.825259	0.831271
TCGA-B2-5636-01A-02R-1541-07	0.563104	0.786866	0.714059	0.710915	0.685008	0.744032	0.721645	0.830719	0.738488	0.93192	0.614517	0.71833	0.813243	0.808277	0.985139	0.780967	0.647354	0.860241	0.745317	0.681099	0.687557	0.954384	0.574211	0.612987	0.630112	0.780027	0.833264	0.809507	0.876329
TCGA-A3-3382-01A-02R-1325-07	0.568765	0.800368	0.76746	0.63387	0.679805	0.900651	0.755985	0.922197	0.686474	0.950904	0.445167	0.787566	0.818159	0.497396	0.986575	0.77231	0.67369	0.846262	0.735525	0.736377	0.733639	0.964014	0.642099	0.614903	0.683387	0.807277	0.837561	0.818159	0.848919
TCGA-CZ-5464-01A-01R-1503-07	0.620628	0.839237	0.81298	0.708972	0.719694	0.933846	0.806373	0.956292	0.739154	0.969732	0.741979	0.86112	0.831707	0.674564	0.996113	0.802382	0.757201	0.887975	0.800855	0.797201	0.795658	0.977771	0.736403	0.719338	0.690786	0.847881	0.859628	0.843797	0.8389
TCGA-CJ-4634-01A-02R-1325-07	0.555022	0.785384	0.73517	0.646807	0.675772	0.786975	0.716454	0.837259	0.652256	0.922511	0.556814	0.726206	0.828132	0.780991	0.987826	0.788485	0.576151	0.848958	0.724933	0.698302	0.688824	0.954325	0.497259	0.605596	0.542859	0.776711	0.820643	0.834473	0.822825
TCGA-CJ-6028-01A-11R-1672-07	0.818011	0.887936	0.811835	0.740569	0.730253	0.978243	0.812648	0.975282	0.739381	0.951516	0.554202	0.879211	0.864808	0.644939	0.996386	0.817971	0.694492	0.890556	0.783043	0.835554	0.805315	0.979579	0.775883	0.753127	0.726366	0.870964	0.875696	0.8537	0.847844
TCGA-BP-4804-01A-02R-1305-07	0.738001	0.84628	0.796616	0.749556	0.723586	0.968416	0.809223	0.967666	0.75137	0.970583	0.661703	0.864174	0.858897	0.779687	0.996752	0.800231	0.674132	0.886151	0.800028	0.799524	0.80807	0.983746	0.773572	0.713921	0.717986	0.866002	0.856132	0.860652	0.849369
TCGA-CJ-4912-01A-01R-1426-07	0.542378	0.767146	0.73223	0.668716	0.667581	0.805921	0.727273	0.881124	0.549528	0.918148	0.528325	0.738393	0.826442	0.635107	0.98313	0.747668	0.703423	0.835732	0.699142	0.71104	0.703622	0.907667	0.607865	0.649808	0.578769	0.779307	0.819334	0.801759	0.774683
TCGA-CJ-4873-01A-01R-1305-07	0.731852	0.833202	0.790272	0.677782	0.697318	0.933236	0.786858	0.949813	0.698863	0.96501	0.567306	0.837163	0.878903	0.567914	0.992162	0.794076	0.70715	0.877457	0.791564	0.797568	0.800344	0.981977	0.708992	0.692803	0.674471	0.848857	0.830985	0.845994	0.817403
TCGA-CJ-4894-01A-01R-1305-07	0.598445	0.834765	0.79234	0.707475	0.695352	0.980621	0.793987	0.970918	0.681555	0.976546	0.587265	0.856044	0.780378	0.658045	0.998254	0.806577	0.628847	0.862973	0.763466	0.801498	0.767348	0.9807	0.744356	0.685856	0.685055	0.849952	0.850229	0.840847	0.771725
TCGA-CW-5588-01A-01R-1541-07	0.582199	0.810306	0.785609	0.681555	0.70422	0.842673	0.763402	0.882196	0.73389	0.950742	0.593403	0.758446	0.857496	0.696988	0.984489	0.801903	0.691016	0.874267	0.770045	0.746877	0.72814	0.974312	0.572458	0.609188	0.665565	0.814357	0.843931	0.812375	0.853889
TCGA-A3-3325-01A-01R-0864-07	0.571968	0.810567	0.776325	0.684276	0.695267	0.775497	0.755056	0.876178	0.747624	0.924922	0.726555	0.730301	0.789	0.760812	0.989767	0.787232	0.617779	0.854625	0.752692	0.716081	0.729302	0.973959	0.544454	0.615773	0.638359	0.804545	0.830712	0.827903	0.841368
TCGA-CJ-4871-01A-01R-1305-07	0.590318	0.808996	0.779116	0.665962	0.705401	0.853679	0.765136	0.917625	0.693875	0.955839	0.530497	0.780877	0.793624	0.647588	0.990337	0.786811	0.675652	0.869508	0.756307	0.732133	0.746762	0.952733	0.567482	0.634774	0.674752	0.794306	0.842731	0.817827	0.830334
TCGA-CJ-4640-01A-02R-1325-07	0.629167	0.857337	0.799626	0.697247	0.709202	0.964191	0.80257	0.962523	0.74139	0.97594	0.678592	0.839865	0.831843	0.698915	0.998679	0.80648	0.744725	0.885451	0.793218	0.806327	0.786217	0.976396	0.594714	0.708875	0.714524	0.846081	0.854303	0.837525	0.836902
TCGA-BP-4762-01A-02R-1289-07	0.59609	0.821396	0.765652	0.761576	0.717159	0.876045	0.767705	0.916704	0.782728	0.95136	0.687372	0.797296	0.835536	0.823258	0.989144	0.807187	0.703663	0.875403	0.772425	0.749323	0.758263	0.974823	0.684924	0.671041	0.727897	0.836776	0.849361	0.839236	0.878201
TCGA-B0-5094-01A-01R-1420-07	0.551847	0.742949	0.723934	0.609095	0.670519	0.851733	0.718311	0.901821	0.614236	0.925536	0.659181	0.775164	0.81303	0.665786	0.989651	0.748351	0.727994	0.846603	0.669974	0.721103	0.70354	0.931703	0.646625	0.629404	0.604851	0.774712	0.818141	0.818019	0.856145
TCGA-CZ-5467-01A-01R-1503-07	0.57348	0.79152	0.761376	0.674239	0.683793	0.795681	0.738554	0.8656	0.677043	0.946489	0.503891	0.76849	0.814969	0.686098	0.990341	0.765623	0.658748	0.859533	0.725996	0.707601	0.706222	0.929856	0.621822	0.591784	0.653347	0.7869	0.836715	0.829612	0.857848
TCGA-A3-3363-01A-01R-0864-07	0.562717	0.780774	0.742349	0.589491	0.674778	0.776677	0.711443	0.835111	0.610379	0.940342	0.523827	0.68045	0.853001	0.838262	0.989565	0.783261	0.5532	0.833226	0.725107	0.690557	0.661191	0.960181	0.416861	0.593411	0.576489	0.760241	0.810015	0.807016	0.776965
TCGA-CZ-5468-01A-01R-1503-07	0.597601	0.857491	0.783281	0.584935	0.683421	0.859536	0.761072	0.933974	0.659641	0.950664	0.480674	0.79993	0.853549	0.468403	0.994288	0.739192	0.724882	0.864868	0.727714	0.748958	0.748762	0.948468	0.632879	0.66637	0.751451	0.791842	0.838567	0.826596	0.732917
TCGA-B2-3924-01B-03R-A277-07	0.478779	0.786776	0.669911	0.562966	0.610676	0.939801	0.688285	0.91461	0.490939	0.947632	0.165782	0.730778	0.729336	0.59969	0.997522	0.731779	0.559272	0.803609	0.618241	0.728312	0.644955	0.942788	0.565768	0.599667	0.573397	0.772487	0.793955	0.817679	0.752083
TCGA-BP-5181-01A-01R-1426-07	0.588694	0.814019	0.762612	0.683152	0.692189	0.825791	0.753477	0.925344	0.725349	0.936505	0.663441	0.776361	0.799382	0.740504	0.991766	0.788426	0.655405	0.871467	0.74758	0.736676	0.721765	0.960142	0.518378	0.62217	0.601978	0.799382	0.834244	0.859917	0.821331
TCGA-B8-5553-01A-01R-1541-07	0.590307	0.832812	0.788165	0.723277	0.707386	0.938857	0.783848	0.954127	0.71501	0.970169	0.60654	0.831163	0.825262	0.696008	0.997758	0.826179	0.684663	0.862907	0.777947	0.784401	0.754117	0.977791	0.69995	0.687721	0.674351	0.831188	0.851867	0.828587	0.846269
TCGA-BP-4761-01A-01R-1289-07	0.576325	0.813591	0.756838	0.69133	0.696852	0.919754	0.773219	0.910587	0.735367	0.942639	0.631959	0.834323	0.81944	0.704048	0.98912	0.714427	0.600158	0.869682	0.73084	0.766253	0.779318	0.956211	0.730052	0.666918	0.709622	0.814593	0.826062	0.864332	0.72199
TCGA-B2-5633-01A-01R-A277-07	0.577826	0.75741	0.76164	0.66933	0.669676	0.808928	0.739121	0.911885	0.603007	0.943581	0.721875	0.767114	0.808875	0.663539	0.990259	0.776998	0.705416	0.849866	0.737999	0.727728	0.695944	0.933688	0.5055	0.62314	0.63305	0.802462	0.847246	0.824311	0.81331
TCGA-A3-3358-01A-01R-1541-07	0.60715	0.840269	0.799098	0.731157	0.710276	0.935477	0.789733	0.944627	0.768253	0.957657	0.718761	0.836398	0.858573	0.791231	0.995031	0.803027	0.696019	0.873791	0.782183	0.787765	0.775294	0.975275	0.684083	0.671789	0.666251	0.850198	0.847707	0.829052	0.835448
TCGA-CZ-4864-01A-01R-1503-07	0.600337	0.865342	0.783501	0.691013	0.69072	0.972091	0.788732	0.96384	0.644368	0.983604	0.563314	0.837535	0.8083	0.68419	0.999791	0.810432	0.637916	0.868452	0.770332	0.806145	0.768207	0.983451	0.705654	0.686936	0.682853	0.84785	0.851955	0.852768	0.795009
TCGA-AK-3436-01A-02R-1325-07	0.691452	0.768316	0.744749	0.658247	0.668896	0.872684	0.732156	0.89315	0.541445	0.934265	0.540457	0.764577	0.83163	0.684541	0.983681	0.707147	0.702386	0.841513	0.731533	0.691338	0.716633	0.946621	0.65975	0.602219	0.687637	0.784238	0.824897	0.801562	0.846106
TCGA-CZ-5466-01A-01R-1503-07	0.76828	0.833504	0.791811	0.765439	0.715096	0.933964	0.796659	0.95703	0.761063	0.947136	0.756685	0.846167	0.886832	0.713164	0.992986	0.808643	0.709017	0.880317	0.821547	0.793343	0.78012	0.979186	0.7447	0.693787	0.714541	0.853993	0.844755	0.807197	0.83214
TCGA-B0-5080-01A-01R-1503-07	0.71334	0.799781	0.789221	0.791519	0.720366	0.925768	0.770848	0.921833	0.775111	0.936746	0.568078	0.820507	0.816235	0.743395	0.992232	0.804919	0.603315	0.876177	0.743964	0.72372	0.78436	0.961931	0.70904	0.679644	0.676807	0.852641	0.85336	0.816808	0.882244
TCGA-CZ-4861-01A-01R-1305-07	0.773651	0.88232	0.834812	0.658335	0.72643	0.903815	0.804207	0.909343	0.754592	0.945574	0.630163	0.8115	0.881995	0.659814	0.996008	0.829758	0.659884	0.888557	0.759039	0.803698	0.781156	0.990212	0.69884	0.725809	0.720331	0.838861	0.858011	0.858206	0.82368
TCGA-CJ-5671-01A-11R-1541-07	0.757942	0.854794	0.814998	0.750379	0.729041	0.904798	0.797615	0.949776	0.750557	0.953665	0.668903	0.833964	0.895422	0.749706	0.992244	0.802305	0.705138	0.882917	0.829354	0.780656	0.795902	0.985318	0.678169	0.688663	0.719506	0.857425	0.858767	0.841838	0.885859
TCGA-AK-3431-01A-02R-1277-07	0.558374	0.789943	0.750084	0.701811	0.705858	0.831372	0.754753	0.930592	0.692252	0.9317	0.604559	0.766546	0.787509	0.677628	0.989365	0.804405	0.65576	0.870533	0.771006	0.719004	0.738231	0.951278	0.628239	0.626812	0.722489	0.806543	0.841498	0.815292	0.866163
TCGA-B0-4811-01A-01R-1503-07	0.679709	0.744972	0.746798	0.621196	0.6773	0.766457	0.738264	0.886888	0.671227	0.943531	0.673923	0.792883	0.773114	0.637534	0.99359	0.734464	0.591481	0.852035	0.71045	0.711024	0.721821	0.922879	0.559283	0.609669	0.605694	0.768572	0.802442	0.8226	0.774053
TCGA-A3-3313-01A-02R-1325-07	0.752681	0.814479	0.718839	0.601094	0.646622	0.683597	0.677102	0.770198	0.558587	0.897558	0.504199	0.660921	0.82871	0.617526	0.974686	0.764712	0.528865	0.829074	0.694656	0.674996	0.631759	0.919263	0.469652	0.552427	0.574787	0.729381	0.809015	0.76998	0.768863
TCGA-B8-5552-01B-11R-1672-07	0.595229	0.83355	0.786332	0.77175	0.719799	0.889507	0.781288	0.91755	0.751176	0.950947	0.655343	0.803923	0.870207	0.779338	0.992662	0.816399	0.646151	0.891939	0.762008	0.768826	0.760662	0.981663	0.665478	0.660646	0.637701	0.840043	0.850094	0.849199	0.874099
TCGA-CJ-6027-01A-11R-1672-07	0.771449	0.872821	0.814829	0.71094	0.720892	0.972917	0.815815	0.98309	0.74014	0.936321	0.661857	0.880806	0.868634	0.619283	0.996686	0.794301	0.776642	0.901922	0.799622	0.837029	0.803332	0.977791	0.781798	0.773983	0.736268	0.862162	0.85859	0.901036	0.765003
TCGA-BP-4756-01A-01R-1289-07	0.582991	0.817239	0.716008	0.654106	0.662083	0.870404	0.720608	0.859205	0.599289	0.930123	0.643639	0.758342	0.863261	0.532708	0.990311	0.751372	0.560157	0.825839	0.71668	0.738161	0.688854	0.937305	0.639244	0.614976	0.629121	0.774538	0.818622	0.765882	0.739763
TCGA-A3-3319-01A-02R-1325-07	0.710165	0.775462	0.770913	0.648476	0.686039	0.857551	0.746457	0.866713	0.630545	0.950226	0.456737	0.766824	0.834392	0.487349	0.989063	0.770559	0.67905	0.87176	0.716652	0.732693	0.73047	0.962874	0.63238	0.673051	0.661927	0.79738	0.836948	0.841285	0.76133
TCGA-MW-A4EC-01A-11R-A266-07	0.691898	0.798615	0.768663	0.657737	0.685226	0.792969	0.726902	0.871767	0.712015	0.955924	0.606309	0.774159	0.786861	0.760051	0.991728	0.761801	0.658888	0.839009	0.729944	0.704461	0.691212	0.902695	0.529831	0.633362	0.602426	0.781696	0.821748	0.82164	0.804034
TCGA-B0-4816-01A-01R-1503-07	0.593588	0.797307	0.755781	0.636766	0.69033	0.857413	0.752768	0.93239	0.629808	0.959632	0.520145	0.774717	0.810707	0.621634	0.989767	0.832258	0.684349	0.872336	0.742551	0.739023	0.733876	0.978381	0.552796	0.637475	0.589219	0.814598	0.837452	0.845775	0.840985
TCGA-CZ-4863-01A-01R-1503-07	0.720983	0.835328	0.813375	0.724832	0.698983	0.985456	0.803916	0.97366	0.670697	0.97444	0.598873	0.857808	0.795778	0.63892	0.999078	0.814929	0.647825	0.86756	0.786397	0.806197	0.783714	0.972091	0.772581	0.707189	0.692063	0.852108	0.850389	0.846236	0.800012
TCGA-B0-5110-01A-01R-1420-07	0.71864	0.811112	0.791068	0.685864	0.699422	0.829073	0.758892	0.889751	0.722755	0.924356	0.675127	0.792638	0.811253	0.704555	0.993573	0.803705	0.680817	0.868624	0.728317	0.731766	0.726993	0.962972	0.603663	0.658316	0.619432	0.801486	0.834803	0.826622	0.830981
TCGA-CZ-5986-01A-11R-1672-07	0.615421	0.822424	0.766768	0.668237	0.681559	0.758458	0.741878	0.853073	0.720665	0.938289	0.704886	0.761114	0.82523	0.730524	0.993324	0.795266	0.68302	0.85481	0.739649	0.739187	0.700687	0.960614	0.480036	0.661175	0.662834	0.788731	0.828813	0.83316	0.822299
TCGA-B0-4828-01A-01R-1277-07	0.552625	0.748905	0.74776	0.628484	0.673436	0.860401	0.737198	0.928877	0.577531	0.929316	0.55782	0.784917	0.767838	0.578726	0.993813	0.765718	0.629115	0.848883	0.722974	0.707929	0.743107	0.917573	0.586382	0.656742	0.671347	0.787722	0.821297	0.849833	0.786369
TCGA-B8-4151-01A-01R-1188-07	0.558181	0.821033	0.758358	0.616669	0.665108	0.784243	0.747883	0.860079	0.592515	0.930783	0.53016	0.755143	0.760669	0.698938	0.993496	0.781435	0.64393	0.848531	0.753778	0.72601	0.688933	0.932313	0.535981	0.590783	0.643237	0.76404	0.809657	0.866677	0.814192
TCGA-EU-5905-01A-11R-1672-07	0.561651	0.794175	0.759656	0.61505	0.669719	0.800634	0.732913	0.880527	0.698988	0.956926	0.53383	0.768486	0.798694	0.664791	0.988895	0.766309	0.717207	0.86487	0.735067	0.711571	0.701068	0.958177	0.564191	0.599018	0.65395	0.789544	0.84279	0.827812	0.855297
TCGA-CJ-4903-01A-01R-1426-07	0.709217	0.814139	0.789539	0.677887	0.696048	0.926633	0.767564	0.940733	0.705814	0.938282	0.608714	0.803951	0.816841	0.705751	0.994542	0.790153	0.629269	0.865258	0.740698	0.771523	0.736234	0.968121	0.684135	0.65932	0.666565	0.826355	0.832273	0.823038	0.827979
TCGA-B0-5698-01A-11R-1672-07	0.649803	0.821274	0.791067	0.68764	0.714653	0.897074	0.78843	0.906884	0.689195	0.970452	0.606944	0.817283	0.836173	0.631263	0.995813	0.842064	0.633406	0.858126	0.769082	0.77782	0.792776	0.969772	0.716791	0.727502	0.712054	0.833506	0.854713	0.829388	0.823336
TCGA-B0-4815-01A-01R-1503-07	0.728955	0.863934	0.79216	0.802289	0.720588	0.982154	0.80593	0.97933	0.703383	0.910912	0.59658	0.888313	0.833783	0.653213	0.9979	0.794673	0.660563	0.885331	0.783089	0.839596	0.811401	0.980759	0.813978	0.769181	0.723743	0.892378	0.855672	0.836971	0.79207
TCGA-B0-5081-01A-01R-1334-07	0.74449	0.851505	0.812099	0.757981	0.729039	0.962147	0.81957	0.970068	0.752739	0.952832	0.618162	0.872006	0.822844	0.69838	0.99651	0.809846	0.682057	0.885427	0.809183	0.829791	0.85109	0.987421	0.800343	0.745238	0.697774	0.887184	0.86495	0.842331	0.837671
TCGA-A3-3352-01A-01R-0864-07	0.710681	0.826616	0.770212	0.686507	0.68594	0.783496	0.762194	0.938884	0.685063	0.940508	0.59964	0.803493	0.831333	0.667986	0.993508	0.794287	0.724844	0.855091	0.765787	0.743651	0.726273	0.966136	0.586331	0.65059	0.629273	0.808569	0.83477	0.858639	0.83106
TCGA-A3-A6NJ-01A-12R-A33J-07	0.689735	0.85752	0.770504	0.714491	0.705714	0.972642	0.792231	0.978251	0.738083	0.96554	0.574906	0.851134	0.771121	0.70743	0.998594	0.810947	0.695656	0.862006	0.76423	0.812281	0.784679	0.968868	0.691476	0.688919	0.722801	0.851085	0.846526	0.847413	0.854268
TCGA-BP-5184-01A-01R-1426-07	0.600903	0.818757	0.757613	0.731103	0.698857	0.886422	0.75656	0.939466	0.796682	0.947591	0.601577	0.783595	0.821371	0.755046	0.988	0.788327	0.679479	0.866586	0.725712	0.750509	0.732033	0.966097	0.588531	0.65702	0.607324	0.821158	0.827202	0.822168	0.827257
TCGA-CJ-4899-01A-01R-1334-07	0.556943	0.826473	0.757268	0.699963	0.689462	0.83774	0.74461	0.884988	0.719731	0.900456	0.600312	0.763474	0.844086	0.792692	0.989469	0.780324	0.650334	0.869671	0.741406	0.716046	0.719038	0.970991	0.564024	0.634829	0.612315	0.810867	0.835074	0.839069	0.853566
TCGA-CJ-4881-01A-01R-1305-07	0.746939	0.775426	0.798294	0.687998	0.707397	0.899609	0.773226	0.923981	0.653741	0.956001	0.638224	0.796466	0.829466	0.643116	0.985621	0.796993	0.644301	0.876273	0.75603	0.744187	0.784682	0.969497	0.64402	0.682425	0.681337	0.832731	0.836665	0.85238	0.800237
TCGA-CJ-4878-01A-01R-1305-07	0.547691	0.787825	0.711952	0.605139	0.652356	0.666578	0.690782	0.805048	0.609916	0.928682	0.569525	0.688824	0.745371	0.665064	0.992851	0.760337	0.551629	0.834961	0.703772	0.631664	0.636846	0.88198	0.384774	0.563818	0.620801	0.729382	0.818173	0.839844	0.804177
TCGA-B0-4819-01A-01R-1277-07	0.76757	0.864111	0.818473	0.782958	0.738394	0.989367	0.834343	0.98524	0.761047	0.968363	0.604685	0.896669	0.876314	0.549464	0.997633	0.837305	0.721803	0.893393	0.809591	0.862645	0.855443	0.974234	0.793868	0.787415	0.786791	0.901269	0.863857	0.842824	0.854004
TCGA-B0-4710-01A-01R-1503-07	0.557795	0.775009	0.759881	0.719091	0.672836	0.8752	0.744735	0.928638	0.644096	0.920535	0.492411	0.770853	0.807562	0.621753	0.989385	0.810188	0.622926	0.847404	0.752017	0.72285	0.714514	0.925925	0.618714	0.608627	0.584161	0.804916	0.82545	0.834693	0.806117
TCGA-A3-3331-01A-02R-1325-07	0.713381	0.798179	0.803755	0.66871	0.701653	0.876084	0.769322	0.909942	0.735064	0.942701	0.569873	0.779152	0.813837	0.60567	0.994542	0.821806	0.63923	0.861455	0.754283	0.757019	0.74033	0.970912	0.5925	0.656104	0.629849	0.809268	0.836801	0.823745	0.836342
TCGA-BP-5174-01A-01R-1426-07	0.55753	0.785591	0.765793	0.642673	0.676557	0.870778	0.742164	0.886525	0.654793	0.925658	0.514419	0.770046	0.825667	0.735936	0.993651	0.775423	0.583199	0.842838	0.736069	0.717246	0.709727	0.93699	0.601066	0.607402	0.574791	0.776846	0.815876	0.818006	0.792798
TCGA-B0-5694-01A-11R-1541-07	0.610022	0.768713	0.773728	0.663739	0.695244	0.753348	0.758264	0.941073	0.70223	0.943098	0.673066	0.771627	0.82276	0.674252	0.984616	0.7893	0.725648	0.854481	0.72451	0.712368	0.714336	0.953755	0.543971	0.6492	0.681809	0.79232	0.826654	0.832771	0.869487
TCGA-B0-5116-01A-02R-1420-07	0.577341	0.766569	0.80003	0.662711	0.683045	0.817752	0.743697	0.872127	0.649599	0.912863	0.5164	0.759816	0.814005	0.687535	0.985767	0.71417	0.612057	0.858492	0.728259	0.682838	0.709327	0.886284	0.638086	0.623518	0.666815	0.764522	0.829152	0.829107	0.847534
TCGA-DV-5567-01A-01R-1541-07	0.567342	0.771776	0.679693	0.57551	0.649106	0.713982	0.686104	0.789359	0.618114	0.897329	0.315519	0.686801	0.817745	0.685828	0.980574	0.750725	0.546191	0.843522	0.684429	0.623977	0.621684	0.879091	0.464061	0.51219	0.625321	0.715437	0.817474	0.822495	0.820958
TCGA-BP-5169-01A-01R-1426-07	0.731579	0.793339	0.757118	0.769272	0.711757	0.914664	0.780268	0.955509	0.761645	0.947592	0.679323	0.849743	0.848689	0.615951	0.987057	0.775152	0.68875	0.871137	0.76951	0.777017	0.812605	0.96932	0.774608	0.701802	0.701275	0.865858	0.841078	0.787566	0.77626
TCGA-B0-4700-01A-02R-1541-07	0.738216	0.878371	0.822441	0.752284	0.73894	0.980425	0.825497	0.979534	0.771183	0.955973	0.660124	0.882811	0.875594	0.655212	0.99683	0.794267	0.709719	0.902212	0.804509	0.836802	0.820551	0.978164	0.789198	0.777843	0.751764	0.875355	0.863982	0.876293	0.831182
TCGA-AK-3433-01A-02R-1277-07	0.560537	0.758852	0.651111	0.641452	0.618661	0.698298	0.653669	0.817955	0.537095	0.883757	0.47351	0.694499	0.737678	0.533647	0.969705	0.704617	0.672744	0.823677	0.682507	0.648381	0.615923	0.875396	0.487536	0.535052	0.619667	0.712945	0.806475	0.741903	0.802643
TCGA-CJ-4875-01A-01R-1305-07	0.580797	0.771568	0.768899	0.642323	0.683497	0.978479	0.774298	0.977606	0.609752	0.95537	0.471676	0.83171	0.792695	0.656732	0.994406	0.761767	0.674707	0.839865	0.776208	0.767244	0.770491	0.936519	0.723124	0.685233	0.71787	0.818969	0.818424	0.831047	0.7966
TCGA-A3-3335-01A-01R-0864-07	0.610486	0.833507	0.770128	0.694275	0.687026	0.800949	0.741245	0.826648	0.697146	0.91918	0.582339	0.764139	0.818113	0.608988	0.986359	0.795265	0.544821	0.858391	0.704693	0.737283	0.728171	0.94438	0.619209	0.660038	0.60996	0.7797	0.830857	0.833677	0.800288
TCGA-B0-5115-01A-01R-1420-07	0.642886	0.828143	0.729339	0.652946	0.690051	0.803484	0.74746	0.906227	0.702365	0.952491	0.609044	0.790843	0.806128	0.680968	0.99464	0.791363	0.63092	0.863408	0.709089	0.73895	0.744581	0.961459	0.551225	0.666012	0.615122	0.802992	0.833694	0.846672	0.828644
TCGA-BP-5195-01A-02R-1426-07	0.613326	0.799383	0.791848	0.678506	0.696839	0.834458	0.758245	0.913106	0.673635	0.931661	0.542329	0.785242	0.842717	0.66198	0.992311	0.803575	0.655298	0.879873	0.74218	0.733481	0.730873	0.971757	0.615868	0.678125	0.635655	0.808818	0.843228	0.820617	0.865401
TCGA-BP-4354-01A-02R-1289-07	0.614991	0.888021	0.824324	0.658155	0.721862	0.858868	0.792627	0.941208	0.801444	0.934253	0.533421	0.801015	0.870364	0.483795	0.995904	0.8651	0.651431	0.899461	0.757929	0.803868	0.782378	0.990526	0.655959	0.722257	0.68526	0.844901	0.857946	0.879691	0.757001
TCGA-BP-4974-01A-01R-1334-07	0.5855	0.769113	0.75981	0.672241	0.681512	0.807493	0.742529	0.891678	0.636579	0.917853	0.517172	0.759313	0.761997	0.633394	0.99142	0.75691	0.556231	0.858434	0.704578	0.714264	0.742329	0.965036	0.574533	0.589226	0.57207	0.793101	0.829453	0.837362	0.837106
TCGA-CJ-4641-01A-02R-1325-07	0.624067	0.85361	0.810791	0.757413	0.715218	0.975413	0.813668	0.958264	0.757473	0.963643	0.849527	0.859136	0.85679	0.676076	0.998398	0.807914	0.687181	0.884639	0.760292	0.831412	0.822472	0.987225	0.795882	0.720398	0.721128	0.880627	0.858685	0.849198	0.809099
TCGA-B4-5834-01A-11R-1672-07	0.584674	0.828894	0.74127	0.685927	0.681942	0.807847	0.743507	0.907275	0.697808	0.932148	0.588879	0.801497	0.779686	0.787543	0.993534	0.788563	0.649709	0.858578	0.726301	0.726569	0.705118	0.951141	0.541846	0.628938	0.592154	0.791162	0.833054	0.828074	0.902688
TCGA-BP-4169-01A-02R-1289-07	0.715597	0.850087	0.774751	0.73682	0.733432	0.883258	0.782713	0.916727	0.780111	0.947309	0.678176	0.82099	0.840056	0.804927	0.994796	0.855187	0.646009	0.906881	0.763024	0.771204	0.777135	0.976631	0.675054	0.677158	0.640112	0.843596	0.852289	0.860407	0.857359
TCGA-B2-5633-01B-04R-A277-07	0.587274	0.742617	0.680321	0.555061	0.610598	0.754291	0.665507	0.833322	0.450874	0.893449	0.614924	0.670018	0.824008	0.581747	0.972073	0.740803	0.578503	0.815825	0.624999	0.679495	0.636928	0.96877	0.427932	0.54347	0.574755	0.763244	0.802572	0.777634	0.805147
TCGA-BP-4777-01A-01R-1289-07	0.639318	0.856106	0.814778	0.775063	0.719238	0.982213	0.814375	0.977722	0.725597	0.972858	0.650614	0.871013	0.864687	0.665835	0.997634	0.807251	0.673717	0.867746	0.792859	0.824398	0.811236	0.976219	0.786551	0.758962	0.73053	0.873692	0.859052	0.841295	0.804377
TCGA-B0-5399-01A-01R-1503-07	0.629139	0.801262	0.793656	0.707176	0.702278	0.862484	0.774005	0.935995	0.744246	0.957769	0.813699	0.803884	0.806135	0.682103	0.995494	0.772023	0.713245	0.864578	0.76877	0.753524	0.782112	0.961184	0.556955	0.685083	0.64836	0.827813	0.843558	0.849445	0.821454
TCGA-B0-5099-01A-01R-1420-07	0.713675	0.770515	0.731955	0.66146	0.659926	0.711289	0.696114	0.805425	0.569458	0.87931	0.389166	0.711354	0.77894	0.670509	0.982357	0.720186	0.541131	0.8243	0.676791	0.659613	0.625288	0.89676	0.492834	0.55312	0.543512	0.719207	0.806906	0.807145	0.812645
TCGA-BP-4166-01A-02R-1289-07	0.73018	0.812745	0.781122	0.688618	0.699935	0.865982	0.76533	0.937262	0.757463	0.948748	0.657991	0.822488	0.843906	0.736757	0.99272	0.788338	0.719368	0.859919	0.761359	0.736409	0.744087	0.96708	0.6291	0.662994	0.642679	0.813826	0.840705	0.805941	0.836364
TCGA-CJ-4890-01A-01R-1305-07	0.726536	0.889843	0.799577	0.767968	0.733809	0.982311	0.811928	0.980232	0.759212	0.964754	0.666223	0.884727	0.901856	0.744285	0.996308	0.814851	0.680126	0.896301	0.828685	0.829694	0.807656	0.990821	0.790244	0.755848	0.742167	0.892898	0.865783	0.852903	0.847835
TCGA-B0-5084-01A-01R-1334-07	0.600248	0.736498	0.753896	0.574021	0.674022	0.833495	0.717948	0.818384	0.597853	0.918135	0.477494	0.736259	0.842599	0.401697	0.987712	0.770101	0.473952	0.844257	0.721836	0.666624	0.698708	0.90753	0.615658	0.637144	0.556884	0.753672	0.804677	0.779004	0.73883
TCGA-BP-5168-01A-01R-1420-07	0.609512	0.810896	0.758533	0.668195	0.689475	0.875691	0.755219	0.908371	0.713223	0.943507	0.631497	0.767957	0.827446	0.734317	0.992793	0.731652	0.669739	0.858172	0.757373	0.732824	0.730481	0.957253	0.570388	0.610937	0.620184	0.793966	0.830119	0.831871	0.826684
TCGA-BP-4770-01A-01R-1503-07	0.671742	0.820736	0.764466	0.622131	0.692612	0.879386	0.740262	0.896842	0.68387	0.928211	0.466034	0.781975	0.843406	0.637045	0.978798	0.753042	0.620182	0.879148	0.719969	0.735674	0.747642	0.952497	0.637268	0.611173	0.688557	0.78234	0.82321	0.83717	0.740214
TCGA-BP-4332-01A-01R-1289-07	0.555374	0.792029	0.74808	0.662425	0.678882	0.821428	0.73318	0.880617	0.612719	0.930331	0.616328	0.756132	0.848532	0.703627	0.986834	0.757442	0.573847	0.849314	0.745385	0.701626	0.696536	0.932824	0.508633	0.630059	0.59408	0.779568	0.824793	0.824361	0.830493
TCGA-B4-5832-01A-11R-1672-07	0.749004	0.804759	0.792664	0.70864	0.690075	0.882963	0.750315	0.852332	0.530037	0.920683	0.621032	0.780675	0.811391	0.635677	0.962226	0.804106	0.78135	0.873896	0.714968	0.767813	0.730533	0.896288	0.594301	0.67137	0.742174	0.795916	0.85166	0.853381	0.801272
TCGA-B0-4849-01A-01R-1277-07	0.590662	0.776535	0.746426	0.596945	0.669421	0.84684	0.745472	0.915602	0.560432	0.9444	0.525561	0.780364	0.795276	0.674668	0.995448	0.797393	0.637093	0.845326	0.715966	0.717679	0.723763	0.954187	0.647794	0.633399	0.646742	0.789771	0.827828	0.856222	0.805953
TCGA-B8-5164-01A-01R-1420-07	0.617434	0.884947	0.814649	0.741643	0.708644	0.989092	0.817594	0.984865	0.702762	0.98029	0.603849	0.859551	0.847911	0.69291	0.99949	0.835347	0.657955	0.875042	0.824053	0.839675	0.800079	0.988306	0.76857	0.760679	0.736289	0.876031	0.862425	0.853637	0.835227
TCGA-CW-6093-01A-11R-1672-07	0.565912	0.794553	0.745107	0.668348	0.677616	0.748788	0.731151	0.909885	0.658031	0.887473	0.633794	0.75019	0.789581	0.730044	0.989616	0.82232	0.735025	0.849854	0.723067	0.701857	0.681287	0.928107	0.507958	0.640401	0.584713	0.784724	0.83105	0.826024	0.870251
TCGA-MM-A84U-01A-11R-A37O-07	0.554743	0.796899	0.776089	0.666313	0.687276	0.816947	0.760563	0.918369	0.757348	0.958071	0.618995	0.793156	0.826083	0.723373	0.993	0.78025	0.672461	0.851901	0.764403	0.730747	0.740799	0.9478	0.63168	0.648602	0.563868	0.802679	0.821885	0.842634	0.824955
TCGA-CJ-4637-01A-02R-1325-07	0.738425	0.890354	0.820096	0.765857	0.721351	0.993514	0.826505	0.988974	0.750816	0.97598	0.612493	0.886453	0.821174	0.66181	0.999503	0.801955	0.573834	0.901943	0.786248	0.862002	0.827768	0.989583	0.832162	0.778305	0.758252	0.898351	0.863585	0.874727	0.811891
TCGA-CJ-4642-01B-01R-1305-07	0.350976	0.539889	0.603275	0.49466	0.598409	0.528885	0.625318	0.754682	0.633852	0.853155	0.782946	0.702587	0.722637	0.731914	0.96546	0.647138	0.355275	0.801887	0.696674	0.561633	0.532565	0.937049	0.61671	0.462174	0.554626	0.618438	0.712538	0.839247	0.648956
TCGA-BP-5178-01A-01R-1426-07	0.591899	0.797217	0.786342	0.780393	0.70656	0.873116	0.776932	0.923773	0.731278	0.955162	0.59934	0.811138	0.887072	0.552572	0.988294	0.80157	0.716921	0.879593	0.771424	0.765375	0.777457	0.973703	0.753899	0.691777	0.702055	0.843588	0.84837	0.829462	0.855112
TCGA-BP-4790-01A-01R-1305-07	0.633557	0.830971	0.779231	0.721554	0.727784	0.964938	0.796403	0.939455	0.790999	0.961717	0.790437	0.833651	0.862124	0.730247	0.996589	0.779716	0.712142	0.880378	0.755815	0.781925	0.808432	0.984414	0.693079	0.724304	0.694911	0.852673	0.862449	0.827282	0.858236
TCGA-B0-5692-01A-11R-1541-07	0.719547	0.844021	0.808529	0.711395	0.709847	0.988679	0.815439	0.987541	0.704253	0.97853	0.576075	0.871087	0.8124	0.664236	0.998803	0.815692	0.694991	0.864098	0.797426	0.817564	0.803128	0.967414	0.78542	0.76668	0.734795	0.857139	0.855956	0.873765	0.802113
TCGA-CJ-4885-01A-01R-1305-07	0.602961	0.779962	0.7765	0.66735	0.684847	0.847468	0.748655	0.888861	0.678521	0.938759	0.519504	0.738067	0.759623	0.686666	0.99302	0.774955	0.713915	0.846064	0.721745	0.726253	0.689797	0.935615	0.603041	0.626053	0.675393	0.773875	0.823328	0.808937	0.838655
TCGA-BP-4768-01A-01R-1289-07	0.598434	0.769529	0.764335	0.635244	0.665655	0.856843	0.722752	0.829462	0.597693	0.925592	0.446606	0.715877	0.832832	0.615691	0.989849	0.737398	0.530974	0.822823	0.70494	0.705079	0.683013	0.935182	0.608413	0.597316	0.638773	0.759083	0.816241	0.79646	0.780274
TCGA-B0-5713-01A-11R-1672-07	0.58108	0.823613	0.768047	0.685452	0.688711	0.859005	0.758417	0.936901	0.667859	0.953073	0.530696	0.817181	0.797416	0.635933	0.995142	0.788531	0.70896	0.86763	0.74207	0.735767	0.732866	0.940724	0.63857	0.672365	0.629275	0.801851	0.83907	0.835479	0.870831
TCGA-CW-5587-01A-01R-1541-07	0.618805	0.864299	0.785461	0.714143	0.702315	0.977044	0.798069	0.977753	0.724658	0.977115	0.611592	0.854394	0.839602	0.702006	0.997595	0.812714	0.684917	0.882308	0.787322	0.821296	0.788339	0.986399	0.711914	0.712131	0.725619	0.854742	0.851434	0.868272	0.827131
TCGA-BP-5201-01A-01R-1426-07	0.676831	0.810549	0.778886	0.660384	0.693179	0.968672	0.783229	0.97458	0.665286	0.9692	0.595303	0.860548	0.808363	0.590939	0.996452	0.791565	0.6858	0.874334	0.766065	0.783381	0.788352	0.967257	0.711285	0.71332	0.672825	0.835157	0.842858	0.851949	0.771348
TCGA-CW-5590-01A-01R-1541-07	0.618344	0.821593	0.808918	0.676032	0.700861	0.879818	0.784107	0.945022	0.708999	0.946162	0.620594	0.821991	0.830979	0.704762	0.993403	0.763847	0.716764	0.871082	0.751343	0.766592	0.751192	0.962402	0.639479	0.685312	0.674748	0.818772	0.845745	0.841421	0.855464
TCGA-A3-3370-01A-02R-1420-07	0.635975	0.849494	0.779416	0.671466	0.684055	0.9682	0.778519	0.960749	0.71582	0.975427	0.512682	0.814269	0.801818	0.7411	0.998124	0.794006	0.569769	0.858897	0.748446	0.797279	0.763701	0.980307	0.648503	0.662966	0.678319	0.836182	0.849016	0.843678	0.812564
TCGA-B0-4848-01A-01R-1277-07	0.613908	0.807751	0.804532	0.694994	0.716792	0.925277	0.777203	0.924303	0.683502	0.941936	0.589452	0.788832	0.846878	0.642371	0.992676	0.806931	0.690889	0.87869	0.7536	0.759171	0.761307	0.968672	0.671632	0.702575	0.67935	0.830814	0.847059	0.827806	0.842684
TCGA-B0-4698-01A-01R-1503-07	0.74568	0.928896	0.759168	0.686363	0.713395	0.980936	0.77505	0.969757	0.790375	0.936045	0.573835	0.878876	0.829626	0.47413	0.997535	0.782954	0.659108	0.883847	0.741461	0.833785	0.782716	0.950866	0.766092	0.799922	0.728103	0.84133	0.857746	0.83749	0.70488
TCGA-BP-4982-01A-01R-1334-07	0.592986	0.805634	0.778927	0.676128	0.687981	0.854858	0.761117	0.91847	0.674841	0.945287	0.494144	0.782559	0.793825	0.739718	0.9925	0.807805	0.614978	0.863152	0.747961	0.731312	0.733718	0.975629	0.577436	0.631587	0.633167	0.813618	0.833898	0.839911	0.840799
TCGA-CJ-4636-01A-02R-1325-07	0.697529	0.832473	0.803607	0.683139	0.694513	0.966333	0.792626	0.958743	0.707357	0.96988	0.522684	0.828334	0.869333	0.640476	0.996609	0.804102	0.670966	0.8827	0.751402	0.792932	0.770534	0.980759	0.70201	0.670107	0.647197	0.842034	0.842664	0.855374	0.83621
TCGA-AK-3455-01A-01R-0864-07	0.54292	0.793224	0.781763	0.719128	0.695699	0.98919	0.790514	0.985189	0.623702	0.968297	0.556404	0.843531	0.77283	0.561549	0.998392	0.781451	0.737415	0.856257	0.734376	0.800643	0.792866	0.92508	0.760511	0.746122	0.77552	0.855066	0.850558	0.844627	0.779012
TCGA-A3-A6NN-01A-12R-A33J-07	0.578596	0.808547	0.761767	0.66327	0.686313	0.842398	0.74964	0.946282	0.721559	0.938592	0.543207	0.800097	0.810308	0.658387	0.993877	0.778383	0.726461	0.850207	0.726429	0.725185	0.729587	0.961872	0.584038	0.658607	0.602762	0.808475	0.835918	0.821634	0.863514
TCGA-G6-A8L6-01A-11R-A37O-07	0.59396	0.82259	0.750916	0.680134	0.685523	0.848038	0.767234	0.932242	0.676743	0.932218	0.539238	0.801578	0.807592	0.624649	0.991685	0.810329	0.670403	0.849474	0.760697	0.739642	0.770447	0.954482	0.575422	0.642864	0.675095	0.807375	0.825684	0.851883	0.821807
TCGA-B0-5703-01A-11R-1541-07	0.702528	0.77607	0.783527	0.691453	0.68962	0.9024	0.762685	0.978137	0.646993	0.920909	0.515107	0.836491	0.75553	0.701635	0.995187	0.79582	0.77034	0.850147	0.746251	0.742894	0.751057	0.929561	0.690208	0.682514	0.712695	0.80722	0.836137	0.806959	0.852039
TCGA-BP-4176-01A-02R-1289-07	0.681788	0.844231	0.806045	0.730121	0.723236	0.871485	0.783096	0.895622	0.799108	0.955169	0.737073	0.789478	0.892102	0.668203	0.988955	0.849305	0.689381	0.888113	0.769946	0.769094	0.766031	0.982213	0.650369	0.6779	0.718238	0.839147	0.85284	0.828787	0.855785
TCGA-B0-4707-01A-01R-1277-07	0.495044	0.719528	0.733254	0.687885	0.675752	0.937698	0.746293	0.924833	0.563634	0.910261	0.288574	0.817817	0.758157	0.627251	0.988806	0.74145	0.650691	0.867834	0.629533	0.749921	0.743211	0.875927	0.77046	0.678401	0.654078	0.794012	0.817602	0.836291	0.749657
TCGA-CW-5591-01A-01R-1541-07	0.594878	0.765497	0.728853	0.676068	0.683428	0.74926	0.711835	0.815355	0.714641	0.883169	0.625723	0.727312	0.738428	0.65794	0.9785	0.783682	0.608538	0.845117	0.695813	0.683529	0.664606	0.920403	0.531411	0.600776	0.589162	0.757727	0.827976	0.803927	0.824388
TCGA-B4-5838-01A-11R-1672-07	0.543779	0.827838	0.780943	0.672247	0.68226	0.867338	0.748777	0.870285	0.713567	0.920231	0.677481	0.787167	0.813793	0.701994	0.988427	0.785548	0.657707	0.859094	0.711054	0.75678	0.712162	0.931291	0.618732	0.625075	0.659445	0.783277	0.837075	0.780142	0.830098
TCGA-BP-4775-01A-01R-1289-07	0.637634	0.80646	0.779304	0.689872	0.685673	0.817281	0.761202	0.881055	0.691603	0.945454	0.607645	0.783425	0.809633	0.701394	0.989747	0.814682	0.572009	0.852717	0.743998	0.753361	0.727335	0.958491	0.624976	0.612765	0.617672	0.803532	0.832591	0.815678	0.812989
TCGA-BP-4158-01A-02R-1289-07	0.674302	0.771618	0.76973	0.635166	0.667529	0.811562	0.728386	0.919065	0.616188	0.942488	0.562003	0.780431	0.795439	0.705654	0.993378	0.761524	0.702681	0.854528	0.716125	0.700394	0.697757	0.948252	0.555298	0.612283	0.621409	0.779307	0.816174	0.840665	0.823374
TCGA-CJ-5676-01A-11R-1541-07	0.722686	0.813913	0.783885	0.716899	0.710132	0.92455	0.780829	0.936876	0.686927	0.949576	0.379605	0.817662	0.806144	0.721614	0.990907	0.78317	0.708566	0.875119	0.78756	0.769373	0.782004	0.971561	0.722107	0.680927	0.711214	0.826408	0.840072	0.845157	0.83696
TCGA-DV-5565-01A-01R-1541-07	0.632386	0.810308	0.770634	0.640939	0.708732	0.832158	0.757193	0.884132	0.775887	0.941499	0.596621	0.773054	0.83935	0.687546	0.992226	0.790285	0.644353	0.865905	0.733543	0.718265	0.727183	0.939486	0.639948	0.666592	0.641365	0.786795	0.844718	0.80929	0.867205
TCGA-BP-4163-01A-02R-1325-07	0.587594	0.788592	0.742141	0.695219	0.688373	0.841513	0.747526	0.870978	0.663294	0.939242	0.645919	0.778045	0.835629	0.712307	0.991283	0.805707	0.588726	0.873468	0.731639	0.743065	0.728518	0.969949	0.643421	0.634471	0.637942	0.8188	0.833396	0.846326	0.793855
TCGA-BP-4327-01A-01R-1289-07	0.666921	0.807776	0.762988	0.605739	0.674654	0.824611	0.739052	0.920827	0.669157	0.919311	0.479832	0.755127	0.794794	0.636755	0.984305	0.740268	0.722395	0.858193	0.706426	0.691413	0.700074	0.941196	0.55605	0.6096	0.607305	0.780487	0.827364	0.845546	0.816293
TCGA-BP-5182-01A-01R-1426-07	0.748341	0.861124	0.795686	0.714141	0.722206	0.912974	0.796858	0.944177	0.794014	0.960319	0.799464	0.806631	0.905461	0.771082	0.992915	0.81223	0.655755	0.883288	0.78961	0.788524	0.777564	0.988817	0.650874	0.693461	0.627522	0.8498	0.846496	0.843674	0.857107
TCGA-CJ-4884-01A-01R-1305-07	0.627364	0.836424	0.791344	0.71549	0.693646	0.947308	0.786405	0.945396	0.710601	0.967755	0.661053	0.823692	0.862812	0.610004	0.995734	0.791417	0.724473	0.873438	0.774388	0.797785	0.786288	0.973565	0.679281	0.66724	0.683267	0.84386	0.842887	0.852891	0.827167
TCGA-CZ-5459-01A-01R-1503-07	0.562385	0.799913	0.779038	0.677915	0.69331	0.911382	0.76552	0.902058	0.692026	0.956614	0.590536	0.816974	0.828687	0.609611	0.995415	0.76799	0.659726	0.869781	0.751728	0.738698	0.735396	0.938523	0.696866	0.698887	0.650181	0.801467	0.839189	0.824278	0.807754
TCGA-B0-5096-01A-01R-1420-07	0.747734	0.819373	0.766016	0.689701	0.705167	0.854033	0.759227	0.864188	0.68492	0.948039	0.497437	0.76492	0.874643	0.592358	0.995623	0.804257	0.606852	0.882513	0.739783	0.752755	0.751532	0.977516	0.721295	0.655724	0.695645	0.813607	0.84205	0.842721	0.836451
TCGA-B8-A54J-01A-11R-A33J-07	0.563854	0.816504	0.760179	0.681875	0.689118	0.922545	0.766878	0.953559	0.689964	0.948939	0.537748	0.831419	0.789636	0.720896	0.996798	0.801004	0.703514	0.852563	0.73694	0.747554	0.751104	0.943279	0.68126	0.668138	0.640772	0.816184	0.840662	0.823578	0.846376
TCGA-BP-4987-01A-01R-1334-07	0.548681	0.802556	0.747983	0.69417	0.671424	0.912011	0.752947	0.943724	0.643144	0.927056	0.574062	0.798778	0.801322	0.734521	0.995416	0.770782	0.638542	0.851931	0.736158	0.747838	0.739394	0.961007	0.62086	0.643633	0.612402	0.81062	0.828802	0.817595	0.83202
TCGA-B2-5641-01A-01R-1541-07	0.60068	0.854888	0.799512	0.740953	0.709455	0.973035	0.803869	0.975095	0.695218	0.963275	0.578362	0.845039	0.83868	0.714495	0.998359	0.826178	0.677589	0.883326	0.807499	0.811099	0.782282	0.986458	0.748363	0.732703	0.716002	0.856608	0.865133	0.85135	0.830925
TCGA-AK-3426-01A-02R-1325-07	0.637598	0.856585	0.801222	0.706753	0.71778	0.990664	0.82339	0.988311	0.746147	0.976346	0.603894	0.89576	0.893249	0.63286	0.997182	0.806259	0.672212	0.900421	0.844601	0.850398	0.83188	0.990959	0.810241	0.772583	0.770802	0.885905	0.851051	0.863703	0.796077
TCGA-B4-5377-01A-01R-1503-07	0.592924	0.815168	0.793073	0.702188	0.697451	0.92111	0.765327	0.916616	0.70304	0.948366	0.575766	0.79965	0.819543	0.700911	0.992877	0.816758	0.632581	0.85937	0.748994	0.763283	0.744191	0.95855	0.676371	0.662389	0.653533	0.816937	0.847354	0.824234	0.850273
TCGA-BP-4342-01A-01R-1289-07	0.55808	0.787838	0.750693	0.679987	0.684511	0.786071	0.749555	0.904215	0.69227	0.928507	0.573558	0.777955	0.821995	0.662677	0.987741	0.77238	0.686881	0.85676	0.739213	0.709553	0.746684	0.95515	0.600903	0.613481	0.603162	0.805856	0.822725	0.813804	0.80942
TCGA-BP-4983-01A-01R-1334-07	0.772456	0.956352	0.835427	0.754111	0.720211	0.98353	0.817928	0.977826	0.756169	0.962763	0.681764	0.867563	0.88762	0.518965	0.9954	0.775523	0.573161	0.904878	0.780675	0.85621	0.805623	0.983943	0.792065	0.753834	0.745811	0.879957	0.869291	0.870586	0.814859
TCGA-B0-4833-01A-01R-1305-07	0.692172	0.806335	0.775884	0.633339	0.688926	0.961027	0.776562	0.968671	0.673007	0.964822	0.609157	0.830754	0.791702	0.757226	0.99715	0.790178	0.665043	0.85266	0.740559	0.779451	0.777264	0.954108	0.700216	0.671961	0.669016	0.819166	0.829198	0.840316	0.786879
TCGA-AS-3777-01A-01R-0864-07	0.619354	0.756871	0.677203	0.610422	0.671534	0.742971	0.683553	0.833912	0.712036	0.896323	0.454829	0.755937	0.801581	0.682575	0.983586	0.76811	0.659744	0.855799	0.673688	0.683793	0.672239	0.906508	0.622559	0.581163	0.670995	0.74103	0.814198	0.808722	0.798118
TCGA-CJ-4874-01A-01R-1305-07	0.600682	0.835484	0.805849	0.707923	0.705097	0.968554	0.795483	0.970465	0.710007	0.968327	0.594014	0.841678	0.784219	0.741617	0.996589	0.793757	0.745771	0.873338	0.789339	0.791542	0.775906	0.971974	0.690809	0.693332	0.7206	0.833169	0.848845	0.854775	0.853338
TCGA-CJ-4887-01A-01R-1305-07	0.723155	0.826894	0.791184	0.695062	0.707979	0.977359	0.801817	0.977579	0.686765	0.973662	0.557902	0.856016	0.812694	0.65784	0.997105	0.807085	0.692365	0.882849	0.803905	0.81274	0.789643	0.979304	0.755433	0.707996	0.720246	0.853102	0.848259	0.886191	0.836686
TCGA-AK-3428-01A-02R-1277-07	0.605448	0.819407	0.786893	0.598354	0.692088	0.833515	0.771908	0.85472	0.708505	0.945592	0.618813	0.737177	0.831328	0.65326	0.992609	0.834978	0.638626	0.853972	0.738322	0.742045	0.712954	0.923194	0.563551	0.628554	0.64633	0.777157	0.839222	0.818821	0.832444
TCGA-B8-A54F-01A-11R-A266-07	0.504667	0.793266	0.755052	0.644329	0.678174	0.782415	0.7333	0.861849	0.701358	0.954039	0.663699	0.728434	0.804366	0.677132	0.984256	0.782969	0.662609	0.857516	0.719316	0.718595	0.706606	0.96368	0.554183	0.596124	0.605799	0.785837	0.831745	0.834442	0.821968
TCGA-BP-5187-01A-01R-1426-07	0.680865	0.798022	0.753629	0.689223	0.692675	0.904641	0.735688	0.908405	0.691263	0.935683	0.53252	0.800373	0.759383	0.616048	0.991493	0.737601	0.681379	0.884977	0.703078	0.718962	0.734533	0.943319	0.595002	0.617161	0.614925	0.801376	0.833546	0.859406	0.853874
TCGA-CJ-5681-01A-11R-1541-07	0.620684	0.736278	0.690851	0.663988	0.651381	0.706828	0.678674	0.762111	0.877441	0.906172	0.886578	0.651453	0.866136	0.460368	0.984803	0.761863	0.458874	0.805441	0.655743	0.650479	0.654277	0.93019	0.447723	0.581525	0.592178	0.72812	0.82151	0.762133	0.745492
TCGA-B0-4696-01A-01R-1277-07	0.508873	0.636094	0.668904	0.550188	0.631999	0.567209	0.632436	0.592041	0.526737	0.880755	0.471806	0.630091	0.815753	0.489924	0.979483	0.753801	0.333445	0.839195	0.637108	0.600573	0.616704	0.979363	0.579086	0.408149	0.573288	0.685119	0.783078	0.832925	0.678049
TCGA-B0-5710-01A-11R-1672-07	0.722619	0.817505	0.793972	0.701408	0.700214	0.847174	0.76798	0.923627	0.704026	0.950119	0.7589	0.814979	0.814555	0.720708	0.99563	0.788716	0.675752	0.866636	0.736091	0.733365	0.75692	0.963542	0.604878	0.64442	0.693274	0.810482	0.851391	0.846558	0.901433
TCGA-BP-5175-01A-01R-1426-07	0.64825	0.797756	0.794352	0.590745	0.688625	0.9024	0.771651	0.923536	0.603908	0.955978	0.468928	0.800001	0.820542	0.649298	0.982977	0.770904	0.683458	0.862237	0.70107	0.738833	0.775337	0.954364	0.653125	0.679926	0.675431	0.803741	0.829554	0.838383	0.771416
TCGA-DV-5569-01A-01R-1541-07	0.610567	0.837106	0.79955	0.691911	0.705677	0.893713	0.779605	0.92611	0.670906	0.942828	0.563814	0.805462	0.828586	0.602412	0.994406	0.802377	0.662682	0.882507	0.782647	0.757447	0.738033	0.971227	0.65699	0.701388	0.653921	0.810035	0.848384	0.843312	0.843571
TCGA-BP-5189-01A-02R-1426-07	0.718942	0.805639	0.808611	0.677785	0.701928	0.829466	0.784484	0.892803	0.725856	0.933133	0.586063	0.7717	0.829433	0.704847	0.99237	0.826024	0.635398	0.870154	0.760968	0.765042	0.761031	0.980601	0.665905	0.655136	0.675007	0.818212	0.850035	0.823458	0.856526
TCGA-AK-3443-01A-02R-1325-07	0.58961	0.762751	0.549614	0.611268	0.575962	0.631869	0.58809	0.67876	0.510742	0.904963	0.416987	0.589742	0.681956	0.431272	0.989626	0.709098	0.41463	0.776958	0.593125	0.585605	0.521511	0.75209	0.256697	0.465693	0.502983	0.632809	0.773941	0.710162	0.808609
TCGA-CW-5589-01A-01R-1541-07	0.586063	0.812466	0.765396	0.696264	0.695206	0.785304	0.764145	0.917415	0.734454	0.947927	0.77975	0.744644	0.84528	0.74617	0.989539	0.789749	0.649241	0.864986	0.782894	0.737086	0.721882	0.966077	0.555961	0.632982	0.66985	0.805119	0.834783	0.841044	0.883576
TCGA-B0-5109-01A-02R-1420-07	0.743387	0.811603	0.756512	0.755965	0.723304	0.964662	0.779092	0.972203	0.736141	0.928842	0.613283	0.882557	0.839073	0.708966	0.990952	0.80399	0.671073	0.883892	0.730292	0.794332	0.779122	0.933217	0.790645	0.761626	0.707366	0.852797	0.850271	0.817571	0.776397
TCGA-B8-A8YJ-01A-13R-A39I-07	0.592705	0.836039	0.753909	0.779184	0.713916	0.836168	0.763441	0.90388	0.77662	0.936118	0.600155	0.787059	0.813684	0.859924	0.990251	0.829647	0.710218	0.866715	0.756606	0.755472	0.773523	0.98237	0.707778	0.669538	0.607453	0.852328	0.849381	0.853876	0.86432
TCGA-B0-4810-01A-01R-1503-07	0.696384	0.849493	0.786471	0.671139	0.712401	0.96081	0.787713	0.972091	0.750917	0.961804	0.595651	0.859556	0.804686	0.750249	0.996231	0.777402	0.677925	0.88921	0.768099	0.788334	0.790604	0.973389	0.732679	0.740695	0.674176	0.83965	0.850118	0.871695	0.839183
TCGA-BP-5001-01A-01R-1334-07	0.650915	0.745214	0.779507	0.632104	0.676276	0.917828	0.76207	0.95915	0.640929	0.941331	0.59472	0.82079	0.751508	0.635642	0.990915	0.74692	0.684418	0.827412	0.739253	0.737826	0.757058	0.922093	0.659515	0.645633	0.608053	0.804936	0.800443	0.811295	0.792667
TCGA-EU-5906-01A-11R-1672-07	0.593559	0.812696	0.798043	0.692208	0.69993	0.817143	0.767756	0.891776	0.720154	0.947478	0.650023	0.78335	0.824903	0.77057	0.992539	0.821435	0.654647	0.86024	0.752322	0.744056	0.726731	0.965173	0.607797	0.615384	0.629473	0.804816	0.837998	0.824802	0.86181
TCGA-BP-4993-01A-02R-1420-07	0.671128	0.812044	0.765301	0.675651	0.69512	0.926102	0.750913	0.966686	0.690586	0.943915	0.533712	0.81241	0.797117	0.777946	0.994178	0.778543	0.722411	0.867711	0.751352	0.735827	0.731406	0.956487	0.637516	0.680009	0.65263	0.808355	0.838894	0.850776	0.877511
TCGA-B0-4823-01A-02R-1420-07	0.582035	0.828551	0.79649	0.693213	0.712015	0.947387	0.779033	0.943625	0.746546	0.958716	0.681941	0.812872	0.856651	0.707586	0.992319	0.775918	0.670316	0.876371	0.761477	0.761482	0.750282	0.97162	0.655577	0.67277	0.699124	0.825213	0.846797	0.820633	0.865092
TCGA-DV-5576-01A-01R-1541-07	0.567308	0.741224	0.662725	0.630625	0.652275	0.644114	0.657064	0.784173	0.637853	0.899207	0.477197	0.676341	0.763348	0.695383	0.982286	0.72481	0.552312	0.842945	0.680665	0.589776	0.587504	0.799534	0.438534	0.485293	0.567751	0.701448	0.817624	0.824776	0.806286
TCGA-MM-A563-01A-11R-A266-07	0.762419	0.845319	0.785234	0.74366	0.718308	0.917651	0.797435	0.9485	0.78586	0.966136	0.744706	0.854513	0.850674	0.684347	0.993326	0.819116	0.659871	0.884856	0.785749	0.784221	0.796052	0.975688	0.750821	0.730167	0.691667	0.8545	0.850877	0.854523	0.821654
TCGA-BP-5192-01A-01R-1426-07	0.545078	0.784039	0.755809	0.666136	0.671154	0.792576	0.724883	0.864988	0.646662	0.928726	0.553341	0.752351	0.778242	0.754037	0.987598	0.711011	0.617392	0.838734	0.691589	0.688685	0.690009	0.912109	0.605084	0.638753	0.603773	0.764616	0.819051	0.80808	0.873587
TCGA-CJ-4868-01A-01R-1305-07	0.604519	0.86054	0.786664	0.704591	0.723265	0.949058	0.791388	0.96175	0.802338	0.932911	0.715944	0.84123	0.885037	0.736921	0.996485	0.795672	0.686269	0.898239	0.777104	0.78854	0.780157	0.976455	0.721029	0.729403	0.70099	0.845506	0.85582	0.836861	0.84771
TCGA-A3-A8OU-01A-11R-A37O-07	0.593864	0.801027	0.759577	0.665757	0.688928	0.832748	0.744648	0.922121	0.66895	0.960352	0.603477	0.788745	0.788594	0.686067	0.992214	0.791453	0.652335	0.841773	0.760593	0.734148	0.732049	0.958196	0.53344	0.627509	0.616403	0.805111	0.828087	0.794124	0.842987
TCGA-B0-4718-01A-01R-1277-07	0.619608	0.829654	0.765166	0.649239	0.686153	0.916079	0.771007	0.944165	0.612593	0.954508	0.576963	0.805356	0.759266	0.69364	0.994495	0.762304	0.652321	0.860716	0.716707	0.762958	0.74442	0.958196	0.662803	0.621603	0.678981	0.802417	0.824833	0.833987	0.819911
TCGA-DV-5568-01A-01R-1541-07	0.599433	0.838362	0.798573	0.659004	0.705405	0.956506	0.782615	0.941549	0.696146	0.958992	0.522784	0.806468	0.845503	0.63858	0.98816	0.781793	0.661009	0.87336	0.766124	0.767302	0.771765	0.958943	0.689166	0.639495	0.688649	0.814045	0.8467	0.815648	0.836433
TCGA-AK-3456-01A-02R-1325-07	0.595979	0.829909	0.741427	0.676317	0.665968	0.746449	0.725406	0.821002	0.654473	0.940114	0.630163	0.667443	0.854472	0.585172	0.987228	0.802003	0.646064	0.829823	0.759573	0.712468	0.679008	0.962049	0.412351	0.555816	0.600961	0.774604	0.816812	0.769657	0.774206
TCGA-B0-4837-01A-01R-1305-07	0.616725	0.777599	0.763866	0.634806	0.692663	0.802993	0.744817	0.914714	0.660082	0.91016	0.557945	0.740164	0.851563	0.69283	0.98709	0.775561	0.681121	0.856455	0.75346	0.685411	0.760726	0.927026	0.509137	0.608031	0.688956	0.786017	0.827235	0.803907	0.810141
TCGA-B0-4694-01A-01R-1277-07	0.632611	0.863055	0.806031	0.721603	0.722972	0.969556	0.809232	0.964755	0.756364	0.962289	0.634055	0.851949	0.897486	0.709763	0.995018	0.80516	0.641726	0.899727	0.815938	0.820258	0.795863	0.982724	0.773639	0.731867	0.751482	0.862455	0.861561	0.834884	0.838815
TCGA-BP-4334-01A-01R-1289-07	0.621301	0.746028	0.633255	0.553995	0.629885	0.57	0.657519	0.779118	0.520075	0.907296	0.470197	0.713042	0.76161	0.644008	0.980184	0.722391	0.59176	0.826766	0.68584	0.637762	0.570269	0.889999	0.509799	0.473246	0.637888	0.683636	0.78755	0.773194	0.780758
TCGA-B8-4146-01B-11R-1672-07	0.614038	0.855066	0.811624	0.697243	0.691777	0.924609	0.779968	0.92008	0.692002	0.930847	0.66974	0.830097	0.826764	0.697936	0.990606	0.79835	0.746504	0.863733	0.69499	0.8104	0.742948	0.920069	0.702678	0.705533	0.721995	0.814526	0.85816	0.825319	0.833518
TCGA-CZ-4854-01A-01R-1305-07	0.659907	0.776359	0.792345	0.691495	0.689853	0.844776	0.751277	0.904089	0.618098	0.935595	0.592476	0.797687	0.843315	0.640035	0.988981	0.754277	0.743566	0.856981	0.730181	0.736373	0.734687	0.954443	0.640796	0.659692	0.693231	0.813148	0.833049	0.807344	0.816941
TCGA-DV-5575-01A-01R-1541-07	0.712706	0.832941	0.790135	0.709284	0.707614	0.925355	0.773068	0.932479	0.739125	0.957386	0.653116	0.826225	0.827647	0.728947	0.996537	0.802574	0.673204	0.874579	0.745916	0.759054	0.738776	0.965154	0.648919	0.677286	0.672271	0.818151	0.849382	0.851547	0.84774

## Sheet: correlation
gene	immune_cells	cor	p.value
NOTCH1	aDCs	-0.0665102	0.122988
NOTCH1	APC_co_inhibition	0.0851879	0.0480923
NOTCH1	APC_co_stimulation	-0.0295648	0.493257
NOTCH1	B_cells	0.159691	0.000200601
NOTCH1	CCR	0.100674	0.0194319
NOTCH1	CD8._T_cells	0.0252878	0.557995
NOTCH1	Check.point	0.0527817	0.221099
NOTCH1	Cytolytic_activity	0.137451	0.00139193
NOTCH1	DCs	0.149017	0.000525346
NOTCH1	HLA	0.0245092	0.57007
NOTCH1	iDCs	0.0845575	0.0497758
NOTCH1	Inflammation.promoting	0.0727058	0.091737
NOTCH1	Macrophages	-0.093036	0.0308329
NOTCH1	Mast_cells	0.411882	0
NOTCH1	MHC_class_I	0.123214	0.00417201
NOTCH1	Neutrophils	0.192953	6.69875e-06
NOTCH1	NK_cells	-0.0623443	0.148289
NOTCH1	Parainflammation	0.104305	0.0154444
NOTCH1	pDCs	0.0734831	0.088312
NOTCH1	T_cell_co.inhibition	-0.0254932	0.554684
NOTCH1	T_cell_co.stimulation	0.0623485	0.148262
NOTCH1	T_helper_cells	0.211535	7.20084e-07
NOTCH1	Tfh	-0.0582508	0.176838
NOTCH1	Th1_cells	-0.00905244	0.833863
NOTCH1	Th2_cells	-0.15267	0.000380486
NOTCH1	TIL	0.141173	0.00102516
NOTCH1	Treg	0.143556	0.000839632
NOTCH1	Type_I_IFN_Reponse	0.106325	0.0135534
NOTCH1	Type_II_IFN_Reponse	0.480228	0
ANKRD13C	aDCs	-0.172093	6.0658e-05
ANKRD13C	APC_co_inhibition	0.0351732	0.414979
ANKRD13C	APC_co_stimulation	-0.0483254	0.262626
ANKRD13C	B_cells	0.0282132	0.513237
ANKRD13C	CCR	-0.0645746	0.134291
ANKRD13C	CD8._T_cells	-0.0491474	0.254677
ANKRD13C	Check.point	-0.0715264	0.0971365
ANKRD13C	Cytolytic_activity	-0.117046	0.00654634
ANKRD13C	DCs	-0.0728733	0.09099
ANKRD13C	HLA	-0.0150651	0.727033
ANKRD13C	iDCs	0.105407	0.0143857
ANKRD13C	Inflammation.promoting	-0.0932889	0.0303792
ANKRD13C	Macrophages	-0.0927245	0.0313997
ANKRD13C	Mast_cells	0.0821629	0.0566268
ANKRD13C	MHC_class_I	0.162507	0.000151082
ANKRD13C	Neutrophils	0.22099	2.35057e-07
ANKRD13C	NK_cells	-0.10474	0.015018
ANKRD13C	Parainflammation	-0.0345329	0.423528
ANKRD13C	pDCs	-0.0982117	0.022621
ANKRD13C	T_cell_co.inhibition	-0.0137018	0.750877
ANKRD13C	T_cell_co.stimulation	-0.141345	0.00101057
ANKRD13C	T_helper_cells	0.0548729	0.203391
ANKRD13C	Tfh	-0.129261	0.00265928
ANKRD13C	Th1_cells	-0.0528224	0.220743
ANKRD13C	Th2_cells	-0.17691	3.72611e-05
ANKRD13C	TIL	-0.0189025	0.661384
ANKRD13C	Treg	0.147549	0.000596815
ANKRD13C	Type_I_IFN_Reponse	0.0603403	0.161793
ANKRD13C	Type_II_IFN_Reponse	0.15031	0.000469022
PDK4	aDCs	-0.227566	1.00286e-07
PDK4	APC_co_inhibition	-0.0493284	0.25284
PDK4	APC_co_stimulation	-0.0983287	0.0224597
PDK4	B_cells	-0.0434015	0.314424
PDK4	CCR	-0.167435	9.60011e-05
PDK4	CD8._T_cells	-0.102782	0.0169858
PDK4	Check.point	-0.103426	0.0163372
PDK4	Cytolytic_activity	-0.0419069	0.331391
PDK4	DCs	-0.103905	0.0158452
PDK4	HLA	-0.0260376	0.546259
PDK4	iDCs	0.0544337	0.206966
PDK4	Inflammation.promoting	-0.0973483	0.0238423
PDK4	Macrophages	-0.237123	2.77874e-08
PDK4	Mast_cells	0.170378	7.19266e-05
PDK4	MHC_class_I	0.0310122	0.472453
PDK4	Neutrophils	0.082478	0.0556828
PDK4	NK_cells	0.0755667	0.0796362
PDK4	Parainflammation	-0.163511	0.000140036
PDK4	pDCs	-0.108287	0.0119152
PDK4	T_cell_co.inhibition	-0.0773657	0.0727136
PDK4	T_cell_co.stimulation	-0.171197	6.6321e-05
PDK4	T_helper_cells	-0.107501	0.0125169
PDK4	Tfh	-0.152441	0.000388352
PDK4	Th1_cells	-0.144775	0.000757223
PDK4	Th2_cells	-0.148232	0.000562504
PDK4	TIL	-0.104558	0.0151953
PDK4	Treg	-0.0241569	0.575628
PDK4	Type_I_IFN_Reponse	-0.0153278	0.722467
PDK4	Type_II_IFN_Reponse	0.208043	1.16782e-06
STK11	aDCs	-0.0123613	0.774555
STK11	APC_co_inhibition	-0.114865	0.00762675
STK11	APC_co_stimulation	-0.158888	0.000216137
STK11	B_cells	-0.0535754	0.214225
STK11	CCR	-0.0818235	0.0576582
STK11	CD8._T_cells	0.0477025	0.268927
STK11	Check.point	0.0110759	0.79746
STK11	Cytolytic_activity	0.138038	0.00132709
STK11	DCs	-0.147057	0.000622771
STK11	HLA	0.0504972	0.241761
STK11	iDCs	-0.109975	0.010648
STK11	Inflammation.promoting	0.0885171	0.0399732
STK11	Macrophages	-0.271604	1.70905e-10
STK11	Mast_cells	-0.0500957	0.245527
STK11	MHC_class_I	0.118872	0.0057242
STK11	Neutrophils	-0.104502	0.0152505
STK11	NK_cells	-0.0935988	0.0298309
STK11	Parainflammation	-0.127297	0.00308991
STK11	pDCs	0.0232138	0.59063
STK11	T_cell_co.inhibition	-0.0258995	0.54839
STK11	T_cell_co.stimulation	0.111167	0.0098271
STK11	T_helper_cells	-0.0366067	0.396334
STK11	Tfh	0.0420763	0.329439
STK11	Th1_cells	0.0179671	0.677171
STK11	Th2_cells	-0.0873585	0.0426562
STK11	TIL	0.0428986	0.320068
STK11	Treg	-0.135754	0.00159632
STK11	Type_I_IFN_Reponse	0.117611	0.00628964
STK11	Type_II_IFN_Reponse	-0.170906	6.82641e-05
DAPK2	aDCs	0.0207604	0.630473
DAPK2	APC_co_inhibition	-0.11302	0.00866255
DAPK2	APC_co_stimulation	-0.129294	0.00265258
DAPK2	B_cells	0.0246021	0.568608
DAPK2	CCR	0.0353167	0.413078
DAPK2	CD8._T_cells	-0.000300593	0.994445
DAPK2	Check.point	-0.0145094	0.736721
DAPK2	Cytolytic_activity	0.0623012	0.148571
DAPK2	DCs	-0.00684456	0.873991
DAPK2	HLA	-0.129843	0.00254268
DAPK2	iDCs	-0.0391702	0.363959
DAPK2	Inflammation.promoting	0.0497972	0.248354
DAPK2	Macrophages	-0.0212911	0.621758
DAPK2	Mast_cells	0.000808786	0.985049
DAPK2	MHC_class_I	-0.136162	0.0015316
DAPK2	Neutrophils	-0.0843166	0.0504321
DAPK2	NK_cells	0.0113354	0.79282
DAPK2	Parainflammation	0.130697	0.00238009
DAPK2	pDCs	-0.0653008	0.12996
DAPK2	T_cell_co.inhibition	-0.0576953	0.181008
DAPK2	T_cell_co.stimulation	0.0813116	0.0592435
DAPK2	T_helper_cells	0.0913467	0.0339849
DAPK2	Tfh	0.0179944	0.676709
DAPK2	Th1_cells	-0.0359815	0.404335
DAPK2	Th2_cells	0.0308569	0.474553
DAPK2	TIL	0.0787148	0.0678513
DAPK2	Treg	0.054877	0.203288
DAPK2	Type_I_IFN_Reponse	0.00619119	0.885934
DAPK2	Type_II_IFN_Reponse	0.0664476	0.123341
PIK3CA	aDCs	-0.0642942	0.135992
PIK3CA	APC_co_inhibition	0.123405	0.00413524
PIK3CA	APC_co_stimulation	-0.0574817	0.18263
PIK3CA	B_cells	0.115606	0.00724313
PIK3CA	CCR	-0.0158024	0.714245
PIK3CA	CD8._T_cells	-0.141368	0.000998409
PIK3CA	Check.point	-0.100598	0.0195238
PIK3CA	Cytolytic_activity	-0.199175	3.31125e-06
PIK3CA	DCs	0.0571185	0.185414
PIK3CA	HLA	-0.116498	0.0068037
PIK3CA	iDCs	0.0999039	0.0203839
PIK3CA	Inflammation.promoting	-0.156378	0.000272241
PIK3CA	Macrophages	-0.0170066	0.69353
PIK3CA	Mast_cells	0.230212	7.06819e-08
PIK3CA	MHC_class_I	0.037057	0.390546
PIK3CA	Neutrophils	0.281356	3.53758e-11
PIK3CA	NK_cells	-0.115298	0.00740054
PIK3CA	Parainflammation	0.0335028	0.437493
PIK3CA	pDCs	-0.0976914	0.0233503
PIK3CA	T_cell_co.inhibition	-0.0557885	0.195874
PIK3CA	T_cell_co.stimulation	-0.204045	1.87871e-06
PIK3CA	T_helper_cells	0.0947527	0.0278312
PIK3CA	Tfh	-0.196925	4.28312e-06
PIK3CA	Th1_cells	-0.120882	0.00497436
PIK3CA	Th2_cells	-0.16193	0.000162649
PIK3CA	TIL	-0.0292732	0.497534
PIK3CA	Treg	0.210682	8.49001e-07
PIK3CA	Type_I_IFN_Reponse	-0.0601449	0.163158
PIK3CA	Type_II_IFN_Reponse	0.31854	4.77439e-14
CEACAM6	aDCs	-0.0205215	0.634518
CEACAM6	APC_co_inhibition	-0.0330428	0.443937
CEACAM6	APC_co_stimulation	-0.148587	0.000538447
CEACAM6	B_cells	-0.0961839	0.0255466
CEACAM6	CCR	-0.0561995	0.19266
CEACAM6	CD8._T_cells	-0.000301613	0.994426
CEACAM6	Check.point	-0.0510022	0.237164
CEACAM6	Cytolytic_activity	0.0316532	0.463344
CEACAM6	DCs	-0.0395241	0.359755
CEACAM6	HLA	-0.00789164	0.854961
CEACAM6	iDCs	-0.0652083	0.130535
CEACAM6	Inflammation.promoting	-0.0104096	0.809464
CEACAM6	Macrophages	-0.0916464	0.0334005
CEACAM6	Mast_cells	-0.130558	0.00238899
CEACAM6	MHC_class_I	0.0198789	0.645165
CEACAM6	Neutrophils	-0.00738947	0.864097
CEACAM6	NK_cells	-0.0761539	0.0773155
CEACAM6	Parainflammation	-0.0463002	0.28327
CEACAM6	pDCs	-0.0662465	0.124509
CEACAM6	T_cell_co.inhibition	-0.0280845	0.515282
CEACAM6	T_cell_co.stimulation	0.000527725	0.990247
CEACAM6	T_helper_cells	0.000627227	0.988409
CEACAM6	Tfh	0.0296862	0.491606
CEACAM6	Th1_cells	-0.0347822	0.420309
CEACAM6	Th2_cells	-0.0490034	0.256072
CEACAM6	TIL	0.000974434	0.981993
CEACAM6	Treg	-0.10908	0.0112726
CEACAM6	Type_I_IFN_Reponse	0.0697591	0.105713
CEACAM6	Type_II_IFN_Reponse	-0.168697	8.2961e-05
TLE1	aDCs	-0.202367	2.28739e-06
TLE1	APC_co_inhibition	-0.225075	1.38891e-07
TLE1	APC_co_stimulation	-0.393508	0
TLE1	B_cells	-0.158956	0.000214779
TLE1	CCR	-0.171469	6.45508e-05
TLE1	CD8._T_cells	-0.280261	3.47794e-11
TLE1	Check.point	-0.310328	2.24783e-13
TLE1	Cytolytic_activity	-0.18626	1.39469e-05
TLE1	DCs	-0.0828001	0.0547314
TLE1	HLA	-0.307961	3.47707e-13
TLE1	iDCs	-0.0800131	0.0634276
TLE1	Inflammation.promoting	-0.220431	2.52383e-07
TLE1	Macrophages	-0.197208	4.14752e-06
TLE1	Mast_cells	0.170394	7.18117e-05
TLE1	MHC_class_I	-0.243338	1.04944e-08
TLE1	Neutrophils	-0.178656	3.11287e-05
TLE1	NK_cells	-0.0551583	0.200978
TLE1	Parainflammation	-0.114495	0.00782486
TLE1	pDCs	-0.270273	2.10901e-10
TLE1	T_cell_co.inhibition	-0.34427	2.23954e-16
TLE1	T_cell_co.stimulation	-0.234711	3.86131e-08
TLE1	T_helper_cells	-0.201722	2.34696e-06
TLE1	Tfh	-0.254627	2.29673e-09
TLE1	Th1_cells	-0.335341	1.61998e-15
TLE1	Th2_cells	-0.207507	1.24533e-06
TLE1	TIL	-0.238287	2.3679e-08
TLE1	Treg	-0.199858	3.0608e-06
TLE1	Type_I_IFN_Reponse	-0.135832	0.00158642
TLE1	Type_II_IFN_Reponse	0.212267	6.9959e-07
MAP3K7	aDCs	-0.0117698	0.785072
MAP3K7	APC_co_inhibition	0.0644962	0.134765
MAP3K7	APC_co_stimulation	-0.100523	0.0196144
MAP3K7	B_cells	0.0406924	0.345605
MAP3K7	CCR	-0.0731739	0.089662
MAP3K7	CD8._T_cells	-0.0330608	0.443688
MAP3K7	Check.point	-0.0832854	0.0533235
MAP3K7	Cytolytic_activity	-0.104274	0.0154749
MAP3K7	DCs	-0.0811575	0.0597281
MAP3K7	HLA	-0.016506	0.702115
MAP3K7	iDCs	-0.0431876	0.316817
MAP3K7	Inflammation.promoting	-0.0611357	0.156327
MAP3K7	Macrophages	-0.0562981	0.191816
MAP3K7	Mast_cells	-0.0169505	0.694491
MAP3K7	MHC_class_I	0.134146	0.00180077
MAP3K7	Neutrophils	0.143957	0.000811654
MAP3K7	NK_cells	-0.13604	0.00156005
MAP3K7	Parainflammation	-0.0051558	0.90491
MAP3K7	pDCs	-0.160348	0.000188696
MAP3K7	T_cell_co.inhibition	-0.000291436	0.994613
MAP3K7	T_cell_co.stimulation	-0.106227	0.01364
MAP3K7	T_helper_cells	0.0647719	0.133135
MAP3K7	Tfh	-0.0845297	0.0498512
MAP3K7	Th1_cells	-0.0801961	0.0628236
MAP3K7	Th2_cells	-0.136754	0.00147277
MAP3K7	TIL	0.0110621	0.797707
MAP3K7	Treg	0.099914	0.0203711
MAP3K7	Type_I_IFN_Reponse	0.0224569	0.602797
MAP3K7	Type_II_IFN_Reponse	0.0426467	0.32292
NTRK2	aDCs	-0.10033	0.0198517
NTRK2	APC_co_inhibition	0.0811444	0.0597692
NTRK2	APC_co_stimulation	-0.0973334	0.0238639
NTRK2	B_cells	0.0945161	0.0282577
NTRK2	CCR	0.0778749	0.0708459
NTRK2	CD8._T_cells	-0.0843144	0.0504164
NTRK2	Check.point	-0.0591561	0.170197
NTRK2	Cytolytic_activity	-0.0302393	0.483445
NTRK2	DCs	0.136088	0.00155405
NTRK2	HLA	-0.00711607	0.869037
NTRK2	iDCs	0.172649	5.73761e-05
NTRK2	Inflammation.promoting	-0.0616839	0.152641
NTRK2	Macrophages	-0.0505042	0.241695
NTRK2	Mast_cells	0.341909	3.84897e-16
NTRK2	MHC_class_I	-0.0319591	0.459032
NTRK2	Neutrophils	0.148278	0.000560264
NTRK2	NK_cells	0.00828059	0.847848
NTRK2	Parainflammation	0.0846918	0.0494132
NTRK2	pDCs	-0.0279179	0.517658
NTRK2	T_cell_co.inhibition	-0.0798256	0.0640515
NTRK2	T_cell_co.stimulation	-0.0712415	0.0984782
NTRK2	T_helper_cells	0.044932	0.297754
NTRK2	Tfh	-0.163714	0.000137354
NTRK2	Th1_cells	-0.0556227	0.197208
NTRK2	Th2_cells	-0.166447	0.00010566
NTRK2	TIL	0.00831699	0.847187
NTRK2	Treg	0.0548531	0.203485
NTRK2	Type_I_IFN_Reponse	0.0485355	0.260554
NTRK2	Type_II_IFN_Reponse	0.305572	5.37593e-13
ITGA5	aDCs	0.0507444	0.239461
ITGA5	APC_co_inhibition	0.161438	0.000170363
ITGA5	APC_co_stimulation	0.146117	0.000675223
ITGA5	B_cells	0.18672	1.32721e-05
ITGA5	CCR	0.349001	7.13632e-17
ITGA5	CD8._T_cells	0.0100445	0.816024
ITGA5	Check.point	0.158308	0.000228039
ITGA5	Cytolytic_activity	0.100475	0.0196734
ITGA5	DCs	0.307315	3.91378e-13
ITGA5	HLA	-0.0366662	0.395447
ITGA5	iDCs	0.114919	0.00759792
ITGA5	Inflammation.promoting	0.102404	0.0174314
ITGA5	Macrophages	0.291657	6.2628e-12
ITGA5	Mast_cells	0.225589	1.299e-07
ITGA5	MHC_class_I	-0.0642408	0.136352
ITGA5	Neutrophils	0.186199	1.40401e-05
ITGA5	NK_cells	0.123321	0.00416111
ITGA5	Parainflammation	0.395626	0
ITGA5	pDCs	0.150348	0.000467456
ITGA5	T_cell_co.inhibition	0.0325554	0.450568
ITGA5	T_cell_co.stimulation	0.186992	1.2889e-05
ITGA5	T_helper_cells	0.269284	2.08371e-10
ITGA5	Tfh	0.0990402	0.0215005
ITGA5	Th1_cells	0.0774984	0.0722232
ITGA5	Th2_cells	0.107698	0.012387
ITGA5	TIL	0.181444	2.32787e-05
ITGA5	Treg	0.301021	1.21852e-12
ITGA5	Type_I_IFN_Reponse	0.0917273	0.0332748
ITGA5	Type_II_IFN_Reponse	0.498639	0
BCL2	aDCs	-0.194002	5.95766e-06
BCL2	APC_co_inhibition	-0.0502391	0.244177
BCL2	APC_co_stimulation	-0.104319	0.0154309
BCL2	B_cells	0.00726206	0.866375
BCL2	CCR	-0.181818	2.23799e-05
BCL2	CD8._T_cells	-0.107666	0.0123812
BCL2	Check.point	-0.116157	0.00696901
BCL2	Cytolytic_activity	-0.0796259	0.0647215
BCL2	DCs	-0.110734	0.0101185
BCL2	HLA	-0.00110091	0.97965
BCL2	iDCs	0.0980637	0.0228264
BCL2	Inflammation.promoting	-0.12106	0.00491039
BCL2	Macrophages	-0.286688	1.45655e-11
BCL2	Mast_cells	0.247118	6.84698e-09
BCL2	MHC_class_I	0.108365	0.0118215
BCL2	Neutrophils	0.169005	8.23473e-05
BCL2	NK_cells	-0.043743	0.310629
BCL2	Parainflammation	-0.220584	2.47521e-07
BCL2	pDCs	-0.0895531	0.0376967
BCL2	T_cell_co.inhibition	-0.106507	0.0133932
BCL2	T_cell_co.stimulation	-0.232812	4.99129e-08
BCL2	T_helper_cells	-0.0825482	0.0554555
BCL2	Tfh	-0.228943	8.36353e-08
BCL2	Th1_cells	-0.132559	0.00205782
BCL2	Th2_cells	-0.218535	3.2093e-07
BCL2	TIL	-0.102868	0.016927
BCL2	Treg	-0.0138255	0.748702
BCL2	Type_I_IFN_Reponse	-0.0122451	0.776617
BCL2	Type_II_IFN_Reponse	0.209858	9.38231e-07
PTK2	aDCs	-0.165638	0.000114239
PTK2	APC_co_inhibition	-0.0184865	0.668386
PTK2	APC_co_stimulation	-0.185332	1.54105e-05
PTK2	B_cells	0.0229049	0.595583
PTK2	CCR	-0.125128	0.00363823
PTK2	CD8._T_cells	-0.229394	7.23187e-08
PTK2	Check.point	-0.224475	1.50135e-07
PTK2	Cytolytic_activity	-0.17275	5.67981e-05
PTK2	DCs	-0.0132538	0.758765
PTK2	HLA	-0.222821	1.85901e-07
PTK2	iDCs	0.112384	0.00904788
PTK2	Inflammation.promoting	-0.213664	5.89219e-07
PTK2	Macrophages	-0.185089	1.58169e-05
PTK2	Mast_cells	0.362969	2.90332e-20
PTK2	MHC_class_I	-0.102177	0.0176502
PTK2	Neutrophils	0.0422678	0.32724
PTK2	NK_cells	-0.0834742	0.052784
PTK2	Parainflammation	-0.0917883	0.0331574
PTK2	pDCs	-0.20252	2.24675e-06
PTK2	T_cell_co.inhibition	-0.24429	1.02397e-08
PTK2	T_cell_co.stimulation	-0.281718	3.33309e-11
PTK2	T_helper_cells	-0.0849983	0.0485707
PTK2	Tfh	-0.343321	2.78963e-16
PTK2	Th1_cells	-0.249548	4.82628e-09
PTK2	Th2_cells	-0.29801	2.07672e-12
PTK2	TIL	-0.157913	0.000236514
PTK2	Treg	-0.0124043	0.773792
PTK2	Type_I_IFN_Reponse	-0.0856187	0.0469694
PTK2	Type_II_IFN_Reponse	0.409718	0
MTOR	aDCs	-0.0500821	0.245655
MTOR	APC_co_inhibition	0.102408	0.0174268
MTOR	APC_co_stimulation	-0.103665	0.0160896
MTOR	B_cells	0.10493	0.0148361
MTOR	CCR	-0.00374108	0.930925
MTOR	CD8._T_cells	-0.0427252	0.322138
MTOR	Check.point	-0.0466195	0.279861
MTOR	Cytolytic_activity	-0.098224	0.0226041
MTOR	DCs	0.0458554	0.287825
MTOR	HLA	0.00831768	0.847175
MTOR	iDCs	0.0828878	0.0544748
MTOR	Inflammation.promoting	-0.0760843	0.0775916
MTOR	Macrophages	0.0344136	0.425132
MTOR	Mast_cells	0.137245	0.0014154
MTOR	MHC_class_I	0.13661	0.00147712
MTOR	Neutrophils	0.240239	1.80712e-08
MTOR	NK_cells	-0.223655	1.66955e-07
MTOR	Parainflammation	0.0421775	0.328276
MTOR	pDCs	-0.0221727	0.607396
MTOR	T_cell_co.inhibition	0.00356896	0.934096
MTOR	T_cell_co.stimulation	-0.0836755	0.0522139
MTOR	T_helper_cells	0.22347	1.58371e-07
MTOR	Tfh	-0.0841916	0.0507755
MTOR	Th1_cells	-0.0417051	0.333726
MTOR	Th2_cells	-0.187187	1.26188e-05
MTOR	TIL	0.0623505	0.148249
MTOR	Treg	0.191031	8.29025e-06
MTOR	Type_I_IFN_Reponse	-0.0457446	0.288993
MTOR	Type_II_IFN_Reponse	0.203899	1.91123e-06
CEACAM5	aDCs	-0.0118108	0.78441
CEACAM5	APC_co_inhibition	-0.0818253	0.0576354
CEACAM5	APC_co_stimulation	-0.116569	0.00674304
CEACAM5	B_cells	-0.160667	0.000179823
CEACAM5	CCR	-0.0522978	0.225445
CEACAM5	CD8._T_cells	0.018232	0.672782
CEACAM5	Check.point	-0.0348756	0.419061
CEACAM5	Cytolytic_activity	0.0415368	0.335793
CEACAM5	DCs	-0.0997596	0.0205331
CEACAM5	HLA	0.00985423	0.819449
CEACAM5	iDCs	-0.0755744	0.0796024
CEACAM5	Inflammation.promoting	0.0180721	0.675488
CEACAM5	Macrophages	-0.151537	0.000414982
CEACAM5	Mast_cells	-0.159966	0.000192055
CEACAM5	MHC_class_I	-0.00579326	0.893254
CEACAM5	Neutrophils	-0.110413	0.010309
CEACAM5	NK_cells	-0.0463505	0.282746
CEACAM5	Parainflammation	-0.047873	0.267217
CEACAM5	pDCs	-0.0950751	0.0273017
CEACAM5	T_cell_co.inhibition	-0.0401034	0.35275
CEACAM5	T_cell_co.stimulation	0.0326451	0.449444
CEACAM5	T_helper_cells	-0.0585851	0.174418
CEACAM5	Tfh	0.034337	0.426286
CEACAM5	Th1_cells	-0.0546492	0.205242
CEACAM5	Th2_cells	0.0096698	0.822771
CEACAM5	TIL	-0.020539	0.634227
CEACAM5	Treg	-0.115524	0.0072568
CEACAM5	Type_I_IFN_Reponse	0.01872	0.664551
CEACAM5	Type_II_IFN_Reponse	-0.174564	4.608e-05
BMF	aDCs	0.257795	1.43376e-09
BMF	APC_co_inhibition	0.370441	0
BMF	APC_co_stimulation	0.247701	6.29786e-09
BMF	B_cells	0.364357	0
BMF	CCR	0.370931	0
BMF	CD8._T_cells	0.278834	4.40971e-11
BMF	Check.point	0.392799	0
BMF	Cytolytic_activity	0.294771	3.65864e-12
BMF	DCs	0.315409	8.67786e-14
BMF	HLA	0.294195	4.04335e-12
BMF	iDCs	0.229439	7.8315e-08
BMF	Inflammation.promoting	0.297305	2.35049e-12
BMF	Macrophages	0.334226	2.05103e-15
BMF	Mast_cells	0.0837812	0.0519165
BMF	MHC_class_I	0.207007	1.25089e-06
BMF	Neutrophils	0.338492	8.22e-16
BMF	NK_cells	0.0741799	0.0853296
BMF	Parainflammation	0.375069	0
BMF	pDCs	0.434968	0
BMF	T_cell_co.inhibition	0.373762	0
BMF	T_cell_co.stimulation	0.395501	0
BMF	T_helper_cells	0.617868	4.67729e-58
BMF	Tfh	0.240123	1.83649e-08
BMF	Th1_cells	0.310908	2.01849e-13
BMF	Th2_cells	0.213167	6.26438e-07
BMF	TIL	0.483185	0
BMF	Treg	0.366259	0
BMF	Type_I_IFN_Reponse	0.205524	1.57734e-06
BMF	Type_II_IFN_Reponse	0.114772	0.00767612
CRYBA1	aDCs	0.00766583	0.859067
CRYBA1	APC_co_inhibition	-0.107975	0.0121314
CRYBA1	APC_co_stimulation	-0.112825	0.00874996
CRYBA1	B_cells	-0.14514	0.000725628
CRYBA1	CCR	-0.152531	0.000379707
CRYBA1	CD8._T_cells	0.0412873	0.338707
CRYBA1	Check.point	-0.0559125	0.194946
CRYBA1	Cytolytic_activity	0.0196072	0.649688
CRYBA1	DCs	-0.211752	7.01097e-07
CRYBA1	HLA	0.0131339	0.760955
CRYBA1	iDCs	-0.127656	0.00298792
CRYBA1	Inflammation.promoting	0.0111968	0.795362
CRYBA1	Macrophages	-0.112468	0.00896656
CRYBA1	Mast_cells	-0.198734	3.32535e-06
CRYBA1	MHC_class_I	0.0408306	0.344081
CRYBA1	Neutrophils	-0.164038	0.00013052
CRYBA1	NK_cells	-0.100331	0.0198165
CRYBA1	Parainflammation	-0.105044	0.0146938
CRYBA1	pDCs	-0.128831	0.00273062
CRYBA1	T_cell_co.inhibition	-0.0207945	0.630016
CRYBA1	T_cell_co.stimulation	0.0286184	0.507325
CRYBA1	T_helper_cells	-0.0457275	0.289274
CRYBA1	Tfh	-0.00772308	0.858025
CRYBA1	Th1_cells	-0.00459895	0.915167
CRYBA1	Th2_cells	-0.0895175	0.0377444
CRYBA1	TIL	-0.00393034	0.927463
CRYBA1	Treg	-0.157824	0.000234439
CRYBA1	Type_I_IFN_Reponse	0.0720368	0.0947766
CRYBA1	Type_II_IFN_Reponse	-0.295644	2.46924e-12
CAV1	aDCs	0.124262	0.00388074
CAV1	APC_co_inhibition	0.190152	9.13254e-06
CAV1	APC_co_stimulation	0.257548	1.48768e-09
CAV1	B_cells	0.205033	1.67183e-06
CAV1	CCR	0.328308	6.95924e-15
CAV1	CD8._T_cells	0.0790803	0.0665696
CAV1	Check.point	0.198088	3.75116e-06
CAV1	Cytolytic_activity	0.132212	0.00211462
CAV1	DCs	0.213815	5.78358e-07
CAV1	HLA	-0.0143744	0.739081
CAV1	iDCs	0.162144	0.000159405
CAV1	Inflammation.promoting	0.15319	0.000363205
CAV1	Macrophages	0.193934	6.0028e-06
CAV1	Mast_cells	0.113471	0.00839857
CAV1	MHC_class_I	0.00729279	0.865859
CAV1	Neutrophils	0.164587	0.000126366
CAV1	NK_cells	0.24534	8.82335e-09
CAV1	Parainflammation	0.334257	2.03743e-15
CAV1	pDCs	0.160339	0.000188839
CAV1	T_cell_co.inhibition	0.113774	0.00822485
CAV1	T_cell_co.stimulation	0.1716	6.37114e-05
CAV1	T_helper_cells	0.18538	1.48125e-05
CAV1	Tfh	0.122347	0.00447005
CAV1	Th1_cells	0.149864	0.000487794
CAV1	Th2_cells	0.241377	1.54223e-08
CAV1	TIL	0.195131	5.24779e-06
CAV1	Treg	0.347283	1.0929e-16
CAV1	Type_I_IFN_Reponse	0.119993	0.00530485
CAV1	Type_II_IFN_Reponse	0.440197	0
AKT1	aDCs	-0.0928622	0.031148
AKT1	APC_co_inhibition	0.011314	0.793202
AKT1	APC_co_stimulation	-0.245697	8.3872e-09
AKT1	B_cells	0.000538501	0.990046
AKT1	CCR	-0.0452317	0.294438
AKT1	CD8._T_cells	-0.181418	2.26232e-05
AKT1	Check.point	-0.153371	0.000357366
AKT1	Cytolytic_activity	-0.0901103	0.0365183
AKT1	DCs	0.0577887	0.180301
AKT1	HLA	-0.140983	0.00104149
AKT1	iDCs	0.00860444	0.841974
AKT1	Inflammation.promoting	-0.12589	0.00343619
AKT1	Macrophages	-0.0770246	0.0739869
AKT1	Mast_cells	0.250795	4.028e-09
AKT1	MHC_class_I	-0.084675	0.0494359
AKT1	Neutrophils	0.0223783	0.604068
AKT1	NK_cells	-0.115811	0.00713963
AKT1	Parainflammation	-0.0502962	0.243641
AKT1	pDCs	-0.0556586	0.196919
AKT1	T_cell_co.inhibition	-0.185387	1.53192e-05
AKT1	T_cell_co.stimulation	-0.156924	0.000258999
AKT1	T_helper_cells	0.00439304	0.918952
AKT1	Tfh	-0.201104	2.64966e-06
AKT1	Th1_cells	-0.178448	3.18054e-05
AKT1	Th2_cells	-0.245147	9.06851e-09
AKT1	TIL	-0.0780198	0.0703219
AKT1	Treg	-0.0117509	0.785408
AKT1	Type_I_IFN_Reponse	-0.0409406	0.342669
AKT1	Type_II_IFN_Reponse	0.241737	1.46647e-08
SRC	aDCs	0.131009	0.00232293
SRC	APC_co_inhibition	0.0740118	0.0860416
SRC	APC_co_stimulation	0.143198	0.000865361
SRC	B_cells	0.0698476	0.105256
SRC	CCR	0.114369	0.00789374
SRC	CD8._T_cells	0.171592	6.22217e-05
SRC	Check.point	0.189309	1.0017e-05
SRC	Cytolytic_activity	0.140139	0.0011169
SRC	DCs	0.0771682	0.0734489
SRC	HLA	0.137832	0.0013495
SRC	iDCs	0.0366446	0.395726
SRC	Inflammation.promoting	0.174415	4.80379e-05
SRC	Macrophages	0.0633463	0.141868
SRC	Mast_cells	-0.199054	3.3577e-06
SRC	MHC_class_I	0.274366	9.18797e-11
SRC	Neutrophils	0.0519809	0.228193
SRC	NK_cells	-0.108128	0.0120411
SRC	Parainflammation	0.111362	0.00969868
SRC	pDCs	0.118195	0.00603422
SRC	T_cell_co.inhibition	0.203685	1.96005e-06
SRC	T_cell_co.stimulation	0.259505	1.10902e-09
SRC	T_helper_cells	0.133152	0.00194876
SRC	Tfh	0.223211	1.76793e-07
SRC	Th1_cells	0.208282	1.13478e-06
SRC	Th2_cells	0.0785489	0.0684348
SRC	TIL	0.167496	9.54359e-05
SRC	Treg	0.0434304	0.314102
SRC	Type_I_IFN_Reponse	0.19323	6.49481e-06
SRC	Type_II_IFN_Reponse	-0.364586	0
TFDP1	aDCs	-0.0935776	0.0298681
TFDP1	APC_co_inhibition	0.1001	0.0201372
TFDP1	APC_co_stimulation	-0.0537476	0.212755
TFDP1	B_cells	0.165173	0.000119465
TFDP1	CCR	0.0467636	0.278377
TFDP1	CD8._T_cells	-0.0479677	0.266272
TFDP1	Check.point	-0.0182781	0.671905
TFDP1	Cytolytic_activity	-0.00740268	0.863813
TFDP1	DCs	0.109538	0.0109644
TFDP1	HLA	0.0621128	0.149804
TFDP1	iDCs	0.175008	4.5235e-05
TFDP1	Inflammation.promoting	-0.0170733	0.69239
TFDP1	Macrophages	-0.0611937	0.155934
TFDP1	Mast_cells	0.211533	7.65373e-07
TFDP1	MHC_class_I	0.163814	0.000133355
TFDP1	Neutrophils	0.232345	5.3143e-08
TFDP1	NK_cells	-0.0304996	0.479686
TFDP1	Parainflammation	0.0135054	0.754331
TFDP1	pDCs	0.0525468	0.223163
TFDP1	T_cell_co.inhibition	-0.0199622	0.643678
TFDP1	T_cell_co.stimulation	-0.0745215	0.0838977
TFDP1	T_helper_cells	0.109022	0.0113162
TFDP1	Tfh	-0.105772	0.0140496
TFDP1	Th1_cells	-0.0143752	0.739067
TFDP1	Th2_cells	-0.167009	0.000100055
TFDP1	TIL	0.0483221	0.262658
TFDP1	Treg	0.109518	0.0109788
TFDP1	Type_I_IFN_Reponse	0.0902925	0.0361399
TFDP1	Type_II_IFN_Reponse	0.20942	9.89298e-07
AES	aDCs	-0.0687869	0.110658
AES	APC_co_inhibition	-0.194925	5.37093e-06
AES	APC_co_stimulation	-0.19391	6.01921e-06
AES	B_cells	-0.0781301	0.0699251
AES	CCR	-0.0993694	0.0210688
AES	CD8._T_cells	-0.0075161	0.861792
AES	Check.point	-0.0588056	0.172745
AES	Cytolytic_activity	0.11134	0.00971323
AES	DCs	-0.0821445	0.0566823
AES	HLA	-0.00956274	0.824646
AES	iDCs	-0.0933871	0.0302044
AES	Inflammation.promoting	0.0339415	0.431514
AES	Macrophages	-0.251595	3.58472e-09
AES	Mast_cells	-0.0403847	0.349266
AES	MHC_class_I	-0.0433932	0.314624
AES	Neutrophils	-0.246828	7.13681e-09
AES	NK_cells	0.066038	0.125674
AES	Parainflammation	-0.167191	9.83056e-05
AES	pDCs	-0.0011803	0.978183
AES	T_cell_co.inhibition	-0.124863	0.00371102
AES	T_cell_co.stimulation	0.0261353	0.544754
AES	T_helper_cells	-0.217471	3.42711e-07
AES	Tfh	-0.0011577	0.978601
AES	Th1_cells	-0.0515941	0.231677
AES	Th2_cells	-0.00381687	0.929529
AES	TIL	-0.0746895	0.0832007
AES	Treg	-0.278916	5.27725e-11
AES	Type_I_IFN_Reponse	-0.00911329	0.832763
AES	Type_II_IFN_Reponse	-0.15103	0.000440156
ZNF304	aDCs	-0.205495	1.58281e-06
ZNF304	APC_co_inhibition	-0.0534055	0.215683
ZNF304	APC_co_stimulation	-0.263734	5.82839e-10
ZNF304	B_cells	-0.0259185	0.548097
ZNF304	CCR	-0.246547	7.42966e-09
ZNF304	CD8._T_cells	-0.209286	9.48824e-07
ZNF304	Check.point	-0.247243	6.72514e-09
ZNF304	Cytolytic_activity	-0.200824	2.73715e-06
ZNF304	DCs	-0.0749421	0.082161
ZNF304	HLA	-0.136139	0.00154775
ZNF304	iDCs	0.0203564	0.637142
ZNF304	Inflammation.promoting	-0.240516	1.73897e-08
ZNF304	Macrophages	-0.219091	2.99171e-07
ZNF304	Mast_cells	0.315193	9.0414e-14
ZNF304	MHC_class_I	-0.0583464	0.176183
ZNF304	Neutrophils	0.0336179	0.43592
ZNF304	NK_cells	-0.15237	0.000390795
ZNF304	Parainflammation	-0.186122	1.41561e-05
ZNF304	pDCs	-0.209699	9.56496e-07
ZNF304	T_cell_co.inhibition	-0.197932	3.81851e-06
ZNF304	T_cell_co.stimulation	-0.335567	1.54378e-15
ZNF304	T_helper_cells	-0.0135983	0.752773
ZNF304	Tfh	-0.332574	2.89862e-15
ZNF304	Th1_cells	-0.278517	5.63157e-11
ZNF304	Th2_cells	-0.284996	1.93434e-11
ZNF304	TIL	-0.156233	0.000275864
ZNF304	Treg	-0.0365225	0.397303
ZNF304	Type_I_IFN_Reponse	-0.133982	0.00183898
ZNF304	Type_II_IFN_Reponse	0.325066	1.33359e-14
PTRH2	aDCs	0.0538444	0.21193
PTRH2	APC_co_inhibition	0.00186349	0.965561
PTRH2	APC_co_stimulation	0.0165652	0.701098
PTRH2	B_cells	-0.0871001	0.0432749
PTRH2	CCR	0.0217146	0.61484
PTRH2	CD8._T_cells	0.119365	0.0055251
PTRH2	Check.point	0.0619133	0.151118
PTRH2	Cytolytic_activity	0.1387	0.00125718
PTRH2	DCs	-0.0545874	0.205686
PTRH2	HLA	0.0456676	0.289806
PTRH2	iDCs	-0.108825	0.0114977
PTRH2	Inflammation.promoting	0.137783	0.00135488
PTRH2	Macrophages	-0.0662301	0.124576
PTRH2	Mast_cells	-0.19057	8.72253e-06
PTRH2	MHC_class_I	0.160353	0.000185207
PTRH2	Neutrophils	-0.128885	0.0027373
PTRH2	NK_cells	-0.0416465	0.334406
PTRH2	Parainflammation	-0.0263191	0.541928
PTRH2	pDCs	0.0414444	0.336759
PTRH2	T_cell_co.inhibition	0.0686735	0.111248
PTRH2	T_cell_co.stimulation	0.112027	0.0092704
PTRH2	T_helper_cells	-0.129808	0.00253218
PTRH2	Tfh	0.164056	0.000132948
PTRH2	Th1_cells	0.117223	0.00646483
PTRH2	Th2_cells	0.0782066	0.0696507
PTRH2	TIL	0.0108469	0.801559
PTRH2	Treg	-0.108695	0.0115967
PTRH2	Type_I_IFN_Reponse	0.147624	0.000592955
PTRH2	Type_II_IFN_Reponse	-0.341688	4.04586e-16
SNAI2	aDCs	-0.00090657	0.983242
SNAI2	APC_co_inhibition	0.183802	1.8145e-05
SNAI2	APC_co_stimulation	0.0121502	0.778304
SNAI2	B_cells	0.211877	7.33808e-07
SNAI2	CCR	0.249121	5.13338e-09
SNAI2	CD8._T_cells	0.0654187	0.129296
SNAI2	Check.point	0.0840247	0.051237
SNAI2	Cytolytic_activity	0.147869	0.00058052
SNAI2	DCs	0.229917	7.35093e-08
SNAI2	HLA	-0.0753429	0.0805335
SNAI2	iDCs	0.111711	0.00947184
SNAI2	Inflammation.promoting	0.125529	0.0035305
SNAI2	Macrophages	0.131155	0.00229676
SNAI2	Mast_cells	0.298761	1.81946e-12
SNAI2	MHC_class_I	-0.0500753	0.245806
SNAI2	Neutrophils	0.100665	0.0194425
SNAI2	NK_cells	0.114869	0.00762488
SNAI2	Parainflammation	0.318914	4.44306e-14
SNAI2	pDCs	0.0784606	0.0687467
SNAI2	T_cell_co.inhibition	0.0384431	0.372937
SNAI2	T_cell_co.stimulation	0.117024	0.00655647
SNAI2	T_helper_cells	0.184178	1.68585e-05
SNAI2	Tfh	0.0359809	0.404342
SNAI2	Th1_cells	0.0395098	0.359812
SNAI2	Th2_cells	0.111198	0.00980645
SNAI2	TIL	0.171324	6.54859e-05
SNAI2	Treg	0.240366	1.77566e-08
SNAI2	Type_I_IFN_Reponse	0.11735	0.00640714
SNAI2	Type_II_IFN_Reponse	0.387792	0
MYBBP1A	aDCs	0.0527089	0.221737
MYBBP1A	APC_co_inhibition	0.0451501	0.295311
MYBBP1A	APC_co_stimulation	-0.00440081	0.918783
MYBBP1A	B_cells	0.0289941	0.501644
MYBBP1A	CCR	0.0802421	0.0626724
MYBBP1A	CD8._T_cells	0.11906	0.00564749
MYBBP1A	Check.point	0.0866669	0.044329
MYBBP1A	Cytolytic_activity	0.0938612	0.0293734
MYBBP1A	DCs	0.0188925	0.661551
MYBBP1A	HLA	0.0791044	0.0664982
MYBBP1A	iDCs	-0.0290359	0.501026
MYBBP1A	Inflammation.promoting	0.116781	0.0066696
MYBBP1A	Macrophages	0.0198759	0.645113
MYBBP1A	Mast_cells	-0.0672144	0.119065
MYBBP1A	MHC_class_I	0.19989	2.9078e-06
MYBBP1A	Neutrophils	0.00667421	0.877102
MYBBP1A	NK_cells	-0.213825	5.77664e-07
MYBBP1A	Parainflammation	0.0616176	0.153083
MYBBP1A	pDCs	0.0343347	0.426194
MYBBP1A	T_cell_co.inhibition	0.0881958	0.0407026
MYBBP1A	T_cell_co.stimulation	0.158551	0.000222991
MYBBP1A	T_helper_cells	0.132315	0.00208187
MYBBP1A	Tfh	0.161579	0.000168124
MYBBP1A	Th1_cells	0.140441	0.00108932
MYBBP1A	Th2_cells	-0.0290567	0.500719
MYBBP1A	TIL	0.120282	0.00519504
MYBBP1A	Treg	0.0783797	0.0690335
MYBBP1A	Type_I_IFN_Reponse	0.0836428	0.0523061
MYBBP1A	Type_II_IFN_Reponse	-0.127464	0.00305097
MCL1	aDCs	0.109084	0.011301
MCL1	APC_co_inhibition	0.28319	2.61281e-11
MCL1	APC_co_stimulation	0.156698	0.000264413
MCL1	B_cells	0.248035	6.00343e-09
MCL1	CCR	0.262726	6.80163e-10
MCL1	CD8._T_cells	0.109846	0.0107095
MCL1	Check.point	0.166476	0.00010536
MCL1	Cytolytic_activity	0.0568034	0.187854
MCL1	DCs	0.150398	0.000465394
MCL1	HLA	0.121259	0.00483973
MCL1	iDCs	0.106181	0.013681
MCL1	Inflammation.promoting	0.121428	0.00478074
MCL1	Macrophages	0.0771372	0.0735647
MCL1	Mast_cells	0.168807	8.39637e-05
MCL1	MHC_class_I	0.225538	1.20757e-07
MCL1	Neutrophils	0.339158	7.10465e-16
MCL1	NK_cells	-0.0756759	0.0792013
MCL1	Parainflammation	0.225689	1.28224e-07
MCL1	pDCs	0.104832	0.01493
MCL1	T_cell_co.inhibition	0.183998	1.77692e-05
MCL1	T_cell_co.stimulation	0.100748	0.0193423
MCL1	T_helper_cells	0.196875	4.11971e-06
MCL1	Tfh	0.101762	0.0181512
MCL1	Th1_cells	0.125713	0.00348213
MCL1	Th2_cells	0.0547277	0.204521
MCL1	TIL	0.198771	3.46865e-06
MCL1	Treg	0.337064	1.1204e-15
MCL1	Type_I_IFN_Reponse	0.12913	0.00268633
MCL1	Type_II_IFN_Reponse	0.265048	4.76196e-10
SIK1	aDCs	0.00311024	0.942569
SIK1	APC_co_inhibition	-0.0567948	0.187983
SIK1	APC_co_stimulation	-0.081396	0.0589634
SIK1	B_cells	-0.012983	0.76362
SIK1	CCR	-0.0114443	0.790942
SIK1	CD8._T_cells	-0.0845208	0.0498532
SIK1	Check.point	-0.0822021	0.0564903
SIK1	Cytolytic_activity	-0.0905812	0.0355176
SIK1	DCs	-0.0240894	0.576809
SIK1	HLA	-0.0846061	0.0496219
SIK1	iDCs	0.000888869	0.983574
SIK1	Inflammation.promoting	-0.0570542	0.18597
SIK1	Macrophages	-0.0600612	0.163794
SIK1	Mast_cells	-0.00614453	0.886824
SIK1	MHC_class_I	-0.062837	0.145144
SIK1	Neutrophils	-0.101276	0.0186797
SIK1	NK_cells	-0.0519662	0.228404
SIK1	Parainflammation	-0.0594665	0.168014
SIK1	pDCs	-0.13429	0.0017802
SIK1	T_cell_co.inhibition	-0.0961934	0.0255319
SIK1	T_cell_co.stimulation	-0.0515037	0.232578
SIK1	T_helper_cells	-0.125973	0.0033947
SIK1	Tfh	-0.0586009	0.174302
SIK1	Th1_cells	-0.0803594	0.0622741
SIK1	Th2_cells	-0.0738206	0.0868589
SIK1	TIL	-0.0772129	0.0732747
SIK1	Treg	-0.0401233	0.352511
SIK1	Type_I_IFN_Reponse	-0.134323	0.0017754
SIK1	Type_II_IFN_Reponse	0.059088	0.170743
CHEK2	aDCs	0.178022	3.32372e-05
CHEK2	APC_co_inhibition	0.128267	0.00286983
CHEK2	APC_co_stimulation	0.226946	1.08792e-07
CHEK2	B_cells	0.124852	0.00371414
CHEK2	CCR	0.25039	4.27223e-09
CHEK2	CD8._T_cells	0.255076	1.87997e-09
CHEK2	Check.point	0.250071	4.47464e-09
CHEK2	Cytolytic_activity	0.16511	0.000120189
CHEK2	DCs	0.0645176	0.134635
CHEK2	HLA	0.183133	1.94787e-05
CHEK2	iDCs	0.0550968	0.201482
CHEK2	Inflammation.promoting	0.23352	4.53706e-08
CHEK2	Macrophages	0.294182	4.05211e-12
CHEK2	Mast_cells	-0.268802	2.657e-10
CHEK2	MHC_class_I	0.121942	0.00458162
CHEK2	Neutrophils	0.0929718	0.0309489
CHEK2	NK_cells	0.000762499	0.985905
CHEK2	Parainflammation	0.277553	6.58605e-11
CHEK2	pDCs	0.201143	2.63792e-06
CHEK2	T_cell_co.inhibition	0.298159	2.02305e-12
CHEK2	T_cell_co.stimulation	0.326451	1.01151e-14
CHEK2	T_helper_cells	0.250043	3.9722e-09
CHEK2	Tfh	0.311798	1.71068e-13
CHEK2	Th1_cells	0.297277	2.36225e-12
CHEK2	Th2_cells	0.221453	2.21553e-07
CHEK2	TIL	0.272832	1.40639e-10
CHEK2	Treg	0.194981	5.33707e-06
CHEK2	Type_I_IFN_Reponse	0.165393	0.000116963
CHEK2	Type_II_IFN_Reponse	-0.30992	2.42398e-13
ITGB1	aDCs	-0.0363259	0.399849
ITGB1	APC_co_inhibition	0.218314	3.30003e-07
ITGB1	APC_co_stimulation	0.105214	0.0145667
ITGB1	B_cells	0.249557	4.82035e-09
ITGB1	CCR	0.237862	2.51052e-08
ITGB1	CD8._T_cells	-0.0789191	0.0671279
ITGB1	Check.point	0.0417909	0.332732
ITGB1	Cytolytic_activity	-0.0618305	0.151667
ITGB1	DCs	0.271818	1.6522e-10
ITGB1	HLA	-0.0725742	0.0923276
ITGB1	iDCs	0.236164	3.16847e-08
ITGB1	Inflammation.promoting	-0.0327751	0.447516
ITGB1	Macrophages	0.196155	4.6742e-06
ITGB1	Mast_cells	0.398196	0
ITGB1	MHC_class_I	-0.00338193	0.937562
ITGB1	Neutrophils	0.340111	5.75639e-16
ITGB1	NK_cells	0.0530159	0.219054
ITGB1	Parainflammation	0.290002	8.31196e-12
ITGB1	pDCs	0.0696141	0.106428
ITGB1	T_cell_co.inhibition	0.0047311	0.912711
ITGB1	T_cell_co.stimulation	-0.0311534	0.470317
ITGB1	T_helper_cells	0.231	5.82635e-08
ITGB1	Tfh	-0.0859527	0.0461141
ITGB1	Th1_cells	0.00719838	0.867536
ITGB1	Th2_cells	-0.0177255	0.681273
ITGB1	TIL	0.111739	0.00945357
ITGB1	Treg	0.372792	0
ITGB1	Type_I_IFN_Reponse	0.0323179	0.453881
ITGB1	Type_II_IFN_Reponse	0.581035	0
IKBKG	aDCs	0.109931	0.0106799
IKBKG	APC_co_inhibition	0.281912	3.22776e-11
IKBKG	APC_co_stimulation	0.124538	0.00380196
IKBKG	B_cells	0.243025	1.224e-08
IKBKG	CCR	0.216461	4.16415e-07
IKBKG	CD8._T_cells	0.102048	0.0177946
IKBKG	Check.point	0.192664	6.91753e-06
IKBKG	Cytolytic_activity	0.123237	0.00418679
IKBKG	DCs	0.176413	3.92062e-05
IKBKG	HLA	0.197467	4.02679e-06
IKBKG	iDCs	0.141558	0.000992826
IKBKG	Inflammation.promoting	0.149747	0.000492805
IKBKG	Macrophages	0.134286	0.00179509
IKBKG	Mast_cells	0.0618122	0.151788
IKBKG	MHC_class_I	0.27775	5.27576e-11
IKBKG	Neutrophils	0.268108	2.96166e-10
IKBKG	NK_cells	-0.00415474	0.923309
IKBKG	Parainflammation	0.233844	4.3429e-08
IKBKG	pDCs	0.212752	6.59231e-07
IKBKG	T_cell_co.inhibition	0.200996	2.68317e-06
IKBKG	T_cell_co.stimulation	0.178614	3.1266e-05
IKBKG	T_helper_cells	0.316167	5.60941e-14
IKBKG	Tfh	0.133675	0.00188429
IKBKG	Th1_cells	0.20109	2.65414e-06
IKBKG	Th2_cells	0.0737782	0.0870388
IKBKG	TIL	0.266744	3.66244e-10
IKBKG	Treg	0.329394	5.58022e-15
IKBKG	Type_I_IFN_Reponse	0.173155	5.4541e-05
IKBKG	Type_II_IFN_Reponse	0.102953	0.0168358
E2F1	aDCs	0.0872896	0.0428204
E2F1	APC_co_inhibition	0.047907	0.266784
E2F1	APC_co_stimulation	0.0795655	0.0649252
E2F1	B_cells	0.0400646	0.353102
E2F1	CCR	0.0988356	0.0217725
E2F1	CD8._T_cells	0.170663	6.82712e-05
E2F1	Check.point	0.148204	0.000563899
E2F1	Cytolytic_activity	0.133602	0.00189513
E2F1	DCs	0.101385	0.0185862
E2F1	HLA	0.0960476	0.0257899
E2F1	iDCs	-0.0036085	0.933367
E2F1	Inflammation.promoting	0.16497	0.000121813
E2F1	Macrophages	0.088868	0.0391894
E2F1	Mast_cells	-0.168103	8.99498e-05
E2F1	MHC_class_I	0.144333	0.000777421
E2F1	Neutrophils	-0.0609366	0.157682
E2F1	NK_cells	-0.0296615	0.491845
E2F1	Parainflammation	0.115951	0.00707021
E2F1	pDCs	0.123469	0.00411571
E2F1	T_cell_co.inhibition	0.147456	0.00060165
E2F1	T_cell_co.stimulation	0.193119	6.57585e-06
E2F1	T_helper_cells	0.0990629	0.0214367
E2F1	Tfh	0.228938	8.3687e-08
E2F1	Th1_cells	0.176244	3.98902e-05
E2F1	Th2_cells	0.13198	0.00215333
E2F1	TIL	0.13294	0.00199688
E2F1	Treg	0.0681209	0.11416
E2F1	Type_I_IFN_Reponse	0.080855	0.0606881
E2F1	Type_II_IFN_Reponse	-0.244275	1.02618e-08
BRMS1	aDCs	0.0810804	0.0599713
BRMS1	APC_co_inhibition	-0.0775414	0.0720646
BRMS1	APC_co_stimulation	-0.00390768	0.927857
BRMS1	B_cells	-0.0596042	0.166979
BRMS1	CCR	0.0147774	0.732043
BRMS1	CD8._T_cells	0.124899	0.00368007
BRMS1	Check.point	0.0813575	0.0591002
BRMS1	Cytolytic_activity	0.198549	3.55808e-06
BRMS1	DCs	-0.0323828	0.452974
BRMS1	HLA	0.105546	0.0142568
BRMS1	iDCs	-0.0909056	0.0348908
BRMS1	Inflammation.promoting	0.159489	0.00020442
BRMS1	Macrophages	-0.0959752	0.0259022
BRMS1	Mast_cells	-0.217927	3.46505e-07
BRMS1	MHC_class_I	0.0526002	0.22277
BRMS1	Neutrophils	-0.219153	2.96828e-07
BRMS1	NK_cells	0.101627	0.0183069
BRMS1	Parainflammation	-0.0474893	0.27098
BRMS1	pDCs	0.106705	0.013221
BRMS1	T_cell_co.inhibition	0.0435835	0.312397
BRMS1	T_cell_co.stimulation	0.141853	0.000968665
BRMS1	T_helper_cells	-0.131713	0.00218283
BRMS1	Tfh	0.183086	1.9577e-05
BRMS1	Th1_cells	0.127886	0.00295455
BRMS1	Th2_cells	0.16721	9.81249e-05
BRMS1	TIL	0.0143914	0.738784
BRMS1	Treg	-0.128189	0.00288692
BRMS1	Type_I_IFN_Reponse	0.0554836	0.198331
BRMS1	Type_II_IFN_Reponse	-0.313429	1.26074e-13
TSC2	aDCs	-0.123755	0.00402966
TSC2	APC_co_inhibition	-0.212577	6.73546e-07
TSC2	APC_co_stimulation	-0.303796	7.41225e-13
TSC2	B_cells	-0.157375	0.000248497
TSC2	CCR	-0.277889	6.23708e-11
TSC2	CD8._T_cells	-0.132814	0.00200158
TSC2	Check.point	-0.200184	2.94769e-06
TSC2	Cytolytic_activity	-0.0891416	0.0385874
TSC2	DCs	-0.211822	7.38816e-07
TSC2	HLA	-0.0990282	0.0215163
TSC2	iDCs	-0.140445	0.00108904
TSC2	Inflammation.promoting	-0.131783	0.00218695
TSC2	Macrophages	-0.27428	1.11602e-10
TSC2	Mast_cells	0.0154353	0.720602
TSC2	MHC_class_I	0.0204141	0.636292
TSC2	Neutrophils	-0.096425	0.0252112
TSC2	NK_cells	-0.296035	2.93573e-12
TSC2	Parainflammation	-0.255593	1.99078e-09
TSC2	pDCs	-0.223007	1.81492e-07
TSC2	T_cell_co.inhibition	-0.181076	2.41938e-05
TSC2	T_cell_co.stimulation	-0.124771	0.00373648
TSC2	T_helper_cells	2.5902e-05	0.999521
TSC2	Tfh	-0.160681	0.000182903
TSC2	Th1_cells	-0.218922	3.05637e-07
TSC2	Th2_cells	-0.363713	0
TSC2	TIL	-0.0941467	0.0288824
TSC2	Treg	-0.210299	8.8933e-07
TSC2	Type_I_IFN_Reponse	-0.0471891	0.274023
TSC2	Type_II_IFN_Reponse	-0.0704497	0.102285

## Sheet: immunology factor
ID	Anoikis_score	Consensus	StromalScore	ImmuneScore	ESTIMATEScore	TumorPurity	PD1.flag	CTLA4.flag	RSAD2	PTPRC	FGL2	BTLA	IL7R	POU2AF1	LCK	MS4A6A	CD74	TRBC1	IGHD	SH2D1A	CTLA4	IGHM	IFIT1	TFEC	OAS3	LAIR1	SELL	CD2	CTSS	EVI2B	IFI30	CD70	CD276	LCP2	SLAMF1	TNFRSF18	CD53	DOCK2	TMIGD2	CD40LG	FCER1G	CD40	PSMB9	LPXN	CORO1A	IGLC2	CD163	PDCD1	OAS1
TCGA-3Z-A93Z-01A-11R-A37O-07	0.0122699	1	661.549	1282.68	1944.23	0.629119	0	0	2.27543	3.7649	23.2746	0.120293	1.54111	0.303837	3.2232	9.35879	1732.95	0.361269	20.3267	0.883393	0.265714	14.6624	12.8863	3.32701	4.21132	4.82319	2.39361	6.23334	19.887	5.99544	0.286802	17.6689	13.7702	4.0232	0.354194	1.27682	21.951	1.33405	0.798761	0.440561	27.7105	43.5981	39.83	6.04499	12.2464	90.677	5.01361	0.715257	14.8211
TCGA-6D-AA2E-01A-11R-A37O-07	-0.0771637	1	50.999	755.003	806.002	0.749626	0	0	1.60328	3.6635	15.7431	0.167709	1.77475	0.816764	2.27828	5.01564	630.738	0.154976	17.2011	1.22641	0.382451	19.8658	13.0168	0.673144	4.58095	3.04033	2.01277	5.73804	16.3229	4.7878	0.692052	0.60707	10.3529	2.84754	0.435714	0.40035	16.796	1.30612	0.24565	0.564347	19.8642	2.87824	9.87412	5.62583	9.83056	110.976	8.54109	3.10213	8.35872
TCGA-A3-3306-01A-01R-0864-07	-0.226729	1	52.7452	1312.61	1365.36	0.692819	0	0	1.16869	9.78299	30.2941	0.417344	8.13568	0.0672171	2.12562	15.4737	787.675	0.578486	0.138977	1.28859	0.895744	3.55461	25.6103	15.1859	3.65941	3.84101	4.26835	8.65228	29.2055	12.0175	0.344434	26.8051	11.5602	4.89228	0.567158	0.207917	28.1537	2.03304	0.526658	0.901414	24.796	42.3269	12.1622	9.11194	8.80582	15.4652	11.1356	0.325629	8.62256
TCGA-A3-3307-01A-01R-0864-07	0.0826024	1	560.179	1734.03	2294.21	0.588373	1	1	2.84026	12.6325	34.5312	0.32057	4.83019	0.054275	3.96463	22.2146	1401.3	0.417798	0.366579	2.38216	0.316433	2.66384	15.6136	7.65727	8.30926	5.67413	5.93292	12.9586	50.8048	15.6378	0.38756	22.7554	10.8942	8.88093	0.717615	0.391731	38.4335	2.72707	0.230346	0.726096	50.2201	30.4138	26.2338	11.3574	12.8769	5.46932	23.5115	1.72417	17.6287
TCGA-A3-3311-01A-02R-1325-07	-0.195843	1	927.912	1777.61	2705.52	0.538511	1	0	1.775	13.2192	37.167	0.349558	2.02591	0.806461	3.61834	20.8472	1175.18	0.439455	6.95039	2.0179	0.361496	43.1646	9.08195	10.8443	11.0421	7.3431	6.53464	11.1426	48.18	14.3089	0.878236	33.6634	15.797	8.97383	0.630081	0.625207	39.3373	4.4323	0.226237	0.645074	50.3963	28.1747	19.6641	10.288	15.1534	220.33	19.8299	1.67756	14.4498
TCGA-A3-3322-01A-02R-1325-07	-0.163526	1	731.864	939.459	1671.32	0.659744	1	0	2.47373	6.35342	24.0911	0.0861772	2.138	0.0630091	1.34856	14.6232	848.065	0.37959	1.3679	0.520159	0.310582	3.30536	14.2044	14.7136	13.3241	4.45007	2.28377	2.79571	28.0518	7.33962	1.42968	43.9215	8.19775	4.14006	0.328374	0.697658	18.9524	2.47496	0.218794	0.631233	35.8257	14.7594	10.9794	8.42877	6.13081	4.04568	14.6958	0.331558	14.3831
TCGA-A3-3325-01A-01R-0864-07	0.203976	1	967.227	1534.34	2501.57	0.563493	0	0	1.84805	8.66991	29.4142	0.159221	11.7172	0.454457	3.54658	21.9937	1119.08	0.562565	1.7367	0.994021	1.19775	27.8769	12.0949	8.27325	7.43491	5.19538	3.51129	7.1149	41.0083	10.1883	0.748994	37.4737	14.1723	5.95899	0.797582	2.67066	28.1391	2.75431	0.749953	2.04541	40.9955	17.5527	15.919	11.163	11.3382	98.8311	18.4894	0.485919	9.24849
TCGA-A3-3326-01A-01R-0864-07	-0.0757589	1	533.772	2377.03	2910.8	0.512881	1	0	5.79297	19.0205	51.186	0.858147	20.0057	1.7055	6.86646	25.924	2154.48	1.20271	33.8061	2.57259	2.57397	67.6921	24.5021	10.2767	20.143	7.92454	6.70605	19.1475	83.0711	19.0681	1.10825	18.2512	12.0064	11.0716	1.62505	1.66734	47.3852	5.31305	0.435746	3.77146	65.1627	30.7339	38.6244	15.8436	23.5082	206.927	9.29994	1.64081	24.6777
TCGA-A3-3328-01A-01R-0864-07	-0.0236277	1	-1371.95	-384.376	-1756.32	0.940336	1	0	0.212687	2.20758	3.91076	0.0361167	0.129998	0.0324086	0.143961	0.809303	157.628	0.0325403	0.00781754	0.0490495	0	0.0840123	1.43278	0.0695113	1.73155	0.287859	2.11188	0.103383	8.4447	1.2244	0.850331	0.0174313	10.6732	0.855258	0.00312775	0.146194	6.00856	0.184385	0.148124	0.0293943	4.52927	0.935246	12.031	3.59382	1.12115	0.0289012	1.01067	0.0126323	2.50205
TCGA-A3-3329-01A-01R-0864-07	-0.240844	1	594.272	1757.98	2352.25	0.581463	1	0	2.23537	12.7861	32.8368	0.471741	5.54817	0.121222	4.5178	26.3687	985.871	0.598835	1.86323	1.79063	1.64531	5.70914	17.1222	8.4511	6.09708	5.21278	3.27263	10.6978	43.7116	13.8752	0.326112	37.6375	10.6022	7.91511	0.867605	0.958039	42.7017	2.8734	0.128223	1.77125	48.9031	18.3994	42.1515	9.64939	16.6398	19.2639	13.0896	1.684	9.27513
TCGA-A3-3335-01A-01R-0864-07	-0.300484	1	39.5422	1070.2	1109.74	0.719382	0	0	1.30721	6.82348	11.0934	0.175951	8.11453	0.29447	2.11979	6.80922	1119.3	0.390028	1.25136	1.03042	0.774395	14.1366	11.4925	7.62928	4.41492	3.23344	4.08653	5.82987	25.9756	9.91165	1.56065	90.0259	10.3486	3.41444	0.442615	0.553947	18.3174	1.1703	0.24545	1.04844	40.6156	23.6272	10.7034	7.73453	5.04923	11.331	7.62005	0.476212	9.09487
TCGA-A3-3343-01A-01R-0864-07	-0.190797	1	361.169	2104.28	2465.45	0.567865	1	0	2.96356	13.2907	38.1449	0.450892	15.1263	0.511869	4.36955	20.332	1469.24	0.965328	2.41575	1.50224	1.884	18.339	24.9588	7.79015	9.46539	6.42509	7.59507	12.8575	62.5045	14.4414	0.698495	11.2795	9.99438	8.99724	1.06705	0.734869	40.8167	3.85914	0.706212	3.20642	45.5413	23.0553	23.5639	12.6242	16.2232	52.7284	16.8196	1.36626	14.3292
TCGA-A3-3352-01A-01R-0864-07	-0.420459	1	488.617	1643.34	2131.96	0.607463	1	0	5.20741	10.9695	27.9282	0.217983	7.42678	0.122252	3.7544	15.7271	1463.17	0.700119	2.56229	1.00964	0.527963	8.70917	22.0993	11.9024	13.4908	4.2838	5.72168	8.4396	39.4766	11.5763	0.717314	22.2249	8.54507	7.31148	0.644983	0.661765	27.9282	2.82295	0.878041	1.26281	39.1864	26.8105	22.7172	10.3489	10.4368	14.7299	12.35	0.386507	24.8405
TCGA-A3-3357-01A-02R-1420-07	-0.469219	1	245.042	1861.22	2106.27	0.610454	1	0	2.10091	10.6406	28.017	0.248421	1.25196	0.0807666	4.34509	15.9673	1539.39	1.17857	0.210409	1.28757	0.816199	6.49883	9.52758	8.5276	8.22882	6.12496	2.91606	10.0997	60.0759	12.2247	1.926	46.3342	10.8798	7.23212	0.249432	0.388623	40.8653	3.87332	0.337504	0.307669	59.3304	8.32225	30.3339	11.3734	10.1351	3.0827	24.4683	2.28555	17.5211
TCGA-A3-3358-01A-01R-1541-07	-0.474742	1	950.593	2379.95	3330.54	0.459049	0	1	2.04817	15.9846	33.8817	0.680261	10.8141	1.58852	6.67174	32.8614	1648.07	1.59138	0.581225	3.88989	1.23623	104.615	13.8677	9.27806	8.29383	7.86544	5.07599	19.3383	86.591	18.3023	1.58453	70.7527	10.2581	9.03564	1.21543	1.69079	54.3585	3.83641	0.650285	1.54437	86.8332	37.0065	35.5298	16.0962	18.462	181.901	20.7507	2.36052	16.5516
TCGA-A3-3362-01A-02R-1325-07	-0.32925	1	876.82	1064.62	1941.44	0.629437	0	0	2.41657	6.61244	19.1196	0.175869	5.40035	0.122743	2.03164	11.2762	701.178	0.316907	0.82479	1.20307	0.470262	4.8455	15.7814	6.42867	10.1181	3.82653	4.1278	6.20887	24.4769	7.26964	0.628961	26.115	11.7437	4.98741	0.380761	0.45877	16.411	1.9319	0.154561	0.763384	32.0148	14.5029	15.0695	6.71185	7.45272	28.9442	16.539	0.871429	17.0247
TCGA-A3-3363-01A-01R-0864-07	-0.369129	1	-189.901	1036	846.101	0.745718	1	0	1.44559	5.7634	29.7681	0.16524	0.690897	0.0160731	1.45026	20.2077	918.675	0.157349	0.0436176	0.620317	0.0632537	1.10623	14.3055	23.3822	3.65677	5.64903	2.82139	4.56133	42.68	10.9016	1.20111	1.4394	14.4992	4.31937	0.331571	0.293645	34.47	1.65296	0.389614	0.631416	76.0908	15.0708	15.3799	15.3829	10.6173	3.77332	4.12416	0.267829	22.6795
TCGA-A3-3365-01A-01R-0864-07	0.021706	1	1106.24	1502.52	2608.76	0.550425	0	0	3.8695	9.71611	35.6874	0.314583	8.0541	0.159439	3.93593	15.0691	837.536	0.661341	2.41727	2.24691	1.10633	22.5383	18.7659	5.02305	7.2662	3.74174	6.89984	9.45513	37.5477	10.4963	0.617212	1.34116	16.4526	7.82675	0.513082	0.438607	25.5994	1.60903	0.399345	0.970779	38.3449	28.711	17.7304	9.85286	7.67623	9.14637	8.93652	0.440119	9.97587
TCGA-A3-3367-01A-02R-1420-07	-0.250455	1	535.057	1448.32	1983.38	0.624642	1	0	4.81102	9.96909	34.1527	0.245317	7.49795	0.0995829	2.48338	19.2341	1079.74	0.463099	4.59689	1.04179	0.739485	7.97266	31.9932	8.5106	17.6498	5.01491	2.36303	7.59319	40.8974	11.8057	0.355109	27.587	8.18708	6.15977	0.600923	0.368828	26.4544	2.91893	0.133464	1.61151	36.799	19.7959	14.2131	9.72113	9.07816	15.1156	17.5232	0.569977	21.2166
TCGA-A3-3373-01A-02R-1420-07	0.0697047	1	865.206	1228.43	2093.63	0.611922	1	0	1.39466	7.5153	22.5191	0.251294	3.72077	0.0914162	1.6619	12.1187	1113.4	0.244767	0.529229	0.635411	0.313862	8.1362	9.99352	9.71071	8.33365	3.88099	3.05454	4.05273	50.3872	8.44035	0.253013	13.6608	12.8309	6.39683	0.235268	0.357391	25.6884	2.70082	0.298443	0.5113	36.9212	16.6482	17.3646	5.84723	5.87646	14.0491	15.4809	0.290998	10.24
TCGA-A3-3374-01A-02R-1325-07	-0.0369717	1	168.718	1933.65	2102.37	0.610907	1	0	0.908017	2.74625	4.43916	0.0768739	2.79825	0.0574844	1.07341	7.71866	1049.55	0.153914	0.166395	0.270669	0.290459	5.04004	0.814609	0.905988	5.85176	7.4612	2.59578	1.69269	121.577	8.65654	0.992781	0.164899	18.3959	6.90716	0.318074	0.460994	77.0475	3.00592	0.763178	0.260689	155.27	11.7402	5.59709	25.1076	5.39699	4.5795	19.043	0.448128	5.77367
TCGA-A3-3378-01A-02R-1325-07	-0.0704656	1	897.003	2687.99	3584.99	0.425554	1	0	1.78446	30.7547	52.0646	1.07854	4.00819	2.6348	5.871	38.0977	2321.79	1.36792	5.1248	4.11089	2.04569	301.813	4.52162	4.47872	9.23198	14.3743	9.8522	16.3023	87.7071	27.4401	3.48966	7.62152	22.4559	16.1009	1.12381	1.13637	67.2861	8.04033	0.365049	0.585778	112.471	15.5213	19.0404	14.3341	19.7767	619.724	66.9817	4.57641	10.4686
TCGA-A3-3380-01A-01R-0864-07	-0.22373	1	803.516	1358.83	2162.35	0.603913	0	0	2.29432	5.83574	18.4663	0.201642	8.08633	0.354903	1.93189	14.3756	924.153	0.481992	1.69238	0.931448	0.444927	7.86847	22.367	4.13254	4.86593	3.44951	6.33669	6.01659	37.059	9.93439	0.380188	25.2237	12.3806	5.51925	0.317174	1.06607	24.5247	1.86364	0.482207	1.13035	32.1159	13.2931	13.5001	8.99128	6.09046	45.5421	21.9607	0.53255	10.696
TCGA-A3-3385-01A-02R-1420-07	-0.313905	1	-101.956	395.428	293.472	0.797253	1	0	1.34161	3.97533	11.4823	0.0754503	0.761791	0.0244486	0.434408	6.41114	735.607	0.0679788	0.269468	0.159394	0.0131575	0.661078	18.733	26.4773	8.5041	1.96996	2.0012	2.06837	13.4291	5.77535	0.348534	61.669	6.59349	2.86102	0.101278	0.0407211	14.356	1.43041	0.110515	0.0767583	21.8898	11.204	11.4818	5.56862	4.18324	0.664142	8.17193	0.0725719	12.0101
TCGA-A3-3387-01A-01R-1541-07	0.294692	1	1249.77	1910.28	3160.04	0.481137	0	0	2.42099	14.6964	33.8228	0.326637	7.18848	0.631232	3.40226	33.8508	1616.36	0.64187	25.3127	1.10748	1.35019	36.4391	10.846	6.71772	10.0172	8.5837	4.69955	10.149	43.2617	15.4336	0.618927	23.0534	26.5375	9.6048	0.820674	1.38201	43.8434	4.8241	0.744235	1.14048	72.856	19.1089	20.0768	11.3127	14.4798	103.584	32.943	0.564175	17.0751
TCGA-A3-A6NI-01A-11R-A33J-07	0.0337788	1	410.027	1425.76	1835.79	0.641411	0	0	1.99043	4.7853	15.3381	0.146063	1.37442	0.0308911	2.02889	15.5073	1203.48	0.239271	0.335317	0.427454	0.393649	4.1595	10.9291	5.01278	5.68388	6.17558	1.18297	5.13612	35.3587	7.16296	0.857416	8.29922	19.6999	4.86793	0.298981	0.836089	25.859	2.88804	0.557551	0.432276	60.3954	25.8953	18.0414	8.21158	13.5685	12.9987	12.8504	0.487653	18.8608
TCGA-A3-A6NJ-01A-12R-A33J-07	0.264949	1	642.677	2311.64	2954.31	0.507387	0	1	3.52199	15.3215	24.2743	0.281232	9.02581	0.287908	10.0255	13.411	2858.2	1.49315	3.70674	3.21311	2.18942	49.0247	12.1428	5.26232	10.0201	6.99544	5.28714	21.8174	44.7032	13.9158	1.04019	27.5586	8.64664	8.82695	0.4871	0.935092	42.0866	5.15507	0.470778	0.909413	68.0444	33.268	62.7883	12.6284	29.8258	69.3223	15.3436	6.85039	17.9058
TCGA-A3-A6NL-01A-11R-A33J-07	0.408412	1	924	1913.67	2837.67	0.522066	0	0	2.82373	10.1717	19.843	0.144572	3.20907	0.252251	4.95611	15.7506	1450.58	0.384088	15.4178	1.29216	0.513927	16.4526	16.9118	4.49478	9.3978	5.05076	4.39808	10.101	41.0266	10.0206	1.01915	18.7053	19.8337	9.9607	0.833069	1.51552	27.9398	3.18005	0.146603	0.690138	49.6014	28.8222	26.2986	8.94112	18.1557	44.1398	12.9291	1.54616	11.5937
TCGA-A3-A6NN-01A-12R-A33J-07	0.227994	1	883.009	1704.56	2587.57	0.553019	0	0	2.48515	12.4941	25.1947	0.142779	3.25891	0.0343617	4.33923	19.0474	1224.28	0.680167	0.703351	1.38929	0.515147	5.90186	11.3599	4.66207	6.16141	6.67545	2.27774	11.5239	28.8139	9.15364	0.344816	7.19995	13.9552	7.29934	0.75468	0.77059	36.29	3.5387	0.677882	1.49261	41.615	33.2272	25.2468	8.82425	16.0158	12.2922	29.1393	1.23986	9.24259
TCGA-A3-A8CQ-01A-11R-A37O-07	0.241197	1	723.482	1000.22	1723.7	0.653947	0	0	1.84685	5.89196	18.2287	0.0904857	3.01197	0.0366508	2.24795	9.47731	757.93	0.169845	0.612057	0.503495	0.660767	2.90289	10.5242	10.8216	7.48537	2.87286	1.8491	5.19272	20.5716	6.46812	0.497204	2.26547	15.7658	5.62526	0.34773	0.869889	21.712	2.07294	0.198807	0.621367	22.9466	25.5412	18.0357	5.70368	10.1256	5.52112	8.14302	0.346157	7.71735
TCGA-A3-A8OU-01A-11R-A37O-07	0.271812	1	655.936	1527.98	2183.92	0.601386	0	0	1.04011	6.18016	18.3561	0.0613527	1.20085	0.474073	4.00226	15.3342	1279.61	0.429934	2.83305	0.89494	0.980752	375.538	10.2601	6.04401	2.98726	4.56443	1.85896	9.23135	22.4783	8.76669	0.632344	3.72606	14.9079	5.65174	0.473762	2.00055	32.6146	2.22745	0.329508	0.540942	50.1563	25.5963	18.5264	8.78047	22.1303	158.537	12.3757	1.12659	10.0336
TCGA-A3-A8OV-01A-11R-A37O-07	-0.228398	1	146.113	1299.29	1445.4	0.684298	1	0	1.95526	5.0087	31.7187	0.0166372	0.358626	0.0497636	1.81754	12.041	1221.53	0.333105	0.0120039	0.661105	0.154737	0.498805	19.5115	13.8423	4.98961	3.57164	2.17441	2.88184	32.3639	8.18323	0.809857	4.59034	6.75898	3.35955	0.110461	0.808132	19.3691	1.89279	0.633599	0.191824	42.175	27.1313	29.5793	7.58771	11.8823	0.399401	7.12107	0.155176	15.6495
TCGA-A3-A8OW-01A-11R-A37O-07	0.242331	1	496.215	1294.44	1790.66	0.64648	1	0	4.02635	7.56625	14.1382	0.139495	4.02496	0.167412	5.05112	8.84934	1245.35	0.279292	6.57557	1.46567	0.540579	8.76506	25.4148	8.48958	9.306	4.74731	2.32009	14.3111	23.6136	6.8769	0.215563	16.4074	9.46062	5.48439	0.348989	0.446142	17.5485	2.16936	0.363242	0.714822	22.7462	29.9697	34.4144	7.35526	14.1754	30.2217	9.31201	3.93032	16.1082
TCGA-A3-A8OX-01A-11R-A37O-07	0.247907	1	1066.94	1856.27	2923.22	0.511316	0	0	1.98677	13.7355	33.2715	0.794718	12.5404	0.664561	7.53141	11.961	1557.56	0.834075	2.93171	2.26303	1.23686	28.3124	8.6394	4.4607	5.60933	5.11401	6.31264	18.3927	35.403	11.7861	0.458412	49.5432	18.1077	6.09035	1.31357	0.96852	36.0804	3.43985	0.350468	3.2166	34.4925	9.20762	25.2367	9.05378	20.3361	94.3321	21.6982	2.62272	11.5717
TCGA-AK-3425-01A-02R-1277-07	0.0861091	1	1231.54	2388.76	3620.3	0.420858	0	1	1.98292	11.4918	25.6973	0.327507	5.1582	0.293882	6.56346	30.5364	1677.85	0.590152	9.86547	2.93226	0.494979	74.7774	9.90841	6.83792	7.89978	9.39612	5.77627	20.9611	70.2097	16.216	1.00046	47.7231	15.916	8.66923	0.519979	9.42711	58.7449	3.7808	0.703579	0.66637	99.6017	28.1337	27.524	13.9223	23.4362	128.418	34.0243	3.27422	11.2097
TCGA-AK-3428-01A-02R-1277-07	0.219012	1	522.492	1438.67	1961.16	0.627185	0	0	1.97482	5.57994	26.6223	0.120904	1.78603	0.0947143	1.02313	9.3119	795.415	0.285297	2.3366	0.638546	1.34034	2.74543	15.3096	4.36212	7.95184	2.82445	10.8611	3.11857	28.582	5.93244	0.257375	4.48066	10.6232	7.10035	0.418817	0.466092	28.535	1.04278	0.151794	0.193286	32.126	30.2722	17.294	5.66849	8.38985	39.3217	10.2378	0.589009	8.92571
TCGA-AK-3429-01A-02R-1325-07	-0.350438	1	503.522	2288.45	2791.98	0.527776	0	1	3.27361	16.4436	39.2497	0.525012	5.82931	0.218619	11.9748	17.5708	3397.88	1.72514	0.254019	8.49087	0.99095	60.344	13.9	8.07306	9.20759	3.63842	8.18706	48.6075	59.1343	22.8019	0.340545	94.8723	8.43022	7.81129	0.914681	1.18342	46.2517	2.62363	0.379979	1.29444	73.0292	54.4623	79.0006	11.959	30.7482	47.2021	4.54106	5.71413	31.2036
TCGA-AK-3433-01A-02R-1277-07	0.0175619	1	-782.353	-93.1572	-875.51	0.888618	1	0	0.854646	2.14999	4.00089	0.0321118	0.395724	0.0256132	0.433768	3.62445	328.27	0.0964397	0.264125	0.184133	0.145597	0.59757	1.96618	0.348845	2.49492	1.0061	0.758048	0.622223	7.50828	2.46373	0.191402	0.046495	8.64138	1.57984	0.0834274	0.381282	5.79888	0.508393	0.22577	0.0653369	9.26093	5.80667	2.91383	3.06057	2.04727	4.2656	1.00888	0.101084	3.05732
TCGA-AK-3440-01A-02R-1277-07	-0.268583	1	-1105.15	-128.848	-1234	0.911512	1	0	1.67111	1.73174	4.88984	0.0470364	0.547819	0.0106584	0.108894	1.41679	346.158	0.025684	0.0185111	0.122597	0.223705	0.298399	4.83542	0.316389	0.752968	0.665951	0.435096	0.263632	8.04633	0.72481	0.121065	0.0619132	4.95477	1.84403	0.0370309	0.11539	6.01939	0.230566	0.112739	0.052202	9.15056	11.2855	7.28158	3.65255	0.853548	1.09496	1.07149	0.291642	1.2974
TCGA-AK-3443-01A-02R-1325-07	-0.0528647	1	-1409.01	-654.687	-2063.7	0.954726	1	0	0.281938	1.86679	1.51542	0.0393701	0.111358	0.00535272	0.0435913	0.475262	300.528	0.0214979	0.0309881	0.0162024	0.0312074	0.0388522	0.473286	0.0658229	1.71914	0.108203	1.57812	0.149736	16.1518	0.383164	0.533331	0.0172741	5.44606	0.423773	0.00929862	0.00965835	0.826996	0.0656977	0.0104849	0.0145646	1.20789	1.77508	9.79043	1.78071	0.211885	0.229124	0.521265	0.0187776	1.93116
TCGA-AK-3445-01A-02R-1277-07	-0.0998948	1	836.842	2016.75	2853.59	0.520072	0	0	1.14207	10.9669	13.1578	0.808879	3.56126	0.0620369	7.47799	22.7538	1758.21	1.1212	0.563206	1.59615	0.828592	2.86839	6.93594	4.89658	4.98788	9.00377	2.72433	19.0064	30.4284	12.4342	0.311869	22.6183	20.0782	8.99242	1.62633	2.09121	39.5922	3.56754	0.215418	3.69443	69.396	40.1939	21.8106	11.4605	19.5898	17.6531	14.8072	1.83995	12.3435
TCGA-AK-3450-01A-02R-1277-07	-0.277423	1	265.123	992.558	1257.68	0.704129	0	0	2.08787	2.79853	24.0791	0.0809944	2.41828	0.304015	1.61949	6.59723	885.668	0.0429258	4.14566	0.424171	0.249253	291.641	14.88	3.18289	4.76265	2.1038	2.07488	5.08799	27.3998	5.82313	0.262682	28.6053	9.77314	3.38467	0.235182	0.295708	13.0749	0.823986	0.1954	0.950006	20.2633	12.6441	16.7997	4.32672	5.38433	91.6914	4.52998	0.424933	11.0269
TCGA-AK-3455-01A-01R-0864-07	-0.406297	1	38.0383	2019.72	2057.76	0.616078	1	1	2.79086	22.6063	14.2051	1.1472	9.85811	1.13562	15.8654	6.73785	1978.67	2.59219	145.275	9.60346	1.87672	38.1896	18.3398	12.0186	4.47932	1.72409	2.51247	59.9508	50.5524	17.7203	0.748909	34.6182	6.40649	7.60561	1.4855	0.972952	43.4896	2.38468	0.288059	1.66726	23.213	24.0004	89.193	13.9089	32.7301	365.148	4.35678	12.2858	13.5661
TCGA-AK-3456-01A-02R-1325-07	-0.333063	1	-261.867	958.239	696.373	0.76018	1	0	0.448916	6.18893	15.2488	0.125374	1.92259	0.153412	1.05374	9.36823	667.417	0.10269	3.68823	0.386973	0.0298139	4.1271	5.20662	7.52656	4.01658	4.00696	3.10036	2.27123	49.4173	11.9375	0.526501	1.41649	14.7046	3.71986	0.197409	0.184542	28.7464	2.38308	0.317196	0.359452	45.4809	3.5934	6.73479	7.01999	6.2068	27.1793	11.1703	0.179391	7.26985
TCGA-AK-3460-01A-02R-1277-07	-0.00326327	1	755.645	1462.81	2218.46	0.597328	0	0	2.01292	6.90253	26.8569	0.134429	4.04874	0.088178	2.47549	16.6537	1280.5	0.382476	0.30629	0.939522	0.271442	9.78698	21.3374	6.06419	4.82501	4.30065	2.46693	8.03876	36.0681	9.63219	0.411176	7.81982	8.16525	6.58261	0.294107	0.82099	28.6094	1.9075	0.849796	0.532644	33.619	23.1243	22.2744	8.24899	7.86701	10.5308	17.2971	1.21258	8.34363
TCGA-AK-3461-01A-02R-1277-07	0.231121	1	781.475	1506.82	2288.29	0.589076	0	0	1.5148	10.2153	25.8198	0.164044	8.76975	0.0999515	2.62358	7.99798	891.137	0.583898	1.05208	1.80612	1.64226	5.70968	10.1962	4.06932	7.97367	2.43515	6.46242	8.14727	24.2256	9.61566	0.932515	38.5165	12.4387	6.25732	0.841859	1.21327	27.7641	1.9029	1.2281	0.754085	28.9627	24.9329	18.3672	6.64659	10.0481	28.0044	14.3589	1.36004	8.08208
TCGA-AK-3465-01A-02R-1325-07	0.105649	1	-329.783	-357.896	-687.68	0.875637	1	0	0.540777	2.56035	6.19956	0.103376	1.78351	0.152542	0.558562	2.24649	114.755	0.124185	0.152156	0.180951	0.0937424	6.56632	2.11098	0.636673	1.57486	0.679979	1.69422	0.855865	5.5248	1.98468	0.308086	0.0898074	9.51934	1.36116	0.114591	0.357074	4.69641	0.334445	0.0969079	0.235576	6.6604	5.46274	4.19503	2.29897	1.86108	7.47816	3.52135	0.108471	1.77686
TCGA-B0-4688-01A-01R-1277-07	0.145015	1	240.378	1132.58	1372.96	0.692014	0	0	1.10161	5.09521	5.84664	0.0454388	3.22669	0.233316	0.935779	11.8006	523.721	0.122818	1.37695	0.239982	0.44374	2.63537	2.35248	0.853152	4.68068	8.05907	0.869219	1.67087	18.6026	7.07785	0.575531	14.7263	27.4806	3.75212	0.208558	3.08999	25.9088	9.58141	0.971718	0.110944	69.7566	19.2185	3.8169	27.4418	7.73549	119.773	48.5901	0.254286	1.5145
TCGA-B0-4690-01A-01R-1277-07	-0.058731	1	1224.86	2559.86	3784.72	0.398844	1	1	2.877	28.5599	44.6406	0.69469	6.64231	0.651246	5.77606	27.9931	1781.26	0.826658	0.151313	2.54487	3.6572	18.0227	4.14233	3.67004	12.6524	26.1592	8.92693	22.6753	75.9342	21.9059	2.46749	34.8674	15.9486	14.0544	0.794578	0.825318	72.6015	7.85828	0.191989	0.99565	143.899	21.1129	23.9818	16.4669	15.6387	159.324	58.9642	5.13462	10.7097
TCGA-B0-4694-01A-01R-1277-07	-0.400209	1	1264.52	2612.63	3877.16	0.386365	0	1	3.52873	19.2939	32.9267	0.644008	7.48554	1.17225	10.5786	40.1076	2570.36	1.85777	33.8221	5.58143	1.18956	29.4682	8.67231	7.39881	12.5276	12.448	10.41	38.0726	135.662	24.8338	0.808128	54.6086	15.4942	12.9155	1.44199	1.45205	80.3824	5.38815	0.570947	1.92241	144.403	24.9927	28.7323	19.5813	24.3623	322.362	40.5459	4.27531	17.266
TCGA-B0-4696-01A-01R-1277-07	0.286938	1	103.362	112.904	216.265	0.804043	0	0	0.917489	8.28697	4.79867	0	16.7242	0	0.102176	2.56468	237.351	0.0184763	0.0133163	0.0185668	0.0429138	0.457939	11.6113	0.19208	21.0683	1.3442	0.484099	0.135464	11.4744	2.01977	0.504207	0.0593847	21.3449	0.957623	0.0266389	0.448246	4.96439	0.469355	0.0540673	0.025035	38.8588	35.2821	7.98865	6.1217	10.9356	1.37844	1.97198	0.0430356	9.36531
TCGA-B0-4698-01A-01R-1503-07	0.362243	1	-331.174	2367.31	2036.14	0.618575	1	1	3.55496	14.7784	18.7633	0.370487	5.18218	0.268473	14.0402	15.942	1597.98	1.90415	0.653115	6.47238	5.1753	25.3032	5.02621	1.45224	31.3044	6.95091	4.6792	30.1417	46.6264	14.7134	3.55716	63.911	15.0964	8.75028	1.90523	2.56643	50.1075	5.05228	0.33567	0.380796	100.924	12.3548	71.6828	14.6357	26.6872	19.4998	21.714	7.78833	10.3242
TCGA-B0-4699-01A-01R-1277-07	0.126296	1	514.214	1846.67	2360.89	0.580431	1	1	10.394	14.4231	18.0818	0.313884	4.02297	0.115298	6.98429	15.9798	1168.8	1.07498	0.041718	5.27656	1.70934	0.828341	18.7365	1.87828	15.8715	6.84709	3.04442	27.1971	38.8269	11.4762	2.01451	31.7137	14.5543	8.54075	0.410125	0.743007	40.2861	4.01719	0.524285	0.151259	113.46	20.0402	35.2892	11.4253	16.275	1.9389	30.394	3.99175	13.5496
TCGA-B0-4700-01A-02R-1541-07	0.159814	1	1531.14	2722.96	4254.1	0.334766	0	1	2.86994	15.9141	12.6988	0.703608	8.91373	1.61947	13.5698	18.8913	3145.6	2.57769	5.41142	5.70774	2.68025	435.962	6.50277	2.25377	13.8291	8.90996	9.85048	43.0502	48.8658	17.941	1.97795	86.3178	23.778	13.1335	1.74157	3.79743	47.0171	3.51509	1.44723	1.64483	111.189	23.4421	52.7091	14.7767	34.795	323.847	26.919	9.15444	20.4026
TCGA-B0-4701-01A-01R-1277-07	0.319493	1	523.339	1934.68	2458.02	0.568762	0	0	2.87173	11.9464	14.6785	0.703401	15.2401	0.657482	6.63713	15.6707	1376.11	1.39797	1.89196	2.35697	2.80503	139.254	9.56264	3.11681	10.155	4.97277	6.00649	19.6792	30.8796	11.7661	2.10402	22.8405	12.9211	8.41763	1.33924	2.77745	40.8806	3.0573	0.484846	2.50458	39.6109	30.8571	25.5011	11.1688	14.6382	42.8363	17.4699	3.55469	17.0223
TCGA-B0-4706-01A-01R-1503-07	0.00216721	1	246.824	1219.71	1466.53	0.682033	0	1	2.70481	6.73626	7.02845	0.161751	1.55219	0.128581	4.40958	2.88577	371.731	0.485779	1.35314	1.78772	0.350685	5.19977	26.5011	2.33717	11.4021	1.81224	2.06992	10.165	7.37382	4.53972	0.690517	32.2502	17.2994	4.39971	0.382376	1.43924	14.4836	1.02439	1.16541	0.569273	15.374	21.6432	25.3268	7.56018	16.0061	29.0356	0.923067	1.7584	24.7674
TCGA-B0-4710-01A-01R-1503-07	0.268067	1	676.295	1430.58	2106.88	0.610383	0	0	2.95322	9.29146	16.2697	0.15152	2.58545	1.02774	4.91605	9.00187	526.861	0.730843	2.68338	1.57277	0.360316	441.752	15.1387	5.43376	8.17575	4.33889	5.43819	8.92722	18.9381	8.73321	1.45049	14.9915	15.6272	5.84185	0.564636	0.557569	22.9324	2.27429	0.416974	0.513824	22.1342	18.2042	18.3673	8.15372	14.8386	258.665	7.97787	1.30885	14.0582
TCGA-B0-4714-01A-01R-1277-07	-0.15915	1	693.706	2637.82	3331.52	0.458921	0	1	3.42942	17.0681	23.7341	0.348828	2.51251	0.0757292	10.7085	21.7449	2854.86	1.92627	0	4.03271	1.77587	3.50743	15.5517	11.7429	8.52583	8.08714	3.99976	35.0471	31.3136	19.5555	4.05778	41.3834	6.94344	11.5286	1.09629	2.04966	48.9607	4.00192	0.593352	1.23634	89.998	35.6659	47.0173	15.303	36.5788	5.89792	3.47447	6.72025	18.4793
TCGA-B0-4810-01A-01R-1503-07	0.0775053	1	1151.46	2244.92	3396.39	0.450441	0	1	4.57017	9.56848	23.7842	0.291093	4.19863	0.557654	9.43887	17.9224	1801.83	1.28636	3.81646	3.4199	1.11678	29.7868	13.3809	2.40639	9.42629	8.47648	5.73769	30.6928	33.8312	12.124	1.72266	25.5495	15.6624	10.0533	1.17041	3.34409	49.2628	3.16661	0.694382	1.81068	82.1799	28.667	37.8491	11.7469	29.8072	184.287	18.7856	5.75247	15.4578
TCGA-B0-4814-01A-01R-1277-07	-0.300259	1	521.302	933.391	1454.69	0.683303	0	0	2.8168	5.30468	14.041	0.108024	2.8275	0.856499	2.01052	7.11632	901.413	0.494358	0.846205	0.954748	0.421611	22.966	20.8684	5.56836	9.62737	2.82751	2.92414	5.35748	16.6469	7.11315	2.01595	42.3422	10.9774	3.16868	0.436566	0.610776	14.8207	1.32635	0.256177	0.575649	23.4955	23.4123	20.5155	7.79349	7.00413	271.059	4.84839	0.404816	13.1588
TCGA-B0-4815-01A-01R-1503-07	-0.0496035	1	870.929	2888.79	3759.72	0.402207	0	1	2.18091	29.2856	29.135	1.39317	6.68785	16.7856	18.0236	33.8391	2266.17	2.785	7.00171	7.80466	3.75814	1019.02	5.48146	5.09268	11.4235	15.7445	10.4606	44.8928	78.7185	30.5674	3.77572	42.7181	13.441	18.2796	3.49131	2.64342	82.4428	7.55076	0.637697	1.81594	139.032	55.2227	45.3838	23.8529	43.4951	2786.81	34.6774	15.6082	17.2993
TCGA-B0-4819-01A-01R-1277-07	-0.0340543	1	1276.97	3247.97	4524.94	0.297049	0	1	1.99783	24.0392	17.9119	1.36953	22.0728	3.03943	18.4941	19.7142	1682.87	4.06734	25.9767	8.84043	8.64204	80.4137	3.90252	3.69669	3.90458	9.32626	18.3739	55.8106	59.3753	28.4002	11.1638	32.6332	10.5808	15.6512	3.74697	6.41963	61.7929	5.24166	1.36706	2.50789	96.5634	29.5794	35.521	20.6452	36.1074	1647.17	8.33585	13.0841	10.2992
TCGA-B0-4823-01A-02R-1420-07	0.11362	1	1174	1789.15	2963.14	0.50627	0	0	4.06548	9.07231	23.6637	0.101128	3.95383	0.28714	4.44961	15.5647	1425.63	0.686654	16.8453	1.38667	0.161019	25.1465	12.4707	4.63924	3.90866	6.36835	2.79769	12.4117	56.0589	12.6778	0.190004	32.086	13.0963	6.27859	0.277964	0.403414	37.4886	3.06819	0.24473	0.688856	51.8683	23.7106	16.1388	7.45882	12.9481	126.523	33.4752	1.28412	11.2344
TCGA-B0-4824-01A-01R-1277-07	-0.239438	1	786.374	2266.7	3053.08	0.494842	0	1	3.45469	16.4421	32.832	0.187176	2.25334	0.102641	8.04107	18.1312	2300.16	1.48029	0.202573	4.00129	1.10979	2.54464	21.5012	13.7506	9.63914	8.42515	5.12114	27.4213	57.5948	24.5135	3.32839	17.1642	7.39602	12.896	0.475482	1.31326	47.8625	3.85094	0.566604	0.888629	70.9934	31.4275	41.8151	14.3802	29.2697	5.94131	19.4911	8.01973	27.8968
TCGA-B0-4827-01A-02R-1420-07	0.280317	1	1337.68	2018.59	3356.27	0.45569	0	1	1.56294	10.9684	19.0787	0.345557	5.60127	2.94149	4.37735	15.4257	1767.68	0.290136	41.2909	1.86709	0.259185	100.681	5.22612	1.23638	10.2389	6.96968	7.24397	13.3605	50.3174	13.7832	0.304524	2.83344	20.8729	8.31339	0.897768	1.05282	37.5649	3.34948	0.261239	0.92234	67.2448	6.4743	13.3523	9.08735	16.289	546.499	28.3952	2.65119	7.52234
TCGA-B0-4833-01A-01R-1305-07	-0.264769	1	570.13	1942.66	2512.79	0.562132	0	1	2.88864	7.54786	15.0409	0.331572	2.52411	0.424015	6.16127	11.1314	2491.21	0.454601	5.46072	4.00268	1.86035	29.6216	15.7533	5.16688	5.62937	4.22952	3.40316	24.1882	23.0935	13.9286	1.93337	55.5057	10.1746	7.49345	0.855192	2.31471	29.9153	1.9826	0.527898	1.12929	45.4182	24.7079	41.2476	10.5859	22.5944	111.784	6.09248	4.80274	12.2926
TCGA-B0-4834-01A-01R-1305-07	-0.0520474	1	-572.48	-403.78	-976.26	0.895304	1	0	0.690157	1.05126	5.11325	0.0138124	0.393237	0.00459049	0.249792	1.0846	66.632	0.0138274	0.00996577	0.0347378	0.0160581	0.207057	4.57548	0.0945203	2.09804	0.318455	0.318568	0.334551	3.34553	0.747567	0.267569	0.0111107	5.60525	1.41924	0.015949	0.0621224	1.66942	0.137334	0.0134877	0.0374717	2.89578	4.59386	5.40234	1.99401	0.482236	0.221059	1.28254	0.00805181	0.822346
TCGA-B0-4843-01A-01R-1277-07	0.114124	1	1013.77	1321.78	2335.56	0.583455	0	0	0.367955	2.32351	4.86828	0.124966	1.63148	0.152629	2.99559	6.5259	629.712	0.262712	1.3795	0.51857	0.414055	8.28458	3.43519	0.448957	2.85004	3.75506	3.12803	5.62708	21.215	4.11384	1.21039	1.76416	23.6501	7.09197	0.454531	1.3489	11.0613	0.700703	0.567431	0.71194	31.0555	16.5731	12.4749	5.79605	8.89188	15.9499	2.87706	0.535429	3.72624
TCGA-B0-4845-01A-01R-1277-07	0.0389997	1	254.015	876.171	1130.19	0.717294	0	0	1.20158	4.49706	16.133	0.188966	8.44191	0.0807451	2.31344	6.93143	523.842	0.437794	0.0934903	0.741378	0.76263	6.3464	10.7611	7.47237	5.12128	2.53243	2.49045	6.78813	11.5238	5.85704	0.716024	9.06807	12.9838	4.52163	0.598478	0.451654	16.304	1.22022	0.253061	1.30724	17.7861	27.7326	12.3842	7.65397	7.11781	5.83252	4.09986	0.821446	7.61771
TCGA-B0-4848-01A-01R-1277-07	-0.120574	1	1015.38	1927.12	2942.5	0.508881	0	0	2.9189	13.1715	28.4956	0.171333	4.19901	0.438844	4.76221	18.8511	1698.52	0.496813	0.99747	2.30902	0.339994	28.6768	11.8704	6.05432	10.7767	7.63159	6.48448	12.8789	57.9682	22.0107	0.457794	53.8067	17.2584	8.92798	0.87491	0.526122	45.9838	3.00603	0.328842	0.997738	76.6057	34.885	17.5405	12.0322	21.4609	168.307	16.7845	1.1262	15.9124
TCGA-B0-4849-01A-01R-1277-07	0.237094	1	558.379	1604.35	2162.72	0.603869	0	0	2.73429	10.35	25.1331	0.0677123	1.66062	0.0506336	2.66901	11.9914	1450.77	0.610071	0.70351	1.2159	1.91292	8.55792	18.836	4.79871	11.0315	5.03704	3.05911	6.61987	36.0223	13.0361	1.76575	28.1052	10.8408	8.52181	0.615716	1.7907	28.2346	2.32465	0.654593	0.606198	50.7676	27.5197	28.1461	8.40191	11.9128	14.5214	11.2096	1.75256	19.7857
TCGA-B0-4852-01A-01R-1503-07	-0.167336	1	563.469	1282.52	1845.99	0.640262	0	0	3.38003	9.25395	18.5517	0.226643	2.78052	0.599374	2.78792	11.2876	787.392	0.713869	1.16661	1.96441	0.419335	131.423	18.0553	7.73583	6.6095	3.36516	5.22726	8.85504	23.2425	10.5536	1.05848	12.9996	9.77578	5.81726	0.540954	0.454975	21.7532	1.75907	0.259101	0.641103	29.5101	22.6808	21.3779	8.68989	7.79745	79.247	6.98563	0.594536	12.7321
TCGA-B0-4945-01A-01R-1420-07	0.206411	1	557.836	1042.16	1600	0.667576	1	0	3.16112	5.38754	20.3009	0.167567	2.81464	0.194914	2.09652	9.19274	638.263	0.201298	1.35408	1.12099	0.487023	21.8624	16.1554	7.13569	5.95142	3.38492	2.23548	5.81736	28.4154	7.12577	0.399512	54.2663	10.936	6.72173	0.314415	0.331602	21.4539	1.26878	0.0818137	0.795534	24.8269	25.8306	19.292	5.9681	7.42307	39.2435	8.68904	0.390724	13.3115
TCGA-B0-5075-01A-01R-1334-07	-0.371726	1	299.785	2201.65	2501.44	0.563509	1	0	2.08354	10.6305	18.1896	0.0702835	1.02702	0.115123	4.00954	23.2337	2126.84	0.784007	0.55781	1.71205	0.554461	5.04479	9.07406	4.08099	9.65745	10.6516	2.3021	14.1345	124.666	19.6825	1.81534	27.6056	11.9535	8.99126	0.185497	0.415452	56.4767	5.22479	0.156871	0.510728	82.8134	15.693	29.1287	16.2853	14.3139	9.07906	38.0988	1.86125	22.2078
TCGA-B0-5083-01A-02R-1420-07	-0.0501135	1	1289.69	1790.57	3080.26	0.491371	1	0	0.859502	8.41409	16.3675	0.288987	9.17746	0.194755	3.69153	15.8696	1308.15	0.450023	2.46732	1.17902	0.233313	14.3325	2.55193	1.72122	2.8295	7.99879	3.68109	12.1844	78.6858	11.3439	0.414678	0.374519	9.29984	6.03872	0.658107	0.418805	39.7125	3.27549	0.156774	2.05798	66.4971	6.58454	6.15703	8.7737	11.0887	53.1452	16.817	1.11372	3.29949
TCGA-B0-5088-01A-01R-1334-07	-0.0507251	1	1112.66	2087.09	3199.75	0.476019	0	0	1.34241	6.0652	12.0342	0.297104	7.27635	0.682091	6.22857	14.9691	1696.95	0.927498	5.16162	1.56323	0.927144	67.2855	12.6511	4.9574	4.43683	7.8915	3.8823	15.3219	55.8891	9.39554	3.19808	54.0744	12.2907	8.964	1.16798	1.50855	37.6808	2.52611	0.675673	2.17146	83.4769	20.6122	18.7478	12.7243	17.8142	59.8435	16.5385	1.83904	11.0403
TCGA-B0-5094-01A-01R-1420-07	-0.323759	1	-180.397	907.869	727.472	0.757206	0	0	0.45923	5.77672	6.15345	0.163763	0.676288	0.173744	2.2363	7.13064	810.84	0.378324	2.78121	1.19122	0.307549	29.6413	7.16798	2.69926	4.01314	3.68719	1.94832	5.52906	13.3392	5.40189	1.16382	2.37114	10.6331	3.59167	0.214549	1.04248	16.3971	1.56564	0.861072	0.247767	31.1283	36.6565	13.3813	5.6256	8.34357	48.1845	8.81281	0.851831	10.2426
TCGA-B0-5096-01A-01R-1420-07	0.0174884	1	954.882	1869.25	2824.13	0.52376	0	0	5.7113	9.9434	18.8961	0.121729	3.25464	1.43003	1.8459	18.1644	831.26	0.302002	4.25012	0.886485	0.267656	26.5839	11.2572	1.5483	13.2847	9.46934	5.88074	5.68701	44.4829	17.5174	0.465307	0.906806	21.1942	7.03899	0.252087	4.11326	56.0187	4.46737	0.155044	0.376901	74.694	9.13674	13.6558	11.8335	12.794	338.773	49.8774	1.72156	11.5572
TCGA-B0-5098-01A-01R-1420-07	-0.0329069	1	-1427.18	-686.127	-2113.31	0.956867	0	0	0.816706	0.464861	0.640935	0.0344478	0.331576	0.135474	0.639924	0.691514	153.703	0.0574751	0.737344	0.167494	0.273663	10.3397	4.85892	0.103132	8.14105	0.510192	0.887969	1.42431	3.23638	1.17465	1.20344	1.12686	21.6673	0.611412	0.082867	0.185917	2.70082	0.333725	0.156977	0.101241	7.58895	11.9945	11.1701	3.28091	1.95508	23.4308	1.05404	0.261052	5.98109
TCGA-B0-5099-01A-01R-1420-07	-0.0346649	1	-101.719	-2.68874	-104.407	0.831129	0	0	1.5915	1.39205	11.6401	0.0375795	0.937099	0.121771	0.988206	1.88029	342.911	0.183399	0.610062	0.141767	0.106492	3.25621	6.26065	2.52139	5.23245	1.00915	0.70103	1.39635	7.93155	1.59248	0.251992	53.9243	12.3401	3.35629	0.0935647	0.354934	4.57539	0.428435	0.0963273	0.191155	9.0255	25.2834	6.30324	4.63199	1.88959	9.77331	1.8672	0.123224	11.1072
TCGA-B0-5102-01A-01R-1420-07	-0.33795	1	60.8605	1159.54	1220.4	0.708004	0	0	1.58173	4.79535	14.9372	0.13734	2.00841	0.253728	2.603	8.65954	963.215	0.230496	2.17711	1.01793	0.246547	11.62	29.8286	6.50284	5.70127	2.96972	3.68822	6.87538	25.908	7.36596	0.71027	72.8555	9.83276	4.30241	0.202894	0.436021	20.3328	1.34508	0.177501	0.435601	37.5667	20.477	24.4083	9.32222	7.3243	80.0667	9.36408	0.607521	11.2659
TCGA-B0-5104-01A-01R-1420-07	-0.19903	1	296.493	1136.74	1433.23	0.6856	1	0	1.60393	8.08185	19.2341	0.0832827	2.54502	0.1472	1.94903	8.76548	813.573	0.341071	0.114715	0.811155	0.336679	14.1949	9.95719	6.25611	6.63211	2.64265	5.28996	4.61786	23.4325	8.24047	2.81485	20.3535	9.40174	4.70824	0.478639	1.39953	14.4797	1.73394	0.177436	0.754836	28.8326	16.1774	16.5146	6.2403	8.78045	12.8442	3.95325	0.331014	8.61727
TCGA-B0-5106-01A-01R-1420-07	0.122229	1	860.544	2121.75	2982.3	0.503844	0	1	3.03787	12.5752	28.4263	0.429422	2.3816	0.581406	4.60876	19.0624	1676.95	1.12845	23.2584	1.40643	0.723326	24.9496	19.1161	4.41206	7.30064	9.04377	4.07155	10.8416	35.2833	18.7807	3.31581	53.7332	16.1395	9.69521	0.524019	0.974456	38.3883	3.77607	0.443153	0.417009	44.4465	33.5611	17.6471	11.6566	18.448	127.378	11.6598	1.5105	11.305
TCGA-B0-5109-01A-02R-1420-07	-0.0126389	1	346.043	2108.09	2454.13	0.569231	1	1	1.43692	11.7118	10.8336	0.5529	4.38497	8.16936	9.49447	8.3243	944.611	1.30687	4.26624	4.18702	3.06218	812.049	2.52737	0.978735	7.11553	3.6887	11.2448	29.6806	52.263	20.9544	1.87664	2.16198	13.8722	10.2576	2.06157	3.08075	47.6986	3.36832	0.644884	1.05206	76.5898	16.6197	19.247	10.8634	21.5921	1482.05	8.44257	8.8903	6.42746
TCGA-B0-5116-01A-02R-1420-07	-0.14988	1	519.056	494.01	1013.07	0.729166	0	0	0.979077	2.87325	6.55829	0.0786464	1.08487	0.0261377	1.61096	3.44484	311.262	0.157463	0.274262	0.5736	0.0533357	5.88124	11.6115	7.66356	7.3845	1.55507	1.11442	4.24271	6.53306	3.19632	0.227875	53.3727	16.3076	3.3983	0.261083	0.282974	9.2259	0.768181	0.217593	0.426719	11.6289	43.0451	6.18361	5.82742	4.03247	1.0489	2.33418	0.267435	9.26999
TCGA-B0-5399-01A-01R-1503-07	-0.0523611	1	873.334	1805.69	2679.02	0.541786	0	0	2.80338	11.6787	20.7447	0.504232	12.1254	0.426233	7.64136	12.4591	1565.04	1.73819	1.60391	2.2297	0.894607	18.3314	20.6376	10.0084	6.13154	4.26589	3.51563	25.6521	31.2621	12.8303	0.738302	19.4372	10.5298	6.43118	1.86439	3.171	28.9597	2.43715	1.42576	3.68449	45.62	40.4832	31.143	12.8261	20.5329	28.5955	5.35685	1.14252	16.8784
TCGA-B0-5692-01A-11R-1541-07	-0.210481	1	175.988	2369.05	2545.04	0.55821	0	1	5.84796	15.9215	26.798	0.690585	1.08379	0.24947	15.5751	13.2997	3738.99	1.57804	5.69751	6.56963	0.85522	62.6803	24.4844	4.74503	10.8188	5.23319	6.185	58.0474	50.203	22.6794	0.618926	72.6985	9.43728	12.0852	0.667394	1.71503	45.7892	4.71918	0.410475	0.885833	86.055	39.7468	99.0918	17.4433	43.6861	37.9224	1.68362	17.8181	32.3378
TCGA-B0-5693-01A-11R-1541-07	0.357697	1	659.417	574.087	1233.5	0.706645	0	0	3.31666	3.30982	9.12788	0.0607237	1.79053	0.0706342	1.40632	5.73418	801.758	0.0759869	6.00232	0.320708	0.0617716	1.40467	16.5423	4.61423	10.8743	2.1209	2.12825	2.00562	16.9159	3.46711	0.294079	0.940283	11.7338	5.18834	0.127086	0.368697	10.901	0.981116	0.266833	0.154441	21.2114	30.0423	14.4755	4.70922	4.19787	25.3489	7.40209	0.274336	9.91557
TCGA-B0-5694-01A-11R-1541-07	-0.332558	1	788.698	1461.94	2250.63	0.593533	0	0	1.30749	6.06299	17.2087	0.10926	1.11747	0.0640801	2.16332	10.4136	963.698	0.173719	4.04826	0.707978	0.190536	5.08308	17.7087	7.37787	4.87256	4.11275	2.25838	5.23618	26.1606	10.0915	0.363932	4.15661	12.3992	5.29405	0.311692	0.849843	25.1546	1.75488	0.734291	0.771543	46.807	34.4989	14.8196	7.17547	11.3219	27.2582	5.6449	0.393393	8.5303
TCGA-B0-5695-01A-11R-1541-07	0.195461	1	495.951	903.135	1399.09	0.68924	0	0	1.83802	5.04745	15.1647	0.145995	1.37939	0.134365	2.41643	4.31844	938.057	0.292306	1.71779	0.739993	0.10445	22.6635	15.9037	3.79131	4.37948	1.78846	2.71205	5.95126	12.8248	4.96942	0.278911	2.05968	11.7819	4.75138	0.213964	0.393973	13.4803	1.08548	0.328991	0.350369	18.7638	16.2876	16.7408	6.1316	7.6031	17.4343	3.47834	0.726676	6.64702
TCGA-B0-5696-01A-11R-1541-07	-0.0466454	1	523.338	1004.66	1528	0.675407	0	0	1.79078	3.60589	14.0865	0.036778	0.882521	0.0305574	1.91842	7.589	1565.52	0.159544	0.371498	0.530307	0.199534	6.24201	16.149	3.95516	6.01666	2.18069	1.95705	4.45399	18.9738	6.57675	0.170501	46.1905	15.9608	3.45781	0.159251	0.165411	14.1633	1.1193	0.119711	0.19955	28.9457	28.3738	25.7743	5.62171	7.4778	17.2331	3.92438	0.571715	23.2248
TCGA-B0-5697-01A-11R-1541-07	0.0526437	1	550.355	2279.35	2829.7	0.523064	0	1	3.08733	20.4281	44.1101	0.28513	3.77421	0.235656	7.73882	17.9513	2673.77	1.62249	4.98607	2.4683	1.2169	25.9482	9.75384	5.14431	6.90225	7.04759	6.45912	23.4857	75.5406	21.9631	0.65968	18.7861	18.7428	10.8621	0.72778	1.26552	50.6657	5.85684	0.472593	0.98472	82.5728	21.933	37.2216	14.4267	26.3249	59.4731	7.79519	4.52056	20.4616
TCGA-B0-5698-01A-11R-1672-07	0.0798057	1	485.375	2150.95	2636.33	0.547042	1	0	2.23083	17.3451	33.2807	0.393743	6.02484	0.727065	4.58202	16.7903	1986.6	0.723985	5.54842	2.0674	1.86373	174.881	7.48001	8.0266	6.93272	7.10573	6.5084	18.6667	67.4532	18.1084	1.25727	12.3523	11.0184	12.3501	1.19693	1.09506	52.4452	3.37062	0.12947	1.71673	75.409	26.9566	32.6377	11.187	15.9516	211.554	12.158	2.12899	8.76453
TCGA-B0-5701-01A-11R-1541-07	-0.210732	1	215.193	1621.73	1836.92	0.641284	0	0	0.81018	9.77937	26.5831	0.378338	3.55869	0.534961	4.19665	11.8	1200.12	0.495816	2.41209	1.44283	0.815718	115.379	9.5374	10.9327	5.78837	4.11513	5.01158	12.3597	38.5198	10.58	0.246009	164.108	17.0062	5.83472	0.905492	1.72635	32.4004	3.27903	0.161212	0.82578	36.6167	18.0846	30.7294	7.85512	11.4913	98.6423	13.5228	2.11726	9.33044
TCGA-B0-5707-01A-11R-1541-07	-0.0321619	1	-264.251	747.947	483.695	0.780089	1	0	0.895677	3.05114	6.56572	0.129501	2.04037	0.224551	1.05357	6.72176	715.088	0.202917	11.4195	0.66271	0.0589129	44.7402	6.84086	2.76935	3.55215	3.14134	3.11665	2.93828	28.2944	6.58031	0.604088	6.18226	21.6159	2.15228	0.297439	1.86887	15.712	1.12073	0.428853	0.355142	40.6601	20.8653	15.8626	7.78803	8.96566	100.925	2.97216	1.51639	10.1323
TCGA-B0-5711-01A-11R-1672-07	-0.0440587	1	830.261	1613.74	2444	0.570453	0	0	2.79914	12.9603	25.0246	0.236412	5.16278	0.523801	4.79892	9.93319	976.363	0.907226	1.56358	1.83655	0.206135	15.1603	20.7432	7.86054	9.51785	3.51143	3.55189	12.744	39.3381	14.0529	0.182665	29.624	13.776	8.40776	1.06159	0.437125	26.9394	2.50755	0.448883	2.1735	40.5644	8.00626	18.4194	8.90954	12.331	124.123	5.24851	0.803913	13.7742
TCGA-B0-5712-01A-11R-1672-07	-0.26548	1	-77.3316	735.935	658.604	0.76377	1	0	2.35851	3.97304	8.85	0.099619	1.02523	0.0323881	2.39303	4.42969	1057.55	0.299181	0.093751	1.05226	0.483402	3.2912	33.6846	8.39536	5.71147	2.73392	1.07535	8.45935	10.6499	7.21034	0.200078	61.4377	10.1098	3.58539	0.303824	0.140257	13.5184	0.854672	0.0507533	0.837207	18.9195	28.8697	35.5594	6.84125	6.94288	5.51086	2.07975	1.4619	23.3247
TCGA-B0-5713-01A-11R-1672-07	0.103951	1	534.777	1364.55	1899.33	0.634228	1	0	5.4095	8.52496	13.6131	0.114494	1.48752	0.103584	3.43217	8.49236	1143.35	0.318383	0.119323	1.1006	0.288401	8.02928	24.2413	10.1111	12.4034	2.94663	2.90531	6.93754	31.4062	10.8272	0.417047	9.81357	11.2303	6.44486	0.31582	0.560716	19.4532	2.05177	0.260872	0.612591	35.176	23.525	27.6494	7.1618	10.9364	25.9589	7.31673	1.04564	25.9258
TCGA-B2-3923-01A-02R-1325-07	0.0250885	1	-676.905	47.8787	-629.027	0.871446	1	0	0.512697	3.10248	8.93969	0.0394338	0.539569	0.0505502	0.679877	3.92006	673.865	0.101511	0.402389	0.297524	0.0884152	0.690146	1.49891	0.520426	2.20105	1.17668	1.51328	1.02955	11.3887	2.66365	0.478485	0.108756	7.19652	1.61289	0.126843	0.15202	7.23928	0.786858	0.264047	0.240705	13.6324	8.59606	3.96602	3.47815	2.20196	1.84826	3.69743	0.0591108	3.5069
TCGA-B2-3923-01A-02R-A277-07	0.086758	1	-624.481	-45.5378	-670.019	0.874382	1	0	0.98309	5.83555	15.1329	0.143551	0.66876	0.0618042	0.765814	4.94876	320.897	0.0587891	0.395461	0.403693	0.182061	0.627363	2.43166	0.993503	1.38874	1.34798	1.77936	1.00573	15.1654	0.838256	0.52505	0.0157462	3.9828	0.79922	0.0395554	0.264122	9.61446	1.66747	0.057345	0.0663818	5.48026	7.56056	4.0912	4.75227	1.54515	2.34966	6.19159	0.0912891	4.3448
TCGA-B2-3923-01B-10R-A277-07	-0.212787	1	382.243	-118.879	263.364	0.799913	1	0	1.26941	6.50424	28.8511	0.351656	2.83184	0.147257	0.622975	4.86713	141.179	0.211222	0.822059	0.509416	0.0245296	1.46149	2.79573	2.20789	2.36978	1.21132	1.12593	0.712368	9.32312	6.47526	0.146723	0	2.99331	2.18952	0.146178	1.21466	11.3506	1.51692	0.12362	0.715504	8.57723	4.58909	1.3881	4.7007	0.736645	2.36377	4.59822	0.122996	1.14581
TCGA-B2-3924-01A-02R-1325-07	-0.304993	1	737.46	2689.89	3427.35	0.446378	0	1	7.21481	27.4367	58.7587	0.879454	5.74345	0.87924	14.271	34.3434	4125.13	2.39586	2.8814	5.22854	3.50309	185.062	15.1479	9.86592	13.0275	10.0182	15.3284	49.6711	113.51	23.2204	0.508444	30.9413	7.41195	14.8188	1.00716	0.804049	65.9596	6.44377	0.225254	1.11471	134.118	31.7863	79.656	19.2793	27.1664	263.196	28.5438	12.1612	20.5431
TCGA-B2-3924-01A-02R-A277-07	0.077767	1	708.345	2470	3178.34	0.478781	1	1	9.03143	41.8159	83.7246	1.11778	6.25761	0.275338	17.1666	31.1631	2097.47	2.44861	1.99249	5.71496	5.02221	153.07	19.7608	18.0148	8.17842	10.0776	12.3103	46.1845	127.303	8.02459	0.548679	31.3217	4.46517	7.8254	1.18439	0.461328	61.4255	10.6097	0.115571	0.374593	61.0232	27.5502	82.6898	16.6917	14.5621	176.473	40.3872	10.0499	19.7042
TCGA-B2-3924-01B-03R-A277-07	-0.0653635	1	753.388	1712.32	2465.71	0.567834	1	0	8.76455	32.4663	53.759	0.839944	6.36666	0.521974	4.44617	25.0409	889.477	1.41678	0.348672	2.96898	3.43113	6.44137	12.0246	22.8241	14.059	5.87131	5.40116	19.1535	43.4938	17.2657	0.565802	6.24742	3.52309	15.297	0.886831	0.279447	34.6439	9.90684	0.0337068	1.33443	29.3442	15.9244	23.2076	12.6562	5.99078	18.5989	30.7125	4.1049	7.70448
TCGA-B2-4098-01A-02R-1325-07	-0.248503	1	68.5725	1693.13	1761.7	0.649717	1	0	0.730298	7.25133	7.50258	0.351456	3.43058	3.16694	2.09254	16.8405	760.256	0.497882	3.45918	0.92059	0.647585	141.202	5.18162	3.66715	1.85703	7.86106	5.34397	5.82595	52.006	11.7609	1.81817	3.18448	11.8686	6.97161	0.855667	0.966313	39.0601	2.67219	0.174835	0.661128	70.9531	9.6433	18.7299	12.2529	7.85147	803.712	47.3866	0.95094	6.14008
TCGA-B2-4099-01A-02R-1188-07	-0.382092	1	553.298	2136.6	2689.89	0.540443	0	0	2.59618	10.3863	40.0066	0.109988	1.65005	0.0747692	3.98554	39.5703	1857.06	0.810787	1.02803	1.42583	1.02005	8.69102	27.8146	10.4795	6.11544	7.79989	6.89126	13.0669	92.5066	19.2412	0.849277	32.5382	10.1219	9.23892	0.81396	0.984858	50.6682	2.10926	1.06914	1.73945	91.1301	35.3934	57.1275	11.5753	17.3825	24.0838	8.62622	0.524587	23.2354
TCGA-B2-5633-01A-01R-A277-07	0.0425899	1	913.535	1779	2692.53	0.540118	0	0	6.60074	36.8958	72.6946	0.643498	6.15381	0.0422098	8.08742	23.6145	205.166	1.05106	0.0244362	2.00168	0.334684	12.2375	33.6711	7.72793	3.52319	6.97342	5.68237	10.254	101.574	3.24308	0.159816	10.3117	4.66925	2.37666	0.611049	0.624533	53.8368	12.7413	0.38033	0.367525	7.33863	24.7086	6.47387	8.12071	4.66126	50.3646	16.9447	0.62191	13.6424
TCGA-B2-5633-01B-04R-A277-07	0.0107317	1	1262.88	1814.12	3077	0.491788	1	0	3.38658	30.7309	44.8434	2.97532	15.9605	0.272315	3.22998	39.1095	523.413	1.67543	0.0503135	2.61314	1.56062	7.17331	15.1174	11.5323	7.85824	9.60932	3.84739	14.0496	61.5146	17.7719	1.12572	4.73992	9.16418	16.2523	2.00295	0.37636	42.3894	13.297	0.238332	1.67898	34.0087	14.9631	5.24509	14.0904	8.24776	12.8345	66.7394	1.23985	5.41983
TCGA-B2-5635-01A-01R-A277-07	-0.0447695	1	671.944	1936.14	2608.08	0.550508	1	0	10.8464	39.4127	92.6275	0.896475	4.68439	0.0249824	8.29832	27.4142	512.853	0.702349	0.060262	2.94079	0.69913	7.14966	39.7029	17.904	9.60541	7.80214	5.40889	14.5165	57.6862	3.54683	0.356782	44.3556	3.58073	3.62605	0.73778	0.4057	58.6687	13.779	0.35886	0.56647	14.0938	21.6201	30.0138	10.4555	13.0714	8.19856	18.1314	2.12282	26.4487
TCGA-B2-5635-01B-04R-A277-07	-0.174495	1	840.591	2066.37	2906.96	0.513365	1	0	9.17525	45.7477	95.8301	5.88696	11.9801	0.137732	5.01215	39.6245	536.151	2.01054	0.0920032	3.60784	2.13104	4.1856	20.9329	26.2236	14.8981	7.676	4.28174	20.3329	40.0101	17.9742	0.728386	14.6935	4.01927	16.7792	1.64724	0.200728	57.0582	15.9915	0.124518	1.70806	15.2414	13.8517	12.8138	13.6153	12.4445	4.42173	30.6957	1.52384	13.516
TCGA-B4-5377-01A-01R-1503-07	0.018572	1	545.094	1531.44	2076.53	0.613905	1	0	3.60963	14.8431	39.6539	0.220145	5.52676	0.124711	3.57128	14.8889	1187.85	0.591027	1.04687	1.5905	0.692189	11.1366	20.5381	10.8406	12.6976	4.90752	4.67916	8.29929	46.5754	11.5458	0.352895	77.6912	11.3947	8.98301	0.485285	0.486056	32.2633	4.04574	0.127027	1.08587	43.1984	29.1572	22.2504	7.9327	12.7972	21.0862	24.6523	1.66247	14.8491
TCGA-B4-5832-01A-11R-1672-07	-0.117087	1	1213.19	1408.19	2621.39	0.548877	0	0	6.04517	24.9945	66.2667	0.537663	5.15018	0.341134	0.409759	16.9796	251.621	0.0209706	0.136026	2.89758	1.10809	3.16188	23.4756	15.8968	6.37314	1.8807	6.03451	11.0086	66.0878	44.4907	0	1.44913	2.02158	8.80568	0.955432	0	21.5703	1.00335	0.0204555	0.710369	29.0818	6.9466	2.68904	11.4372	0.810853	31.0113	8.99721	0.0854795	12.3517
TCGA-B4-5834-01A-11R-1672-07	0.254619	1	892.654	1137.34	2029.99	0.619284	0	0	4.76641	5.74812	22.1205	0.21268	3.18812	0.102238	1.97218	8.17324	846.57	0.330772	1.05223	0.424087	0.324526	4.94723	21.8144	3.85941	8.38256	2.16238	3.56042	5.17641	27.1815	8.76189	0.0848894	6.41547	14.7678	6.11519	0.394679	0.338207	20.332	1.47814	0.311521	0.710922	21.8621	29.665	26.8382	5.79386	6.32711	7.65857	10.4877	0.464924	8.93474
TCGA-B4-5836-01A-11R-1672-07	0.173681	1	1015.16	1610.05	2625.21	0.548408	0	0	4.96406	11.5484	26.6201	0.109726	3.42683	0.357657	2.84569	12.7329	1222.59	0.481629	1.16012	1.24181	0.0956742	29.7124	19.1536	8.71625	13.2707	4.68783	6.9566	8.48413	27.7652	10.6174	0.169795	9.55282	20.5966	7.61159	0.511669	0.30749	38.1205	2.41599	0.457435	0.721293	36.1247	28.8213	23.5202	6.1979	10.6887	142.649	13.3826	0.745425	17.8825
TCGA-B4-5838-01A-11R-1672-07	-0.0284136	1	829.909	788.215	1618.12	0.665592	0	0	0.764075	6.56816	13.685	0.181177	2.49482	0.110964	1.49592	7.05222	729.473	0.217648	1.06444	1.07795	0.117353	10.9575	7.03188	6.13046	6.53611	2.94022	2.92154	6.47415	21.2106	7.25045	0.115704	51.8786	19.0788	4.18468	0.291388	0.0698449	17.2422	1.53664	0.13648	0.684611	24.1998	14.5027	7.51919	6.76445	3.79135	15.9065	4.73746	0.678956	8.30181
TCGA-B4-5843-01A-11R-1672-07	-0.220102	1	787.926	694.379	1482.31	0.680338	0	0	3.8971	4.59301	17.6151	0.117633	2.05832	0.0773008	0.941318	9.1926	550.074	0.17664	0.081015	0.371148	0.0372975	4.83412	22.8359	12.4634	7.07237	3.01499	1.98039	2.24873	23.667	7.73725	0.0876438	8.21932	13.1012	3.70848	0.148176	0.0721448	16.1658	1.51516	0.156638	0.348137	23.6023	13.1185	10.4951	6.66668	3.53472	8.30071	14.3097	0.0374033	11.4282
TCGA-B8-4143-01A-01R-1188-07	0.240675	1	754.511	2436.74	3191.25	0.477116	0	1	14.2629	15.8936	18.59	0.866618	3.78086	2.87353	8.11186	29.6536	1290.11	2.43144	12.563	6.06536	4.54375	165.186	25.1129	4.11615	26.3407	10.2427	7.86662	32.2262	49.9037	14.3641	2.40433	132.977	26.4067	12.5556	1.32819	3.21558	48.7231	3.71689	0.467662	0.684433	105.785	20.6445	44.6334	14.5847	21.8095	435.981	26.0604	11.0775	41.0997
TCGA-B8-4146-01B-11R-1672-07	-0.321342	1	647.708	1592.71	2240.41	0.59474	1	0	8.19337	30.998	75.3101	0.569797	11.7312	0.117716	1.69942	15.1633	636.628	0.13875	0.200001	8.42771	1.87988	2.67473	35.3145	49.2208	8.85756	2.3208	4.48504	16.2877	81.6658	27.4226	0.114739	18.9035	2.70868	9.13787	0.560133	0.0692622	30.7021	2.0141	0.0451137	1.00268	58.5872	10.499	16.1917	14.7623	2.90259	6.53134	16.9374	0.430907	17.2285
TCGA-B8-4148-01A-02R-1325-07	0.280955	1	554.258	2439.27	2993.53	0.502418	0	1	7.26516	24.7469	47.3412	0.914552	6.44927	0.710842	10.5616	21.4927	2719.55	2.80569	3.29928	3.99915	2.93248	20.7094	16.5899	9.83342	22.5511	8.81758	9.85945	38.8352	52.354	21.9329	0.637437	28.5009	9.37434	15.794	1.17524	1.10129	52.4451	6.58298	0.302486	0.930407	59.0783	24.7096	50.8947	15.9895	27.9443	38.5593	14.9039	9.32114	23.3333
TCGA-B8-4151-01A-01R-1188-07	-0.321692	1	192.503	858.428	1050.93	0.725351	0	0	4.52106	3.96296	19.2774	0.0557688	2.34416	0.0361422	0.845951	11.9662	1028.74	0.100493	0.0120713	0.580663	0.593246	5.48307	38.8041	7.70899	11.5795	2.32975	3.10212	2.38228	20.9542	5.39325	0.116344	51.6789	8.26272	3.96188	0.149719	0.316038	16.8213	0.993298	0.163374	0.442538	29.4295	11.6592	25.3292	6.56893	7.17875	11.1122	3.50072	0.438883	28.053
TCGA-B8-4154-01A-01R-1188-07	-0.462805	1	644.559	1914.09	2558.65	0.556552	1	1	2.74331	9.40838	30.4135	0.151564	2.92031	0.0545689	4.09279	20.7709	1092.45	1.16325	0.756366	2.78259	1.15267	5.76496	27.1851	12.7845	4.9405	3.38448	3.54705	14.6655	47.3789	12.5675	0.17566	48.7871	8.2542	4.80006	0.557837	0.488528	34.0928	1.22682	0.666003	0.942279	59.2719	22.1737	33.8655	9.65304	12.8039	9.43317	5.19449	1.03814	19.7493
TCGA-B8-4619-01A-02R-1325-07	0.0298387	1	-214.556	87.1886	-127.367	0.832998	1	0	1.01266	2.15199	11.0414	0.115558	2.29999	0.108014	0.815666	2.94168	184.023	0.0867622	11.4537	0.196171	0.184724	16.1132	2.97129	0.21005	3.01389	0.842506	1.32607	1.46307	7.65834	1.77835	0.222419	0.0929541	4.81795	1.39575	0.150111	0.259864	6.59824	0.487482	0.0846309	0.352683	9.71283	7.09351	7.85734	2.45328	1.51659	20.6904	4.5964	0.143147	1.96826
TCGA-B8-4620-01A-02R-1325-07	-0.0599706	1	1215.72	1813.31	3029.02	0.497907	0	0	9.86609	9.98588	27.6307	0.212668	4.82805	0.0947401	1.8537	17.6441	838.543	0.421268	0.254648	0.792038	1.17572	3.67688	30.9075	1.29275	29.9595	6.29465	17.1274	5.79865	44.923	12.0619	1.34178	28.0736	11.8505	9.30869	0.513333	4.32252	36.1591	3.05238	0.43743	1.44544	54.5929	32.4638	12.3612	7.73697	11.3572	6.66239	32.251	0.743836	28.3304
TCGA-B8-4621-01A-01R-1503-07	-0.290808	1	-206.662	1359.01	1152.35	0.715024	1	0	1.40096	8.01173	19.8392	0.145552	2.0618	0.569861	1.35608	13.299	723.084	0.223895	0.384207	0.605334	0.272395	11.3463	8.83123	7.50666	5.37642	5.62804	4.05535	4.64321	75.8508	15.4365	0.523711	1.83332	18.7892	4.30297	0.279768	0.143699	35.0576	3.08309	0.135197	0.411721	49.2577	16.5472	12.0906	7.53316	7.89734	274.393	24.4179	0.347669	16.3851
TCGA-B8-5159-01A-01R-1420-07	-0.326641	1	505.866	1364.19	1870.06	0.637544	1	0	5.61464	9.66392	28.178	0.14947	2.59564	0.0953077	3.56393	8.62129	1199.55	0.271425	0.0451438	1.60506	0.600115	7.7677	17.9239	9.48508	8.97899	4.13345	3.05593	10.9528	29.3341	9.86149	0.321144	24.2339	9.2498	5.7957	0.0993397	0.196985	21.3462	2.81445	0.112013	0.275832	28.7413	27.0495	35.566	6.06344	10.1098	12.3224	13.061	2.23098	22.6522
TCGA-B8-5162-01A-01R-1420-07	0.355447	1	1773.07	3112.54	4885.6	0.246105	0	1	2.88117	33.3374	64.3804	0.949692	18.4356	11.8292	11.2527	62.9591	2856.92	0.932697	1.18856	5.61001	1.20874	401.946	4.8841	4.92035	11.4045	18.7077	11.3884	39.6324	180.953	45.9363	0.824951	10.2207	24.2092	19.9706	2.19448	2.38059	124.487	12.4599	0.369189	1.44694	194.88	19.6755	33.6318	19.493	34.3387	2039.36	236.17	3.73098	14.8067
TCGA-B8-5164-01A-01R-1420-07	-0.0286774	1	721.37	2835.65	3557.02	0.429266	0	1	4.64777	40.5093	81.6202	0.797067	13.1071	0.215756	17.0196	31.8987	3417.17	1.84138	0.640144	8.48461	0.943425	14.9837	15.4264	12.1629	12.676	10.5649	8.88589	46.4973	158.453	34.9946	0.682541	13.4469	10.3431	17.2856	1.32432	0.437969	84.5218	11.96	0.126787	1.65112	108.316	22.3302	51.3036	20.8519	38.3533	23.7814	40.4645	7.49313	18.0991
TCGA-B8-5546-01A-01R-1541-07	-0.237708	1	-677.703	-149.094	-826.796	0.885316	1	0	1.1166	2.4996	13.5433	0.0600825	1.27557	0.0778756	1.35045	1.56496	806.097	0.270664	0.351135	0.362653	0	1.96596	7.67061	1.24888	5.34382	0.699043	1.87482	3.13542	5.012	2.01542	0.438699	0.971435	9.63932	1.21733	0.1613	0.0648541	6.1298	0.513524	0.0880052	0.550117	8.80205	2.2151	4.34561	2.76418	3.58884	3.12514	2.23921	0.15761	17.5608
TCGA-B8-5551-01A-01R-1541-07	0.0480525	1	964.417	3144.29	4108.7	0.354799	0	1	6.67442	33.0693	67.3955	1.73393	4.843	8.63874	15.006	53.1236	4064.81	2.69783	4.6575	5.13837	2.88714	2267.44	7.72248	5.32743	31.849	18.5691	10.6922	34.0511	145.616	33.3609	1.20628	7.62501	30.2864	22.8213	2.39262	4.24219	125.179	17.0899	0.489592	0.988262	198.871	31.3884	41.181	24.9669	49.4857	851.989	188.622	12.586	23.0981
TCGA-B8-A54D-01A-21R-A266-07	-0.010643	1	390.057	2478.21	2868.27	0.51823	0	1	3.60646	25.0349	27.33	0.514232	5.72697	0.327259	10.3213	25.2502	1967.56	0.85433	0.355233	5.33269	2.34682	60.7757	12.2321	12.0075	8.3732	9.31169	4.72031	37.221	76.6986	28.4628	1.7934	60.225	10.4955	13.3509	0.729583	1.2991	60.071	5.28445	0.512827	0.734631	72.3806	15.7667	43.2802	21.5117	30.6919	77.8341	20.4786	16.3404	19.5173
TCGA-B8-A54G-01A-11R-A266-07	-0.093242	1	237.149	3030.63	3267.77	0.467215	1	0	4.61065	43.3428	70.2693	0.421883	4.0285	0.0822974	15.2456	44.1002	5129.36	1.671	0.966112	6.56911	5.19261	7.98359	26.1178	14.0009	7.49552	13.1408	10.7423	78.6104	128.906	46.5288	2.08642	18.7534	8.90796	21.5434	1.49849	2.75542	97.753	11.2285	0.537346	1.28137	197.202	35.3244	78.9681	32.0969	56.258	12.5254	12.8712	25.7587	32.7848
TCGA-B8-A54J-01A-11R-A33J-07	0.249665	1	671.187	1662.54	2333.73	0.583673	0	1	2.54465	7.32031	21.0234	0.126887	2.06424	0.0866829	5.66647	10.6927	1282.68	0.649234	1.22066	1.64522	1.13095	13.2783	12.4176	3.87318	6.98458	2.97066	3.36642	11.3516	24.8242	7.68919	0.76331	32.2645	13.772	7.32473	0.468029	2.01641	27.456	2.03663	0.371711	0.334668	38.0463	24.8545	43.3051	8.72576	18.3442	30.6866	8.84992	4.0271	11.077
TCGA-B8-A54K-01A-11R-A33J-07	0.106976	1	-388.984	-128.33	-517.314	0.863286	0	0	6.28667	1.55486	11.6884	0.0375103	1.53975	0.0213709	0.575516	1.65575	154.504	0.0482798	0.19718	0.137463	0.121481	2.60931	17.4016	0.119177	3.99049	0.638187	0.603412	0.613557	6.52707	1.39594	0.0798501	0.0517253	13.741	1.61626	0.097453	0.202446	10.8578	0.370396	0.156979	0.0981273	7.41878	14.4485	5.10102	5.53289	1.97661	4.71686	2.36857	0.196796	2.6951
TCGA-B8-A7U6-01A-12R-A37O-07	0.456369	1	825.765	1433.56	2259.33	0.592506	0	0	1.08245	4.84513	15.4823	0.0474041	4.45775	0.357852	2.46687	7.92458	676.998	0.366085	26.2088	0.694881	0.495999	70.1096	10.6864	3.57411	3.26492	3.68516	5.14504	4.66725	23.0347	5.70321	1.29167	17.6495	22.3166	9.64258	0.351878	1.26094	25.9268	1.8141	0.595154	0.744057	41.9953	29.2864	19.9914	5.75415	10.9633	90.0651	20.6861	0.639523	10.7341
TCGA-BP-4158-01A-02R-1289-07	0.0293161	1	539.622	1112.32	1651.94	0.66188	0	0	2.24919	5.52401	10.9009	0.127423	2.65548	0.0533589	2.92893	9.53718	749.04	0.45922	0.0441296	1.02292	0.142214	4.91634	21.956	12.3471	6.96776	3.27558	2.05375	7.17146	18.0857	6.90255	0.577224	34.1443	12.1757	5.00737	0.485539	0.64645	17.6837	1.49694	0.283695	1.03706	25.7239	22.6687	19.0457	9.90669	7.59381	7.42313	4.92072	0.508075	10.1854
TCGA-BP-4160-01A-02R-1289-07	-0.0839123	1	1123.22	2417.75	3540.97	0.431393	1	1	3.55232	23.2149	53.9198	0.398566	7.96321	0.389742	10.0565	25.5131	1882.79	0.920764	1.41019	4.48758	1.53712	39.8066	15.0436	9.65749	8.8777	7.03585	4.61703	36.9944	97.0465	20.7053	0.605335	33.9409	8.94272	12.3219	0.384989	0.703242	71.3862	4.98582	0.0898146	0.577023	80.9237	24.2772	47.4766	13.0369	20.0816	86.0522	31.5392	6.0453	17.9631
TCGA-BP-4161-01A-02R-1325-07	-0.345571	1	639.19	2485.59	3124.78	0.485669	0	1	2.79823	24.7052	46.5726	0.676232	5.15819	0.812643	9.29721	24.4016	1645.49	1.99054	2.43307	4.1898	1.50726	80.0184	16.5744	10.8142	11.7647	9.18186	7.02359	31.2591	74.1008	27.4077	2.75608	51.9065	11.0864	12.7693	1.90425	2.27198	54.7637	5.23796	0.367339	2.44201	58.566	6.79425	24.5491	16.127	25.0132	148.972	20.6863	4.11954	19.6757
TCGA-BP-4163-01A-02R-1325-07	-0.073208	1	813.916	1711.52	2525.44	0.560595	0	0	1.68262	10.7746	17.0925	0.472802	3.49205	0.232557	3.6156	23.1249	904.154	0.511179	1.58284	1.33177	0.241855	22.5044	17.3342	6.47359	12.9679	10.4445	5.6362	8.00926	39.8208	19.8416	1.29634	3.05777	18.31	7.50592	0.540476	0.425292	39.8331	3.5402	0.203143	1.26984	63.5112	10.7722	13.8152	10.2501	17.1769	30.4189	19.4009	0.848894	23.9561
TCGA-BP-4164-01A-02R-1325-07	-0.0395839	1	-5.40789	813.041	807.633	0.749468	1	0	2.08273	6.04448	16.7279	0.0980095	1.33251	0.104699	1.78279	8.83127	761.025	0.252297	0.151531	1.53176	0.683663	6.09041	12.4611	5.88352	8.13679	2.92133	2.48842	5.00982	24.8837	8.65632	1.06405	67.9643	9.05993	3.41919	0.169755	0.207808	14.4713	1.40953	0.12305	0.356102	19.8407	28.5035	23.5057	7.15492	5.85004	10.0277	7.65359	1.04065	13.1945
TCGA-BP-4165-01A-02R-1289-07	-0.141121	1	585.467	1709.97	2295.44	0.588228	0	1	1.37571	5.45802	9.76885	0.111037	1.66979	0.10794	5.50781	6.54637	1738.17	1.00041	0.721025	1.65877	0.271087	13.2501	19.8845	3.83719	4.54236	3.17376	3.24637	14.9263	14.2676	8.75688	0.901751	16.7203	11.2848	7.25635	0.379829	1.30342	24.3144	1.08279	0.618032	0.892399	36.2384	27.9003	42.8477	6.69752	17.4786	24.0349	2.78942	2.05834	13.7374
TCGA-BP-4170-01A-02R-1289-07	-0.048124	1	1094.09	1987.78	3081.87	0.491165	1	0	3.19522	13.7437	31.3973	0.50904	6.16036	0.14662	6.52963	21.4796	1478.31	0.84932	1.44462	2.52061	0.650979	29.1141	14.6564	8.83759	9.28049	5.58056	6.33318	18.2409	52.5097	15.4876	0.736059	4.031	10.9595	7.67055	0.669415	1.14981	37.873	3.30498	0.0773226	1.33494	47.9229	29.0829	27.0953	7.94482	15.8633	71.8431	12.8418	2.47283	11.6295
TCGA-BP-4173-01A-02R-1289-07	0.105039	1	1419.63	3338.07	4757.7	0.264257	0	1	6.15107	48.2941	127.196	1.14776	14.3117	0.567956	23.7892	39.6083	4911.67	4.19747	2.43852	9.24132	6.16712	51.177	8.95752	7.78726	17.713	15.4173	22.0129	61.3724	136.421	35.3964	5.3455	35.4754	13.6547	24.9458	1.73854	1.48578	95.0687	14.1273	0.980166	1.43911	146.216	32.0716	64.0076	26.1049	52.9236	102.454	22.6504	17.5836	16.6042
TCGA-BP-4174-01A-02R-1289-07	-0.218217	1	461.484	1763.28	2224.77	0.596585	1	0	2.23214	11.3668	45.1552	0.272405	2.53432	0.0751741	3.63011	19.4556	1639.77	0.788882	0.631742	1.65889	0.322347	5.19744	10.2997	11.0577	5.38789	6.02053	6.65228	11.2893	58.4765	10.6148	0.587131	5.50542	11.5131	6.25106	0.294882	0.393801	38.2238	3.05679	0.313502	0.583947	44.4553	20.5811	35.7916	9.93581	10.9762	8.75824	19.0138	0.96128	14.5737
TCGA-BP-4176-01A-02R-1289-07	-0.179188	1	1180.11	2350.8	3530.91	0.432725	1	0	3.31505	20.7297	36.5023	0.492367	22.142	0.931407	4.80907	32.7071	1447.65	0.805364	4.07264	2.52743	1.37226	23.2198	14.5402	8.69407	10.3314	9.85098	15.829	14.7521	127.164	20.8725	1.54599	55.9184	12.0325	11.2695	1.24492	1.24563	68.073	7.39873	0.940121	2.34351	91.2602	27.4498	15.4695	16.3908	13.7934	191.02	48.1648	1.26084	15.3129
TCGA-BP-4325-01A-02R-1289-07	-0.367504	1	429.319	1826	2255.32	0.59298	1	0	3.3858	16.5012	39.2695	0.153299	1.00607	0.090317	6.8717	18.218	1471.28	0.641762	1.4781	2.7759	0.413151	7.26874	22.8182	26.685	9.72874	6.02828	3.8949	22.401	45.1491	18.865	1.86901	15.1899	8.08194	9.49745	0.297701	0.30086	40.805	3.94245	0.353825	0.59547	50.3465	24.5684	46.9605	10.5328	20.8092	14.5348	14.0217	6.27172	14.685
TCGA-BP-4327-01A-01R-1289-07	-0.0785124	1	450.075	1134.36	1584.44	0.669275	0	0	2.25069	3.17944	8.35641	0.0389141	1.12469	0.324939	2.53671	8.86271	725.246	0.379823	1.09499	0.800067	0.245996	11.4281	19.2891	2.99997	6.77175	4.16881	1.33306	5.71948	13.1471	6.20558	0.971279	42.5985	11.0034	4.93271	0.417038	0.748205	15.9428	1.33095	0.142497	0.554242	34.1195	20.0398	10.2736	8.0403	9.60997	105.875	8.84464	0.578456	9.25877
TCGA-BP-4329-01A-02R-1289-07	-0.0130232	1	1133.73	1731.9	2865.63	0.518561	0	0	2.65731	6.64661	23.8422	0.12839	5.31396	0.0720051	3.23848	17.5917	1025.31	0.28919	0.364747	1.15637	0.419804	16.2081	12.8459	3.32903	3.89028	4.30234	3.91375	9.53238	40.2296	14.0599	0.735375	1.49105	12.2449	5.44056	0.576783	0.617142	32.7825	1.55925	0.211565	1.10207	47.9766	17.5156	16.3782	7.33536	12.4061	25.1713	10.7912	0.53326	12.5633
TCGA-BP-4331-01A-01R-1289-07	0.27039	1	756.406	1908.02	2664.43	0.543585	1	0	5.08058	12.9135	33.9915	0.225756	5.38153	0.122964	5.13347	22.0963	1281.1	0.62778	3.07671	1.2554	0.422851	11.2548	18.4647	9.60901	13.1706	9.01773	4.12915	15.1153	61.5789	15.4709	0.990526	32.0923	18.0859	10.2819	0.622727	0.879974	42.1472	4.53606	0.208202	1.25043	53.0857	25.5907	26.2882	10.895	21.4657	10.6385	34.4482	1.71814	18.9989
TCGA-BP-4332-01A-01R-1289-07	0.140335	1	700.933	1107.57	1808.5	0.64448	0	0	2.17881	5.62953	13.5711	0.151147	2.50364	0.305965	2.30237	9.38615	521.724	0.536467	2.19099	0.905402	0.183708	3.5443	14.1654	6.69958	5.87148	3.703	2.08168	6.63608	41.0271	6.85659	0.477757	16.701	15.9951	4.8457	0.353021	0.469677	28.6234	1.48312	0.134177	0.605752	29.7383	20.4443	10.4729	9.85647	6.72665	6.41405	11.6431	0.368459	8.50933
TCGA-BP-4335-01A-01R-1289-07	-0.205629	1	790.231	1940.25	2730.48	0.535421	1	0	2.71861	9.27955	21.4217	0.340015	2.0696	4.36856	5.08236	13.8824	1712.57	0.951526	63.2766	3.25337	2.74909	611.022	14.108	5.23192	6.10783	4.99099	3.42828	15.6372	26.1297	16.4079	4.66362	21.9489	8.98001	9.32712	1.17113	2.56495	26.701	2.50228	0.588585	0.94339	41.0457	25.8896	26.0208	11.9163	14.0704	792.017	5.93693	3.27043	11.6482
TCGA-BP-4340-01A-01R-1289-07	-0.500631	1	-86.4263	683.89	597.464	0.769532	1	0	2.0996	4.05036	13.1805	0.0901337	0.987484	0.185349	1.5926	5.09484	1129.27	0.248136	1.1218	0.884064	0.700767	10.4133	17.9867	11.5473	6.03097	2.16927	1.77822	3.43181	13.1685	4.80457	2.71979	4.25049	7.77644	3.519	0.256937	0.374979	13.5105	1.03836	0.17603	0.252165	18.8821	15.3514	15.8504	5.79687	5.25616	18.9933	2.45777	0.617374	14.0976
TCGA-BP-4341-01A-01R-1289-07	-0.0864534	1	175.26	918.576	1093.84	0.721002	0	0	0.78258	2.91372	14.7564	0.107466	1.98964	0.0465856	1.89346	4.23571	589.852	0.182422	0.161817	0.415984	0.0733327	13.651	13.9974	3.60706	2.46621	2.47198	1.62914	2.93214	10.2222	4.10172	2.1723	0.552495	9.37567	3.67226	0.129484	0.592609	12.2246	0.817463	0.506446	0.161616	16.6647	20.849	14.8054	5.94469	6.82304	8.18829	3.83931	0.20428	6.99756
TCGA-BP-4343-01A-02R-1289-07	-0.0880959	1	1717.4	2306.82	4024.22	0.366366	0	0	2.30664	22.7051	53.9571	0.729769	12.8954	0.389243	6.24374	38.0562	1287.74	0.873606	2.0104	4.02749	0.614062	175.745	9.89353	9.62767	5.11286	9.37147	11.1955	22.7323	130.211	29.0196	0.1673	103.829	15.7927	8.73802	1.21536	0.950227	65.7164	4.31054	0.523248	1.60944	86.8383	22.6521	32.3168	16.2437	13.3203	305.259	21.181	0.633654	12.7228
TCGA-BP-4346-01A-01R-1289-07	0.0264521	1	816.194	2872.84	3689.03	0.411685	0	1	5.91489	28.9	41.8617	0.907286	6.76771	0.831249	23.3819	22.6833	3696.5	3.53488	4.92552	6.41616	4.00251	37.8895	14.7902	8.91029	19.2473	11.0053	8.88918	69.9107	56.966	30.3204	2.60163	46.9607	10.7504	21.152	1.82202	1.86604	64.8794	8.11324	0.215503	2.50461	88.2852	26.5113	64.999	24.6205	49.703	239.942	8.60544	20.3266	33.187
TCGA-BP-4347-01A-01R-1289-07	0.0111609	1	610.018	1162.75	1772.77	0.648481	1	0	3.6012	5.74626	41.8698	0.170817	4.73465	0.0771214	2.75132	9.15403	951.331	0.474288	0.516235	0.904587	0.635106	10.6808	12.3957	4.60951	7.39668	2.50381	2.64541	8.65081	19.4539	7.47579	0.518681	24.9972	13.2762	5.74216	0.474489	0.356588	14.0577	1.58716	0.207715	0.681996	24.5845	9.59539	24.1874	6.26433	6.89329	10.0068	5.31093	0.997636	11.8936
TCGA-BP-4349-01A-01R-1289-07	0.23364	1	624.007	1161.45	1785.45	0.647062	0	0	1.80989	3.80709	13.3908	0.200769	5.57686	0.119252	2.37903	8.30118	758.508	0.577302	0.684215	0.9411	0.320318	13.1228	18.7126	2.72586	6.89423	3.34007	1.89509	7.96676	11.7323	7.69042	0.330998	28.4202	11.9683	6.76476	0.591892	1.1412	16.1341	1.13573	0.287818	1.59054	26.0804	17.5985	16.2551	6.42067	9.41515	14.8353	6.13984	0.679806	10.7773
TCGA-BP-4351-01A-01R-1289-07	-0.0351946	1	524.825	1187.69	1712.51	0.655188	0	0	1.19385	4.72518	9.35766	0.167252	4.28855	0.151596	2.03142	9.2182	964.53	0.487079	0.296199	0.910098	0.636361	5.21878	11.097	8.89177	5.58872	4.15095	1.74652	6.33877	9.75421	7.73185	1.07998	32.4601	12.1005	5.49134	0.368689	0.670166	17.3951	2.21097	1.00962	0.876539	26.8426	27.7315	14.8032	8.36229	7.7088	9.08475	10.7466	1.00157	8.70014
TCGA-BP-4353-01A-02R-1289-07	0.0813085	1	1260.3	2188.85	3449.15	0.443512	0	1	2.51146	17.1073	27.3725	0.316741	8.99953	0.0441193	2.57868	37.5721	1228.89	0.559559	0.282302	2.3476	0.641705	0.4334	15.2905	7.00452	4.23676	9.437	6.6354	15.2102	75.9646	23.0548	0.638565	24.819	18.5628	11.0944	0.88341	0.339381	50.8417	4.66649	0.259262	1.72489	82.9761	29.2754	12.2987	14.2817	10.5493	2.31097	69.6816	1.50699	9.0993
TCGA-BP-4354-01A-02R-1289-07	0.272164	1	1528.45	2893.64	4422.09	0.31143	1	0	8.13095	39.3989	74.631	0.409392	16.2841	0.339101	4.55378	83.731	1411.35	0.718788	0.231759	2.47106	2.07588	72.453	11.7005	7.42673	18.5185	25.7488	17.295	13.6465	138.355	43.0412	2.76867	23.2698	22.3354	26.0268	1.25452	1.73362	136.642	9.70418	0.405919	0.794534	160.41	21.7277	25.7635	23.823	30.1591	59.2204	198.661	2.36815	17.8579
TCGA-BP-4355-01A-01R-1289-07	0.167164	1	955.692	855.136	1810.83	0.644218	0	0	2.43555	2.57956	10.0941	0.0856842	2.70948	0.132891	1.71822	7.46975	656.796	0.300219	0.0721253	0.553098	0.215832	4.00102	15.1417	2.34946	7.13243	2.95236	1.7308	3.55326	13.586	3.72866	1.71659	32.2679	14.8295	7.00396	0.234978	1.16896	9.82305	0.798694	0.11156	0.435848	27.5845	31.6454	14.402	6.61998	4.29577	26.055	6.14876	0.507811	9.34535
TCGA-BP-4756-01A-01R-1289-07	-0.379702	1	-632.206	877.911	245.705	0.801466	1	0	1.18533	4.56954	27.2602	0.114963	1.41049	0.224998	2.43735	6.92882	629.957	0.370837	0.423949	0.706757	0.356409	8.17443	5.21415	3.27612	4.61501	3.52236	1.3864	7.30348	21.7654	7.0426	0.72965	3.41132	8.30528	3.57028	0.250741	0.333212	17.3155	1.7561	0.162154	0.563121	33.7362	5.65619	14.3476	8.23121	8.82242	27.0193	4.58458	1.74987	12.5562
TCGA-BP-4760-01A-02R-1420-07	0.320489	1	476.832	543.597	1020.43	0.728426	0	0	4.31923	2.52538	17.1789	0.0661311	2.51211	0.0241761	0.649231	3.33244	417.808	0.0926839	1.39325	0.126401	0.299842	5.87972	10.031	0.354493	6.96925	1.67212	1.1544	1.62118	24.1403	4.13771	0.118252	0.127669	16.9197	3.21077	0.244353	0.261738	15.4607	0.781447	0.0129153	0.152496	20.729	19.7176	5.46487	3.99054	2.70369	9.13739	7.0294	0.0308403	5.05744
TCGA-BP-4762-01A-02R-1289-07	0.208054	1	1611.93	1912.4	3524.33	0.433594	0	0	3.15584	13.5248	40.3972	0.511939	8.13639	0.545622	5.21384	23.0749	927.037	0.503658	13.0393	2.17101	0.30015	76.0973	13.8011	8.53921	7.10296	5.0397	9.57396	15.6162	49.3605	15.7883	0.131526	1.065	12.68	6.64436	0.691771	0.690744	38.6403	3.20495	0.232714	1.21224	51.7571	14.6178	15.9388	8.99455	15.3143	171.952	26.2799	0.69462	8.94123
TCGA-BP-4763-01A-01R-1289-07	-0.130486	1	981.854	1153.21	2135.06	0.6071	0	0	5.06884	5.18503	18.6322	0.290649	1.76733	0.149644	2.61669	10.9597	741.526	0.343432	0.21658	0.826836	0.35729	11.7632	30.9498	4.56275	12.8074	2.40733	3.60708	10.6174	22.3981	13.798	0.0426003	17.1898	11.236	4.74667	0.466273	0.205725	15.3201	1.21899	0.209372	0.950077	30.1688	28.6569	15.4592	6.26921	5.1569	39.6533	7.88487	0.141655	28.8495
TCGA-BP-4765-01A-01R-1289-07	0.249189	1	805.28	1094.69	1899.97	0.634155	0	0	2.5692	5.31451	16.7921	0.11185	2.76943	0.128822	1.3281	8.59326	574.714	0.405412	0.434112	0.384118	0.228681	11.8426	14.5278	5.71907	7.75245	2.90796	3.07155	1.71549	21.4929	5.97333	0.787372	0.921431	10.2246	4.81465	0.100203	0.228975	22.7457	1.4281	0.723114	0.25112	23.8289	17.8984	9.4456	4.64123	6.34347	17.0675	11.752	0.209095	12.8004
TCGA-BP-4766-01A-01R-1289-07	0.224922	1	530.465	1158.81	1689.27	0.657762	1	0	0.881113	6.63437	13.5803	0.0820263	2.67722	0.0855004	1.95265	12.3798	601.394	0.403111	0.855456	0.421964	0.0975293	5.69521	6.49615	11.1418	6.58552	5.12871	4.91171	3.81753	33.9322	9.87908	1.28341	0.278922	13.5528	5.09389	0.226023	0.321965	22.7173	2.91617	0.262139	0.477931	39.6366	6.56206	11.4733	7.44802	8.37632	5.01242	14.2323	0.254296	6.64269
TCGA-BP-4768-01A-01R-1289-07	-0.129473	1	9.59195	711.334	720.926	0.757833	0	0	0.613684	4.13277	7.8601	0.124046	1.00034	0.0386493	2.07735	6.70899	580.978	0.337614	0.100687	0.731181	0.337999	1.83948	10.9884	17.201	4.00702	3.46071	0.925608	6.28215	17.2225	5.83759	1.35167	78.5126	11.678	3.85975	0.255134	0.167371	16.9493	1.67438	0.0454236	0.291828	29.361	32.0593	10.3845	7.20333	6.36972	1.73711	5.20684	0.799941	6.3385
TCGA-BP-4770-01A-01R-1503-07	0.146671	1	1766.27	1296.74	3063.01	0.493575	0	0	8.97472	3.93697	8.21425	0.0622172	1.67431	0.093049	1.29356	15.8085	1104.63	0.311423	0.0748169	1.35089	0.590715	7.93846	9.02794	0.362192	4.99007	5.86925	2.27907	5.5103	21.0571	9.37436	0.298737	2.19374	62.2888	3.68685	0.218517	0.671583	23.9663	0.968566	0.0708804	0.288348	122.14	12.7585	5.47422	5.42332	6.01815	24.7553	13.5481	0.31433	6.34158
TCGA-BP-4774-01A-01R-1289-07	0.0757634	1	575.488	1165.58	1741.07	0.652016	0	0	3.03594	5.15581	11.4881	0.179274	6.33819	0.131929	3.41695	7.14763	887.235	0.615319	1.71847	1.09496	0.528494	5.05051	13.7039	3.49965	9.00233	2.50265	2.77387	10.2821	15.1533	6.20705	0.947713	14.6679	12.5286	7.29766	0.465759	0.829333	16.6832	1.19608	0.237581	0.816376	26.8299	26.3089	18.3591	6.66524	11.1023	16.4635	8.11143	1.08985	13.9908
TCGA-BP-4775-01A-01R-1289-07	-0.0624268	1	398.52	1416.06	1814.58	0.643797	1	0	3.26064	11.7106	27.5923	0.513352	9.51214	0.431585	3.52114	12.5397	958.665	0.862321	0.489664	1.40485	0.955911	21.0962	11.687	15.3244	7.62757	4.27647	7.31287	9.86664	33.7991	12.1946	0.836269	32.1777	10.6363	7.06488	0.568897	0.669171	24.2414	3.04827	0.331358	0.964838	27.3955	18.4576	12.5653	8.99038	10.8236	54.0645	14.9298	1.52163	6.59664
TCGA-BP-4777-01A-01R-1289-07	-0.176627	1	988.828	2753.19	3742.02	0.404584	0	1	3.0361	24.1949	34.1705	0.936365	22.8314	0.987366	12.7708	28.2169	2017.26	3.3953	7.91099	8.67308	2.97985	145.274	11.1873	11.1378	6.76894	9.08225	16.7665	43.2405	97.4407	27.7787	1.04165	52.6274	9.22276	13.004	1.44617	1.50212	67.5537	5.58284	0.60676	2.88852	103.064	20.1761	35.5457	20.7702	33.4939	87.2221	30.1107	6.67087	16.4913
TCGA-BP-4787-01A-01R-1305-07	-0.336968	1	1542.4	2084.64	3627.04	0.419961	0	0	2.43377	13.7952	26.037	0.249302	3.73964	0.0804173	3.05259	25.7364	1415.75	0.396379	0.296262	1.32774	0.664912	7.8231	14.7224	5.83722	8.85966	10.3179	10.4983	7.9973	57.3704	17.7231	1.70449	72.5828	17.9578	8.40232	0.444497	0.936576	43.1294	4.4528	0.415283	0.915036	84.8482	22.606	19.825	11.1787	14.5288	9.66185	40.0829	0.649702	17.0053
TCGA-BP-4790-01A-01R-1305-07	0.15913	1	1371.8	2144.94	3516.75	0.434598	0	0	4.12428	17.8902	36.9277	0.88692	15.5677	0.794223	9.71103	15.7142	1351.33	1.03586	1.61165	3.43674	1.16478	61.3579	12.1407	9.98205	8.60542	6.61054	3.80297	33.8746	80.4685	23.3956	0.465015	11.5867	15.036	11.059	2.54131	1.21147	42.3102	4.65419	0.160383	3.92109	30.1506	8.65844	15.5361	13.7917	15.7984	122.932	14.2968	3.88723	7.6551
TCGA-BP-4798-01A-01R-1305-07	0.10357	1	1354.88	3103.96	4458.84	0.306299	1	0	8.16389	37.4962	74.5084	1.78366	10.4346	4.25992	13.8545	54.855	5246.94	6.57299	14.1233	4.79254	2.99938	119.249	12.4533	5.4393	20.3857	23.4227	14.402	50.1652	101.791	36.8508	1.08485	20.2368	16.998	24.7151	1.71017	1.00686	95.2866	10.6295	0.679809	1.34242	186.455	20.7628	51.2872	22.652	34.1826	585.272	50.6481	15.2225	22.2116
TCGA-BP-4807-01A-01R-1305-07	-0.224775	1	1269.58	1450.4	2719.98	0.536722	0	0	4.58361	9.99657	24.0202	0.125813	2.00259	0.0541672	1.78561	18.0026	958.669	0.154574	0.47038	0.612696	0.0598368	4.5229	19.7857	10.6983	9.55774	7.3452	3.28967	4.49542	40.8345	10.0304	0.272694	11.1232	11.2044	5.42567	0.292199	0.246918	35.6777	3.73148	0.251295	0.698151	53.2067	8.51717	8.03849	7.30169	9.37537	11.0288	46.0127	0.130014	8.90653
TCGA-BP-4959-01A-01R-1334-07	-0.0630987	1	803.085	1890.38	2693.47	0.540002	1	0	1.97527	10.9461	26.4917	0.160145	17.8997	0.17156	3.0634	15.3008	1456.94	0.542353	17.3908	1.24941	0.172316	13.2838	11.4637	9.22764	7.0122	7.64306	5.04801	12.747	74.0352	16.3237	0.507736	43.2505	14.3608	7.80439	0.56065	0.239066	47.8865	4.85504	0.28947	0.942862	79.2273	17.871	12.966	12.4488	14.5572	17.3957	43.3643	0.691222	12.4034
TCGA-BP-4964-01A-01R-1334-07	-0.21797	1	700.244	1589.07	2289.31	0.588954	0	0	1.63432	7.26553	15.9243	0.775508	7.13452	0.231962	4.72452	10.4188	1007.02	0.610727	0.850492	1.44068	0.601059	14.5223	13.2783	5.09315	6.73338	3.34705	1.90319	13.9112	25.8526	9.2924	0.441697	24.2872	11.6273	6.80219	0.788009	2.41828	28.5848	1.99688	0.323105	2.26517	32.8607	21.2593	21.1337	9.33345	10.3227	61.5886	8.56658	1.27786	11.282
TCGA-BP-4969-01A-01R-1334-07	-0.406931	1	101.396	341.125	442.521	0.783856	1	0	2.12442	1.46821	8.14377	0.0526402	1.36855	0.094875	1.12533	3.35023	1055.46	0.218896	6.78386	0.391055	0.141227	2.96387	18.702	12.3758	6.13789	1.44674	0.791079	2.15769	6.5078	2.52873	0.69993	3.65457	7.31486	2.65758	0.185855	0.469863	8.59339	0.478485	0.284692	0.230689	14.9856	16.1667	25.1304	5.35815	3.56811	17.9187	3.24484	0.361151	14.4375
TCGA-BP-4971-01A-01R-1334-07	0.27632	1	1372.29	2401.54	3773.83	0.40031	0	0	2.78661	9.64048	15.7365	0.846499	11.7789	0.288057	8.25195	11.5906	1419.18	2.00064	0.677141	2.29368	3.02938	11.3521	6.76935	5.97372	5.43866	8.78837	4.52387	21.824	41.6596	15.859	7.84803	22.1062	16.2385	11.7339	2.02074	4.12169	41.6897	3.14566	0.74394	3.87154	67.6093	21.8125	28.5684	15.9672	18.8581	13.047	5.69495	1.44819	7.6793
TCGA-BP-4973-01A-01R-1334-07	-0.204677	1	510.635	1756.01	2266.64	0.59164	1	0	2.22653	15.2826	36.6276	0.290173	8.33571	0.147835	5.05581	16.3282	1328.6	1.15876	0.434828	2.49727	1.41798	4.74217	17.7149	13.027	7.60812	4.34534	4.62029	10.3914	35.8874	11.3278	3.80126	61.775	11.8291	7.08556	0.731786	0.671179	27.1366	3.96461	0.289579	1.20028	29.6795	12.3158	23.1207	10.6609	12.0815	4.0061	9.52543	2.14136	10.8474
TCGA-BP-4975-01A-01R-1334-07	0.0634262	1	1043.99	1085.81	2129.8	0.607714	0	0	1.2899	7.3754	18.2907	0.18302	3.01295	0.214762	2.11372	12.049	765.34	0.262143	8.09976	0.633075	0.0932938	17.099	14.7513	8.72487	3.501	3.41399	3.80095	4.50112	37.7115	8.1589	0.331463	3.74393	11.8672	5.59855	0.331625	0.326725	24.5377	2.2717	0.173219	0.446863	32.3519	17.6061	8.05797	7.39265	6.38554	48.736	15.8875	0.251131	8.89668
TCGA-BP-4976-01A-01R-1334-07	-0.215469	1	496.907	833.269	1330.18	0.696533	0	0	1.29907	5.81215	20.3795	0.124583	4.02266	0.0878586	1.48034	7.57131	797.613	0.164263	0.13812	0.403499	0.0741854	45.2414	19.1995	8.44743	6.7449	2.43299	1.84688	4.62331	30.1303	7.20545	0.140366	26.2733	9.9304	3.80404	0.210518	0.180397	18.0173	1.99053	0.329358	0.370956	24.74	18.9023	19.1216	4.89059	5.89018	20.9843	14.7529	0.377294	7.39608
TCGA-BP-4977-01A-01R-1334-07	-0.308944	1	487.28	1495.71	1982.99	0.624686	1	0	4.40851	8.48544	19.7406	0.411493	3.53754	0.100859	4.63206	15.4358	1229.01	1.10194	0.334007	1.42298	0.334875	4.64768	12.4218	7.92559	5.58507	5.47402	2.65644	10.08	30.5961	9.918	1.53805	47.1762	10.351	6.75872	0.700837	0.805062	28.7985	3.37638	0.492229	1.70939	29.3395	23.4986	24.6327	10.7863	11.0195	19.4277	10.1847	0.71363	13.541
TCGA-BP-4983-01A-01R-1334-07	0.0885569	1	617.546	2729.2	3346.75	0.456934	0	1	9.65994	30.3737	28.7589	0.761267	5.25557	4.07774	17.8254	22.512	1569.09	1.63305	1.21061	9.35986	3.96233	50.2934	7.62629	5.07988	29.5398	12.7135	4.17339	46.1821	104.457	25.2949	4.63014	95.1626	15.4863	15.9093	1.47662	4.32873	86.8801	8.56205	0.261697	0.553189	111.552	14.2342	31.6585	21.9783	32.3738	1110.17	61.7424	6.53432	17.0064
TCGA-BP-4985-01A-01R-1334-07	0.00763556	1	771.462	1429.34	2200.8	0.599405	0	0	6.47559	4.5012	7.92149	0.0783994	3.58281	0.207853	2.6515	6.90924	359.994	0.214048	0.339394	0.516231	0.273436	7.1289	12.215	3.86369	16.317	2.24121	4.57366	5.34362	18.0544	5.7353	0.499161	0.404183	24.0505	5.5925	0.336387	2.60608	14.7075	4.43993	0.647249	0.739579	25.3243	34.9152	20.8213	4.60873	6.98627	48.8489	7.7194	4.69277	17.8911
TCGA-BP-4989-01A-01R-1334-07	-0.0428361	1	1097.86	3065.65	4163.52	0.347265	0	1	2.68681	24.9526	89.4062	1.20611	6.19363	1.26997	18.9331	27.1966	3273.44	2.55025	84.2404	9.79171	2.01157	50.2848	9.44333	8.23109	6.29142	11.5899	10.4093	57.4254	46.4565	28.1775	3.61131	61.8746	8.45439	19.6936	1.02173	1.47021	69.4615	6.46916	0.781504	1.55958	114.327	27.1003	88.0756	25.3213	45.2661	86.1721	15.9604	10.6515	10.0048
TCGA-BP-4994-01A-01R-1334-07	-0.0288957	1	-55.8696	712.198	656.328	0.763986	1	0	1.80364	5.60603	12.6298	0.287748	1.23425	0.390413	2.0397	6.48062	466.39	0.258363	0.879677	0.595355	0.134502	58.3867	7.4984	3.68191	3.98089	1.74745	3.8596	4.48742	22.5359	6.35688	0.362475	2.00442	9.94595	3.635	0.169554	0.23215	14.4997	1.4481	0.199875	0.325934	23.4131	15.6152	15.8116	4.96119	4.69438	108.697	7.68242	0.586224	4.71759
TCGA-BP-4995-01A-01R-1334-07	-0.0586353	1	214.28	1120.31	1334.59	0.696068	1	0	2.58495	8.02143	18.1078	0.272576	1.82549	0.617517	2.96101	8.86698	615.049	0.500265	1.59955	1.13339	0.132038	97.0893	10.4007	5.88469	5.45254	2.41805	5.27587	6.8088	32.698	9.79723	0.365556	3.37659	9.88764	5.06052	0.330476	0.245186	22.0276	2.03871	0.177446	0.351249	29.7924	19.4604	19.9261	6.76258	6.46157	175.611	11.5301	0.704437	6.8444
TCGA-BP-5004-01A-01R-1334-07	0.00218312	1	692.74	1045.28	1738.02	0.652355	0	0	1.16353	7.02421	63.8302	0.326461	8.47506	0.0774231	2.13018	11.6692	964.366	0.333161	0.164652	0.942202	0.42007	5.3821	17.334	9.63691	4.16959	4.0361	4.26139	7.04181	29.9761	6.6902	0.443961	39.054	19.4774	6.57061	0.326637	0.273699	23.7397	2.58808	0.194986	0.535263	29.1728	4.58601	25.1634	6.08924	5.01089	5.80814	29.0394	0.953383	5.98559
TCGA-BP-5006-01A-01R-1334-07	0.0255008	1	609.586	1345.77	1955.36	0.627848	0	0	2.23329	5.90273	19.3367	0.0511663	2.71123	0.0528365	1.99901	9.8251	859.647	0.351235	0.324341	0.639731	0.363282	3.38356	13.4061	5.2083	3.65668	4.01111	3.73861	4.98133	26.5949	8.82294	0.664413	64.3475	11.6782	7.10271	0.37031	0.44381	27.0881	1.76835	0.567443	0.847726	40.0021	22.4676	19.7791	6.7859	9.58929	7.04824	11.5498	0.485751	13.9131
TCGA-BP-5007-01A-01R-1334-07	-0.181276	1	457.797	1505.89	1963.69	0.626896	0	0	3.8737	7.64859	16.8161	0.39223	5.62553	0.14665	4.07141	12.0891	1254.92	0.385104	0.955114	1.4569	0.65769	23.2715	30.0593	4.95039	7.64323	3.38254	2.77325	12.5811	26.5076	9.34021	0.370915	21.8702	10.29	6.74439	0.571569	0.519047	24.1188	2.10497	0.497176	0.913165	30.287	30.0324	27.0328	8.30251	11.3038	21.0956	8.37829	3.17906	12.9425
TCGA-BP-5008-01A-01R-1334-07	0.19847	1	1212.11	2037.65	3249.75	0.469552	0	0	3.31634	15.4265	40.1322	0.447861	22.5866	0.462109	5.86983	11.3303	918.52	0.854985	2.6452	3.01758	1.76787	19.2905	9.51859	4.49024	8.86533	4.7311	10.3435	14.6928	36.1742	12.9281	1.23127	17.2086	14.4379	10.4609	0.838844	0.964983	39.4683	3.67631	0.366139	1.95672	47.919	21.5054	28.9628	10.3067	13.1093	23.3923	19.9804	2.7504	7.4645
TCGA-BP-5009-01A-01R-1334-07	0.0307611	1	839.898	2055.74	2895.64	0.51479	0	0	1.22712	9.67305	12.1504	0.301735	3.08385	0.456568	5.96638	18.0527	1352.42	0.895523	6.37743	1.71411	0.464281	141.223	6.60309	4.47122	4.65238	6.77078	3.46273	18.5717	29.6183	12.8197	0.983879	43.0631	14.9494	8.78656	0.863845	0.814243	31.8312	3.07577	0.322372	1.18453	67.2929	37.2366	15.264	13.6822	16.8498	132.913	10.7486	1.77548	9.38846
TCGA-BP-5010-01A-02R-1420-07	0.227378	1	1306.94	1483.11	2790.05	0.528015	0	0	0.840211	3.15253	6.8777	0.135214	1.80102	0.0898754	3.02542	6.06048	719.686	0.372242	1.58532	1.21571	1.00213	16.1107	3.85598	1.61925	3.55179	3.52262	3.41666	10.2716	11.2074	5.32778	1.98967	80.7585	14.8642	4.79886	0.775767	2.15888	12.4872	1.13919	0.627169	1.39851	28.1316	22.065	11.0855	5.29369	12.4861	43.4155	2.47235	0.876891	5.70503
TCGA-BP-5168-01A-01R-1420-07	0.0646795	1	426.156	1083.6	1509.76	0.677379	0	0	2.53724	3.67354	14.979	0.0585765	1.91673	0.0398201	2.80654	6.87398	1361.19	0.287869	0.0576319	1.2214	0.250731	7.84509	15.6882	5.25884	8.26278	2.59534	2.09514	9.07551	21.2283	5.71988	0.277729	1.55492	19.0938	6.56325	0.249028	0.445473	16.9422	1.20963	0.202798	0.59592	27.3045	22.9981	22.353	6.14472	8.32587	6.81802	4.47048	0.884706	15.2578
TCGA-BP-5173-01A-01R-1426-07	-0.0822341	1	673.299	1756.8	2430.1	0.572129	0	0	2.29202	9.50783	55.2938	0.624188	2.40582	0.123643	7.23608	9.57682	5008.01	1.80011	0.608428	5.09617	0.432517	4.48083	11.0352	3.4051	7.15309	3.29276	3.292	27.2605	42.4491	11.0192	0.357264	19.1527	10.8399	8.1137	0.569192	0.524282	25.2892	2.4767	0.108986	0.378482	44.1188	14.1272	35.0467	7.34069	13.472	16.7046	11.7594	3.77358	12.9159
TCGA-BP-5180-01A-01R-1426-07	-0.369233	1	-19.4591	1919.98	1900.52	0.634093	0	0	1.63253	7.86127	15.2449	0.174968	3.05756	0.215153	4.48586	19.6294	2017.76	0.595534	0.639617	1.80122	1.2476	50.3351	14.1035	6.51378	8.12195	6.40452	4.38358	18.4926	46.9009	18.3636	0.590973	120.035	10.6629	6.8043	0.892307	1.07022	33.1928	3.06114	0.432831	1.67716	85.7254	24.3634	20.3359	14.0016	20.3504	57.0937	3.21962	1.11515	23.3503
TCGA-BP-5181-01A-01R-1426-07	0.0249758	1	733.133	1261.35	1994.48	0.623368	0	0	6.76841	6.62277	19.9382	0.128776	5.98154	0.0686243	2.98933	9.8058	1019.24	0.440091	0.297961	1.01851	0.170362	6.87243	36.2819	7.19418	21.9181	3.44566	4.15689	8.11547	23.9106	10.411	0.185275	2.44322	12.7258	6.43388	0.557607	0.299575	21.7916	1.71172	0.195127	1.31912	23.6544	24.8752	21.0446	7.79245	10.3704	6.11185	6.20181	0.43488	25.6621
TCGA-BP-5182-01A-01R-1426-07	0.19958	1	1708.15	2428.1	4136.26	0.351015	0	0	2.40788	14.1151	21.3961	0.530795	11.3847	0.503847	7.19336	25.4796	2073.84	0.928078	1.1017	1.71164	1.0461	127.969	10.7981	5.49976	9.29336	12.5465	6.23454	21.5821	135.711	21.5688	0.595922	18.2573	17.7068	10.9044	0.960279	0.627889	60.8194	5.71623	0.426014	2.72958	110.161	9.79202	16.7528	15.729	17.8833	259.156	52.8751	1.67215	10.6559
TCGA-BP-5183-01A-01R-1426-07	-0.0524133	1	131.203	1943.76	2074.96	0.614087	0	1	2.16978	11.234	16.7298	0.311825	3.6581	0.178385	6.58254	13.4095	2320.93	0.936488	0.774534	1.76644	0.820129	30.195	18.4726	11.3296	11.2622	6.87478	3.41909	19.5177	39.8221	17.7859	0.609387	38.4141	10.3564	9.33713	0.668469	0.965623	36.8432	4.21517	0.434279	1.49774	60.3619	40.5195	37.8957	10.3877	19.8375	36.4064	7.03863	3.06633	25.9087
TCGA-BP-5184-01A-01R-1426-07	0.183265	1	1094.91	1587.12	2682.02	0.541415	0	1	1.51161	7.13529	19.567	0.205423	7.88509	0.204813	3.87891	15.8293	1035.87	0.55024	0.612884	2.32903	0.396958	39.6048	16.1562	8.09484	6.9107	4.64885	4.24824	12.0904	30.3418	13.6606	0.157189	1.40678	11.7554	6.19112	0.47119	0.209751	29.6536	2.2118	0.309023	0.869825	34.0674	25.4804	15.9688	7.05542	11.8535	24.3908	17.7185	0.77675	12.7046
TCGA-BP-5187-01A-01R-1426-07	0.0451295	1	898.228	1239.55	2137.78	0.606783	0	0	3.49931	7.13796	14.1546	0.311105	6.70298	0.298834	3.15055	6.8448	750.828	0.546922	4.79586	1.9007	0.793939	28.0996	17.3131	6.36731	8.76493	2.17232	3.28395	9.72398	21.1522	12.1444	0.158297	8.14842	11.7586	6.47872	0.630837	0.71667	19.2726	1.63005	0.0666859	1.4667	26.8012	28.7297	12.7752	7.05009	6.15647	45.4184	6.96367	0.530795	9.54931
TCGA-BP-5192-01A-01R-1426-07	-0.119341	1	125.472	420.106	545.578	0.774374	0	0	2.33588	2.6426	8.10927	0.0781144	1.75847	0.0408884	1.65195	3.28384	507.004	0.211137	0.710136	0.548109	0.0885437	4.2216	19.2036	4.80591	6.45934	1.29885	1.38301	4.36881	11.1574	3.48442	0.16878	8.92569	9.60111	3.00988	0.216473	0.189715	7.23361	0.779663	0.0572086	0.421184	13.2262	26.1076	11.7038	5.34382	4.22126	9.90758	3.67382	0.239064	13.2982
TCGA-BP-5196-01A-01R-1426-07	0.188634	1	1001.53	1778.43	2779.96	0.529273	0	1	2.45504	6.34683	25.6721	0.358226	4.18351	0.419783	6.5934	10.0358	1440.42	0.908179	0.382659	1.99374	1.51713	61.4608	9.95879	0.632745	10.5248	4.80973	4.44978	22.8746	15.7025	10.6999	0.922021	128.278	21.7368	6.54835	0.547935	1.58185	24.9806	2.89683	0.136288	1.07911	52.5441	22.0592	29.7016	13.2256	23.0257	65.2241	4.46187	4.42599	17.1404
TCGA-BP-5199-01A-01R-1426-07	0.332796	1	1342.93	2533.19	3876.12	0.386506	0	1	2.66721	17.9305	20.6304	0.684498	4.22255	0.375547	13.7224	13.4977	1958.18	2.29689	2.54108	7.32258	3.521	64.982	7.47475	4.06097	10.0217	6.85235	6.5836	47.2115	56.4424	18.8112	1.46445	24.3067	22.0045	17.1955	1.10609	1.81619	40.9168	4.45288	0.291261	1.21377	79.574	31.1223	41.9519	16.3035	33.7166	77.6331	9.06172	10.8538	10.2337
TCGA-BP-5200-01A-01R-1426-07	0.256173	1	1228.11	1868.5	3096.6	0.48928	0	0	2.05569	14.2493	26.2009	0.191773	5.67422	0.428667	5.54467	14.0852	1474.68	1.06828	4.30495	1.75963	0.97631	80.2865	8.46798	4.53229	10.7395	5.14593	6.44989	11.8984	47.0987	12.1693	0.428649	68.1412	13.9422	13.0896	0.433944	0.592629	34.6631	4.44901	0.208408	0.755217	43.2143	16.2048	27.2853	8.59845	13.966	95.1946	31.3963	2.19617	10.714
TCGA-BP-5201-01A-01R-1426-07	-0.179112	1	240.046	2011.91	2251.96	0.593377	0	1	1.8097	12.3603	15.0489	0.190253	2.02875	0.191664	9.2555	11.0907	3660.73	0.535666	3.4403	4.64125	1.85242	40.6227	13.278	4.66354	7.24059	4.51713	3.81796	34.9623	28.0419	15.884	1.34072	84.7068	11.3166	10.2295	0.607556	2.39589	31.4838	3.09666	1.3353	0.854851	73.3128	29.562	40.8407	8.39885	28.8406	34.3499	2.9922	9.47552	17.3282
TCGA-BP-5202-01A-02R-1426-07	0.197926	1	608.619	1157.54	1766.16	0.649219	1	0	2.20975	6.34332	15.432	0.164009	1.80314	0.052188	1.77343	9.66618	1289.25	0.16768	0.196383	0.510769	0.115621	8.53384	12.7219	6.05791	6.63415	4.06958	1.97419	5.88568	31.4802	11.9918	0.218394	2.19786	9.84442	7.58131	0.332419	0.14125	24.5178	2.41003	0.286232	0.702909	35.9324	21.9269	22.9335	5.96672	6.31139	8.20964	26.6539	0.146462	11.4953
TCGA-CJ-4635-01A-02R-1305-07	0.0156066	1	825.542	2060.03	2885.57	0.516056	1	0	2.18675	18.1978	22.6077	0.447538	3.37114	0.275783	9.69022	20.3569	1423.86	1.81076	0.134542	3.9863	1.07312	33.8143	6.56069	9.04945	9.12399	7.38282	4.04783	34.1481	47.2805	17.4789	1.26894	42.1047	10.6772	10.4653	1.265	1.44253	46.247	4.89904	0.127464	0.720887	46.508	27.0448	19.2995	14.494	23.9187	42.5774	15.4451	3.60895	9.66668
TCGA-CJ-4637-01A-02R-1325-07	-0.0151337	1	1082.11	3128.78	4210.89	0.340735	0	1	6.66623	43.7901	59.8944	2.28826	9.89707	3.89161	24.9865	36.4234	3258.54	2.87527	3.32476	14.6134	5.13709	170.337	11.4586	7.48744	17.9744	17.809	19.8401	82.2843	104.915	47.7647	3.44114	68.9169	15.57	23.6785	3.2572	1.95895	99.9491	10.4721	0.385252	2.12992	163.105	28.2132	70.8075	28.2293	53.7952	330.187	22.4418	20.5331	26.0755
TCGA-CJ-4641-01A-02R-1325-07	-0.0435246	1	1056.23	2727.35	3783.58	0.398998	1	0	2.95133	29.1447	44.2621	1.93707	23.5548	1.06625	16.2141	27.0481	2656	2.81785	9.54304	10.3599	2.46312	105.489	8.03704	3.5728	8.26574	10.904	8.93799	47.1176	70.2129	27.2449	2.47305	39.6968	14.204	14.4066	2.15806	2.87227	64.5285	6.62782	1.22654	3.58207	112.921	19.0774	39.6784	27.1538	36.8622	148.952	15.3224	5.88415	17.4241
TCGA-CJ-4644-01A-02R-1325-07	-0.0320395	1	961.429	1945.53	2906.96	0.513364	0	1	6.36858	12.6172	28.9987	0.168226	4.58813	0.150461	5.47833	20.4369	1874.04	0.742979	0.417678	3.05367	0.517702	28.3129	25.3703	8.59799	12.4261	4.94303	7.18261	20.4493	60.1158	17.0827	0.243306	40.6797	9.49264	7.19414	0.659872	0.373854	41.685	3.08653	0.231913	0.875849	65.0472	23.4606	42.3066	9.23876	17.7326	58.2023	12.6941	2.55259	22.4927
TCGA-CJ-4870-01A-01R-1305-07	0.320927	1	567.293	1201.65	1768.94	0.648909	0	0	2.14932	3.40661	16.5929	0.0498287	2.22519	0.0322926	1.6441	4.24039	627.662	0.239437	1.35898	0.541372	0.0955842	6.03495	20.5462	2.75345	5.37848	2.35321	5.00934	5.32133	26.0073	5.93904	0.297004	1.43093	12.957	3.91372	0.271859	0.591645	17.0755	0.776026	0.379527	0.446095	32.7921	19.7703	11.8134	4.70436	8.13489	13.9558	4.50005	0.243996	8.72861
TCGA-CJ-4871-01A-01R-1305-07	0.0633906	1	1001.06	1343.15	2344.22	0.582422	0	0	1.66434	6.24719	17.0156	0.115211	2.82967	1.23378	3.00483	10.7139	2663.66	0.307561	0.0923615	0.88857	0.163706	4.80407	10.1806	4.26869	7.2118	2.99636	3.71661	8.81314	25.1443	6.96643	0.336998	63.1322	16.1539	6.19123	0.410181	0.518168	17.9217	1.4062	0.312507	0.790069	29.9961	20.3949	21.1776	8.42801	9.324	10.9949	4.1684	0.552211	9.15524
TCGA-CJ-4872-01A-01R-1305-07	0.0315921	1	1421.41	2064.93	3486.34	0.438614	0	1	3.56892	10.1107	23.6969	0.321829	10.0716	0.346892	5.78323	17.5971	1898.18	1.59348	50.8052	2.53317	0.659822	87.1971	12.8997	1.88983	11.0138	4.60579	5.40471	18.5395	39.618	11.7639	0.764714	32.1149	15.4489	7.91936	1.36341	1.2675	31.4843	1.97332	0.535098	2.43344	54.9735	30.9225	21.6316	11.7118	12.4607	196.839	10.8038	0.790992	10.8262
TCGA-CJ-4874-01A-01R-1305-07	-0.283036	1	794.813	2000	2794.81	0.527422	0	1	8.12504	11.7691	33.0735	0.235002	3.71401	0.0419981	6.48532	18.1928	2187.01	1.31832	0.124767	3.70002	0.487136	3.62368	26.9572	10.1268	11.9085	4.44594	5.67271	22.8167	53.0042	19.7707	0.251074	44.9296	10.2313	7.86134	0.510706	0.574336	33.9278	2.76981	0.389679	0.911196	58.19	31.9677	36.9258	9.95378	17.5434	16.6764	10.5129	2.59768	28.3547
TCGA-CJ-4878-01A-01R-1305-07	0.333516	1	225.881	760.263	986.144	0.731865	0	0	1.79452	2.69545	13.8722	0.0569212	2.02567	0.110352	1.11343	6.54098	657.985	0.0569829	1.16362	0.209961	0.319848	2.94236	14.1164	2.61843	12.1203	2.58995	2.13655	1.85218	11.3924	2.97917	1.68697	1.75517	11.248	5.37747	0.301243	0.904558	15.3332	0.738282	0.277916	0.540475	29.179	20.8744	14.9791	5.6583	4.82424	11.8428	9.95131	0.309695	14.7703
TCGA-CJ-4884-01A-01R-1305-07	0.047955	1	675.645	2199.24	2874.89	0.517399	1	0	2.92845	15.2612	19.5445	0.362632	6.31575	0.717282	7.00705	20.3203	1735.52	1.04223	0.953726	2.75368	0.911175	256.01	12.9531	4.01749	10.6907	8.88406	4.86692	22.2287	52.3163	19.5919	1.42936	64.428	12.3035	8.89533	1.12786	1.48365	41.2647	3.84603	0.708215	1.93583	53.3408	21.2498	32.1301	12.6159	19.4526	268.436	14.3784	2.36623	20.9488
TCGA-CJ-4885-01A-01R-1305-07	-0.23639	1	324.469	906.106	1230.57	0.706949	0	0	0.867828	3.67567	60.2031	0.119662	0.468218	0.0287982	1.84118	8.29256	693.309	0.198276	0.580541	0.460758	0.151109	5.56699	24.4249	7.25858	3.59046	2.1528	3.05097	4.37929	14.5044	10.4472	0.18446	22.6234	8.5688	3.32726	0.18939	0.100214	13.5753	1.04026	0.265932	0.428177	27.5505	19.9997	28.0268	6.8452	8.55912	7.56138	1.7635	0.353589	6.88888
TCGA-CJ-4888-01A-01R-1305-07	0.159429	1	1210.16	3056.59	4266.74	0.333017	0	1	7.39411	30.9574	38.8256	1.61008	22.6269	6.78623	13.3279	30.1365	2673.83	4.25982	0.215741	10.0827	3.22225	595.115	12.3906	3.70053	14.9678	13.1909	13.2728	42.3741	98.5574	30.4313	1.18818	15.6619	14.4206	18.2869	1.80601	2.1414	72.9204	6.41777	0.853496	2.05139	123.686	27.2963	49.6408	19.1188	32.5494	1759.11	32.6995	9.53998	15.3328
TCGA-CJ-4890-01A-01R-1305-07	0.182969	1	1976.02	3134.05	5110.07	0.214042	0	1	2.69923	31.5791	30.2598	1.46123	21.0362	5.98174	14.4498	47.7754	3095.45	1.96202	168.117	7.30321	1.537	240.586	6.32007	5.24934	11.3122	21.4327	20.0919	44.3724	166.369	40.2119	1.53225	18.6852	21.1251	21.1432	2.52418	1.33526	98.3428	8.59148	0.724763	2.43041	157.072	15.4451	27.3733	24.632	31.4435	816.838	71.9881	7.26064	12.1363
TCGA-CJ-4892-01A-01R-1305-07	-0.430174	1	699.486	1956.88	2656.37	0.544577	0	1	2.73618	9.76337	15.3739	0.173544	2.16362	0.139755	10.1594	10.0962	2294.61	2.13825	1.04024	3.61253	1.10967	11.9174	22.6885	6.97517	7.61046	4.61471	2.06469	34.323	23.4004	14.3233	2.48657	14.3142	12.7613	8.22329	0.716774	0.82856	30.1182	2.43129	0.286787	0.9054	39.2677	30.513	37.1436	12.2033	27.1168	17.3413	3.09042	11.5874	15.9789
TCGA-CJ-4893-01A-01R-1305-07	-0.225632	1	895.034	2044.55	2939.59	0.509249	0	1	2.84339	13.865	38.9072	0.172227	8.25941	0.10079	6.76131	14.9007	1903.25	1.68666	1.34528	4.19209	1.59964	24.6645	11.2253	8.41655	8.14975	4.13317	5.41482	15.5813	55.197	17.977	0.675075	74.8651	13.14	7.95083	0.489603	1.03056	35.097	3.28918	0.175491	1.34076	61.0103	25.0106	37.4793	8.72478	17.8571	45.0608	13.2465	1.91193	15.6549
TCGA-CJ-4894-01A-01R-1305-07	0.0802384	1	713.906	2210.89	2924.8	0.511116	1	0	3.53662	17.5127	50.051	0.744235	1.66308	1.01508	9.89762	17.721	2177.7	1.70773	6.89615	4.12621	1.37805	77.1189	15.6016	11.7004	10.2963	7.45584	8.31018	34.7633	59.5779	24.6037	0.566962	32.3478	16.615	13.0697	0.767625	0.699537	47.5021	5.20686	0.0734905	0.552965	59.0881	31.961	61.8954	13.8472	23.3624	133.062	14.6491	6.61733	16.8386
TCGA-CJ-4897-01A-03R-1426-07	-0.245807	1	727.543	1035.12	1762.67	0.649609	0	0	2.66256	5.55145	25.6584	0.121894	2.74964	0.377937	2.27792	7.36612	1178.75	0.232148	2.13005	1.12156	0.114061	30.7747	21.0724	7.21351	6.46876	1.34276	2.54514	7.27952	22.2997	9.12935	0.155057	46.4332	9.1171	4.55341	0.339857	0.385096	19.9534	1.72416	0.0958037	0.520226	28.5728	23.2135	20.0613	5.48451	6.57537	182.712	6.55167	0.675907	11.2957
TCGA-CJ-4901-01A-01R-1426-07	-0.0396688	1	1039.75	2979.21	4018.96	0.367084	0	1	2.68086	30.6559	35.0131	0.779974	6.60636	3.4859	16.4335	21.7761	2395.69	2.68293	3.24893	8.79986	2.53055	438.637	5.27333	3.5318	9.34453	8.74076	10.8157	48.2677	67.9636	29.468	3.56786	37.3161	12.554	17.3736	3.03174	4.36866	67.1482	7.81018	2.20521	2.27899	117.128	57.9706	31.7998	22.8062	36.4312	1130.4	17.8579	4.64722	10.9394
TCGA-CJ-4903-01A-01R-1426-07	-0.351702	1	865.635	1830.07	2695.71	0.539725	1	0	1.97916	10.803	27.9038	0.307572	7.96279	0.391255	5.28046	16.3787	1461.24	0.509635	1.60697	2.65668	0.758308	354.689	15.6313	10.3998	6.12395	6.02086	3.34305	13.7706	42.2612	17.1765	1.2854	68.029	10.7706	7.58509	0.597014	0.400687	33.2343	3.16662	0.155349	1.23723	57.5678	16.4112	29.4884	9.82768	13.0969	42.0957	16.4179	1.86096	16.5258
TCGA-CJ-4904-01A-02R-1426-07	0.303927	1	854.324	1537.75	2392.07	0.576698	1	0	4.17428	8.84283	19.1401	0.112306	3.75261	0.0623848	3.56698	12.5203	1421.52	0.279463	1.43075	1.68015	0.262994	6.40905	12.2202	3.91261	10.9483	3.53779	5.02805	9.11429	48.1944	10.7291	0.3347	2.95019	18.5026	7.34787	0.452945	0.285744	23.9592	2.32837	0.300798	0.665931	45.4942	23.9695	28.1044	7.28977	8.78927	11.2978	9.07917	0.808056	12.0761
TCGA-CJ-4916-01A-01R-1426-07	-0.337464	1	833.863	2783.3	3617.16	0.421276	0	1	2.62535	19.0997	29.0984	0.480811	5.76876	0.886305	16.6559	25.1915	3886.52	2.28353	1.00846	8.41395	2.9574	165.089	9.09575	6.46414	6.10401	9.01107	6.0276	55.5531	73.4865	27.7253	2.57151	40.9159	8.07577	14.9151	0.858598	1.00581	60.6631	5.1088	0.229295	1.04655	105.019	27.341	55.634	17.1364	39.5988	316.392	13.7155	12.5802	13.0052
TCGA-CJ-5675-01A-11R-1541-07	-0.100322	1	360.623	2557.76	2918.38	0.511926	0	1	3.41209	25.2993	47.3552	0.612441	3.49759	0.18658	16.3357	22.4436	5276.62	1.20066	0.33141	5.96212	1.64652	20.8614	12.8536	9.33155	8.58498	8.14329	8.41283	46.7118	67.409	26.8636	0.551371	29.5484	9.01084	14.4733	0.570896	0.642715	54.6848	6.337	0.149511	0.951895	119.444	30.0347	70.1623	17.5082	35.3078	14.1921	8.3933	16.0285	14.3791
TCGA-CJ-5680-01A-11R-1541-07	0.158302	1	462.521	989.088	1451.61	0.683634	1	0	1.6903	5.30221	15.0102	0.0493137	2.26455	0.0223488	1.1764	8.49729	919.897	0.242347	0.0970367	0.351772	0.211082	4.68573	9.47797	6.29669	6.74525	3.56078	3.43642	2.68499	26.1544	9.89473	0.360737	6.28552	17.3066	3.22143	0.159178	0.229857	19.0679	1.76925	0.144463	0.41047	46.3346	13.8323	21.0195	6.96009	10.0954	10.9775	4.3794	0.211681	11.19
TCGA-CJ-5681-01A-11R-1541-07	-0.187626	1	-312.941	281.889	-31.0516	0.825093	0	0	0.214232	4.05007	19.9055	0.0275527	0.980523	0.0663881	0.62539	6.30886	601.374	0.0689563	0.258433	0.124729	0.216217	0.62667	2.87796	0.388877	5.47521	1.44929	0.872215	1.96161	10.9299	4.03942	1.53964	0.210551	15.2126	3.29979	0.135212	0.384152	10.4556	1.33024	0.0134525	0.0747476	29.2872	2.62684	3.80768	4.32168	5.17572	2.903	4.85976	0.465785	21.61
TCGA-CJ-5682-01A-11R-1541-07	0.0537521	1	1141.95	1331.91	2473.87	0.566847	0	1	2.18832	6.53913	15.7111	0.178461	5.41463	0.219449	3.60941	7.2156	1083.49	0.285848	25.3016	1.27466	0.197102	26.1436	15.6564	4.95363	9.0651	2.30251	3.72862	10.0335	17.2745	8.11978	0.203879	56.5601	15.6629	4.19871	0.571833	1.17186	27.6174	1.29327	0.871331	1.28299	32.3726	27.5449	26.0229	7.27434	10.0955	126.813	2.30025	0.686612	19.1294
TCGA-CJ-5683-01A-11R-1541-07	0.0628119	1	486.888	1032.14	1519.03	0.676378	0	0	1.41057	2.8711	24.2852	0.0304019	1.18084	0.184396	2.59755	8.86655	1318.42	0.0608697	0.0987084	1.15454	0.22974	1.30437	15.9591	6.85679	6.88143	3.06138	1.99357	3.80455	21.7499	5.83135	0.264266	15.7369	10.4716	4.65989	0.162358	0.970816	16.3731	1.25853	0.341403	0.226813	39.0976	27.265	21.9157	5.40642	7.56459	29.8425	6.01649	0.469646	12.7611
TCGA-CJ-5684-01A-11R-1541-07	-0.296214	1	687.25	1672.99	2360.24	0.580509	0	1	2.24708	9.74247	18.6217	0.172559	2.21641	0.130198	6.71293	10.7781	2137.18	1.77882	2.79626	2.17459	0.146394	27.2876	12.8015	5.63095	8.73484	4.26401	2.65747	22.4689	33.5214	11.2505	0.347479	23.792	9.85918	7.82122	0.565441	0.616681	27.2223	2.14019	0.409871	0.948922	46.986	34.5247	30.2463	6.22721	18.1799	27.8035	10.2894	2.38157	15.3668
TCGA-CJ-5686-01A-11R-1672-07	-0.218193	1	823.694	2016.35	2840.04	0.521769	1	1	2.02688	15.1896	32.7533	0.347633	12.6655	0.676433	4.38296	20.2291	1500.72	0.920542	0.242729	2.01932	0.749635	32.0384	8.74756	7.78098	5.77495	7.40708	6.01459	15.5149	44.0631	15.8536	0.534727	8.47924	13.0538	7.1138	0.925822	0.504356	38.0962	4.08255	0.273759	2.07633	56.4959	22.1099	22.272	11.6739	12.9058	174.267	24.0822	2.07225	8.99501
TCGA-CJ-5689-01A-11R-1541-07	0.285165	1	1436.12	2072.53	3508.65	0.435668	0	1	1.3393	9.9775	17.7567	0.114308	2.75872	0.264407	5.31566	14.5628	1128.06	0.617929	1.5637	1.84217	0.398674	249.452	7.42404	2.35448	6.25672	5.4098	5.22312	11.7994	37.05	10.6709	0.374731	31.8546	21.5003	7.5325	0.629586	0.92539	30.8332	2.63327	1.2055	1.02334	88.0084	11.2045	20.64	8.70885	16.1785	80.8601	25.1012	1.45529	8.2315
TCGA-CJ-6030-01A-11R-1672-07	-0.0646249	1	1033.62	2697.15	3730.77	0.406094	0	1	2.2309	24.2435	57.8135	0.68448	8.73515	0.906626	8.00168	44.2285	2666	0.788802	23.1108	3.9333	1.3255	282.713	13.628	5.92306	7.23581	15.2337	10.4147	19.7245	116.557	32.414	0.895431	16.2873	14.9008	14.3711	1.38887	0.966504	74.0851	7.29111	1.11916	2.52628	145.597	25.5356	24.0608	22.7991	25.7126	169.383	45.0937	2.30359	16.8625
TCGA-CJ-6032-01A-11R-1672-07	-0.233872	1	342.909	1170.34	1513.25	0.677002	1	0	2.88544	6.87309	22.2741	0.0840033	2.15017	0.0509808	2.77008	8.74138	856.848	0.329065	0.150205	1.16288	0.261136	13.9161	11.9483	9.33655	5.51004	2.87251	2.62124	7.88926	27.5961	9.64473	0.342872	100.529	10.6983	5.59192	0.265688	0.226686	20.7408	2.01963	0.106994	0.40872	30.0727	19.9734	18.4606	5.944	8.1498	9.26478	5.28676	1.32216	18.6012
TCGA-CJ-6033-01A-11R-1672-07	0.282793	1	911.843	1429.4	2341.24	0.582778	0	0	1.19675	3.27229	7.49101	0.0821522	1.09783	0.0663069	2.30433	11.0662	1168.33	0.152734	0.32177	0.808731	0.129619	7.41941	8.13272	1.31342	5.90357	4.75221	4.03363	5.84021	19.2619	10.1071	0.518815	29.1048	26.3705	5.47442	0.271027	0.358928	21.6523	1.21065	0.160442	0.262669	55.1653	29.4577	21.647	5.69245	8.58379	25.4506	9.72805	0.964636	8.65949
TCGA-CW-5580-01A-01R-1672-07	-0.0162497	1	880.365	1333.17	2213.54	0.597907	0	0	2.89805	9.97657	22.1917	0.109788	5.99552	0.0895597	1.21927	16.5049	703.387	0.159864	0.0792125	0.647608	0.429323	25.7135	17.1068	8.71383	10.3259	5.57296	5.13195	3.65543	35.9735	12.0383	0.277619	20.5367	16.1012	7.19397	0.348616	0.538666	30.5241	3.27002	0.214413	0.575377	41.2621	20.0531	9.04448	7.26405	5.94397	5.56407	32.6076	0.267634	9.50746
TCGA-CW-6087-01A-11R-1672-07	0.212555	1	861.665	3233.16	4094.82	0.356703	0	1	9.27026	62.6672	90.0576	2.08262	7.65787	1.73981	23.5699	63.7736	4082.18	2.46972	61.359	13.8165	3.52105	74.4888	4.82772	6.26081	31.4485	34.926	14.2952	106.325	183.032	51.3134	0.936487	26.4597	19.8804	38.0074	2.85734	0.757756	186.889	15.0566	0.381923	0.918226	297.543	47.3511	71.4966	31.6555	45.3116	380.015	172.789	23.6357	20.1356
TCGA-CW-6090-01A-11R-1672-07	-0.243515	1	1278.58	2158.98	3437.56	0.445036	0	0	0.679362	11.3588	20.5818	0.251122	2.46036	0.513834	3.84701	31.2978	1222.87	0.484028	3.70756	1.6119	0.607864	68.6092	8.75318	2.1625	2.67024	11.4445	5.76642	11.9915	72.8984	18.4578	0.65346	8.90012	21.5376	7.97085	0.522588	0.414689	57.492	3.99038	0.285479	0.747362	101.209	28.7607	14.4927	11.2112	12.1072	57.5563	92.1269	0.911107	10.0893
TCGA-CW-6093-01A-11R-1672-07	0.187052	1	750.334	1064.07	1814.4	0.643816	0	0	4.72961	8.30921	15.0128	0.181515	2.19412	0.0589227	2.20607	9.53721	366.836	0.190164	0.338071	0.904517	0.0368068	2.78867	15.5993	7.79402	11.6587	3.25425	5.35475	2.88141	27.7573	8.17211	0.276771	0.855687	12.1425	6.84006	0.146227	0.193652	17.5344	1.95046	0.148394	0.498158	22.2759	21.7942	10.7089	5.16197	6.87553	3.00637	10.8972	0.125498	12.2622
TCGA-CZ-4853-01A-01R-1426-07	-0.441715	1	26.4714	1173.87	1200.34	0.71008	1	0	2.54031	6.93008	21.7379	0.222529	1.63308	0.123985	4.16685	9.42423	1558.55	0.835387	1.785	1.07157	0.559264	10.3983	20.2601	8.39775	8.98836	3.20784	2.68606	10.6933	23.2238	9.39492	0.81436	58.8334	9.01592	4.79492	0.770849	0.777121	20.2822	2.05926	0.306773	2.09075	27.4347	28.7833	21.1131	8.31732	10.5535	34.8548	3.26758	0.371993	14.923
TCGA-CZ-4854-01A-01R-1305-07	-0.268371	1	495.64	1324.11	1819.75	0.643216	0	0	1.22938	9.16242	8.95582	0.33047	3.85047	1.14915	4.22369	9.06665	671.359	1.01699	0.0883098	1.87772	0.398427	68.729	4.3324	13.8671	5.58837	3.99742	2.5351	11.4001	25.5788	9.51442	1.06392	78.2225	11.7983	6.10079	0.883304	0.946835	23.1906	2.57083	0.490028	1.66024	39.1634	18.5572	14.7838	8.09497	10.6243	71.1723	10.9784	0.941815	15.1382
TCGA-CZ-4857-01A-01R-1305-07	-0.255012	1	825.44	1720.37	2545.81	0.558116	0	0	1.35156	12.3099	20.1289	0.311549	5.57088	0.107112	3.63389	16.4671	789.564	0.645282	1.44172	1.29688	1.10533	10.0709	4.22742	17.9609	8.47436	7.17969	3.00975	11.2835	37.4579	11.942	1.05656	84.3988	12.9643	8.43522	0.758244	1.13063	35.2298	4.26289	0.660903	1.15851	59.6786	13.1552	13.614	10.5209	13.0746	19.9015	30.524	1.32453	9.52183
TCGA-CZ-4859-01A-02R-1426-07	-0.282645	1	-11.5399	637.333	625.793	0.76687	0	0	3.0183	3.64307	12.0813	0.10307	1.95737	0.0198898	1.55719	4.57205	589.528	0.209691	1.92151	0.592018	0.15075	1.82007	20.0593	6.79438	5.21709	1.18182	2.68392	3.03088	20.1328	4.93574	0.188268	12.8776	9.41964	2.93044	0.207312	0.349915	11.7482	0.819141	0.16558	0.324717	19.0244	12.8999	19.2901	3.98602	5.47091	3.99087	3.15914	0.215137	14.7915
TCGA-CZ-4861-01A-01R-1305-07	-0.265113	1	597.224	2541.32	3138.54	0.483902	1	0	3.56724	27.0291	55.9592	0.450994	11.6226	0.305847	5.44784	36.8689	1720.93	0.561302	0.747529	2.6118	1.26828	10.7049	10.2994	5.49644	9.64864	16.4335	7.04468	15.3341	117.897	28.331	0.774961	27.5515	12.4542	12.5638	1.20688	1.11835	84.7816	6.85905	0.28566	1.73605	138.803	20.127	26.6191	16.0682	19.7668	117.664	94.9345	0.973447	12.5736
TCGA-CZ-4862-01A-01R-1305-07	0.0750647	1	837.44	2642.55	3479.99	0.43945	0	1	6.26597	40.6719	66.8884	1.50056	15.0022	0.523637	15.1391	21.4354	1993.87	2.16314	0.259839	6.77482	1.27699	44.3432	16.2158	9.91424	18.0593	9.55959	14.2343	47.1823	79.76	31.5183	1.04646	38.2535	10.6106	15.6869	1.67895	1.24719	62.5914	9.39427	0.509918	1.34338	62.7035	24.6753	50.2098	17.7828	40.0572	59.222	29.7142	8.09303	15.0626
TCGA-CZ-4863-01A-01R-1503-07	-0.229063	1	789.727	2338	3127.73	0.48529	0	1	3.52912	25.1536	39.2411	0.766435	6.06395	0.19401	12.2499	22.031	2436.4	1.95593	0.25787	8.19762	1.54432	18.9737	17.5394	10.1839	10.1885	6.82137	5.61934	42.8113	74.1189	21.9442	1.42613	26.4495	12.3634	11.459	0.680936	0.91089	59.5091	6.49444	0.186135	0.961523	57.9337	31.0825	53.569	16.2703	33.3022	18.6536	6.62216	8.93802	26.4218
TCGA-CZ-4864-01A-01R-1503-07	-0.135476	1	690.587	2497.95	3188.54	0.477466	1	0	5.68203	25.561	58.5018	0.673808	2.56756	0.297214	8.94872	33.0999	3701.08	2.01302	0.801777	3.64118	1.538	7.0299	20.7579	11.639	10.725	12.467	4.87229	32.291	98.1654	29.3324	2.10274	14.9151	9.10274	16.3982	0.745445	1.02815	65.3805	7.07154	0.0516729	1.13411	80.3505	35.9681	78.6865	15.4741	25.4526	19.648	24.4354	6.31753	17.3132
TCGA-CZ-4865-01A-02R-1503-07	0.276584	1	1122.25	1888.19	3010.45	0.50027	0	1	7.22085	11.1553	27.6457	0.274831	2.3019	0.716437	4.46304	16.9386	1522.25	0.765202	154.451	2.04333	0.144779	119.925	35.1725	4.47157	14.6489	5.77254	3.70144	14.1454	36.628	16.4224	0.341277	37.0504	16.061	8.61144	0.644602	0.965681	43.6228	2.83194	0.578674	1.26401	80.96	24.4472	35.3829	11.7465	15.753	232.662	14.6768	0.891167	29.3062
TCGA-CZ-4866-01A-01R-1503-07	-0.290607	1	140.347	1255.13	1395.47	0.689624	1	0	1.46547	8.79255	23.1135	0.138029	2.16627	0.280636	1.17168	16.2086	677.784	0.138179	1.07205	0.428819	0.103833	7.92823	14.4631	5.51336	8.52267	7.04284	1.60092	4.18347	56.9699	15.3467	0.814657	41.2836	13.6401	4.2722	0.321103	0.131463	35.2078	3.30214	0.079285	0.539662	50.0496	7.01631	24.2653	9.70969	6.92249	20.7262	23.7226	0.449644	19.3643
TCGA-CZ-5453-01A-01R-1503-07	0.0483144	1	229.445	404.906	634.351	0.766063	0	0	1.521	2.62505	10.9425	0.0150097	0.602065	0.0205771	0.673068	4.24493	411.078	0.0901555	3.94738	0.203843	0.0130874	2.23452	14.1103	5.16133	4.71782	1.6793	1.38981	0.644472	15.8446	4.20465	0.318719	0.108663	8.77118	3.16367	0.0649926	0.253151	10.1911	0.781347	0.0989335	0.0839843	18.8087	14.4162	11.7864	4.73482	4.49986	14.1129	3.84941	0.118121	6.42456
TCGA-CZ-5454-01A-01R-1503-07	-0.264532	1	777.018	2253.5	3030.52	0.497716	1	0	1.79276	14.6119	23.534	0.151233	8.70147	0.0549735	3.77804	41.5156	1515.58	0.378492	0.211411	1.40253	0.13736	2.45763	16.5341	3.5548	5.99698	12.5054	4.18904	7.83246	135.724	20.699	0.751187	38.6166	10.0928	8.54472	0.657575	0.272072	75.6958	5.26468	0.526102	1.32059	144.175	30.132	17.2863	19.5567	9.76134	4.79034	91.5436	0.975266	10.9841
TCGA-CZ-5455-01A-01R-1503-07	-0.0457427	1	880.139	2328.44	3208.58	0.47488	0	1	5.3183	29.9538	61.9505	0.655864	4.34059	0.151803	7.24888	29.816	2155.82	1.89058	1.02036	3.5611	1.93006	11.2606	20.9266	8.38525	13.5141	9.10932	9.20794	26.7684	106.729	28.9529	0.615188	7.525	10.0102	12.5506	0.5832	0.655802	69.2312	7.31611	0.42887	0.363405	87.9001	28.5974	49.1833	15.9233	18.8404	7.02902	56.1383	5.01295	22.971
TCGA-CZ-5457-01A-01R-1503-07	-0.322536	1	728.906	1525.23	2254.14	0.593119	0	0	3.03533	9.33751	32.0271	0.24149	1.20209	0.935179	2.58469	17.1239	1632.78	0.33635	4.90136	1.13546	0.207512	29.3026	14.894	8.1864	5.69716	4.78538	5.14235	7.91443	69.4567	12.0772	0.260761	48.082	5.64533	5.62284	0.324308	0.453336	53.9145	2.63297	0.471627	0.284843	57.1248	20.1586	32.4232	7.51583	8.76588	325.211	35.6673	1.18128	11.2964
TCGA-CZ-5462-01A-01R-1503-07	-0.35668	1	264.47	1854.95	2119.42	0.608924	0	0	7.06603	12.0155	30.5735	0.21116	2.62615	0.341655	3.44957	14.9799	1003.77	0.689793	1.61975	1.02299	0.678327	22.9909	40.8289	12.9146	16.8678	5.22478	9.28797	8.33654	57.112	16.8354	0.861159	1.46612	7.09252	6.22396	1.00095	0.809748	36.7941	3.64866	0.564325	2.51754	58.8604	31.0336	41.0471	11.3752	15.0425	120.386	17.4843	0.421108	60.965
TCGA-CZ-5463-01A-01R-1503-07	-0.226255	1	302.036	1295.79	1597.82	0.667813	1	0	5.80615	11.9075	34.7236	0.136543	1.27949	0.0844057	2.8362	12.9046	1294.06	0.229641	0.342839	1.27333	0.35717	4.70074	13.2717	10.9685	5.64452	4.12172	2.82318	8.38228	61.0131	10.8318	0.411003	92.4391	6.95171	6.43474	0.31454	0.132648	23.2257	3.10869	0.2	0.394506	42.3739	16.0809	28.5429	10.1083	7.2523	7.47367	15.124	0.945606	10.794
TCGA-CZ-5465-01A-01R-1503-07	-0.293588	1	318.857	812.503	1131.36	0.717174	0	0	2.82236	4.65719	19.065	0.0771804	1.10737	0.0926267	1.36412	8.5971	643.705	0.145943	2.22745	0.379585	0.154532	5.31503	16.5427	4.92211	6.82546	3.10585	2.26097	3.40517	18.664	7.01303	0.340766	6.49118	9.74994	3.75219	0.339146	0.354838	16.7208	1.51182	0.08374	0.569985	28.6344	29.4331	14.1595	4.31801	5.22216	35.158	8.09007	0.254952	15.2998
TCGA-CZ-5466-01A-01R-1503-07	0.0440275	1	814.415	2368.62	3183.03	0.478176	0	1	1.44714	14.6736	20.5846	0.640012	9.84272	0.912779	7.99214	22.4794	1708.42	0.969415	1.24076	2.64536	0.854056	60.4822	8.97842	9.42584	5.15684	8.11426	8.05633	19.8765	94.3199	19.7806	0.995163	35.8048	11.7911	7.20295	0.853074	2.77837	51.6353	4.82531	1.10864	1.01912	87.2089	22.7245	18.4452	15.9379	22.2646	110.49	24.4366	2.91982	9.40785
TCGA-CZ-5470-01A-01R-1503-07	-0.180342	1	611.931	2169.93	2781.86	0.529036	1	1	2.21753	12.9832	33.541	0.355191	2.50741	0.413763	6.1439	20.1558	2333.27	1.21912	4.35402	3.05178	1.15033	97.2862	11.401	5.0023	9.26964	7.18863	4.11079	21.779	56.827	20.9721	1.39881	99.8046	11.2161	8.13324	0.922798	3.15913	46.054	3.51254	1.21041	1.61501	103.859	14.9902	49.5891	10.2111	25.726	344.179	15.965	2.73819	25.5285
TCGA-CZ-5982-01A-11R-1672-07	0.276652	1	438.969	766.003	1204.97	0.709602	0	0	1.04285	6.82446	17.9082	0.0755076	2.4062	0.0752837	1.53437	5.47262	418.944	0.226768	0.43263	0.790874	0.209131	6.62614	5.61358	4.31984	4.31066	1.9206	3.07323	3.91202	18.4869	6.15776	0.18532	47.2041	15.2029	6.12942	0.284641	0.599295	12.7102	1.6306	0.104093	0.442826	18.3626	24.6668	10.1026	5.00542	4.78698	3.55426	12.3049	0.466056	5.12172
TCGA-CZ-5984-01A-11R-1672-07	-0.326504	1	458.517	1759.97	2218.49	0.597324	0	0	2.50746	12.9287	34.97	0.310243	8.80218	1.47979	5.72512	15.7813	2058.68	0.874224	38.3932	1.49115	0.834913	30.8505	11.6922	3.09937	10.4275	5.60721	2.22925	20.1986	43.1535	12.4516	0.473716	80.8754	9.6019	6.97255	1.55234	1.42635	35.0395	4.18872	0.729325	3.18739	50.8824	28.2418	20.6686	13.8502	14.7561	445.952	8.94478	0.743507	27.2526
TCGA-CZ-5985-01A-11R-1672-07	-0.335389	1	480.399	2148.93	2629.33	0.547902	0	1	3.40137	20.2837	30.3969	0.386216	9.51698	0.932901	4.34237	22.9734	1432.83	0.502225	25.9065	2.07882	0.77766	81.5959	17.126	15.1764	8.44557	11.8274	5.18036	12.3353	97.4938	20.4744	0.824699	11.4531	11.4929	10.1418	1.21029	0.601693	54.0889	6.75932	0.419905	1.78228	81.5707	29.7895	23.6133	17.4587	12.3749	227.809	49.6271	1.54581	26.1609
TCGA-CZ-5986-01A-11R-1672-07	-0.182038	1	446.496	1076.89	1523.39	0.675906	1	0	3.00393	9.70328	19.6894	0.185727	2.83684	0.0274335	2.33821	12.5595	1006.51	0.351198	0.387121	0.799255	0.371866	3.9789	17.2608	10.5266	9.75193	3.40296	2.65041	5.69506	40.9071	9.43838	0.44076	0.315396	8.32399	5.45197	0.631452	0.167064	26.5801	3.04815	0.120907	1.58155	35.0334	22.764	17.8479	8.54567	4.63613	4.67883	11.0727	0.0842081	13.4994
TCGA-CZ-5987-01A-11R-1672-07	-0.187646	1	197.405	1826.59	2024	0.619974	0	0	1.8422	9.41546	22.6771	0.265903	3.85029	0.42886	4.04384	11.009	1788.79	0.869034	0.473983	1.69938	3.85961	70.5118	14.4095	8.89399	9.90982	5.36275	7.67123	14.9989	29.5763	13.2285	0.943955	89.6265	17.6911	5.16075	1.03623	0.991905	30.0111	2.9384	0.572761	1.20935	71.0228	29.8855	18.9741	12.0481	15.4448	133.738	4.19296	2.57126	20.754
TCGA-CZ-5989-01A-11R-1672-07	-0.145824	1	1039.38	1722.18	2761.57	0.531562	1	0	12.9475	44.3817	146.005	1.07188	5.15058	0.1163	1.46606	20.2753	391.729	0.246169	0	8.92451	0.637735	0.782225	38.864	30.5752	7.5488	2.78129	7.64749	24.9902	79.5682	42.6943	0.0751642	4.56468	2.86437	13.2866	0.922802	0	33.0042	2.71441	0.0738837	0.833885	44.396	7.92384	8.16468	14.7591	0.741757	1.26138	12.8241	0.0661598	12.8261
TCGA-DV-5568-01A-01R-1541-07	0.149047	1	965.309	1780.14	2745.45	0.533564	0	1	0.999422	6.62166	9.7565	0.246477	3.45277	0.0695506	4.38705	11.356	1440.82	0.796097	7.58984	1.58596	0.494702	8.18538	8.72131	3.01731	5.78654	4.96338	2.47956	23.4905	27.8836	10.2311	0.38807	105.278	25.7614	7.21039	0.467177	0.87847	28.4344	1.87001	0.4632	1.15439	49.2958	19.7647	15.055	9.44321	12.7385	20.7282	8.6837	2.61879	8.98396
TCGA-DV-5569-01A-01R-1541-07	-0.0538648	1	844.515	1683.5	2528.01	0.560282	0	0	3.63884	8.23358	22.0246	0.15904	3.03203	0.13214	2.89573	10.7821	1457.43	0.663385	0.812801	1.3266	0.369793	13.4826	13.4859	3.40481	12.1084	5.33827	5.25638	6.16726	40.7772	8.36333	0.724135	16.1833	14.0014	9.00724	0.267809	0.38149	35.162	2.80022	0.168243	0.476403	66.7533	24.1272	21.9415	8.2755	10.4882	26.2664	12.1911	1.35976	12.0439
TCGA-DV-5573-01A-01R-1541-07	-0.103382	1	715.86	2346.24	3062.1	0.49369	0	1	4.9626	21.6633	58.7274	0.664091	4.35138	0.351278	12.9883	24.0168	4097.81	4.5674	2.39207	6.96115	2.31617	15.2275	18.1118	7.42161	10.3259	7.29135	5.85287	61.3817	69.248	30.0661	0.543891	56.8486	10.3143	14.5943	0.381943	0.670319	53.8099	5.49743	0.475222	0.546672	85.4646	29.4659	60.544	19.3417	28.4067	42.7567	15.5755	11.9418	22.9127
TCGA-DV-A4W0-01A-11R-A266-07	0.260801	1	292.99	774.576	1067.57	0.723668	0	0	3.82019	4.31816	15.8245	0.103465	2.63704	0.257896	3.73588	5.44201	459.858	0.241681	1.07	0.633182	0.80191	23.4523	20.1312	5.98872	11.4714	4.9131	1.77024	3.29075	28.8351	4.83062	1.16489	1.40099	16.4192	4.41499	0.144359	0.449831	15.4782	1.11446	0.235744	0.339168	29.7817	16.987	17.0517	8.92406	2.9928	22.5845	9.11368	0.572983	21.4869
TCGA-DV-A4W0-05A-11R-A266-07	0.180997	1	-560.039	102.635	-457.404	0.858814	0	0	7.13615	1.78023	9.33849	0.0233271	0.472472	0.0186063	7.19057	1.17648	184.61	0.09808	0.121181	0.183041	0.0894947	1.54104	25.8441	0.213506	18.3267	0.903969	1.03805	0.72937	9.42769	1.2653	0.132089	0.0450341	16.5976	1.58576	0.0686852	0.239207	7.52944	0.313115	0.0820035	0.0759409	7.53261	21.7461	9.455	3.7894	1.71029	1.08267	1.53105	0.0979077	14.1799
TCGA-EU-5904-01A-11R-1672-07	0.0769674	1	950.897	1380.76	2331.66	0.58392	0	0	2.19303	7.02492	27.1027	0.0871578	7.93592	0.197696	3.01571	7.86499	1045.95	0.48425	7.16888	1.70318	0.288784	5.57537	16.174	4.13775	5.93013	2.02412	4.48155	6.47707	28.2097	8.21885	0.363653	40.4356	9.92773	6.5899	0.471748	0.235199	17.273	1.82984	0.24256	1.10836	28.8797	14.377	14.4014	5.38126	8.36482	35.5003	13.1289	0.655419	8.17443
TCGA-EU-5907-01A-11R-1672-07	-0.296928	1	284.141	548.496	832.637	0.747033	0	0	19.6287	4.21534	10.3083	0.0266239	0.743087	0.0132725	1.06859	8.62163	1347.9	0.159916	0.014407	0.331443	0.0696428	1.49666	30.6936	13.7269	47.3443	3.81714	1.74282	2.97513	22.0289	4.54852	0.357056	198.817	10.936	3.02324	0.230566	0.0718456	14.5868	1.55393	0.0974926	0.501081	26.1387	29.1059	21.4351	5.53586	3.72315	5.16643	21.0936	0.209521	56.2228
TCGA-GK-A6C7-01A-11R-A33J-07	0.450769	1	622.889	1291.44	1914.33	0.632524	0	0	2.0791	6.81581	14.2465	0.0669174	2.74542	0.0959084	3.44065	7.5081	825.44	0.502424	0.850958	1.06657	0.247977	19.1136	10.6455	4.26621	10.022	2.54988	2.32073	6.70423	24.1879	5.41024	0.355236	2.48282	16.9073	5.57097	0.373061	1.09476	15.6331	2.11959	0.404318	0.714813	27.4115	18.2584	34.3921	7.38947	11.1038	28.3472	7.33871	0.833812	14.7057
TCGA-MM-A563-01A-11R-A266-07	0.221224	1	1383.14	2522.67	3905.81	0.382483	0	1	3.04421	16.6847	28.0963	1.01946	13.8728	1.54732	10.2164	20.9965	1935.35	0.975063	26.6906	4.22311	2.66105	108.309	16.1949	5.83488	6.66851	6.66257	9.62885	25.7647	87.5812	21.0285	1.2095	49.25	15.7153	9.06027	2.42929	3.29426	53.2288	4.47716	0.856001	2.89341	103.395	19.8356	32.5082	20.0651	28.8704	290.099	15.8623	4.34925	13.3642
TCGA-MW-A4EC-01A-11R-A266-07	-0.251885	1	339.409	1112.27	1451.68	0.683626	0	0	2.02261	4.11227	15.8805	0.109976	2.08626	0.070489	2.62669	10.304	839.236	0.393196	0.0680128	0.600586	0.374434	5.99346	15.5585	8.79129	3.88581	3.80935	1.82597	6.31913	14.2506	6.653	0.577474	13.0674	8.79664	5.38548	0.326538	0.339171	17.3039	1.42541	0.230123	0.554084	26.6515	27.6969	25.9092	8.5857	10.8352	21.2887	6.80782	0.320546	11.9954
TCGA-T7-A92I-01A-11R-A37O-07	-0.178842	1	-609.094	591.421	-17.6735	0.823982	0	0	1.52593	4.67595	108.666	0.0548783	4.48624	0.0820733	1.48	4.79473	570.901	0.435578	0.466656	0.727547	1.62007	7.14256	16.5746	0.690724	7.42417	2.4958	2.76541	4.868	26.2724	4.01462	0.689251	10.4716	10.1667	2.24659	0.183312	0.0846236	13.9344	1.45705	0.160765	0.414735	17.6487	4.98353	6.06655	6.04461	8.01199	17.0012	2.82955	0.493571	11.7264
TCGA-A3-3308-01A-02R-1325-07	0.209329	2	1237.52	1317.41	2554.93	0.557005	0	0	1.72613	8.38519	22.0375	0.187166	4.00986	0.255217	2.50508	15.7442	713.671	0.446378	0.262139	0.805754	0.662385	29.7846	9.30885	4.60287	9.51103	4.99017	3.66701	5.62425	32.2457	7.51396	1.29607	20.5906	23.8916	6.25661	0.448125	0.772467	27.8757	2.61775	0.0483792	0.772843	35.5307	14.3918	7.71132	7.74629	7.70442	44.976	14.5503	0.394708	8.13732
TCGA-A3-3316-01A-01R-0864-07	-0.0218844	2	1524.16	1515.36	3039.52	0.496571	0	0	1.1206	9.92462	24.8551	0.194369	1.68745	0.108076	1.57268	21.4859	1111.22	0.516383	1.92558	0.48507	0.482356	3.55905	4.69715	7.43699	6.30734	7.04726	4.87844	5.11932	38.5673	11.3912	1.39247	60.1102	9.3306	7.34437	0.233066	0.161388	30.4281	3.18402	0.284699	0.456319	44.0369	25.0238	8.97866	8.3126	8.46551	9.81079	18.3808	0.300694	6.88289
TCGA-A3-3317-01A-02R-1325-07	0.0116706	2	1074.68	1565.82	2640.5	0.546529	0	0	3.24448	12.1925	26.7711	0.462714	6.27737	0.292335	3.29207	15.7176	940.087	0.522837	0.951972	1.57619	0.814902	6.59299	10.1777	17.5779	6.4805	7.20213	4.61188	11.2982	50.0584	13.1852	0.730462	20.8509	17.3406	8.5247	0.575285	0.605782	33.1415	3.7317	0.268418	0.792328	48.3869	19.0954	21.0667	10.8955	9.87857	28.4486	15.7193	2.19526	7.19667
TCGA-A3-3320-01A-02R-1325-07	-0.24496	2	533.713	1204.75	1738.46	0.652307	1	0	1.89619	9.77178	31.2996	0.156107	9.31071	0.132755	2.35374	13.0554	909.884	0.358517	3.74669	1.42031	0.592502	2.94061	23.7487	11.9001	7.57069	3.87397	3.06473	6.55116	25.6583	8.89681	2.69565	20.7859	10.9987	6.35485	0.286286	0.594723	21.1527	2.64031	0.228657	0.831437	31.1491	14.18	16.1345	8.0434	6.76048	14.7699	18.3264	0.939453	12.3113
TCGA-A3-3323-01A-02R-1325-07	0.0779991	2	1062.31	2017.1	3079.41	0.491479	0	0	2.35596	17.3691	32.6099	0.441758	7.33043	0.0998347	4.31079	29.8415	1271.6	0.866783	0.0764954	1.50208	1.27367	11.5638	14.5108	8.20997	8.73562	9.34324	5.40197	13.6568	44.2519	18.2025	0.272087	15.5216	14.2002	10.7075	1.00488	1.39873	41.3215	5.56809	0.500393	1.0786	43.8451	33.0125	10.4413	11.9427	15.745	11.0764	41.2326	1.4524	11.4227
TCGA-A3-3324-01A-02R-1325-07	-0.301581	2	655.036	1717.4	2372.43	0.57905	0	0	2.23037	12.0131	26.3369	0.204142	5.17223	0.0789224	4.49753	14.8996	947.282	0.475458	0.577136	1.54023	0.479506	2.88794	10.7546	10.2688	8.20051	5.34148	3.4196	13.2741	38.0905	12.087	1.0678	56.7936	12.4925	7.58847	0.537584	0.415975	29.9679	3.27284	0.280708	1.09351	43.6825	28.263	21.9353	9.86448	11.6932	8.90134	15.9323	1.75589	11.1057
TCGA-A3-3331-01A-02R-1325-07	0.0334618	2	829.452	1696.54	2525.99	0.560527	1	0	3.49874	13.6867	42.5161	0.227342	2.91987	0.218715	3.78901	19.1249	1539.57	0.850462	0.63885	1.61296	0.577294	5.39343	10.0689	10.4295	10.9263	6.18789	5.25962	10.1259	35.3986	17.7343	1.34319	19.7503	10.0573	8.2398	0.518107	0.452047	28.9306	3.79215	0.233682	1.06309	34.4619	23.4222	17.7069	9.4975	12.2812	27.6395	19.1337	0.969537	10.6887
TCGA-A3-3347-01A-02R-1325-07	-0.0304916	2	1635.69	2423.95	4059.64	0.361523	0	0	2.74019	22.5088	34.6565	0.54191	9.68372	1.60517	5.49332	32.4126	1606.29	1.51689	0.626346	2.80252	1.20192	22.4534	7.21872	10.3758	12.0911	21.174	10.4928	16.462	52.9287	22.9055	1.77967	16.81	23.8767	14.0243	1.1573	2.78276	64.0477	7.34275	0.570272	1.12402	96.9115	19.5664	21.1984	14.7991	24.103	448.339	52.2594	2.7879	13.7772
TCGA-A3-3349-01A-01R-1188-07	0.18841	2	1368.47	1479.42	2847.89	0.520786	0	0	2.21753	8.34105	17.9115	0.168393	2.32108	0.14953	2.79672	16.1691	623.778	0.553139	22.6896	1.00053	0.0917674	17.2432	16.4899	5.65816	8.78538	5.62598	4.39069	4.72753	30.4244	8.32834	0.431281	2.37469	26.6405	7.34788	0.273432	0.681624	26.0113	2.90839	0.169573	0.588887	54.6306	22.2185	12.4505	7.03429	10.7758	20.5917	23.2499	0.16565	12.7968
TCGA-A3-3351-01A-02R-1325-07	-0.129426	2	821.194	2508.76	3329.96	0.459125	1	0	7.90246	25.569	60.9524	0.433546	9.7048	0.268777	8.52975	29.42	2307.15	2.63748	0.156403	2.50781	4.83676	22.5056	24.2952	9.55417	18.4993	9.61378	8.01598	24.0492	68.7476	23.4845	2.64213	14.4326	15.1058	14.3933	0.596877	0.374981	48.2011	8.8429	0.390788	1.48151	77.0586	28.9409	29.6127	16.1926	24.8984	19.2146	18.283	7.61108	20.2291
TCGA-A3-3359-01A-01R-0864-07	-0.185912	2	683.328	1999.51	2682.84	0.541314	0	1	3.78366	14.2954	37.3099	0.322396	8.63258	0.13442	6.39936	20.9337	1802.64	2.16533	1.09116	2.91893	1.80931	12.608	19.7636	8.85236	10.3587	5.95539	4.81928	19.4121	40.579	13.6175	0.934616	23.4815	11.246	9.65675	0.40103	0.458726	31.7353	4.19799	0.154547	1.09726	52.5811	28.54	25.7412	11.9203	15.3489	9.80348	21.8312	4.80777	15.2796
TCGA-A3-3370-01A-02R-1420-07	-0.141214	2	1088.2	2113.97	3202.16	0.475708	1	0	4.14084	18.6544	47.675	0.466925	8.08504	0.183244	7.24883	23.069	2359.33	1.88961	0.179197	3.07817	2.51784	9.1923	14.488	10.7768	11.9341	7.24308	4.96897	22.2906	55.6018	16.5442	0.759926	13.6891	9.43497	13.4579	0.963586	0.857883	43.0673	5.67116	0.213423	1.09827	48.9454	29.7226	36.0666	11.0368	16.4225	15.1576	33.6427	5.30479	15.158
TCGA-A3-3372-01A-02R-1325-07	0.216644	2	775.368	1594.54	2369.91	0.579353	0	0	3.062	12.5209	28.4538	0.294831	3.79022	0.110766	3.33065	14.7604	1242.14	0.846952	2.15497	1.50877	0.670625	3.00831	12.6293	6.19706	9.23387	5.27674	4.64923	8.8158	43.4565	13.0294	0.872302	8.96053	13.8957	9.24614	0.525454	0.737959	24.9941	3.40939	0.100139	0.756375	38.46	35.5447	25.4232	8.86216	10.5886	14.4634	12.3593	1.46462	15.6756
TCGA-A3-3376-01A-02R-1420-07	0.253019	2	1417.06	1795.2	3212.26	0.474404	0	0	4.70306	12.0074	25.5303	0.178114	6.1145	0.269388	2.68073	19.08	771.515	0.580253	2.73793	1.20719	0.247433	17.8882	14.9303	6.14206	13.5388	5.83001	8.86721	6.62071	48.9143	15.8094	0.593804	1.79214	20.8817	9.56311	0.481047	0.90427	29.6513	4.23141	0.309531	0.773947	46.0557	21.085	15.5605	8.79926	13.3765	43.4354	30.6197	0.432917	11.8015
TCGA-A3-3382-01A-02R-1325-07	-0.179044	2	564.942	1556.2	2121.14	0.608723	0	0	1.39758	12.5137	21.2829	0.261057	8.79186	0.132551	3.78438	16.3327	898.937	1.04536	0.481351	2.08637	0.741888	20.2118	8.11306	11.1012	5.88105	5.2283	2.17753	9.2504	37.9902	10.4459	0.475454	61.0847	7.77539	6.64924	0.586129	0.469649	35.3846	3.68686	0.240758	1.34759	33.7617	21.402	14.7194	8.50532	7.56593	10.7546	34.5433	2.04598	8.63832
TCGA-AK-3431-01A-02R-1277-07	0.365314	2	1430.75	1531.44	2962.19	0.506391	0	0	1.54208	5.79117	15.8075	0.130931	9.709	0.0717985	2.8414	14.9997	569.256	0.255592	2.01216	1.56082	0.205494	17.5733	9.35471	1.68276	5.40606	2.89076	6.62574	7.53899	23.2066	10.1623	0.0877967	2.22753	20.0888	6.30457	0.436543	2.84425	24.6564	1.2336	0.613696	0.719285	30.4039	23.7142	14.3939	5.37618	10.0219	10.9488	11.5496	0.354911	3.63504
TCGA-AK-3434-01A-02R-1277-07	0.00971423	2	702.828	1657.15	2359.98	0.58054	0	1	2.76646	7.2222	17.5313	0.242024	3.53564	0.153262	4.43243	12.1812	1631.06	0.825083	0.113268	2.28009	0.866931	5.29506	26.4737	3.33758	7.47085	3.6045	3.20367	14.792	19.6185	13.8304	0.253427	32.7541	11.1794	6.92368	0.861041	0.670764	27.4033	1.51025	0.862303	1.8766	24.4337	24.068	21.3016	7.19505	12.7244	11.3062	9.86365	1.36128	11.6686
TCGA-AS-3778-01A-01R-A32Z-07	0.164231	2	834.468	1274.61	2109.08	0.610127	0	0	2.42808	6.1471	25.9417	0.155194	6.94941	0.0331572	2.4744	12.4978	877.32	0.53267	0.719829	0.782845	0.634066	6.22986	18.9729	6.65275	5.94246	3.43254	2.31005	4.69624	31.6769	5.72803	0.508768	33.7703	15.331	4.23401	0.334079	0.610247	26.142	2.31205	0.246803	0.604472	27.7183	28.2384	14.9681	7.32266	9.19094	15.1865	19.9603	1.06236	7.67786
TCGA-B0-4693-01A-01R-1277-07	-0.145661	2	363.045	2021.92	2384.96	0.57755	1	1	2.29427	13.676	23.9317	0.440819	7.17027	1.65816	6.3007	13.5886	990.782	2.20075	0.148701	2.88536	1.29786	48.6334	10.4105	6.41268	8.17256	5.2788	4.8466	15.8076	45.8943	16.1189	1.04076	52.7468	12.6333	8.89668	0.748635	1.29771	30.8419	3.34798	0.335421	0.803736	35.6995	26.1234	18.5607	8.87096	17.1502	218.751	18.0302	2.26268	13.695
TCGA-B0-4703-01A-01R-1277-07	0.253504	2	1596.16	2017.26	3613.43	0.421773	0	0	3.66879	9.93523	19.7097	0.387009	7.26148	0.195174	5.72999	16.9213	1018.7	0.770352	2.33774	2.26805	0.926016	8.93256	7.76485	1.57054	10.8197	6.3468	5.12233	18.4007	33.8089	11.2572	1.11986	77.19	26.9877	10.4268	0.806708	1.14151	31.1782	7.79572	0.210927	1.62981	46.787	23.8921	27.479	13.1099	17.7947	54.7721	11.262	2.298	12.7257
TCGA-B0-4816-01A-01R-1503-07	0.368971	2	1008.05	2252.82	3260.87	0.46811	1	0	2.09162	13.2178	40.2171	0.104633	3.17185	0.0503627	3.09604	29.5847	2098	0.5743	0.523248	0.985447	1.08851	5.94209	15.071	6.69415	7.69199	9.63853	6.36352	7.96045	51.04	17.9161	2.38176	3.07352	14.9588	7.97316	0.446818	0.642605	49.3027	4.69191	0.517914	0.800189	96.5135	28.9951	15.9398	13.7174	29.9749	17.9873	14.4381	1.10422	11.4299
TCGA-B0-4818-01A-01R-1503-07	-0.086576	2	534.242	1881.63	2415.87	0.573841	0	1	2.34636	13.096	22.6644	0.517642	8.32366	4.13934	6.25331	11.886	1424.5	1.18807	191.587	2.591	1.35038	353.191	16.9888	7.37617	6.73375	4.38944	6.18352	14.6599	33.7707	19.0129	1.08491	16.5235	9.54803	7.66767	1.83322	2.06692	40.3479	2.34648	0.44383	1.94377	34.8134	33.6295	34.2525	10.3304	17.1782	1910.62	7.63616	2.17852	14.3196
TCGA-B0-4838-01A-01R-1305-07	0.251063	2	516.932	2289.6	2806.54	0.525959	1	0	4.18347	24.3542	35.0999	0.618313	4.5813	1.22301	10.6832	14.9394	2438.26	1.93183	1.37073	7.96831	2.81738	69.4163	10.3903	5.70486	9.83959	5.10032	5.16848	51.4173	46.078	25.7214	0.951085	57.5904	10.5412	13.9304	0.872291	1.14376	48.0632	5.89224	0.146075	0.669615	48.917	24.2197	37.1635	14.7508	25.6557	204.897	8.80033	10.0807	10.87
TCGA-B0-4846-01A-01R-1277-07	-0.216309	2	872.281	1915.42	2787.7	0.528308	1	0	4.38834	17.7253	48.3913	0.345074	6.29394	0.134532	5.82904	18.0643	1659.32	0.637749	0.0670312	4.49946	2.0676	7.6564	13.4518	12.0794	11.2295	5.52415	3.2171	19.3267	46.8851	18.0133	1.52283	12.9393	10.0518	8.8687	0.800732	0.955072	36.1789	3.42973	0.0648004	1.59325	44.8931	29.3715	37.4869	10.7071	16.9063	16.4618	9.61979	2.73883	18.3856
TCGA-B0-5077-01A-01R-1334-07	-0.091502	2	350.872	1382.84	1733.71	0.652834	0	0	2.07512	6.84935	13.6529	0.176563	1.08155	0.253282	4.03356	9.80654	1614.15	0.541086	0.30418	1.04397	0.395876	7.07427	11.6379	6.64998	7.21536	4.18413	2.76208	9.4179	32.9825	7.31013	1.67526	38.9733	14.7878	5.97483	0.627226	0.583425	22.2944	2.15687	0.285009	0.799145	35.3767	27.8608	24.8391	8.29963	10.1956	41.4928	9.76714	1.00195	8.90526
TCGA-B0-5080-01A-01R-1503-07	0.474179	2	1513.46	1934.24	3447.7	0.443704	0	0	1.38668	8.99492	11.4064	0.56919	12.932	2.84209	9.69722	10.1452	757.884	1.10285	9.99529	2.36197	0.104062	6884.72	6.52981	0.590931	6.65766	4.63835	16.3349	20.6694	22.4449	11.7612	0.191521	50.9326	33.8698	9.26049	1.49468	0.941409	27.9518	2.79369	1.23713	2.68048	31.4229	29.461	21.6877	9.8574	18.6389	1708.84	8.99449	1.00344	7.04945
TCGA-B0-5081-01A-01R-1334-07	0.219376	2	1310	3004.41	4314.41	0.32641	0	1	2.05281	24.7351	21.0411	1.03763	16.5179	4.24059	17.8994	23.346	3262.61	3.0297	1.08399	6.48052	3.99596	1450.92	6.83174	3.62891	9.38573	11.0226	10.3284	47.2264	50.4693	26.7683	3.44137	75.1546	20.0447	18.062	3.11078	4.48209	65.088	5.75782	0.633274	5.48336	108.051	29.1645	36.5342	19.34	43.7004	642.928	14.9422	7.33412	15.3554
TCGA-B0-5095-01A-01R-1420-07	0.378064	2	1501.77	1582.71	3084.48	0.490831	0	0	1.62646	8.50378	13.1371	0.15975	3.61203	0.393212	3.84709	11.0239	753.65	0.389812	0.918482	1.25803	0.557165	67.7859	11.1145	4.41545	6.62102	4.59859	4.99161	9.1456	17.2687	8.02555	0.981944	23.3472	31.2308	9.32995	0.600936	0.969955	21.8101	2.18638	0.292489	0.639919	34.9211	10.2177	11.2827	8.8652	11.0449	20.3736	12.2839	2.11276	11.2594
TCGA-B0-5097-01A-01R-1420-07	0.283748	2	1697.12	1941.31	3638.43	0.418443	0	0	2.18341	12.6232	16.5659	0.247838	28.1431	0.140183	4.60166	16.2785	777.73	0.687065	2.40371	1.61819	1.67892	7.84933	5.48129	2.63367	8.20048	8.80253	5.19881	10.547	48.5893	8.03631	0.703109	6.37185	28.7006	11.1793	0.775972	1.15754	35.1306	3.45572	0.321131	2.34679	62.8045	18.9522	8.91342	8.22807	9.32203	37.3002	55.6376	1.09189	5.28931
TCGA-B0-5108-01A-01R-1420-07	0.307375	2	1664.6	2589.91	4254.51	0.334709	0	0	1.79966	18.8784	15.7728	0.226757	27.1296	1.26266	6.77412	23.3204	1933.86	0.732403	5.71387	2.33709	1.87271	105.467	8.00982	3.82258	7.55498	13.0835	5.84516	20.1414	76.4118	14.5654	2.17401	9.9736	22.8612	17.2366	2.17864	2.20519	57.9918	5.98948	0.664278	1.72363	118.466	31.0025	20.8117	14.644	14.5801	132.838	57.6912	2.731	6.72085
TCGA-B0-5110-01A-01R-1420-07	0.077818	2	1043.77	1296.48	2340.25	0.582895	0	0	2.81593	9.22111	19.5057	0.204553	2.62061	0.126253	2.8095	11.4389	904.22	0.599698	0.706308	0.992144	0.365207	6.74454	16.1828	8.47162	8.15936	4.92582	4.82351	8.40761	22.0343	8.58567	0.899916	25.9976	16.9627	8.67718	0.417557	0.814851	26.0475	2.763	0.328152	0.445928	35.9925	26.449	18.158	6.74388	9.41864	6.78132	17.2188	0.749523	11.1921
TCGA-B0-5113-01A-01R-1420-07	0.00236873	2	861.353	1715.82	2577.17	0.554291	0	0	1.97353	15.0176	30.5509	0.461683	6.19395	0.789109	5.40394	15.8081	1248.65	0.829454	0.392591	2.32638	1.8762	183.573	15.0216	10.6946	6.82655	6.35568	5.01092	16.1292	41.0837	17.6521	1.25922	13.6282	9.39349	8.83371	1.18162	0.756422	33.7617	3.67573	0.434729	2.13037	35.554	24.9492	26.6942	9.14257	14.1446	265.342	20.6796	1.76619	12.2269
TCGA-B0-5115-01A-01R-1420-07	0.205108	2	873.611	1488.02	2361.63	0.580343	0	0	2.94156	9.68795	21.0091	0.291843	7.6718	0.0912017	4.88558	9.46584	1303.25	0.575596	4.12961	1.47233	1.27614	5.75515	20.4917	6.63594	7.65073	3.86279	3.5753	9.91729	35.5971	9.87046	2.47948	0.809385	12.4395	7.35155	0.871383	1.03439	23.4973	2.20753	0.127604	2.60565	28.6491	21.0042	26.4514	9.19087	11.1942	14.3957	4.27176	0.327557	9.44667
TCGA-B0-5119-01A-02R-1420-07	0.021514	2	640.493	1254.84	1895.33	0.634682	0	1	3.50673	8.33486	43.9255	0.0540497	0.939756	0.0561348	3.97469	9.41715	1021.74	1.1498	0.0974931	1.84869	0.196366	0.265423	20.6009	7.3916	10.6175	2.69243	1.60102	10.7111	20.098	9.78857	0.402704	5.76074	10.4442	5.21806	0.167727	0.352484	29.0366	2.42607	0.448623	0.504045	33.5973	27.2083	23.8448	6.29758	10.3582	1.7661	19.2156	2.07163	16.4465
TCGA-B0-5120-01A-01R-1420-07	0.349865	2	1297.88	1525.3	2823.18	0.52388	0	0	3.20407	7.03418	26.2834	0.167942	4.40837	0.219487	2.82943	22.0834	1110.13	0.32716	9.60856	0.808208	0.696553	16.309	12.1098	3.78553	9.9268	6.90476	2.85116	8.24538	32.3864	12.2777	0.574909	6.88968	13.7497	6.59502	0.53852	1.13912	34.7955	3.29884	0.345717	1.13595	38.5745	33.787	8.11717	7.82233	9.01901	33.089	43.4396	0.420705	7.5745
TCGA-B0-5690-01A-11R-1541-07	0.404979	2	907.061	1625.06	2532.12	0.559783	0	0	2.21095	8.60849	19.2482	0.183704	3.88121	0.253048	3.70937	6.27742	754.634	0.392003	5.06456	0.977513	0.168608	25.5042	14.0368	3.44257	8.17051	2.90308	7.03092	5.42879	33.4073	10.7562	0.439427	2.23989	24.9027	11.2875	0.502388	0.600097	19.5308	1.89401	0.552318	0.963951	37.2837	31.9469	23.3354	3.99178	14.0822	9.16833	5.21139	0.295901	7.67717
TCGA-B0-5691-01A-11R-1541-07	-0.0691543	2	1251.24	1397.43	2648.67	0.545524	0	0	5.11992	12.6097	46.8384	0.476679	9.05774	0.677952	3.48495	11.0001	1041.05	0.400002	21.6371	1.60784	0.501204	78.5196	21.0451	6.79378	16.9517	3.72475	9.23463	8.04181	26.0324	12.1575	0.261144	12.9072	14.2954	6.14984	0.704204	0.454002	25.6792	2.92333	0.349105	1.34072	31.669	17.4653	15.4382	6.98585	11.3485	158.525	16.0453	0.992994	14.0555
TCGA-B0-5699-01A-11R-1541-07	-0.178732	2	118.392	1468.59	1586.99	0.668997	1	0	3.10766	9.76153	24.3616	0.148077	3.9642	0.0347384	3.37552	10.9881	1084.96	0.601671	0.320516	1.00551	0.645568	3.03924	34.6876	10.1536	14.6396	3.80437	3.81703	7.52797	30.9838	10.343	0.395879	42.828	11.4092	5.24112	0.603466	0.681658	25.8549	2.60193	0.867578	1.14313	36.0106	16.5472	23.4128	9.58764	13.6023	8.39913	4.54535	0.67025	27.8606
TCGA-B0-5705-01A-11R-1541-07	-0.310209	2	411.64	1492.57	1904.22	0.633673	1	0	2.72147	10.7813	23.5286	0.362062	2.29137	0.182317	5.03329	11.431	2821.96	0.31852	1.66237	2.14674	0.605877	12.2389	19.5819	9.89333	8.54892	4.40245	3.3938	12.3369	33.3954	11.5239	0.201638	4.43039	10.8907	6.54754	0.747451	0.552668	27.3988	3.12894	0.0749956	0.513442	33.3668	26.64	47.3706	7.58514	14.5282	46.8832	11.8297	2.32805	15.7454
TCGA-B0-5706-01A-11R-1541-07	0.089626	2	744.508	2329.89	3074.39	0.49212	0	1	1.92796	19.915	20.0125	0.849284	5.66642	20.0401	10.508	9.62167	1730.09	1.45749	100.552	7.0994	2.23331	5844.47	4.26752	2.76751	8.07583	4.5139	7.1328	22.2328	62.3802	26.0496	0.602638	9.36906	13.5791	8.93702	2.43996	2.87388	39.583	4.226	0.236949	0.548576	58.472	15.5806	28.6342	14.9494	17.936	9477.88	13.9149	7.59124	12.0087
TCGA-B0-5709-01A-11R-1541-07	0.227479	2	1645.07	2625.24	4270.31	0.332522	0	1	5.05771	30.8068	56.0026	0.983877	21.806	1.61185	10.7612	26.8659	2919.77	1.50638	55.2198	4.17449	0.760313	117.956	12.9965	7.26251	15.4122	9.10715	15.8922	25.6995	73.7168	25.1071	0.563442	15.2233	17.1624	12.3897	1.86114	0.832951	60.1912	8.6482	0.723387	3.17158	77.2994	15.9125	42.7603	14.3799	32.766	235.7	38.9869	4.58157	21.1874
TCGA-B0-5710-01A-11R-1672-07	0.362622	2	834.065	1439.6	2273.66	0.590809	0	0	3.14655	9.07073	17.2393	0.182544	5.28265	0.116668	3.46707	7.72133	1177.93	0.33737	0.435646	1.45497	0.416282	2.89614	19.0673	1.73163	5.20743	3.00589	3.46085	9.0077	23.0382	9.27849	0.174368	60.6214	19.6492	9.51925	0.855282	0.429449	19.2011	1.82843	0.411353	2.02851	32.7058	27.4937	28.3166	8.29089	8.75338	26.2935	4.07527	0.605731	15.4678
TCGA-B0-5812-01A-11R-1672-07	0.0405874	2	1199.58	1591.68	2791.26	0.527865	0	0	4.78452	11.4394	38.5668	0.195118	4.65476	0.27965	3.66815	11.9945	902.544	0.500532	1.82133	2.07941	0.191396	20.9726	20.8694	6.19451	11.0885	3.55827	5.40463	13.238	37.901	16.8051	0.181719	18.1378	12.932	7.97256	0.753345	0.318115	26.7906	2.30844	0.381063	1.09175	39.7529	23.1697	16.3441	7.32829	9.0675	89.1932	8.87781	0.398097	12.5098
TCGA-B2-4101-01A-02R-1277-07	0.0948344	2	868.311	2237.87	3106.18	0.488053	0	1	2.94457	17.8351	31.6359	0.686622	16.5196	1.94473	7.34335	20.1865	1270.25	1.98572	1.54125	2.50199	1.42798	153.423	13.1007	6.4367	9.2159	6.48597	5.72723	18.8817	46.2788	16.6707	0.295577	27.5789	13.8191	10.8604	1.67815	1.4274	39.8937	4.21578	0.789677	1.71785	39.9277	24.4286	23.0756	12.3856	17.5448	551.4	19.9289	2.89076	12.2542
TCGA-B2-4102-01A-02R-1325-07	-0.11532	2	727.898	2061.26	2789.15	0.528127	1	0	5.95446	19.0511	53.2012	0.440265	8.086	0.499027	4.16658	29.4499	1359.97	1.26655	1.77552	1.35667	0.783928	30.5366	23.5847	13.7895	17.5797	8.28748	6.30001	12.9086	57.1582	21.3918	1.08421	24.1901	11.3212	9.41336	1.05954	0.500241	49.4476	5.86572	0.325831	2.22534	57.6381	24.4422	18.7897	12.1954	20.102	129.612	18.1059	0.640269	28.8533
TCGA-B2-5633-01A-01R-1541-07	0.0963741	2	1012.83	1812.94	2825.77	0.523555	0	0	2.92575	14.2189	35.8131	0.274105	5.47107	0.178234	3.9784	18.9521	1347.15	0.572664	0.0773876	1.37573	0.519568	27.0196	12.4069	2.98945	9.20595	7.25224	4.18766	11.9923	62.0301	12.8117	0.230863	9.38993	18.6668	8.60629	0.841142	0.884403	32.9598	5.44675	0.349123	1.23667	51.5092	28.1408	11.6316	10.6264	13.7759	90.5029	27.9454	0.969139	9.22245
TCGA-B2-5635-01A-01R-1541-07	-0.072833	2	673.033	2197.32	2870.35	0.517969	0	1	5.64492	15.2054	42.1266	0.422039	3.10969	0.079482	6.72377	22.285	2999.53	1.02807	0.385705	1.88932	0.866821	19.4162	21.0946	6.11709	15.9896	8.17954	5.03233	20.5373	37.6866	13.429	0.545039	44.5179	10.8267	8.72326	0.787835	0.759259	44.4079	6.04421	0.370906	1.30715	68.1767	30.9888	38.42	10.6324	30.9714	20.9763	16.1733	3.00148	24.5065
TCGA-B2-5636-01A-02R-1541-07	0.253407	2	846.638	937.373	1784.01	0.647224	0	0	3.79333	5.93864	13.9331	0.146744	0.972825	0.385281	1.29982	9.84913	594.108	0.117523	0.995245	0.428106	0.085301	13.0243	10.5531	0.930969	10.5136	3.90759	3.22522	2.44492	18.1095	5.50718	0.102045	0.306905	16.4523	5.07515	0.203332	0.501595	20.2052	2.486	0.27226	0.34834	26.9569	25.97	9.73064	3.98034	7.68126	180.799	23.8701	0.136869	6.14491
TCGA-B2-5639-01A-01R-1541-07	-0.230381	2	435.455	1779.52	2214.98	0.597737	1	0	3.61723	11.8635	34.8239	0.362555	2.49836	0.710637	5.18207	14.6502	1817.1	0.519676	7.77624	1.40502	0.689726	41.4648	14.7989	12.539	12.1431	3.97063	5.75721	11.1945	43.8427	15.2167	0.380633	67.9052	11.0759	6.26584	0.734992	1.26743	31.2391	3.94907	0.651742	1.74361	57.9238	24.0738	33.2791	11.6443	17.9238	202.756	9.32805	0.691684	21.9712
TCGA-B2-5641-01A-01R-1541-07	-0.224071	2	788.802	2445.05	3233.85	0.471612	1	0	4.17328	21.4345	51.8122	0.671404	2.65849	0.2942	9.451	21.3577	3164.36	2.51728	3.34159	3.42659	1.45423	29.6107	9.00348	9.15426	11.0236	7.93736	9.48024	27.637	86.0355	22.4332	0.490679	43.1475	13.8759	11.9099	0.592554	0.807814	53.1158	8.5919	0.33825	0.539474	64.5359	24.6004	39.3502	13.3748	28.7087	32.7837	31.7806	6.2971	19.3575
TCGA-B2-A4SR-01A-11R-A266-07	0.325654	2	661.332	1527.43	2188.76	0.600819	1	0	3.91451	10.9254	20.6607	0.761879	9.4987	0.5404	4.07629	11.843	792.405	0.460694	7.52611	2.15272	1.17703	3.259	16.1992	7.66081	9.81046	3.82245	4.72422	11.1802	40.0253	10.2548	0.312397	21.7912	8.04998	7.13721	0.823638	0.855501	25.2111	2.73511	0.40444	0.998771	31.1207	17.6321	16.6947	9.99979	11.7164	19.1493	13.1673	2.06565	10.0385
TCGA-B4-5378-01A-01R-1503-07	0.2589	2	394.439	561.433	955.872	0.734886	0	0	10.3453	4.01378	14.8228	0.103494	1.20664	0.0191086	0.988869	7.5492	389.332	0.103606	2.64668	0.266067	0.0467909	8.66069	30.6612	0.508213	21.709	1.79617	2.55857	2.10159	12.4985	3.78211	0.199913	0.406999	13.3681	4.03767	0.159336	0.155156	17.7205	1.18183	0.190892	0.155982	17.9342	16.33	10.9419	4.7045	4.02058	15.6739	14.9096	0.154178	12.2087
TCGA-B4-5844-01A-11R-1672-07	0.375116	2	701.251	1018.11	1719.36	0.654429	0	0	4.65743	5.74648	18.0992	0.0522935	2.07656	0.0331789	1.48435	4.37639	476.522	0.399764	1.69785	0.523674	0.124354	3.19217	15.7504	4.71916	11.2383	1.28042	3.83111	2.66928	27.0572	7.93096	0.191267	7.74371	15.9548	5.54143	0.152328	0.243746	11.086	1.01853	0.125339	0.377237	25.3603	23.5984	12.2032	4.45261	5.9246	9.6246	2.63343	0.232786	9.22999
TCGA-B8-4622-01A-02R-1277-07	-0.0238079	2	795.278	2006.84	2802.12	0.526511	0	0	1.76236	14.8082	29.3253	0.238204	7.28181	0.157471	4.27724	21.756	1087.65	0.82425	0.448346	1.73471	1.09267	31.214	16.1688	10.4227	7.69858	6.78153	4.05369	12.1092	40.8471	16.9176	0.679042	36.4893	15.4378	8.05522	1.05386	1.076	35.5367	4.18681	0.849512	2.10725	42.0819	34.8568	17.0006	12.1757	13.5752	43.0127	16.8522	0.914655	13.8542
TCGA-B8-5158-01A-01R-1420-07	-0.105764	2	666.216	1965.3	2631.51	0.547634	0	0	1.60561	16.495	27.5091	0.225586	2.5438	0.847067	4.84238	16.729	1274.52	0.40431	1.84289	1.43849	0.304562	12.4754	5.63079	6.18576	14.7068	6.67825	6.20497	13.2993	53.666	15.7237	0.520493	71.9023	16.2865	11.8675	0.567175	0.490931	44.9073	5.49748	0.234495	0.629267	73.3135	25.173	14.1433	11.445	18.7371	172.89	37.6239	1.2917	14.5147
TCGA-B8-5163-01A-01R-1420-07	0.212649	2	1837.14	2597.39	4434.54	0.309693	0	1	10.9853	27.108	47.296	0.657204	10.8719	1.6488	10.1434	30.1304	2840.92	1.12917	1.99816	3.69007	0.703638	91.5303	22.124	3.70115	30.499	10.0267	10.6207	32.0651	78.5286	24.2161	0.423611	57.4558	23.8925	17.2524	1.91127	1.0146	62.046	7.74402	0.492509	3.58866	92.0011	25.8931	25.8169	13.2889	21.5948	759.31	58.9849	2.59267	31.2687
TCGA-B8-5165-01A-01R-1420-07	-0.0481605	2	1159.89	1180.89	2340.78	0.582832	0	0	5.46275	9.63898	27.8978	0.155762	6.60651	0.349425	2.38984	12.83	603.235	0.278448	9.20741	1.31511	0.381573	52.1285	19.8603	6.5667	14.2159	3.09006	4.06543	7.66791	33.1646	9.0589	0.143684	11.5539	10.9226	6.32543	0.497814	0.160126	20.5002	2.5826	0.1521	0.664033	27.9193	13.3418	9.48864	3.67918	7.29871	67.5152	22.242	0.642084	10.5679
TCGA-B8-5545-01A-01R-1672-07	0.276162	2	1504.28	1773.28	3277.57	0.465943	0	0	5.50727	12.3261	34.8289	0.330978	4.44494	0.486076	3.45171	22.6974	1077.25	0.376112	33.2549	1.28235	0.304191	35.2767	16.4853	4.89331	15.1948	8.12946	8.10088	8.94237	55.9383	13.6945	0.273259	11.8835	23.8425	9.75375	0.588755	0.531067	43.1672	4.3898	0.262052	0.709834	55.3871	20.1083	21.2884	8.43197	12.9813	158.948	56.3453	0.547533	11.8125
TCGA-B8-5549-01A-01R-1541-07	0.0871533	2	650.923	1619.19	2270.11	0.59123	0	0	3.09969	10.4643	36.1516	0.231071	2.31752	0.0668118	4.04748	11.9725	1283.73	0.735602	0.910287	1.45051	0.652791	14.1757	14.2631	8.87476	9.04484	3.81251	4.53311	11.743	41.7557	10.1341	0.316779	21.8474	9.93308	6.2431	0.148081	0.124711	27.8459	3.85448	0.16246	0.150449	36.9534	19.1272	26.4234	6.98098	9.40029	22.4847	29.4328	2.69131	10.7202
TCGA-B8-5550-01A-01R-1541-07	0.099806	2	1487.18	1459.9	2947.08	0.508302	0	0	1.63096	8.4316	24.9658	0.155312	4.30386	0.0238232	2.48025	13.8393	1787.86	0.25116	0.633561	0.54985	0.187507	4.1593	3.45648	1.81394	8.33475	5.94036	3.77659	7.51045	37.9578	8.86776	0.178026	28.3836	24.2439	6.21612	0.398332	0.531954	25.2375	3.40599	0.0874966	0.692788	41.7399	13.1701	28.3025	8.1372	10.0152	4.44551	21.8676	1.17002	6.38373
TCGA-B8-5552-01B-11R-1672-07	0.258816	2	1504.81	1959.17	3463.97	0.441561	0	0	4.05153	14.0254	42.6502	0.460832	11.3066	0.655237	4.62767	18.4116	1200.11	1.31179	2.9057	1.78986	0.761702	60.7318	14.6542	6.19909	9.76757	7.72768	8.39412	13.2618	61.8414	14.3786	0.435904	7.0109	13.962	7.61393	0.78429	0.475802	51.2177	4.53292	0.481303	1.28009	54.1876	22.055	15.2198	10.3829	14.1852	37.582	45.4662	0.890006	10.7629
TCGA-B8-5553-01A-01R-1541-07	0.253897	2	847.034	1920.19	2767.22	0.530858	0	1	2.89917	15.3299	52.688	0.369946	6.27199	0.336973	4.74845	23.0519	1738.61	0.562378	18.2592	1.68851	1.33806	59.5652	7.41215	6.74504	8.01176	6.62975	5.4404	15.1955	58.1233	19.3298	0.265424	32.8333	12.7963	10.0509	0.680307	0.591593	37.7073	5.64058	0.33449	0.771304	37.2557	21.0278	27.4602	7.75467	13.0061	50.107	60.0345	3.57829	6.49872
TCGA-B8-A54F-01A-11R-A266-07	0.224217	2	894.422	1506.15	2400.57	0.575678	0	0	1.78902	9.00756	21.6055	0.129358	4.68242	0.257949	1.62325	30.1153	900.339	0.194248	4.64332	0.878397	1.4475	15.2459	11.8618	4.08952	8.87773	7.27836	1.15538	5.00835	31.1813	10.4249	0.353394	19.3283	13.771	6.00769	0.364084	4.74166	33.1663	3.7287	0.884223	1.31601	61.9296	27.3941	8.36761	11.4374	14.4735	77.291	60.4962	0.791785	15.0245
TCGA-B8-A54H-01A-11R-A33J-07	0.0954581	2	490.28	1485.41	1975.69	0.625522	0	0	1.81461	11.1479	16.3692	0.181943	1.24815	0.0647869	7.73735	7.06164	1127.68	0.970175	0.691193	3.07046	0.265483	11.8387	12.4478	10.0177	8.86268	3.45779	2.23669	14.7249	23.1951	9.46079	0.724826	59.9096	14.8792	6.08486	0.311914	0.691381	22.4655	2.57402	0.152285	0.46841	27.4406	32.8274	25.5021	9.60419	19.6879	12.7172	5.31574	2.67535	16.7965
TCGA-B8-A8YJ-01A-13R-A39I-07	0.520615	2	1761.34	2246.06	4007.4	0.368662	0	0	2.94877	11.9146	27.629	0.51099	29.8985	3.16974	5.97281	15.5621	1093.53	0.976583	10.4195	1.5071	1.61005	264.272	9.50745	2.12091	10.3239	8.14702	20.4039	13.9877	41.7517	11.4693	0.79605	1.107	29.6213	12.0465	1.28231	1.86469	46.3097	4.48167	1.36085	2.67013	61.4181	10.8399	11.7679	7.36174	16.7914	590.864	70.876	1.72633	6.39639
TCGA-BP-4162-01A-02R-1325-07	-0.200971	2	636.503	2264.32	2900.82	0.514138	0	1	3.45217	20.2695	47.3011	0.417436	4.26816	0.221972	8.93572	21.6286	2266.18	1.11994	0.783075	4.04817	2.76622	20.8357	15.1705	11.7453	8.98287	6.42213	5.70865	26.9496	89.3592	20.8449	1.45141	58.5472	9.078	11.0326	0.602507	0.630822	45.912	4.96781	0.407623	0.577555	60.9193	16.3914	36.4716	10.6345	18.6885	25.8324	17.1928	5.47028	17.894
TCGA-BP-4166-01A-02R-1289-07	0.244517	2	1138.06	1611.46	2749.52	0.533058	0	0	1.36806	6.78018	17.8218	0.19819	4.87977	0.362271	4.00056	12.0167	821.532	0.39681	7.67777	1.3803	0.17724	29.4342	7.15576	3.11023	3.8094	2.87713	3.39208	11.7044	38.3347	9.80175	0.128733	20.4185	22.7165	6.73018	0.563315	0.795381	22.3372	1.44003	0.312628	1.065	37.4774	13.7839	17.9007	6.27517	7.82199	182.751	10.7819	0.568778	4.92188
TCGA-BP-4169-01A-02R-1289-07	0.329417	2	1593.86	2364.07	3957.93	0.375403	0	0	5.43987	16.6743	32.2825	0.483824	16.3078	1.2713	5.21562	21.8465	1254.04	0.998968	3.68718	2.21052	1.40035	135.183	12.5292	2.32652	18.0549	8.60318	16.7519	10.6386	49.7154	17.0556	1.99265	3.24321	17.4488	12.5055	1.0504	1.20588	46.0253	4.23623	0.187012	1.17584	70.0965	18.2808	20.7874	8.90703	16.545	182.397	40.1108	1.73337	10.4278
TCGA-BP-4330-01A-01R-1289-07	-0.144249	2	956.803	2540.34	3497.15	0.437187	0	1	4.2066	24.5781	48.6102	1.6509	7.92217	4.0829	12.5056	25.981	2455.42	2.32183	24.212	4.97628	1.90292	196.27	19.43	6.87657	9.61449	8.34784	9.194	38.8161	64.8829	29.8085	1.51803	31.9881	10.6235	13.4951	2.18639	1.61902	60.5257	7.23528	0.495424	2.17928	58.3871	29.0834	38.3158	15.4113	27.3583	623.034	24.446	7.42203	12.3436
TCGA-BP-4337-01A-01R-1289-07	-0.0188891	2	1068.64	1207.02	2275.66	0.590573	0	0	0.62738	3.85949	5.22507	0.318481	5.97308	1.26052	2.84773	8.82591	739.022	0.304334	1.89051	1.19417	1.32115	236.182	5.01972	0.724404	4.45399	4.75889	5.99677	8.07517	10.5148	6.73295	1.38778	18.5384	17.8237	4.66434	0.585047	1.57563	14.1088	1.37293	0.494763	1.0211	34.162	20.1694	13.6586	7.94726	8.57011	457.617	7.69997	1.86499	10.0504
TCGA-BP-4342-01A-01R-1289-07	-0.0237196	2	883.101	1381.4	2264.5	0.591895	0	0	1.68702	7.94115	9.684	0.236897	7.28064	0.474325	4.33005	13.0063	1044.1	0.746451	0.748138	1.24237	0.866869	21.7109	4.34492	2.14267	3.24006	5.27267	3.05064	10.0734	19.6652	7.27577	1.11689	10.4589	19.943	7.4939	0.911429	1.51959	21.5639	2.45715	0.591594	1.81741	29.9363	24.397	11.0112	6.70445	10.7556	37.9138	25.2868	1.54849	5.15153
TCGA-BP-4344-01A-01R-1289-07	0.289642	2	1296.34	1498.36	2794.7	0.527436	0	0	3.66243	7.15958	30.6138	0.145262	3.16371	0.108623	1.89251	16.9026	747.168	0.334464	0.503075	0.474927	0.253317	15.731	15.0799	6.30804	7.44161	5.67574	4.40137	4.60588	35.0274	17.3827	0.432916	0.175272	13.4727	7.64083	0.398361	0.26133	25.1562	2.33589	0.326248	0.886681	38.2348	26.8764	20.1096	7.93831	11.1096	12.5928	12.3734	0.186293	11.9232
TCGA-BP-4345-01A-01R-1289-07	0.471706	2	1897.56	2184.05	4081.61	0.358515	0	0	1.59114	8.24102	9.12249	0.249314	13.2352	0.25286	6.0492	15.2275	1243.38	0.774572	0.502429	1.91997	0.832062	27.3771	7.58237	1.77963	7.76959	7.9409	4.25721	15.9484	49.8286	11.6349	1.71663	14.6469	35.9698	11.265	1.26567	1.56596	31.3783	2.16861	0.604436	2.02909	71.2486	21.3062	16.4038	10.8027	11.8429	57.203	16.0119	0.819389	5.9172
TCGA-BP-4769-01A-01R-1289-07	0.337299	2	754.221	123.796	878.017	0.742588	0	0	1.47053	1.1537	11.5642	0.0679774	1.70919	0.0968225	0.553741	2.31244	415.949	0.0583295	0.336317	0.131884	0.084674	8.95286	6.69316	0.126678	4.91251	1.0231	1.03423	1.40058	11.9092	2.07059	0.209825	0.644451	22.6637	2.91665	0.0925087	0.314468	10.037	0.413609	0.0995691	0.316141	11.7686	13.7882	6.29917	3.77645	1.78735	12.5112	1.43595	0.101897	3.88628
TCGA-BP-4771-01A-01R-1289-07	0.0780709	2	1134.71	3153.83	4288.54	0.329998	0	1	4.28592	31.1986	33.7645	1.43271	16.3181	0.882777	27.674	24.1909	3409.18	3.41429	2.92731	6.95769	5.40225	55.3674	7.71573	4.70507	11.3543	13.1176	13.5088	88.266	71.4486	31.151	3.68414	24.9666	15.2777	21.0815	2.14842	2.81698	69.5366	8.9844	0.507611	2.89789	99.7927	20.6946	62.7676	24.523	62.6136	66.3873	16.7454	28.7139	16.6605
TCGA-BP-4781-01A-01R-1305-07	-0.26373	2	877.859	1297.86	2175.72	0.602348	0	0	4.69887	7.00605	22.4273	0.123612	0.994317	0.0958577	1.37373	15.6046	850.826	0.192494	0.554942	0.835924	0.0718545	26.6523	15.2599	9.07966	12.9543	6.32277	7.26098	4.5263	52.8869	11.9264	0.38204	12.7385	12.989	7.10768	0.237888	2.13734	39.2384	4.49077	0.201177	0.456445	51.0054	11.1655	14.3472	7.7116	7.5681	25.3886	27.0468	0.544442	10.9451
TCGA-BP-4782-01A-02R-1420-07	0.218053	2	832.019	1895.71	2727.73	0.535763	0	1	1.69681	10.5007	15.665	0.301135	5.13314	0.14129	5.62895	17.8789	1284.31	1.10388	0.268394	2.16512	0.679593	23.7202	12.0847	5.13662	10.2724	7.83001	3.63489	18.3905	56.9613	13.2746	0.31675	27.1656	17.0574	9.14428	0.59444	1.05163	39.6864	3.0915	1.02487	0.991151	58.2022	18.0824	22.9326	10.9434	12.9269	22.5381	37.5376	2.22269	15.3229
TCGA-BP-4784-01A-01R-1305-07	0.330052	2	713.997	699.242	1413.24	0.687733	0	0	2.30754	1.44718	6.99508	0.210617	2.57279	0.422426	0.970758	5.23451	335.155	0.161811	1.31464	0.20695	0.119582	54.0511	9.53103	0.305853	7.29506	1.51892	1.46859	2.82569	14.8146	4.15124	0.0802861	0.307319	23.9046	4.24957	0.241782	1.58612	11.2567	0.521189	0.143488	0.189353	15.3281	29.4947	8.74757	2.9434	2.97032	202.835	5.2957	0.10279	5.53092
TCGA-BP-4789-01A-01R-1305-07	0.304062	2	994.157	823.778	1817.93	0.64342	0	0	2.27842	4.61951	19.0763	0.127208	3.19184	0.0429588	1.9446	6.24533	393.125	0.35739	0.417458	0.482983	0.221834	3.66538	16.3973	4.521	5.90571	1.60334	2.55534	4.77074	15.96	4.7518	0.152868	8.68448	18.9017	5.27327	0.25231	0.420791	10.2985	1.02746	0.264464	0.434162	18.2236	26.367	14.3015	3.6466	4.76203	7.2241	3.59888	0.143525	7.78923
TCGA-BP-4795-01A-02R-1420-07	0.137592	2	1421.36	1628.16	3049.52	0.495296	0	0	3.54373	9.86324	26.5832	0.364039	9.3446	0.800878	4.77551	10.1247	739.345	0.522883	4.55653	1.17628	0.255315	82.3854	12.0728	0.472171	9.9145	3.27885	9.92077	9.55798	20.9987	12.9697	0.0884453	0.697066	19.8738	6.0341	0.71962	0.448476	28.5122	2.48656	0.428896	2.00472	35.7678	16.2787	8.72874	6.05434	12.0821	67.8246	14.2061	0.19376	6.70969
TCGA-BP-4797-01A-01R-1305-07	-0.0801705	2	1038.28	1960.64	2998.91	0.501735	1	0	2.54751	14.0971	30.9245	0.546931	8.89053	0.181183	4.88364	18.5237	1530.08	0.720611	0.9929	2.15112	0.38151	19.5349	10.1862	6.77613	9.35186	5.5423	7.492	19.9291	52.6898	15.9224	0.389094	45.0195	13.5913	8.63676	0.632549	0.742718	41.9453	4.69586	0.382466	1.06257	45.3063	12.0695	23.224	9.59749	13.6478	69.4049	15.4262	1.38227	12.6074
TCGA-BP-4801-01A-02R-1420-07	-0.0231659	2	1505.03	1974.77	3479.8	0.439476	0	0	2.7754	11.4598	24.943	0.152661	4.07923	0.0956735	3.91663	23.5545	1697.48	0.458478	1.52945	0.809557	0.220582	5.70203	9.48364	4.8764	9.54895	10.4252	5.1246	9.24877	158.339	15.4016	0.649953	12.7887	12.2758	8.03595	0.370176	0.38842	53.3686	6.0348	0.396106	0.843096	85.578	19.5712	12.8866	11.9616	12.4805	12.6001	50.3539	0.564463	11.425
TCGA-BP-4803-01A-01R-1305-07	-0.00122971	2	892.604	1282.73	2175.33	0.602393	0	0	0.742567	5.92059	12.7324	0.187375	3.68393	0.133745	2.55558	11.4374	764.802	0.383681	0.691323	0.629749	0.207936	30.1799	8.37868	6.83733	3.68645	4.52942	1.61193	10.3145	25.779	10.1666	0.228446	24.5919	17.5732	5.72025	0.483117	0.643539	23.0025	2.0385	0.112277	0.823144	31.0138	29.6495	5.77577	6.4264	6.85859	31.283	10.6005	0.417052	5.32747
TCGA-BP-4804-01A-02R-1305-07	0.238666	2	1380.7	2578.94	3959.64	0.37517	0	1	3.5577	14.7344	27.6509	1.05063	8.57026	0.665403	10.4256	25.7281	3775.63	1.15099	0.743736	5.15499	1.67084	54.8727	13.8375	4.71394	5.50397	9.5403	8.97368	40.1425	56.3054	24.4642	0.640015	58.3454	17.6406	13.1081	1.55649	2.46072	46.3091	4.22435	0.290359	1.51924	71.2086	35.1691	42.2336	13.9127	30.6828	207.064	15.9861	5.41965	15.3575
TCGA-BP-4961-01A-01R-1334-07	0.154521	2	924.334	1027.28	1951.62	0.628275	0	0	2.15266	6.15493	12.749	0.20245	8.53002	0.133481	2.16202	11.4986	461.75	0.294198	0.346325	0.670114	0.165135	10.7401	12.433	5.09886	8.085	3.35189	2.85296	4.91073	19.6554	5.08045	0.165435	7.17065	16.3348	5.83598	0.29692	0.255537	17.3476	1.88524	0.286971	0.58466	25.1456	25.4193	15.5497	4.94718	5.69518	23.177	22.6507	0.37118	6.269
TCGA-BP-4963-01A-01R-1334-07	0.0835794	2	787.958	1999.27	2787.23	0.528367	1	0	2.10249	14.7819	32.8452	0.210478	7.63095	0.169168	5.06516	28.1409	1335.39	1.12233	2.90086	1.46488	0.83147	20.763	11.6013	15.0334	9.72144	8.44682	3.83459	11.3782	55.5023	14.6234	1.78582	60.2665	13.3072	10.6585	0.91882	1.55326	40.0139	4.85527	0.415254	1.41586	58.7111	13.7123	20.7447	12.0889	15.8934	14.7804	31.9983	1.63761	14.5738
TCGA-BP-4965-01A-01R-1334-07	-0.0784553	2	861.057	1216.18	2077.24	0.613823	0	0	3.33069	8.35138	29.9947	0.21122	2.6026	0.0955984	2.40021	14.3414	783.947	0.30048	0.54141	1.04844	0.164784	3.23672	15.6538	9.4629	7.59119	3.5327	3.75924	5.75239	31.9859	8.316	0.463834	22.9773	14.3906	8.0947	0.351397	0.269993	26.7391	2.71974	0.268674	0.418454	38.6156	23.0582	21.8974	6.99283	8.05569	18.1921	18.0555	0.481173	18.1963
TCGA-BP-4967-01A-01R-1334-07	0.0523863	2	342.834	981.981	1324.82	0.697098	0	0	1.60997	6.14153	36.3331	0.164569	2.06443	0.586246	2.09925	10.4558	736.791	0.164747	0.0593687	0.59496	0.197303	33.6606	10.1226	7.28342	6.38908	3.42833	2.13967	4.1068	22.7123	6.80253	0.56709	108.608	15.079	4.68759	0.30879	0.434843	17.5259	3.45742	0.251094	0.676663	27.3227	20.0988	12.0893	7.93293	6.26605	94.8721	10.486	0.599585	6.38245
TCGA-BP-4970-01A-01R-1334-07	-0.0340221	2	1510.46	2172.71	3683.18	0.412468	0	1	6.64508	18.5354	71.6087	0.310002	8.6837	0.34519	6.374	21.2907	1996.22	0.565569	0.827783	2.36954	0.682069	23.4708	13.9083	5.52527	13.3956	7.86041	6.96511	14.2899	60.5877	18.584	0.448991	16.1364	14.7272	12.0979	0.687472	0.31273	52.6642	5.93053	0.152772	0.925498	61.1217	25.9743	34.9816	12.4086	19.2649	92.6665	32.8259	2.22935	14.0995
TCGA-BP-4972-01A-01R-1334-07	-0.100668	2	1609.67	1901.7	3511.37	0.435308	0	0	5.28461	12.4634	27.2213	0.275522	4.49839	0.155031	3.35569	26.7185	1303.46	0.532524	3.70223	1.78652	0.176015	7.13663	16.8429	7.35972	11.5605	9.43417	5.2369	8.36728	97.448	16.3641	0.833319	31.5063	14.278	8.33518	0.441773	0.279735	53.3836	5.48074	0.327649	0.810367	69.2363	10.9752	11.5592	11.0336	9.35432	27.3959	55.3081	0.424589	12.4052
TCGA-BP-4974-01A-01R-1334-07	0.451139	2	893.295	1057.38	1950.67	0.628383	0	0	2.99926	5.68015	7.61792	0.186746	7.43652	0.229737	4.052	6.01866	476.168	0.92268	1.74725	1.02719	0.719604	7.71637	9.12226	3.37002	12.149	3.26021	3.15063	7.48777	12.6947	4.71861	1.46768	6.11289	18.0937	10.5898	0.597336	0.707144	14.08	1.50575	0.158826	0.919275	23.0334	23.3638	17.7001	6.58108	7.62636	31.9362	6.09166	0.932347	7.11302
TCGA-BP-4982-01A-01R-1334-07	0.153704	2	1284.75	1676.53	2961.28	0.506505	0	0	3.76006	13.5382	27.7764	0.247832	6.16013	0.151931	4.01223	20.1363	1075.99	0.975638	5.27738	1.56665	0.397144	8.75122	16.9096	11.8229	10.3557	6.00592	3.57588	9.11471	40.243	14.1085	1.14284	10.6439	14.5799	10.3151	0.580068	0.587446	32.0194	3.93635	0.333576	0.817714	43.6951	26.0517	14.7797	9.81691	12.7145	29.4263	21.1677	1.00739	16.5713
TCGA-BP-4986-01A-01R-1334-07	-0.0221489	2	1311.17	1691.59	3002.76	0.501247	0	0	3.87535	12.6555	71.3343	0.31714	6.52231	1.05224	4.25664	21.0675	1194.98	0.560888	0.358483	1.02624	0.51618	92.0444	10.867	4.95988	8.71389	10.0494	3.76719	11.6385	41.2175	10.0032	0.630105	108.862	16.812	10.0079	0.87887	1.19814	28.6227	7.62341	0.505819	1.91432	43.3526	22.7245	16.4751	9.59498	12.661	199.19	23.1414	0.671707	8.66387
TCGA-BP-4987-01A-01R-1334-07	-0.0295325	2	743.772	1443.61	2187.39	0.60098	0	1	3.24301	10.8681	23.7087	0.160532	3.46833	0.103451	5.02885	12.6306	866.362	1.38756	1.7628	1.86702	0.320914	5.56788	17.3904	14.4301	9.12621	4.53754	3.30408	10.6301	31.7135	11.6249	0.367571	7.71952	11.7014	8.32269	0.512009	0.327543	25.9998	3.05452	0.389984	0.88429	25.6771	27.381	28.4605	7.99162	13.3579	6.89299	19.8714	1.88302	7.19228
TCGA-BP-4991-01A-01R-1334-07	0.352236	2	836.028	1375.33	2211.36	0.598164	0	0	5.5242	9.3989	29.1033	0.277938	4.89754	0.101501	2.79469	15.4927	514.203	0.592066	0.160894	0.941217	0.2198	2.22523	20.643	7.58021	14.8616	4.33453	5.6167	5.78547	32.0688	10.1432	0.226344	31.0635	19.5154	9.9507	0.377839	0.750026	23.8445	2.91611	0.302963	0.683875	33.0556	21.8678	13.3794	7.99607	8.08232	2.0948	17.2963	0.237379	15.5105
TCGA-BP-4993-01A-02R-1420-07	0.24266	2	1064.34	1552.12	2616.46	0.549481	0	1	2.56947	6.64754	27.8539	0.0859013	2.81825	0.0856465	3.69878	8.50017	1297.12	1.89188	1.81803	1.15941	0.18309	29.6544	15.2872	2.58198	7.62307	3.2462	2.42796	10.4451	17.1883	8.86416	0.448013	29.3899	12.8265	7.52344	0.223174	0.57952	25.2518	1.60007	0.41941	0.417532	40.8502	21.1411	19.9577	7.49495	12.1811	14.7026	8.24036	2.26173	11.0524
TCGA-BP-4998-01A-01R-1334-07	0.115182	2	1396.97	2167.22	3564.18	0.428316	0	0	3.93937	19.2287	45.9541	0.327258	6.447	0.528518	6.51091	25.9718	1637.19	0.962362	1.33555	2.29423	0.826319	47.7048	10.9363	7.13831	9.70837	9.72345	4.10229	12.9256	57.7919	19.7619	3.5355	29.7138	13.7399	12.5298	0.997836	1.35228	51.8413	6.14206	0.509307	1.53287	65.7074	25.7144	24.5165	15.6373	18.5201	124.774	30.589	1.74675	12.287
TCGA-BP-4999-01A-01R-1334-07	0.123451	2	990.232	1022.92	2013.16	0.621222	0	0	1.42886	6.26847	18.1294	0.139425	5.06004	0.0509709	1.97599	11.6326	538.868	0.49317	0.248137	0.607793	0.340395	4.09366	13.5751	7.86077	5.92511	3.16345	3.93869	3.73859	19.8315	6.71684	0.18006	1.02433	16.5907	7.48247	0.488342	0.510021	14.8304	1.99233	0.381214	0.579978	23.0992	23.0315	14.2585	7.11789	5.68848	5.80166	14.3079	0.303432	5.36028
TCGA-BP-5186-01A-01R-1426-07	0.115187	2	709.209	1062.46	1771.67	0.648604	0	0	2.98005	4.91382	13.6172	0.156036	1.87211	0.486165	2.9898	6.97297	807.405	0.585768	44.6946	1.36695	0.0982604	38.3595	19.1364	9.15392	10.3279	2.79144	2.11105	9.16202	20.0944	8.85496	0.452108	8.51406	12.91	4.86427	0.352836	0.292409	19.6063	1.73666	0.431708	0.41449	21.6091	14.7114	24.0308	6.48884	9.65848	195.791	4.82677	0.826214	13.206
TCGA-BP-5189-01A-02R-1426-07	0.274073	2	1155.6	1832.65	2988.25	0.503088	0	0	1.30333	16.0667	36.2127	0.340834	9.4617	0.145444	2.91939	19.4334	1926.89	0.442199	2.4552	1.69106	1.89247	9.61961	9.03596	3.26648	6.20151	8.03593	4.91263	7.45081	50.0282	12.7417	0.308794	19.3517	16.5523	8.54978	0.554912	0.367902	38.9941	4.97534	0.383411	1.043	60.5458	23.4361	15.9903	8.00883	10.9104	21.0774	34.7624	1.22549	6.30261
TCGA-BP-5194-01A-02R-1426-07	-0.0368341	2	938.994	1441.45	2380.45	0.578091	0	0	1.84975	8.00554	15.2975	0.25425	5.5024	0.414368	3.20849	11.67	674.439	0.332841	45.1622	1.36248	0.238742	92.1248	18.7567	8.63937	9.49633	4.2389	4.56824	8.56259	40.9721	9.86978	0.199146	13.2071	16.0344	6.99691	0.471417	0.474994	24.0436	2.31293	0.620682	0.97494	35.5023	20.0815	14.4908	7.68866	8.86676	82.1384	11.9762	0.450337	16.3893
TCGA-BP-5195-01A-02R-1426-07	0.35004	2	1270.51	1564.57	2835.07	0.522392	0	0	1.30354	7.02459	16.2238	0.203917	3.53727	0.147689	2.86273	15.919	1186.63	0.335095	0.549647	1.11471	0.342186	9.803	13.0062	4.83135	7.11641	5.41933	3.9097	10.4203	29.0136	14.5263	0.206397	15.4312	16.2903	6.59764	0.399837	0.269948	25.289	2.53806	0.315592	0.446218	46.8041	22.206	13.5898	7.32831	11.4967	34.2982	17.3294	0.5652	8.98249
TCGA-BP-5198-01A-01R-1426-07	0.4313	2	1354.74	1925.26	3280	0.465627	0	0	0.818805	11.1719	10.0838	0.309382	22.5996	1.61944	3.25426	14.2884	1179.53	0.586833	27.606	1.15484	0.951263	71.2657	4.33258	2.11018	6.62477	8.17662	5.29643	11.8588	47.8903	12.0936	0.497415	49.4817	21.6596	6.8414	0.810836	0.703058	48.2897	3.63928	0.799	2.38544	86.8644	20.4099	14.1092	9.71193	8.67891	551.99	58.0013	1.77266	6.51034
TCGA-CJ-4634-01A-02R-1325-07	0.0595963	2	1007.13	1015.42	2022.55	0.620141	0	0	2.09101	6.67897	14.7727	0.147148	2.79734	0.0638904	1.80794	13.4061	787.083	0.356388	1.23292	0.587339	0.132442	4.71102	25.5867	11.4703	11.6593	6.09231	2.74981	5.23635	27.5846	9.73132	0.770976	0.607097	15.0154	5.62503	0.35763	0.409893	25.3779	2.59621	0.20858	0.473241	30.1821	23.5208	13.7498	8.22299	9.50021	12.4967	26.9794	0.315442	12.9867
TCGA-CJ-4636-01A-02R-1325-07	-0.147531	2	1300.48	2401.35	3701.83	0.409972	1	0	3.54913	16.3753	34.2705	0.537277	3.15528	0.182486	5.36702	30.5308	2187.82	0.65607	4.69013	2.69059	0.504506	20.4085	11.8057	6.95434	8.43899	11.0774	4.80608	24.1417	74.8737	28.1062	1.74199	71.6807	14.4349	10.6999	0.731167	1.11528	56.0907	4.36044	0.242145	0.732793	112.467	18.3725	35.7541	17.0144	18.5654	36.0014	37.7299	3.61385	20.4201
TCGA-CJ-4639-01A-02R-1325-07	-0.250105	2	614.338	1888.92	2503.26	0.563288	1	1	3.37273	18.6158	28.0302	0.245401	5.11659	0.151122	9.66977	9.78236	1510.67	1.7558	2.45278	4.45456	0.717441	14.1142	21.819	10.434	9.71495	3.55078	4.7688	26.1275	33.8154	15.1835	1.54876	37.9355	9.6441	9.05421	0.73757	0.642748	27.5433	3.29355	0.444025	1.40982	29.7009	25.0787	33.928	10.8379	20.5976	27.4924	7.88624	4.5062	10.7609
TCGA-CJ-4643-01A-02R-1325-07	0.207348	2	1186.18	1767.48	2953.65	0.507471	1	0	2.39968	13.6998	35.5495	0.313334	6.62669	0.175728	4.65945	16.5806	1158.01	0.548929	2.17595	2.16707	1.03211	10.9733	14.6345	9.06812	8.52118	6.28922	4.78237	9.14161	41.5768	13.8448	0.486362	5.16691	13.1219	8.21544	0.802746	1.0217	31.5744	3.35756	0.216728	1.48758	44.3612	26.1547	19.0112	10.115	14.4638	39.4908	9.9168	1.23292	9.43801
TCGA-CJ-4868-01A-01R-1305-07	0.336827	2	1558.88	2417.71	3976.59	0.372862	0	1	3.21815	13.3213	20.682	0.42135	10.731	0.436904	6.34476	23.3664	1456.18	1.16419	3.39272	2.61953	1.08747	64.8967	10.5132	2.28986	9.18541	8.59509	6.83687	19.5575	52.504	15.9582	0.971097	61.7127	29.0784	11.1017	0.948723	1.81925	46.0529	4.69374	0.559565	0.960186	95.0367	16.6602	29.0452	13.824	20.6461	157.526	31.503	3.88082	12.6499
TCGA-CJ-4886-01A-01R-1305-07	0.0304066	2	1122.76	1863.87	2986.64	0.503293	0	1	2.61035	11.6084	23.4473	0.416695	8.97167	0.310427	6.56807	15.8147	1659.87	0.7593	0.435771	3.21457	0.351084	12.2559	14.2211	6.30373	6.88719	5.1814	6.59974	18.0412	44.9966	14.4689	0.376743	11.129	14.0517	8.99392	1.19206	0.985489	36.1996	2.92471	0.466334	1.60041	51.2813	27.1454	28.6853	9.48605	15.4259	14.4244	14.6442	2.80845	11.7494
TCGA-CJ-4889-01A-01R-1305-07	0.119736	2	1714.87	2382.09	4096.97	0.356409	0	0	5.72387	25.5196	29.8195	1.44941	18.092	11.5434	9.33223	17.8164	1576.09	2.29519	17.9871	3.38674	0.528494	324.306	14.5165	6.84339	16.4523	6.86248	27.7145	20.9283	69.3447	34.9207	0.71339	13.9484	14.1312	10.0332	3.07335	1.11413	68.7062	6.54173	0.501802	2.95801	62.1214	23.833	34.5635	13.3812	31.4488	1402.71	24.7994	2.28896	12.8832
TCGA-CJ-4895-01A-01R-1305-07	0.191302	2	1442.16	1948.62	3390.79	0.451174	0	0	5.60869	11.0218	15.8315	0.204682	3.66082	0.278737	3.90795	21.8793	1630.76	0.584726	3.20933	1.82304	0.679055	21.5453	16.1158	3.07677	10.9405	10.2126	3.8606	11.8499	43.0896	14.6974	1.18281	3.83102	20.8308	9.33009	0.657148	0.511928	44.7744	2.96247	0.46799	1.20875	90.731	16.6158	23.2627	9.63591	15.7851	53.9309	29.4419	1.2572	19.7472
TCGA-CJ-4899-01A-01R-1334-07	0.261667	2	1294.48	1443.26	2737.74	0.534521	0	0	4.6044	8.90416	20.4773	0.269319	8.00506	0.909229	3.31789	20.2534	803.833	0.470965	1.18803	1.44039	0.303196	50.731	14.7345	4.21816	11.9344	6.86154	4.34761	7.34137	49.445	11.7762	0.761998	6.30995	13.3471	8.02243	0.540274	0.781965	36.4046	3.32148	0.539291	0.984969	42.8439	18.1196	12.2424	8.85868	8.14786	149.686	39.0397	0.584265	12.4353
TCGA-CJ-4902-01A-01R-1426-07	0.383615	2	1362.55	2106.05	3468.6	0.440951	0	1	2.26238	11.3508	14.5094	0.558513	9.43544	0.666932	6.63696	22.0651	1203.94	1.23851	0.864512	2.44995	0.928671	116.76	13.6989	3.07341	7.16562	6.51777	8.44079	14.5573	45.1655	11.7614	1.2387	34.4941	23.1886	10.9425	1.02922	1.54222	35.1082	3.648	0.694412	1.44692	64.2206	33.0357	17.2295	11.6106	15.0707	139.38	22.8097	1.64682	12.0557
TCGA-CJ-4905-01A-02R-1426-07	0.317032	2	1278.24	1240.06	2518.3	0.561462	0	0	1.9654	6.58403	13.2262	0.107226	4.02739	0.053454	3.14219	8.057	655.098	0.289824	0.657597	1.0625	0.0436306	3.14272	13.2654	3.67493	9.78186	3.1598	3.42348	6.09143	22.2491	7.42322	0.0745642	3.02745	27.751	6.61969	0.325007	0.270064	18.9441	1.61969	0.240823	0.763596	24.728	25.7165	11.9062	5.62941	8.18439	4.40461	8.47204	0.243775	6.03664
TCGA-CJ-4907-01A-01R-1426-07	0.127971	2	1193.01	1262.8	2455.81	0.569029	0	0	1.56588	5.70473	16.5239	0.161739	1.35224	0.0952893	2.21001	11.9682	1097.25	0.220792	1.97321	0.57687	0.173077	12.1874	11.5688	3.77789	5.57523	3.67399	2.57831	4.59736	22.821	9.05763	0.460111	59.2643	21.9785	6.41403	0.232384	0.545573	21.3581	1.9209	0.398431	0.501107	32.0994	19.7527	14.0365	6.4065	8.80779	12.7955	8.10053	0.443562	7.77693
TCGA-CJ-4908-01A-01R-1426-07	0.420685	2	1183.98	1482.96	2666.94	0.543275	0	0	2.7785	7.81886	10.8599	0.141305	3.63196	0.302162	4.0596	14.0822	817.054	0.547218	1.4005	1.27936	0.285325	79.9013	14.1617	3.87105	7.94923	4.51208	2.68895	8.11419	29.2605	8.19407	0.936445	20.6212	23.397	9.72229	0.334911	0.852945	22.1215	2.54792	0.359482	0.348037	28.2365	31.4336	19.9992	7.66782	11.467	47.7293	13.7711	1.39816	9.49011
TCGA-CJ-4918-01A-01R-1426-07	0.160424	2	1657.89	1913.19	3571.08	0.427401	0	0	1.93401	9.92904	25.0206	0.289847	3.89016	1.14757	4.72548	19.7322	1003.16	0.794788	13.184	1.75583	0.373597	23.9398	8.37934	2.29247	8.46794	6.7615	4.87838	10.7664	36.7127	12.6593	0.557098	5.28138	22.1964	11.6496	0.713015	0.476099	40.5868	3.08188	0.418397	0.880341	51.0682	15.8126	12.4917	8.63681	13.2248	387.81	29.6465	1.27089	5.60043
TCGA-CJ-4920-01A-01R-1426-07	0.332048	2	998.375	1359.53	2357.91	0.580788	0	0	2.02831	5.97055	14.352	0.107254	3.34894	0.174986	3.3467	12.8198	844.369	0.322111	0.0844197	0.846006	0.45059	10.6146	11.6276	3.63641	7.38332	5.37291	2.18929	7.16006	23.5569	7.0981	0.973463	24.4472	16.1861	6.8845	0.565744	2.34175	21.5677	2.22603	0.685525	1.7359	36.9259	23.1803	13.5001	8.93509	9.88689	67.647	13.965	0.417766	8.83146
TCGA-CJ-5671-01A-11R-1541-07	0.299092	2	1787.29	2558.79	4346.08	0.322012	0	1	1.15853	17.0413	17.4495	0.550422	14.7548	1.0108	10.4959	23.8616	1869.73	1.3281	3.92042	2.32845	0.377382	263.308	4.94664	3.13683	8.60029	13.2894	9.5355	20.3136	72.6507	16.4103	0.399584	54.3229	27.2372	12.2184	1.88632	1.19335	66.9273	6.27422	0.578828	3.87668	98.4908	32.8233	15.5128	16.7297	24.9335	439.817	55.1363	2.07327	10.941
TCGA-CJ-5672-01A-11R-1541-07	0.0211137	2	814.448	2545.96	3360.41	0.455149	1	0	3.4599	20.6605	81.028	0.730746	3.83796	0.506693	10.8272	20.8064	4173.17	4.32937	1.68237	3.85938	1.50602	68.8681	13.0705	6.29335	9.86138	9.18668	8.43592	32.166	79.2904	24.1567	0.801828	38.2022	11.5619	13.08	0.770906	1.59548	64.0559	7.2936	0.700594	1.02726	89.0416	26.2216	55.1714	13.1908	32.8488	179.839	21.7966	10.421	22.3554
TCGA-CJ-6028-01A-11R-1672-07	-0.0840026	2	1026.66	2510.85	3537.51	0.431851	0	1	4.27791	35.052	39.3545	0.945313	7.4016	5.37621	10.7392	22.3863	1357.98	0.806346	0.520618	8.38994	2.79953	1995.19	11.2744	9.10526	11.7495	8.74731	12.1724	36.7402	110.039	30.3804	0.516777	59.2306	8.1158	13.5741	2.59643	0.664157	66.4525	7.19047	0.26218	1.66164	67.6801	24.6811	20.5986	18.4246	20.5436	446.398	46.1294	4.3237	15.5921
TCGA-CJ-6031-01A-11R-1672-07	0.261691	2	1604.74	2380.69	3985.43	0.371657	0	1	1.78957	12.5492	23.7105	0.472839	5.9739	0.652758	6.66726	23.2125	1716.3	1.08021	8.70387	2.42104	0.387618	136.254	11.2195	3.50534	5.52475	10.1241	10.73	21.1344	69.5488	16.9455	0.25293	38.3275	19.7181	9.58248	0.895965	0.861556	54.951	3.76595	0.520919	1.71858	106.787	28.7289	21.7937	12.5487	19.6953	320.421	48.7475	1.95773	9.2569
TCGA-CW-5581-01A-02R-1541-07	0.108187	2	249.862	1045.55	1295.41	0.700186	0	0	1.81994	7.92083	17.5339	0.268474	8.79239	0.105449	4.29675	5.92092	727.149	0.452014	0.396217	1.26447	0.262467	4.53556	16.2872	7.06871	5.43694	2.03658	2.74834	10.0765	18.0229	6.25642	0.0606152	39.1868	9.04977	4.50495	0.76796	0.296382	16.716	1.8527	0.333662	1.73809	16.9107	18.7224	23.2139	6.22393	8.43163	5.37094	5.73036	0.690041	17.6439
TCGA-CW-5583-01A-02R-1541-07	0.0531176	2	719.377	786.391	1505.77	0.67781	0	0	2.78985	5.58103	21.089	0.115195	1.3704	0.132082	1.98973	5.91762	629.685	0.184512	0.224409	0.851755	0.167405	13.1539	18.1627	8.38059	8.34963	2.38152	4.11552	4.70943	17.3353	5.4605	0.143046	12.3519	12.2184	3.70184	0.159617	0.36267	12.5852	1.71474	0.258721	0.242198	16.4343	13.2634	15.402	4.33301	5.71509	17.3608	13.1287	0.355905	9.32621
TCGA-CW-5584-01A-01R-1541-07	0.252865	2	871.747	1346.47	2218.22	0.597356	0	0	1.92313	9.68254	26.6974	0.0905767	2.59975	0.0967586	1.8816	12.4791	1066.35	0.388606	1.7645	0.709426	0.616772	6.00643	18.3759	6.50266	9.42718	4.87798	3.92062	4.62514	36.1383	14.7299	0.218524	44.1216	18.4462	5.54053	0.250262	0.279343	23.5891	3.21514	0.328519	0.368588	36.5563	27.1085	13.6827	6.70926	13.0519	21.8823	17.0897	0.33189	14.9208
TCGA-CW-5585-01A-01R-1541-07	0.112376	2	241.959	461.108	703.066	0.759541	0	0	1.4018	3.37125	66.3726	0.0670579	0.984106	0.0167147	1.23746	3.71734	769.118	0.190203	0.0967654	0.376648	0.0324834	3.32191	47.8605	6.13919	5.97924	1.40955	1.56178	2.1328	13.1703	3.69583	0.138784	16.5149	19.2777	2.76448	0.0709779	0.180958	9.34309	0.938142	0.403803	0.219821	14.473	13.7675	11.603	3.8801	5.00192	1.66945	3.24836	0.162878	15.7079
TCGA-CW-5587-01A-01R-1541-07	-0.324121	2	1109.03	2501.48	3610.51	0.422162	0	1	9.25683	27.4512	59.3158	0.554276	3.33135	0.17193	11.6104	29.1102	3605.81	1.13441	0.159965	5.94767	1.0167	15.5928	20.4667	11.6933	18.2861	8.87491	10.2548	31.5693	124.311	38.006	0.703578	11.3347	9.67651	13.3036	0.849793	0.875282	67.9039	7.77199	0.204471	0.442754	82.1458	18.9151	43.7827	14.1207	26.955	49.5123	39.4919	6.36166	21.3278
TCGA-CW-5588-01A-01R-1541-07	0.00835237	2	1372.73	1788.55	3161.28	0.480978	0	0	1.69183	11.0605	30.0477	0.238378	2.30356	0.144979	3.19363	22.7025	1309.73	0.286364	0.154792	0.913658	0.141338	137.072	11.7568	6.77378	8.30123	8.9144	4.46302	9.17502	41.1127	13.9934	0.291275	29.89	19.2477	5.64003	0.383975	0.334502	47.6402	5.85654	0.544693	0.950643	51.3047	27.4185	13.5406	9.05934	13.8227	34.2213	27.1223	0.41688	11.2695
TCGA-CW-5589-01A-01R-1541-07	-0.0263887	2	916.582	1553.7	2470.29	0.56728	0	0	3.2949	8.51339	25.4191	0.17951	5.75364	0.298296	3.07818	15.5944	1448.36	0.539113	6.54562	1.00016	0.184614	38.3945	19.466	6.00031	7.84113	5.292	2.86629	7.58096	58.0328	11.1035	0.301786	27.3466	12.2942	6.08408	0.486303	0.8322	29.28	3.40464	0.498903	0.973984	46.9369	12.6463	13.1281	8.70489	10.5956	111.345	23.164	0.386375	12.2732
TCGA-CW-5590-01A-01R-1541-07	0.265027	2	996.901	1599.13	2596.03	0.551984	0	0	2.21512	9.6177	16.827	0.321356	8.96729	0.0686576	4.88431	11.5979	1426.88	0.564026	0.0632346	1.76334	0.691405	2.09045	11.1078	5.87789	6.81048	4.24777	3.09717	12.5345	31.5299	9.44222	0.174131	53.1261	15.9499	8.66883	0.84212	0.855929	25.8143	2.61184	0.452363	1.30771	37.4367	25.4793	24.5251	7.91163	11.8182	3.50664	20.8625	1.45972	11.3622
TCGA-CW-5591-01A-01R-1541-07	-0.0148432	2	554.162	197.68	751.842	0.754864	1	0	1.23113	5.14423	26.8705	0.0864944	1.43351	0.0766558	0.718261	5.60774	502.039	0.0577254	0.665667	0.319045	0.0335188	2.86147	10.0667	5.92509	5.36545	1.90614	2.64682	1.77756	27.7441	5.76162	0.200492	0.231919	14.1908	2.2243	0.0832279	0.116704	9.94156	1.44297	0.239306	0.351976	22.0404	5.40612	5.77131	2.98844	4.60992	15.2656	16.3867	0.176473	5.76366
TCGA-CW-6088-01A-11R-1672-07	0.184343	2	803.885	866.432	1670.32	0.659855	0	0	3.15935	8.31882	25.587	0.0949655	1.32137	0.0801171	1.85221	9.01002	550.894	0.307144	0.545511	0.622808	0.52867	10.1332	22.9818	10.026	11.6524	2.9329	3.553	3.24113	25.8985	8.28971	0.228594	2.43272	11.9294	4.85778	0.234071	0.137991	17.0026	2.19993	0.1391	0.468196	22.5523	14.679	16.9979	6.19611	6.3816	7.30702	10.1583	0.217178	17.4285
TCGA-CW-6097-01A-11R-1672-07	0.132833	2	1414.99	2542.61	3957.6	0.375447	0	1	4.5309	32.0511	59.776	1.68551	39.2702	3.70112	10.5919	24.2749	1586.44	1.53668	126.616	4.68561	1.32969	148.209	10.7864	15.0485	16.6531	8.41457	25.2833	23.1737	87.4863	27.0845	0.411128	75.1993	20.3861	11.664	2.17213	1.46199	59.4886	8.90736	0.293908	3.46008	78.6649	9.00493	27.426	19.5379	27.2378	427.753	36.4723	3.07047	13.8108
TCGA-CZ-4856-01A-02R-1426-07	-0.0458489	2	839.832	1770.61	2610.44	0.550219	0	0	3.3058	8.85758	17.5182	0.121286	1.57028	0.455151	6.96441	14.3352	1572.7	0.779092	1.66266	2.71476	0.240882	53.2906	18.9733	8.01011	11.4847	3.68522	1.84202	13.9835	40.4799	13.2789	0.190771	24.0896	11.5586	6.36007	0.440562	1.85467	27.4138	2.54035	0.740216	0.431859	42.3146	28.1835	32.3629	8.66372	15.6542	262.075	9.82201	1.0134	29.8455
TCGA-CZ-5451-01A-01R-1503-07	0.0662383	2	358.241	1461.64	1819.88	0.643201	1	0	2.82996	8.44386	19.3722	0.147575	4.83497	0.0844676	3.65527	12.0627	1666.53	0.574524	1.73911	1.71552	0.295477	9.70505	19.3877	7.12055	7.14868	3.13455	2.53605	7.12475	31.0988	8.23097	0.309496	36.9448	8.3314	5.1075	0.430738	0.589981	18.6622	2.16491	0.64047	0.745106	33.3077	28.1632	28.7053	6.91308	9.98934	18.7198	12.6184	1.94995	12.9484
TCGA-CZ-5456-01A-01R-1503-07	-0.134256	2	755.226	1941.31	2696.53	0.539623	0	0	1.50779	15.8955	14.8821	0.332178	9.16402	1.86457	5.71752	21.6085	1041.17	0.492329	1.72748	2.21331	0.255784	92.7764	3.01137	8.22906	9.3652	7.46165	6.86533	13.7071	53.0447	16.0797	0.527129	96.3387	18.2195	6.50152	1.34121	0.838189	48.4294	4.95417	1.65555	3.03704	69.1063	31.6579	14.5938	15.7226	15.3464	678.241	36.883	0.988317	15.2428
TCGA-CZ-5458-01A-01R-1503-07	0.265406	2	692.421	1747.92	2440.34	0.570895	0	0	2.83947	11.3961	32.612	0.254986	18.8767	0.236895	4.27337	13.8539	922.244	0.545332	1.94009	1.66733	1.33398	18.2313	15.0974	5.0992	6.15569	4.21183	5.06328	10.9739	36.8292	12.9182	0.126653	31.0554	12.9609	5.4222	0.802983	0.573408	24.6314	4.01344	0.939377	2.32679	32.9222	27.1474	18.5419	9.30396	15.931	17.6838	8.74969	1.81748	9.24775
TCGA-CZ-5461-01A-01R-1503-07	0.127052	2	1084.21	1746.66	2830.88	0.522917	0	0	4.81172	16.0719	49.0712	0.372832	6.87231	0.136078	5.24854	19.7449	940.024	0.699818	2.86774	1.57728	0.905594	8.02213	15.7216	6.13631	16.0103	5.85377	3.87495	12.8859	46.7385	11.1308	0.223219	105.507	15.0382	7.10478	0.931154	0.99712	34.2993	3.99947	0.253547	1.94389	49.6357	31.6655	21.8013	10.3563	16.5362	37.4798	20.9976	1.03624	23.4021
TCGA-CZ-5464-01A-01R-1503-07	-0.228258	2	1120.29	2306.96	3427.25	0.446391	0	1	3.67034	17.3552	36.3717	0.597614	3.22123	0.574042	7.90396	20.4881	2529.42	2.0246	2.3978	3.86559	1.39167	67.2518	11.4947	6.6502	12.2669	7.1507	6.37749	22.2177	57.5803	18.6538	1.29234	83.3987	13.5934	9.51248	0.965655	2.90087	46.3742	5.84232	1.1102	1.26044	105.413	31.9869	36.2406	14.2964	27.2866	195.254	15.4858	3.34565	28.7383
TCGA-CZ-5467-01A-01R-1503-07	0.251925	2	653.23	1025.65	1678.88	0.65891	0	0	1.7003	4.87064	12.0127	0.103591	3.19875	0.270126	2.16602	9.5333	689.512	0.107692	0.431201	0.571156	0.159805	29.2866	11.5016	1.39903	4.31308	4.18479	3.24867	3.62324	19.8337	5.54501	0.26123	22.1332	17.4435	5.02042	0.224277	0.344054	18.4689	1.61125	0.12839	0.332373	20.4292	25.6009	18.3547	5.26619	5.68509	68.0377	17.7021	0.578323	4.72533
TCGA-CZ-5988-01A-11R-1672-07	0.119901	2	901.41	1304.56	2205.97	0.598797	0	0	3.35484	9.17898	17.1122	0.299241	6.28992	0.169519	3.65211	8.54022	596.99	0.510623	2.97359	1.94987	0.237199	11.3481	8.5409	4.59579	8.84929	2.6168	3.09098	10.3028	21.7177	7.85114	0.293893	54.1922	24.6032	5.9248	0.730321	0.183526	37.2553	2.34461	0.0597696	0.899449	27.334	18.6061	13.48	10.5077	5.36826	17.9049	10.9993	0.404382	16.1013
TCGA-DV-5567-01A-01R-1541-07	0.305624	2	-44.8713	30.8225	-14.0487	0.823681	0	0	5.28077	1.33481	9.07273	0.0199102	0.617044	0.0138958	0.418853	2.30065	205.811	0.0597953	0.043096	0.174256	0.131939	1.75375	16.062	0.199263	11.4458	0.988614	0.853582	0.631301	11.7863	1.4139	0.106807	0.105703	20.5019	2.6785	0.0896607	0.118203	8.42953	0.454554	0.081657	0.0729193	12.889	14.5468	4.69155	4.24879	1.74991	7.10588	3.57846	0.0626747	5.13932
TCGA-DV-5574-01A-01R-1541-07	0.253702	2	1614.62	2337.82	3952.44	0.376149	0	1	11.4685	14.4297	28.4562	0.270228	4.61092	1.56475	5.12785	30.5351	2237.24	0.599308	85.8114	3.34998	0.268246	326.839	29.1036	2.82893	23.6516	10.1957	8.87779	17.228	82.7378	24.0783	0.854907	10.3836	17.9517	12.2805	0.788469	1.44722	56.1144	4.2556	0.353188	0.930474	99.1859	26.4211	23.9552	12.6721	15.8904	947.734	50.1731	1.2796	18.2623
TCGA-DV-5575-01A-01R-1541-07	0.043232	2	946.147	1644.97	2591.11	0.552586	0	0	3.52438	8.61926	27.0094	0.275796	6.65672	0.332473	4.11966	14.0823	1629.21	0.527089	0.987706	1.89168	0.979392	25.5993	15.2873	4.37726	10.5286	4.30674	4.51727	13.2497	30.2719	11.9892	0.500636	45.4266	10.7879	7.94104	0.560193	0.500674	32.4067	2.44064	0.235036	1.21413	42.3847	28.6991	27.2888	8.46143	9.91434	70.1814	19.3772	1.34172	10.579
TCGA-DV-5576-01A-01R-1541-07	0.114576	2	-59.0155	-206.224	-265.24	0.844024	0	0	4.20974	0.939682	8.66977	0.0301495	0.433553	0.0365015	0.453042	1.72403	333.013	0.0776112	0.344941	0.0909899	0.0525767	3.14591	11.0596	0.495529	7.92784	0.682621	0.905725	0.341415	5.16714	1.09895	0.0641807	0.103938	19.3653	2.01129	0.0522195	0.255701	8.10707	0.231004	0.0883222	0.0262904	6.57411	19.9371	5.95048	3.29824	1.32721	7.82375	1.65176	0.0225968	4.91184
TCGA-EU-5906-01A-11R-1672-07	0.104186	2	984.292	1456.21	2440.5	0.570876	0	0	2.2154	12.4278	31.5797	0.16929	7.21608	0.0468855	2.40202	14.7063	1186.77	0.225965	1.4318	1.18266	0.180412	3.48578	10.6454	10.378	8.70206	4.78338	5.01033	6.4819	52.5228	10.779	0.387738	14.8583	11.954	7.10382	0.439821	0.186118	28.418	3.65596	0.459196	0.73993	38.7739	20.9374	16.3099	7.4981	8.40407	9.40755	22.6339	0.433121	9.62211
TCGA-A3-3313-01A-02R-1325-07	-0.251377	3	-104.818	164.93	60.112	0.817459	1	0	0.709383	4.19043	28.3407	0.0510579	0.991566	0.150598	0.631276	6.89668	344.258	0.0638915	0.25787	0.154091	0.103878	7.75947	5.71507	1.57228	4.20943	3.22164	1.85875	1.41468	20.1835	5.48883	0.557939	0.965161	11.3903	2.84245	0.154758	0.0688909	12.6143	1.36067	0.0747864	0.207772	18.6672	3.3116	4.13222	4.82678	3.36819	26.6594	6.95446	0.178582	4.11456
TCGA-A3-3319-01A-02R-1325-07	-0.361337	3	37.6015	1594.12	1631.72	0.664101	0	0	1.57619	8.87124	16.2455	0.215595	1.23056	0.497312	2.47207	13.7567	1148	0.559691	7.33209	0.634114	0.407831	387.035	5.93324	7.30482	14.5573	6.81914	2.33998	7.04033	35.189	12.238	2.45576	60.0515	10.0333	5.99754	0.420883	0.207078	32.3836	2.75952	0.160571	0.92194	49.385	24.3351	12.4364	16.1598	10.2256	23.5976	17.3951	0.875491	28.2422
TCGA-A3-3346-01A-01R-1766-07	-0.187413	3	57.1406	2053.01	2110.16	0.610002	0	0	14.7231	7.51122	9.38716	0.15706	2.7349	0.0782973	3.32398	13.4445	2022.07	0.485169	0.252542	0.846432	0.798202	9.23449	20.3735	1.19186	16.5036	7.80685	7.87191	9.33747	38.4695	8.99163	1.8322	4.90555	26.337	6.36899	0.373073	2.49457	44.4104	2.10175	0.420667	0.58435	94.498	35.5699	45.6065	11.6944	14.5568	7.25367	36.428	2.30723	49.5757
TCGA-A3-3383-01A-02R-1325-07	-0.200872	3	435.666	2136.14	2571.81	0.554946	0	0	3.65128	4.18983	28.4782	0.203027	4.03483	0.110414	7.27519	23.2322	1961.22	0.776034	1.75782	1.93102	1.01924	14.4829	26.0241	2.99182	7.59735	5.563	2.7962	19.8326	32.208	8.39772	1.86105	38.6609	14.9842	4.99867	0.95371	3.5861	39.0167	2.14394	1.36976	1.21425	80.953	53.7892	61.6608	10.4183	24.8838	35.2993	16.6412	2.00123	24.6303
TCGA-AK-3426-01A-02R-1325-07	0.119799	3	1176.61	3315.86	4492.47	0.301596	0	1	2.29965	10.2105	24.3785	0.905138	13.7908	0.393867	12.3999	37.7949	4974.17	1.58955	4.84817	8.12556	2.8626	114.552	5.19464	2.79516	6.64023	19.4971	10.4796	71.4619	110.61	37.4873	2.89185	77.8191	10.9453	20.0396	1.75372	7.53465	75.2726	4.25047	2.11228	1.9353	295.175	26.2936	56.8831	22.427	67.3768	124.728	11.8205	26.9097	15.0362
TCGA-AK-3427-01A-01R-0864-07	-0.306957	3	-1046.7	-72.2503	-1118.95	0.904437	0	0	0.274925	0.841226	10.7989	0.0140056	0.0968358	0.00930936	0.27913	2.29492	73.2447	0.056083	0.0202103	0.0704472	0.0162826	0.231672	5.87042	0.191684	0.259385	0.235231	0.41803	0.256992	6.307	1.40775	0.271311	0.0450641	5.19157	0.58612	0.068731	0.125982	2.04127	0.0843562	0.0410291	0.0189979	5.78303	19.5749	20.0463	1.38524	1.06654	0.933959	0.359265	0.040822	0.638468
TCGA-AK-3436-01A-02R-1325-07	-0.198664	3	264.738	1006.33	1271.07	0.702733	0	0	0.399133	2.64306	3.10194	0.209729	4.04973	0.19695	1.57691	5.72311	1535.06	0.512685	3.6845	0.809594	0.110573	14.3862	14.893	3.90301	3.17759	1.76051	1.95869	10.2134	19.0426	7.68443	0.0508759	145.502	9.32828	3.28327	0.36748	1.97429	16.6188	0.521791	0.785858	0.615286	21.8477	20.3081	14.8622	6.03011	4.26827	84.1877	3.41529	0.784736	12.6117
TCGA-AK-3447-01A-01R-1766-07	-0.34378	3	-930.93	300.867	-630.063	0.871521	1	0	0.588112	0.399244	2.4447	0.234804	0.046555	0.0409689	0.175486	1.93371	233.962	0	0.0635298	0.0885787	0	0.309505	1.29844	0.0778292	0.370858	0.250064	0.541549	0.529942	10.1426	0.670325	0.297405	0.0849939	3.03872	0.30857	0	0.158407	3.15093	0.065661	0.0859817	0.0119437	2.92659	4.53445	14.2701	0.994042	0.793044	1.5971	0.343465	0.0205315	3.21557
TCGA-AK-3451-01A-02R-1188-07	-0.397731	3	550.696	1779.02	2329.71	0.584152	0	0	0.939973	3.84801	12.6857	0.182533	2.78022	0.0515644	5.20755	17.3008	860.368	0.23755	0.421437	2.49732	0.0636628	6.58597	12.4393	4.91313	1.27588	2.41358	1.92336	15.8223	44.898	8.88043	0.172265	165.652	7.79707	2.92822	0.516381	0.541831	29.6102	0.659644	0.570376	0.581853	52.0587	6.29339	45.728	5.45259	14.1911	16.4081	4.74031	0.744841	18.7565
TCGA-AK-3453-01A-02R-1277-07	-0.0955518	3	190.737	2583.39	2774.13	0.529999	0	1	2.72315	10.5725	17.8119	0.479489	5.04867	0.34527	10.3427	14.7158	3027.8	1.44002	17.9127	4.60921	3.15885	79.3416	15.5205	6.04592	7.10573	8.43966	6.03539	44.7146	42.2763	19.5506	2.92415	55.6906	8.16238	10.6494	1.87628	3.9776	41.3023	2.69188	0.88441	2.51127	85.3712	38.4521	50.4697	15.0763	49.2375	108.003	2.42265	7.42262	17.983
TCGA-AK-3454-01A-02R-1277-07	0.0443623	3	1023.92	1708.7	2732.62	0.535156	0	0	1.54431	3.70179	5.09068	0.0380993	1.50305	0.386194	4.04969	13.1262	1178.89	0.305125	1.81427	1.41811	0.575815	85.473	7.71492	2.8679	5.83261	6.25355	3.15304	12.2201	26.7181	7.13783	2.44123	149.649	13.9955	5.74898	0.912846	2.39896	23.3852	1.05631	0.744074	1.05944	60.8318	20.1405	9.99544	7.19396	16.1259	271.747	7.39037	1.26595	13.3251
TCGA-AK-3458-01A-01R-1503-07	-0.442383	3	59.8139	1443.06	1502.87	0.678123	1	1	1.09657	7.21675	12.666	0.217795	6.23378	0.15683	3.63729	11.2778	760.454	0.763107	0.392851	3.58774	1.61417	7.09267	20.9311	9.07434	2.48033	2.12551	2.99585	10.6303	25.3234	9.17537	0.342571	121.949	6.19089	2.88996	0.801603	0.767311	20.8286	0.853702	2.942	0.566236	20.6262	34.1026	42.3809	8.45876	8.8253	34.8566	6.67565	1.54469	16.5068
TCGA-AS-3777-01A-01R-0864-07	-0.213347	3	-377.823	371.053	-6.7699	0.823074	1	0	1.00487	1.51392	3.13022	0.0880835	1.01428	0.0585481	0.796476	3.44427	211.096	0.0992013	0.278044	0.221527	0.140806	3.97267	5.2974	0.259001	2.25457	0.862428	1.03071	1.76981	21.7841	1.72226	0.1586	0.0797107	6.41457	1.38982	0.181168	0.307025	5.9558	0.402109	0.139771	0.448053	11.5276	10.3254	11.868	3.14051	2.53766	19.6479	3.54094	0.154042	3.76584
TCGA-B0-4691-01A-01R-1277-07	-0.314807	3	707.46	1999.11	2706.57	0.538383	0	1	1.73854	8.77624	12.4051	0.478324	5.61661	1.52043	7.94938	8.58346	1168.52	0.952943	3.09578	3.0372	1.09841	149.763	7.75417	4.71945	4.44133	3.13032	5.46781	22.4514	21.3515	10.6217	1.13619	114.297	18.1752	7.42011	1.32883	2.42819	27.5086	1.67207	1.85907	1.38758	47.2949	34.5252	49.1858	16.3091	22.9326	773.257	2.10536	2.60061	29.8852
TCGA-B0-4697-01A-01R-1277-07	0.0221623	3	1076.89	3092.63	4169.51	0.34644	0	1	2.81934	18.7129	13.3204	2.16938	8.64415	31.0072	12.497	18.8855	4128.62	1.73131	31.9173	10.8279	6.24345	1751.02	4.71733	2.40717	9.73385	16.6845	13.8721	57.4882	57.7566	53.3513	6.9174	17.0232	9.89739	15.9104	6.12221	10.8486	76.7666	4.499	1.19992	3.98183	150.685	28.4532	65.2136	25.6441	57.1905	16352.1	17.9168	29.2365	14.0128
TCGA-B0-4707-01A-01R-1277-07	-0.0590265	3	37.0254	850.625	887.65	0.74164	0	0	1.40405	3.95264	1.77331	0.250997	2.81312	0.647082	2.78703	1.65274	619.596	1.83068	4.59467	1.28775	1.37565	82.6847	6.91405	2.79111	7.3262	5.08832	3.49284	11.4956	5.62481	3.04535	0.277841	27.7931	15.9687	2.63514	0.589994	1.7417	6.61537	1.02636	0.231091	0.452332	5.63803	16.5978	14.9823	4.25575	7.14112	384.833	0.729743	4.60269	15.7885
TCGA-B0-4712-01A-01R-1503-07	-0.0609131	3	1059.91	2105.55	3165.45	0.480441	0	0	2.11729	7.55814	12.8638	0.450475	2.86826	0.364107	5.90296	14.1419	1192.46	0.499124	0.908795	2.23066	0.922852	97.9498	4.59868	1.75644	8.08939	6.01604	5.99884	18.5091	29.4698	11.877	0.462716	145.584	15.5563	6.76758	0.818107	2.34863	40.8111	2.12618	0.576548	1.04115	97.819	25.1653	52.9229	5.85937	21.4369	29.7131	10.0357	2.29456	21.1403
TCGA-B0-4713-01A-01R-1277-07	-0.39813	3	64.0979	1424.72	1488.81	0.679638	1	1	0.911488	5.94866	6.99769	0.157647	2.27743	0.44639	3.14888	4.58125	1130.94	0.378763	0.218387	1.56053	0.626808	27.0582	11.5832	3.83244	4.79763	2.49564	2.31845	12.7464	20.8867	8.69732	1.21216	14.076	8.86326	4.0067	0.693543	2.042	15.0861	1.02367	1.86577	1.00077	20.435	14.318	22.6754	5.99123	12.2188	167.984	1.82075	1.79754	22.6814
TCGA-B0-4718-01A-01R-1277-07	0.0946236	3	501.188	1573.11	2074.29	0.614165	0	0	1.43692	4.92443	11.2167	0.202337	1.11095	0.216147	3.41648	8.17942	1434.58	1.06342	1.07927	1.65747	1.55002	18.5352	7.25084	1.35062	3.55843	4.20382	2.7451	12.2202	15.1398	7.69754	3.12276	92.7378	8.39748	6.23638	0.413033	1.05303	18.868	1.49849	0.550404	0.632238	41.3761	28.3756	29.1769	7.58047	15.8452	94.3147	3.86512	2.17366	7.04751
TCGA-B0-4811-01A-01R-1503-07	-0.114984	3	337.031	1121.58	1458.62	0.682883	0	0	1.25016	2.0813	5.9145	0.217372	0.973368	0.2384	2.50306	5.22891	928.48	0.300299	0.235253	0.93811	0.477626	7.51713	9.07977	8.56618	4.37509	2.38569	1.9287	8.17506	12.1798	4.86364	1.80095	44.4722	7.48233	3.76519	0.350139	1.40781	8.70852	0.687041	0.229243	0.973019	26.9931	38.3972	23.8053	6.72348	8.1006	82.1716	1.91056	0.562614	9.66235
TCGA-B0-4813-01A-01R-1277-07	-0.0134633	3	344.689	974.29	1318.98	0.697712	0	0	0.935954	2.57818	5.47995	0.119567	0.875325	0.0560999	1.02016	9.62682	1395.04	0.316844	0.091343	0.371461	0.220774	2.81401	7.14739	0.619675	3.08838	3.65018	1.41224	2.53983	13.6346	2.77341	2.43149	0.560102	16.52	4.76326	0.274093	0.759191	13.0637	0.516415	0.803558	0.271901	38.5179	18.5937	12.561	12.6586	5.51435	12.6635	5.46169	0.492002	7.33762
TCGA-B0-4817-01A-01R-1277-07	-0.324137	3	-258.39	1978.67	1720.28	0.654327	0	0	1.03034	5.60166	4.33621	0.105542	0.780226	0.386871	1.95909	3.7613	1084.39	0.223743	0.430019	0.964933	0.747032	13.1417	7.52803	4.64409	2.64267	1.93094	23.3482	6.26096	30.8292	18.477	2.45157	43.2078	10.1301	5.57965	0.489262	1.07222	29.2421	1.33725	0.454681	0.303167	36.2617	20.7997	22.9224	5.53571	19.9884	166.628	2.61387	0.792581	11.3485
TCGA-B0-4821-01A-01R-1503-07	-0.0809048	3	-230.857	1215.56	984.699	0.732009	0	1	1.09047	2.79917	1.60941	0.0759853	1.24071	0.242877	3.15743	2.42261	1218.03	0.416135	1.32545	1.66595	0.779461	11.4785	6.50881	0.846875	3.31252	1.42909	1.46144	9.96001	8.42253	4.3385	3.13041	68.3418	13.7516	3.26887	0.367729	5.95849	11.4083	0.755079	1.87244	0.345588	15.9589	27.1442	26.3306	7.52213	11.2731	75.1832	3.5022	3.12669	9.30947
TCGA-B0-4822-01A-01R-1277-07	0.0525481	3	1002.51	1856.31	2858.82	0.519417	0	0	1.52761	3.12787	5.24139	0.115705	1.50091	0.458409	3.78936	16.0134	1228.71	0.34749	1.39722	1.6265	0.881431	97.0996	5.48078	2.21907	5.23891	7.40878	2.85862	13.181	28.2539	7.42125	3.60255	163.929	12.7518	6.03244	0.769968	2.465	28.6833	1.13354	0.463831	0.87973	73.6131	23.5471	14.5327	7.72966	16.0799	284.101	8.36565	1.53357	14.3629
TCGA-B0-4828-01A-01R-1277-07	-0.261584	3	-427.048	1201.28	774.228	0.752705	0	0	2.48087	6.71014	9.46135	0.198734	2.40135	0.204536	4.13821	5.21406	847.403	0.519836	2.28958	1.78964	1.06206	26.196	16.7338	5.6784	9.51646	1.8412	2.29614	14.1018	11.9176	6.95463	1.05082	68.9052	8.41626	3.7429	0.782805	1.43588	17.1716	1.29076	0.319264	1.94353	21.3158	33.633	24.8656	8.86733	14.0715	32.3704	1.93666	1.05386	23.6096
TCGA-B0-4836-01A-01R-1305-07	0.136198	3	868.025	1978.34	2846.37	0.520977	0	1	2.43521	13.7324	11.9924	0.808496	10.9965	1.25332	7.35766	10.4962	1603.89	1.36374	5.38187	3.90234	1.33266	355.593	7.02542	2.90843	12.632	3.79471	7.31006	26.4109	32.5248	12.331	0.420841	85.9131	15.4192	6.39277	1.66409	2.28636	28.1991	2.54439	1.10312	1.94924	43.0054	29.1576	14.6414	10.0911	16.8707	600.975	9.55838	3.29267	11.5337
TCGA-B0-4837-01A-01R-1305-07	0.115602	3	915.198	1230.84	2146.04	0.60582	0	0	0.342777	3.39662	3.78116	0.0619846	3.10662	0.0546699	2.88248	7.135	1197.68	0.529827	0.0825643	0.669125	0.241131	5.57513	3.43149	0.624018	4.61891	3.86795	1.83067	7.47514	14.7757	4.3303	0.319725	7.09932	19.625	5.22692	0.388143	1.23521	13.5681	1.19522	0.419037	1.13507	27.7029	17.7182	7.17838	3.91563	8.20758	23.5796	12.0599	0.64206	3.88396
TCGA-B0-4839-01A-01R-1305-07	-0.252255	3	873.85	1953.58	2827.43	0.523348	0	0	1.61258	4.70488	20.9147	0.101283	1.56158	0.0734418	2.17658	15.2155	1734.14	0.304178	0.149474	0.750275	0.0561985	255.359	14.7436	2.08124	4.63923	4.47066	3.17293	10.7352	32.8648	15.0733	0.192085	61.5702	8.22752	4.98339	0.406665	0.409974	25.1538	1.37587	0.229273	0.805576	59.4469	20.8525	39.1707	5.67108	17.3311	102.747	10.8802	0.370353	7.91658
TCGA-B0-4841-01A-01R-1277-07	0.0947956	3	912.762	1343.63	2256.39	0.592853	0	0	1.33491	1.21137	5.97272	0	0.711709	0.026637	1.60722	3.61014	824.438	0.133726	0.115656	0.268762	0	3.28681	8.2576	0.807468	3.01262	1.70919	2.13851	3.68647	12.6928	5.11647	0.265404	37.6727	10.8121	4.92669	0.138819	1.77834	7.61353	0.245201	0.313059	0.144957	21.1406	8.44255	20.8665	3.4031	4.10951	12.1147	2.34479	0.66968	5.28424
TCGA-B0-4842-01A-02R-1420-07	-0.146791	3	649.334	2293.22	2942.56	0.508873	0	0	0.637411	3.77559	10.3631	0.202233	1.44312	1.64667	3.93549	10.0468	2787.28	0.294476	11.872	1.80325	0.598466	73.3096	5.25027	0.799416	2.13355	6.7062	4.93864	18.3382	36.0099	12.1373	0.657496	13.7091	18.5722	5.82356	1.06143	2.44753	28.3639	1.15478	1.14897	2.24443	101.365	21.4997	37.8858	7.91636	26.34	1024.78	2.30733	3.4188	8.82068
TCGA-B0-4844-01A-01R-1277-07	-0.16533	3	174.457	1395.2	1569.65	0.670885	0	0	8.90843	5.3291	5.84811	0.15908	1.56717	0.487573	2.79208	7.88762	1381.99	0.654704	0.535627	1.51142	0.791145	41.8192	29.7811	4.83824	23.4506	3.44639	3.88482	8.61427	13.3073	6.54937	0.597012	166.608	12.0584	4.28186	0.57147	1.19245	18.1378	1.38061	0.310681	0.671327	37.7121	19.7134	23.6966	7.49618	13.6837	65.7237	5.30222	1.86498	42.5869
TCGA-B0-4847-01A-01R-1277-07	-0.195392	3	63.81	2648.86	2712.67	0.537627	0	1	2.43836	11.8697	18.7189	0.528307	5.63279	0.349118	11.1277	15.0165	3029.02	1.56819	19.4134	5.08913	4.08156	85.0617	15.0455	6.89949	6.47668	8.04215	6.46744	43.6907	43.8805	20.6614	2.92928	57.2372	6.95429	10.3272	1.68112	3.68019	42.9217	2.81906	0.809824	2.76232	88.182	37.4413	53.8944	16.1748	49.0775	133.317	1.93394	8.21852	17.3856
TCGA-B0-5084-01A-01R-1334-07	-0.220976	3	-386.13	811.479	425.349	0.785419	0	0	0.643608	2.2107	5.01467	0.0396957	0.779787	0.0534302	1.1823	4.45257	616.73	0.190746	0.610047	0.40732	0.339198	5.10933	6.30222	0.538192	7.20879	2.25651	2.40193	3.70602	30.2187	6.162	1.12979	14.9245	13.5845	3.06516	0.127194	0.396345	14.3086	1.01214	1.52337	0.137305	44.6811	26.2788	29.2124	5.02667	8.38771	21.6003	2.94368	1.52031	8.59704
TCGA-B0-5085-01A-01R-1334-07	-0.270301	3	102.877	1193.24	1296.12	0.700112	1	0	0.856931	1.73506	3.71521	0.0511421	0.431128	0.0231774	2.10544	4.34236	1376.26	0.279259	0.432729	0.561254	0.35674	1.62223	16.6667	4.12211	2.77897	3.70346	1.02815	5.65098	8.96008	4.14778	3.15917	8.12297	5.86179	3.95542	0.285869	1.0037	11.3956	0.602727	0.572038	0.577046	22.2165	13.8895	18.7383	6.47961	11.4154	9.5243	3.29397	0.552891	8.53339
TCGA-B0-5092-01A-01R-1420-07	-0.0498855	3	701.458	2718.04	3419.5	0.447409	0	1	3.69957	18.0674	27.9387	1.55507	8.58567	0.534352	16.7014	18.7774	4587.34	3.48601	24.6317	9.2354	4.23239	25.4847	10.3797	3.63664	5.58912	8.08475	7.79102	78.0452	48.189	24.7043	1.62207	82.0761	11.1406	16.5784	2.00082	3.28219	57.1848	4.81214	0.520632	2.12443	82.6622	28.9176	82.103	19.4671	51.8601	50.5311	7.16674	17.201	19.0009
TCGA-B0-5100-01A-01R-1420-07	0.237502	3	858.024	712.519	1570.54	0.670789	0	0	0.996914	0.842051	3.97529	0.0583662	0.45696	0.0484942	0.931664	2.03384	489.215	0.0584294	1.2844	0.256881	0.0254457	4.02023	7.65965	0.104012	3.2058	2.29032	2.05882	2.98802	8.25506	3.94868	0.123212	0.598606	20.3697	2.47235	0.147425	1.32566	7.41743	0.276212	0.156734	0.306787	20.705	20.2089	11.9644	2.52924	5.83638	21.9127	0.57227	0.382769	5.33961
TCGA-B0-5107-01A-01R-1420-07	-0.124015	3	-685.276	1820.09	1134.81	0.716821	0	0	1.16285	7.29808	13.5019	0.444899	0.384757	0.175482	5.37529	10.562	1863.24	0.822242	0.275141	2.69275	1.6199	3.00991	3.7693	6.83131	9.04717	7.21328	1.47913	23.5648	26.7785	12.1777	1.66832	63.3792	22.3797	6.36504	0.791744	1.64915	28.1634	2.26459	0.601533	0.746063	88.7607	35.1551	46.1868	12.0229	26.8912	16.5489	1.96511	7.59237	15.1627
TCGA-B0-5117-01A-01R-1420-07	0.121656	3	-417.751	-237.611	-655.362	0.873336	1	0	0.494845	0.471728	2.48616	0.133515	0.125312	0.0870392	0.341146	1.35067	366.31	0.0462667	0.344572	0.06974	0.0179102	0.342427	2.27587	0.188881	1.75099	0.505728	0.390146	0.373138	5.06949	0.714678	0.336691	0.0123922	8.31741	1.15576	0.035577	0.360295	1.8711	0.200305	0.0902605	0.0835874	5.82935	9.77412	5.01811	2.50104	1.53562	1.6437	0.584599	0.0628635	3.99882
TCGA-B0-5121-01A-02R-1420-07	-0.139969	3	767.856	1858.95	2626.8	0.548212	0	1	2.2173	6.16501	11.2797	0.126553	6.20221	0.0439711	3.60072	6.17204	910.867	0.621935	0.0913092	1.57403	0.214005	5.6854	15.4011	2.97203	5.60171	3.18303	8.00722	14.0343	20.9985	9.75067	0.400019	56.1283	9.12784	5.62103	0.707397	0.58988	18.9015	1.31219	0.224688	2.04435	33.6944	15.7319	17.69	6.51134	11.0139	4.75663	3.71945	0.979168	10.2801
TCGA-B0-5400-01A-01R-1503-07	-0.0921884	3	854.74	1940.27	2795.01	0.527397	0	0	0.492988	4.62465	4.07925	0.0901545	1.87276	0.231459	3.339	6.80876	3531.76	0.703967	0.49761	1.26518	0.306574	46.2204	4.27374	0.751895	2.58934	5.61834	4.61118	11.1564	28.545	8.01081	0.967259	35.9409	25.3404	5.03357	0.351337	2.08009	22.0652	1.11962	1.05642	0.94469	41.0057	19.7712	25.1712	7.478	16.2682	125.673	7.24169	1.42686	10.6418
TCGA-B0-5402-01A-01R-1503-07	-0.150336	3	904.246	1310.59	2214.84	0.597754	0	0	3.50132	8.2943	28.2876	0.132257	5.66454	0.338115	2.44062	11.2578	1366.39	0.57034	3.40592	0.910873	0.331174	6.92602	10.768	3.63472	6.57179	3.28228	3.42763	6.33959	31.3522	9.34247	0.363839	16.1872	7.71196	6.35173	0.446397	0.841921	30.9274	2.08339	0.953709	0.7866	27.1165	20.8128	17.8673	6.11873	7.6032	293.514	28.6052	0.830285	9.43529
TCGA-B0-5700-01A-11R-1541-07	-0.0728962	3	396.615	1270.74	1667.36	0.660181	0	0	1.78002	2.59411	12.9879	0.0796236	2.11491	0.0549605	2.46172	7.60917	2082.85	0.331102	2.95641	0.804083	0.21362	7.81703	10.6224	3.06492	5.76865	2.68493	1.89459	6.12284	19.7892	4.90687	0.191664	10.435	10.2759	5.75471	0.249298	0.677659	14.7075	1.22968	0.143542	0.585721	34.8112	26.2997	27.855	5.17676	9.02309	11.0768	7.01554	0.835483	15.5535
TCGA-B0-5702-01A-11R-1541-07	-0.15332	3	771.459	1793.05	2564.51	0.555837	0	0	1.77099	0.616951	8.33141	0	0.207299	0.545827	4.77951	12.0033	712.036	0.113388	5.66605	0.360822	0	194.559	4.65976	0.193773	0.417283	4.04683	0.375631	11.1953	3.47742	5.29941	0.0375067	14.8206	29.8623	1.39376	0.316065	3.63386	2.61714	0.205744	0.774221	0	28.9105	7.58573	28.4584	3.4702	6.10363	31.9244	9.34863	0.44018	4.04419
TCGA-B0-5703-01A-11R-1541-07	0.0419092	3	94.9883	1372.56	1467.55	0.681924	1	1	0.91748	10.8736	3.58464	0.106511	8.06419	0.0978111	5.48688	1.86455	631.311	0.909129	0.364018	2.35163	0.283499	9.64954	5.36427	6.22414	7.31935	1.09902	4.34269	14.7382	7.6566	5.70131	0.175421	108.954	15.9344	4.68052	0.84472	1.01355	14.4774	1.35861	0.919641	1.41435	12.1468	24.3005	20.0839	6.19979	12.3302	20.9491	1.1801	1.26466	8.08966
TCGA-B4-5835-01A-11R-1672-07	-0.402536	3	-186.821	1178.65	991.833	0.731296	1	0	2.9704	4.33689	10.8323	0.237032	1.80136	0.0911552	2.16705	10.4174	1453.41	0.355932	0.337153	0.694913	0.354301	10.3132	15.3654	8.76769	10.7829	5.0937	6.71183	8.73845	57.9683	8.77876	0.620634	1.32377	23.8198	3.90214	0.521977	0.35637	22.7322	1.64714	0.178554	0.999012	42.179	12.915	24.1449	7.53047	9.22129	13.169	5.33868	1.10145	12.4503
TCGA-B8-4153-01B-11R-1672-07	-0.121038	3	309.48	1158.65	1468.13	0.681862	0	0	1.68755	3.91296	17.4062	0.0562896	1.03021	0.00280613	1.79496	6.914	815.175	0.371914	0.085288	0.399217	0.166875	0.977663	19.714	3.8929	4.71138	2.78725	2.33686	4.69749	18.2262	7.23137	0.461332	90.0872	8.89937	4.47863	0.326608	1.07849	11.9159	0.818526	0.164899	0.44667	27.5455	22.1197	18.1751	5.5674	7.89517	5.31518	2.10859	0.521733	13.2551
TCGA-B8-A54E-01A-11R-A266-07	-0.467237	3	-594.233	491.843	-102.39	0.830964	1	0	2.82037	4.16566	15.1316	0.567349	1.35564	0.218017	0.994616	6.14604	533.224	0.212986	0.86986	0.67776	1.15428	10.6128	38.0567	0.879615	8.51604	2.18461	2.56573	3.9039	33.1195	5.82073	1.45307	0.199663	6.48132	2.26813	0.255901	0.510338	12.332	1.01532	0.12119	0.276567	28.4669	5.83615	5.76803	6.62461	6.25278	24.6863	4.81103	0.454753	16.0499
TCGA-B8-A54I-01A-21R-A33J-07	0.0429	3	599.212	2339.97	2939.18	0.5093	0	0	0.80276	7.97886	12.5678	0.25315	4.59548	15.698	5.3529	15.7907	2401.63	0.704643	5.05182	1.23917	1.04443	413.093	5.43823	3.02103	3.83996	8.15382	4.04598	10.5501	39.6606	19.0149	0.763651	75.2001	9.73287	6.55748	1.78058	12.0132	49.1982	3.59667	1.80877	1.28141	107.93	29.1228	23.3766	14.7212	22.4003	12852.1	29.2314	1.93282	12.9753
TCGA-BP-4159-01A-02R-1289-07	0.248791	3	1122.25	1666.03	2788.28	0.528236	0	0	2.29035	5.26552	16.9015	0.0902369	2.17105	0.0506077	2.10439	9.50166	712.946	0.440381	0.268564	0.995711	0.157361	5.91227	21.2391	3.50481	6.00923	3.22663	3.83341	5.41439	31.0684	12.7195	0.193292	12.3986	11.125	5.37665	0.278396	0.517454	24.1583	0.726285	0.69391	0.470481	47.2161	28.8869	21.1354	5.46825	10.3117	11.6888	3.88097	0.216986	11.1016
TCGA-BP-4167-01A-02R-1325-07	-0.0448563	3	1777.39	2816.72	4594.11	0.287338	0	1	1.23668	12.4028	17.3464	0.561006	13.5659	0.460634	9.2138	35.3865	3047.78	1.51966	0.523819	5.07928	0.767309	52.1563	5.58483	2.804	4.99286	13.7657	10.1706	48.6483	112.639	22.7184	0.737619	76.3576	15.6924	10.8433	1.64803	2.12242	74.1691	2.68645	1.16008	2.61865	140.627	22.7477	43.368	15.3883	29.5884	225.915	34.9167	8.81063	13.3955
TCGA-BP-4177-01A-02R-1420-07	0.0193748	3	373.453	256.637	630.09	0.766465	0	0	1.41657	2.09741	12.968	0.0602677	2.28938	0.118175	0.969802	3.3653	487.826	0.205132	3.25257	0.418337	0.0630594	4.36149	10.7034	0.286975	4.67889	1.12449	1.78793	2.30905	11.5832	3.66331	0.101781	0.174525	14.8835	2.77846	0.215729	0.065054	13.1044	0.44827	0.105932	0.335175	14.253	24.4118	8.04591	4.41947	2.91225	25.5926	3.37811	0.182689	4.27274
TCGA-BP-4326-01A-01R-1289-07	0.228471	3	845.447	1198.31	2043.76	0.617695	0	0	1.60069	3.51536	15.2567	0.140066	3.54492	0.21546	1.26725	6.33083	474.358	0.204317	0.684309	0.374402	0.488512	16.545	3.5504	0.308085	7.55616	3.71386	2.87212	1.70948	14.2106	3.70587	0.972017	9.68624	17.1468	4.07044	0.121298	0.993528	14.5958	1.22124	0.386872	0.211705	27.7175	7.658	5.79853	4.33593	3.18011	40.574	14.0543	0.601875	4.0464
TCGA-BP-4334-01A-01R-1289-07	-0.0408872	3	-822.693	187.322	-635.371	0.871903	1	0	0.348852	0.444473	1.35691	0.0144807	0.10601	0.0216566	0.232482	2.80109	733.223	0.0217445	0	0.0546276	0.0126262	0.370523	1.38102	0.182703	0.875921	1.12098	1.00194	0.175368	9.46486	1.08517	1.62914	0.139778	12.4081	0.853575	0	0.82061	3.4875	0.340564	0.360577	0.0147317	11.0791	9.5863	8.42584	3.62398	3.22023	2.66516	0.948582	0.164606	4.42608
TCGA-BP-4338-01A-01R-1289-07	-0.222655	3	-28.283	1416.35	1388.07	0.690411	0	0	0.955228	4.34794	4.94749	0.0980894	1.77329	0.319475	2.1323	16.152	655.768	0.245489	0.368015	0.522986	0.165353	20.0028	3.29384	8.67995	7.07752	7.05414	1.36626	4.87403	37.2071	7.43242	0.389775	2.96674	10.0747	3.60267	0.467206	0.661746	29.7955	2.00308	0.191567	0.651961	52.5522	16.2543	18.9857	6.33058	5.21385	31.5279	34.7789	0.365953	20.6352
TCGA-BP-4352-01A-01R-1289-07	0.0441665	3	-520.08	263.969	-256.111	0.843305	0	0	1.42041	0.506994	0.917763	0.0819979	0.190092	0.230957	0.576514	2.2876	203.043	0.0861911	0.159738	0.235093	0.243089	12.0483	4.05794	0.185872	3.06784	1.57188	0.294803	1.0472	11.1708	1.68984	1.21576	328.702	17.4492	1.36633	0.0994155	1.59318	3.70188	0.324548	0.300264	0.133471	16.0535	18.6422	16.1935	12.2881	3.13664	37.9917	2.88127	0.315479	5.53041
TCGA-BP-4758-01A-01R-1289-07	-0.0560094	3	681.258	2272.15	2953.4	0.507503	0	1	2.61836	7.3376	13.7827	0.332057	4.7198	0.251158	10.5269	13.1627	3790.24	1.12334	2.83367	4.25619	0.818676	116.838	14.5816	2.55798	2.98594	4.30956	4.33931	36.6756	29.3457	18.108	0.602868	65.0171	9.66502	8.76161	0.611489	1.72004	28.0989	2.17186	0.257165	1.12605	65.4295	22.6874	43.0205	10.3412	26.4945	90.6799	4.15087	6.47455	13.3889
TCGA-BP-4759-01A-01R-1289-07	0.107608	3	655.847	1336	1991.85	0.62367	1	1	3.14658	3.43692	9.02566	0.0876271	2.94275	0.0707258	2.77206	6.52651	587.672	0.225571	0.23483	0.912999	0.0800434	2.75012	21.4059	1.77216	8.12179	2.01839	2.39465	10.0792	17.488	6.76028	0.192754	57.2252	13.0299	5.6987	0.343294	0.326547	15.5526	0.736022	0.256701	0.551857	25.1561	18.546	20.3277	5.27766	7.66735	4.17385	3.66755	0.510812	13.699
TCGA-BP-4761-01A-01R-1289-07	-0.0636316	3	-202.523	1468.5	1265.98	0.703264	0	0	0.937685	1.89725	3.20746	0.181123	0.906644	2.58609	3.29611	4.4562	1592.62	0.767121	0.502622	1.26144	0.664106	274.728	14.8061	0.522397	3.13593	3.31861	0.894708	12.1179	8.43859	4.30897	0.297578	19.086	18.4429	2.19479	0.446433	2.92008	11.2428	0.832504	0.435362	0.255134	34.7844	26.94	29.6388	8.81098	11.7307	1013.49	2.98909	3.4599	13.2824
TCGA-BP-4776-01A-01R-1289-07	0.280707	3	609.734	1511.18	2120.91	0.60875	0	0	1.06376	2.8852	9.59029	0.103579	2.43733	1.86995	3.33404	6.48972	1131.78	0.399951	2.17793	1.14991	0.696708	6995.37	12.4339	2.20868	2.92385	2.33499	2.80047	8.19427	15.0088	7.92053	1.67575	55.8114	9.51554	4.96902	0.583053	1.35763	20.3038	1.0525	0.888623	0.361284	25.3093	28.3372	26.3194	6.65235	13.2297	965.617	6.82747	1.96667	5.36318
TCGA-BP-4799-01A-01R-1305-07	-0.0790691	3	1009.63	1949.17	2958.8	0.50682	1	1	1.26239	5.29491	5.72861	0.190458	1.93951	0.615935	2.41159	7.91577	747.354	0.498661	0.422821	2.24023	0.425812	10.8145	4.24258	1.95917	3.09186	2.02668	2.80258	10.8391	20.8514	10.6305	0.261975	50.1329	5.92259	9.06212	0.592088	0.131784	20.8234	0.794172	0.171675	0.467011	45.6793	17.19	16.7439	6.43286	4.47747	31.4194	5.85457	0.717395	3.69337
TCGA-BP-4960-01A-01R-1334-07	0.026968	3	1024.34	2052.68	3077.01	0.491785	0	0	0.513714	5.67396	9.66529	0.117346	1.83662	0.810917	3.405	13.0454	1383.42	0.473944	0.42041	1.03191	0.769149	73.1665	3.4602	3.10303	3.01332	6.54656	4.06242	7.44862	28.3872	9.39307	4.79359	92.0816	16.0285	7.37861	0.487089	2.17296	24.6042	2.12847	0.521571	0.444589	60.9868	24.7867	13.1822	7.119	15.0947	252.176	9.18473	1.19592	7.65368
TCGA-BP-4962-01A-01R-1334-07	-0.185191	3	1441.6	2204.53	3646.13	0.417416	0	1	1.71321	11.1319	22.0071	0.225117	6.91184	0.410264	6.26811	21.105	2318.72	0.653916	3.22717	2.60063	0.585644	135.343	8.82854	4.87405	5.46503	6.82263	6.50886	18.9092	79.0217	18.3516	0.49493	87.1692	11.2039	7.53372	0.520942	0.816622	44.4203	3.85915	0.518931	0.653269	70.3408	24.3662	32.9542	11.8683	19.1587	151.379	25.5761	3.42703	12.5045
TCGA-BP-4968-01A-01R-1334-07	-0.222577	3	675.838	1989.91	2665.75	0.543422	0	1	1.90835	8.70672	19.5248	0.315005	4.07451	0.347595	7.97881	12.9744	2232.48	1.08422	2.39025	2.80395	1.19124	94.1424	16.3613	5.0984	5.65524	4.29631	3.57259	22.7489	42.6101	12.1757	2.1202	71.6178	12.9812	6.97064	0.659005	0.553967	30.6116	2.14092	0.445847	1.01541	56.3717	19.2833	38.003	10.1573	20.3919	37.4993	7.00287	5.0013	13.212
TCGA-BP-4981-01A-01R-1334-07	-0.103949	3	195.272	1609.48	1804.75	0.6449	0	0	1.02674	3.75443	5.9158	0.0873551	1.88767	0.116892	3.03908	9.30737	2397.67	0.648969	0.218937	1.45693	0.513131	22.7726	10.0776	2.1414	3.96971	3.49595	1.89623	8.26083	16.6758	7.01392	1.56204	54.3431	7.38233	4.3925	0.4977	1.06699	14.8156	1.08262	0.350185	1.58094	47.5012	24.7328	41.0606	8.48151	13.0264	47.2029	1.86846	1.41512	12.1666
TCGA-BP-4992-01A-01R-1334-07	0.0814443	3	37.1294	2647.87	2685	0.541048	0	1	1.29645	9.07443	10.4422	0.742599	14.7189	0.791458	11.2502	12.787	1526.24	2.16869	12.7038	4.50545	4.70664	22.9603	2.63915	2.98331	3.45585	6.40195	2.78621	35.3866	25.8212	17.4625	3.72417	89.9599	7.24278	11.286	2.45265	5.90124	35.1457	2.82023	0.525103	3.07399	46.588	17.4427	21.2635	11.0057	27.0848	171.1	6.03873	11.5895	7.24511
TCGA-BP-5000-01A-01R-1334-07	-0.239404	3	1010.82	1970.85	2981.68	0.503922	0	1	1.7927	5.96914	16.1641	0.430136	5.36138	0.13574	5.22132	9.85035	1776.51	0.888857	0.41854	2.36999	1.00472	46.3131	13.264	2.64136	5.07639	3.96225	5.54654	20.0807	20.3067	11.1108	0.582153	40.6152	12.3015	5.6129	0.73817	2.03396	21.5961	1.60491	0.358369	1.55767	51.0619	25.2524	22.9379	8.5039	18.4198	41.1463	3.69182	2.43612	11.6754
TCGA-BP-5001-01A-01R-1334-07	-0.259927	3	209.074	1454.99	1664.07	0.660544	0	1	1.04701	4.73231	9.55585	0.113689	4.58919	0.115714	5.27117	5.08965	1077.49	0.882046	0.348617	2.08725	0.735211	9.07232	12.2624	5.49861	3.10312	2.76873	2.7635	17.2521	8.87656	6.52507	0.88235	32.7852	6.52546	4.9802	0.767137	0.997084	14.2629	0.893986	0.402436	1.57105	21.6004	13.3686	17.4274	8.58252	16.3983	15.4659	2.03358	3.14801	9.10868
TCGA-BP-5169-01A-01R-1426-07	-0.0327839	3	771.218	2428.92	3200.14	0.475969	0	1	0.381787	5.21255	3.92467	0.489016	5.69317	17.6158	6.58761	13.0047	1747.87	1.08618	1115.06	2.32905	1.43018	316.964	2.11878	0.976034	2.70238	9.08595	5.72914	23.4309	21.9546	20.3501	1.89764	2.70437	8.7263	7.04258	2.55861	6.87307	33.9161	2.65755	1.11919	1.80342	59.8763	23.3633	19.1939	9.83978	26.8159	7656.32	18.5374	5.1312	6.1061
TCGA-BP-5170-01A-01R-1426-07	-0.112686	3	1234.91	1540.3	2775.21	0.529864	0	0	1.02439	3.59898	14.4602	0.122696	2.26429	0.23447	2.43966	15.9956	1405.15	0.199597	2.53406	0.763727	0.0891524	80.5166	10.7633	2.11	3.9285	5.83331	4.12686	6.75413	31.9624	13.0168	0.182833	24.5753	12.6934	6.55406	0.33205	0.593221	37.6552	2.31085	0.449294	0.655322	67.7588	39.1245	10.9821	8.23585	14.2131	130.502	17.603	0.375503	6.89611
[truncated: 44 more rows]
[truncated: 71 more columns]
