# Supplementary material for: The role and therapeutic significance of the anoikis pathway in renal clear cell carcinoma
Source: Front Oncol. 2022 Sep 29;12:1009984. doi: 10.3389/fonc.2022.1009984 (PMC9557223; doi:10.3389/fonc.2022.1009984)
Supplement: Supplementary file 5 [file Table_5.xlsx]

## Sheet: multiCox
id	HR	HR.95L	HR.95H	pvalue
age	1.03188	1.01648	1.04752	4.29796e-05
grade	1.43276	1.12471	1.82519	0.00359694
stage	1.68256	1.07287	2.63872	0.0234303
T	0.851511	0.563949	1.2857	0.444514
M	1.41996	0.7178	2.80897	0.313759
riskScore	1.07432	1.03201	1.11835	0.000469782

## Sheet: uniCox
id	HR	HR.95L	HR.95H	pvalue
age	1.0297	1.01588	1.04372	2.188e-05
grade	2.28263	1.84053	2.83093	5.72809e-14
stage	1.92576	1.67699	2.21144	1.60471e-20
T	1.97255	1.66095	2.34262	9.64754e-15
M	4.49933	3.25415	6.22096	9.22085e-20
riskScore	1.1349	1.04434	1.2333	0.00285745

## Sheet: LASSOrisk
id	futime	fustat	CHEK2	ZNF304	MYBBP1A	BCL2	SRC	SNAI2	PDK4	TFDP1	NTRK2	STK11	IKBKG	riskScore	risk
TCGA-DV-A4W0	5.50137	0	1.09935	6.37307	8.41966	27.3764	8.91737	5.97107	53.0801	20.268	0.614944	6.97989	1.62755	0.7112	low
TCGA-AK-3440	4.78082	0	0.32823	5.85144	3.39463	6.04497	3.15534	0.6304	43.1017	6.30481	0.0799624	4.59854	1.43347	0.663162	low
TCGA-A3-3372	2.0137	0	0.884811	5.19938	6.32336	20.6648	8.12316	6.12633	354.926	14.4077	6.42645	6.18968	1.13251	0.625868	low
TCGA-DV-5569	0.972603	0	1.17506	3.73497	8.33346	12.1519	6.04011	3.33521	12.1545	15.6908	1.01301	5.03266	1.2033	1.08119	low
TCGA-CJ-6027	5.08219	0	3.04269	2.00522	7.75379	7.22414	11.4311	2.44527	18.908	10.9964	0.139351	4.50309	1.4195	2.77063	high
TCGA-DV-A4VX	4.45479	1	2.43146	1.24561	3.08247	6.56955	22.0547	0.90611	194.137	4.64939	0.127826	4.36462	0.937486	2.29443	high
TCGA-BP-5184	3.10411	0	1.23392	5.03677	4.54323	17.3684	7.12748	7.42952	169.01	19.9989	5.72032	4.18876	1.20978	0.617739	low
TCGA-CJ-6028	4.45205	1	1.29808	3.90796	4.52394	13.8214	7.42707	4.37693	85.1019	14.0516	0.525034	3.70071	1.04305	0.895475	low
TCGA-B0-5075	1.74521	1	1.48168	2.50471	6.03003	11.3498	10.4009	0.802471	16.9951	12.8396	0.435065	4.7293	1.23417	1.3182	high
TCGA-B0-4718	1.68767	0	3.88288	1.90123	7.62753	15.1825	6.94328	2.32973	63.9487	5.6845	1.52714	8.24759	1.13555	3.34073	high
TCGA-CZ-5985	4.46301	0	2.02569	3.69836	6.24585	14.5587	4.27854	1.27719	148.112	14.417	1.14576	3.07043	1.09701	0.947501	low
TCGA-B0-4833	6.53699	1	1.50548	2.92559	6.3882	15.2867	12.4425	3.60838	127.651	10.8844	2.48908	8.17124	1.07227	1.39158	high
TCGA-A3-3320	4.13151	0	0.754053	4.70672	5.60705	22.8872	7.6264	2.11994	658.793	11.4705	2.69833	5.73345	1.15439	0.508603	low
TCGA-CJ-4875	6.44658	0	1.93192	2.4435	5.62832	10.4319	6.92203	4.92652	12.0804	12.5013	0.306612	7.93157	0.823018	1.56414	high
TCGA-CJ-4640	5.47397	0	2.47654	3.90519	5.12542	20.3712	7.57753	3.56677	28.7796	16.1583	1.84995	5.0169	1.39469	1.16121	low
TCGA-BP-5004	3.08493	0	1.6974	5.33896	10.0327	23.5165	8.76294	5.59699	677.223	10.1767	0.361954	5.18543	1.01605	0.871086	low
TCGA-B8-5159	0.657534	0	0.986625	4.70653	6.01216	24.5165	8.15602	2.28636	1243.52	13.5311	0.34647	4.74082	1.02691	0.356824	low
TCGA-B0-4810	1.30959	1	2.16763	2.68517	9.2942	6.55068	11.8941	7.55219	33.1291	16.4793	3.51448	7.36749	1.79049	2.47355	high
TCGA-CW-5589	6.51507	0	0.858637	4.2237	5.93099	15.2361	7.39281	7.50163	107.492	16.2342	1.64626	5.64135	1.35979	0.936754	low
TCGA-B8-A8YJ	1.18082	0	1.20242	3.82398	8.4859	8.92024	7.32838	26.632	189.881	18.1735	3.59916	7.76792	1.60595	2.68181	high
TCGA-B0-5696	4.73151	0	1.01763	2.26171	4.98796	12.1038	8.91319	4.40251	87.1519	13.9445	1.30725	6.33752	1.41272	1.27773	high
TCGA-BP-4993	0.484932	0	0.898771	3.70549	8.02376	18.9276	5.00272	8.57418	134.395	13.243	4.01852	5.98589	1.41985	1.21029	high
TCGA-CJ-4890	5.71233	0	1.67688	2.98293	5.88199	4.99873	8.18199	11.4043	118.063	17.0496	1.56158	5.48397	1.19466	1.60178	high
TCGA-B0-5698	7.07671	0	0.821224	3.13898	6.06315	28.3433	5.8423	1.5752	50.8985	20.4641	0.167044	4.30878	1.14907	0.643536	low
TCGA-BP-4341	4.35342	1	1.2553	3.72538	6.65838	12.7464	12.237	2.55097	263.417	9.40115	1.41157	7.57821	1.00344	1.11414	low
TCGA-B0-5697	5.0274	0	2.0929	2.81072	9.8385	12.464	21.6586	1.55597	14.487	16.1391	0.590548	5.33031	1.6468	2.10716	high
TCGA-CJ-4641	4.55068	1	1.88204	3.38674	7.0773	12.6348	12.4761	4.51931	46.8317	15.2844	1.96815	5.52205	1.71749	1.60026	high
TCGA-B0-4811	3.88219	1	1.60647	1.9075	6.22379	5.25685	11.9898	2.99335	23.2285	7.19203	0.436483	6.50417	0.573856	1.85087	high
TCGA-B0-5402	1.23014	0	1.11692	4.18907	5.48141	18.8935	5.03004	3.09312	1388.87	11.428	0.666177	3.71374	1.2079	0.405062	low
TCGA-DV-5565	3.6411	0	0.786028	3.30431	10.2902	4.44102	4.42676	9.21014	52.6211	10.2403	1.51979	6.19104	1.0302	1.77222	high
TCGA-BP-4994	3.58356	0	0.556032	6.48887	4.02049	20.3173	6.73657	1.35526	23.9581	12.9576	0.355462	5.93864	1.33009	0.502197	low
TCGA-BP-4798	0.915068	1	2.39211	2.79575	5.30991	13.1086	7.5319	9.50933	98.9513	9.41147	2.78975	7.31956	1.6207	2.39667	high
TCGA-CJ-4891	2.24384	1	1.76595	1.26894	8.58628	5.10103	13.2523	5.7614	33.5528	8.58807	0.33087	7.44331	1.67938	3.45409	high
TCGA-CJ-4872	3.93151	0	1.4712	2.7873	5.03633	7.18442	6.44579	9.06085	58.8665	12.9324	2.8749	4.40161	1.18458	1.51775	high
TCGA-BP-4797	3.03288	0	1.14326	4.34462	4.54888	13.7753	6.31485	4.12735	37.6691	14.5342	1.10573	4.37457	1.27531	0.848989	low
TCGA-CZ-5989	4.38082	0	1.64331	3.90444	0.454707	43.6829	1.40193	14.9035	96.8726	12.4808	9.71081	0.415533	0.0990803	0.610904	low
TCGA-B8-4622	0.49589	0	1.50678	2.21807	4.58008	18.1728	8.11001	4.01008	810.893	11.8827	0.481359	5.65533	1.29112	0.88983	low
TCGA-BP-4340	1.53973	1	1.26374	3.37695	4.98252	21.081	8.30098	1.58191	102.81	9.57912	0.0838665	6.29047	1.10949	1.02966	low
TCGA-BP-4170	6.41918	1	0.932261	4.62454	5.252	18.1668	7.36665	2.40074	319.569	11.1939	0.533975	5.23301	1.27986	0.71712	low
TCGA-CZ-5982	5.59452	0	0.844425	4.85602	9.59617	35.3393	9.30709	6.01564	250.718	19.3396	4.05377	3.88706	1.03764	0.614726	low
TCGA-AS-3777	3.39178	0	1.72309	2.13729	2.35366	3.04296	1.93626	1.56377	16.3459	6.11146	0.110611	2.10933	0.972751	1.36409	high
TCGA-BP-4977	1.24384	0	1.22428	2.63506	4.53305	11.126	8.6633	1.82217	35.5523	18.784	0.85479	5.92122	1.51957	0.996632	low
TCGA-B0-4834	5.72603	1	0.460264	4.35048	4.12984	3.85955	4.88172	2.60321	9.82345	9.89624	0.589313	3.75542	0.945373	0.780366	low
TCGA-CW-6093	8.61918	0	0.934407	5.09255	7.15269	17.4833	5.00177	8.57583	205.348	15.8856	0.684391	4.32288	1.38416	0.853388	low
TCGA-CW-5585	7.14795	0	0.827973	5.77932	5.47099	34.0775	10.7279	5.22672	554.042	18.5001	2.49513	6.28145	1.09668	0.393482	low
TCGA-AS-3778	0.117808	0	2.0976	4.37832	6.63856	20.1035	7.43865	3.00273	210.837	17.3307	0.278542	6.72111	1.41214	0.953361	low
TCGA-BP-4976	4.47123	0	0.661768	5.24032	6.24441	21.7201	6.44015	2.8306	136.138	18.5818	0.318869	3.95439	1.05685	0.508534	low
TCGA-BP-4774	5.16438	0	1.11247	4.12912	7.10282	11.6443	13.509	3.70652	223.391	14.4052	0.386702	8.0354	1.47564	1.10393	low
TCGA-BP-5183	3.53699	0	2.47754	3.40331	10.0663	15.2003	9.56035	1.9379	153.627	25.3497	0.190258	6.35059	1.60657	1.20014	high
TCGA-CJ-5686	5.58356	0	1.58812	3.40911	6.68578	14.2521	7.68312	3.00974	120.909	16.3572	1.4971	4.43582	1.28051	1.04084	low
TCGA-BP-5169	0.528767	0	3.01443	0.657841	13.2976	3.70994	6.56566	8.64037	361.85	5.45686	0.325539	5.01161	0.704407	4.6733	high
TCGA-A3-A8OW	0.884932	0	0.830054	4.87768	6.29394	16.1924	8.74995	3.67445	352.262	17.7066	0.427727	7.4863	1.81858	0.715003	low
TCGA-BP-5010	2.40548	1	1.9662	2.46292	7.21262	5.25267	9.19061	6.06056	28.1525	9.1755	2.23496	5.81533	1.00336	2.12959	high
TCGA-CZ-5454	1.97808	1	1.92073	2.07487	3.68991	17.8695	5.31259	2.01621	116.275	8.11101	0.108684	2.57933	1.01661	1.31395	high
TCGA-A3-3387	1.69041	0	2.0912	4.07885	6.81366	12.6424	12.8892	8.1336	84.3959	17.0165	3.3019	5.45839	1.50815	1.49196	high
TCGA-BP-4768	1.09589	0	1.27326	4.11371	10.727	22.6195	5.13378	1.77726	63.7972	12.6111	0.0478573	6.36184	1.05585	1.09195	low
TCGA-BP-4335	1.30137	1	1.60709	2.91331	6.44794	9.98517	7.03624	3.16738	81.8	11.31	3.80911	5.79383	1.10099	1.31892	high
TCGA-BP-4352	0.942466	1	5.92826	2.70983	10.0967	1.30118	21.4611	3.99856	1.78104	5.36037	0.0483831	5.44428	1.91131	9.8414	high
TCGA-BP-4766	4.00548	0	1.50421	5.81991	8.61093	22.0025	9.99926	3.00207	118.765	19.5027	0.445414	6.93755	1.20304	0.711671	low
TCGA-B0-5702	4.39726	0	1.55015	0.767206	2.19771	3.73309	2.38102	0.366997	18.3575	3.05952	0.326738	10.1359	0.0131842	1.46273	high
TCGA-A3-3335	5.16712	0	2.26971	2.238	5.83262	10.402	6.78613	1.2488	297.78	12.2504	4.022	4.86383	0.864584	1.18614	low
TCGA-B2-4102	0.553425	0	1.71664	6.02211	6.30033	20.8192	8.83152	3.29601	77.0144	15.4479	5.55655	6.58041	1.4565	0.751615	low
TCGA-BP-4964	5.10137	0	1.67049	3.07987	4.86444	14.1588	7.76604	4.89708	339.738	9.20345	0.455557	4.95155	0.96769	1.16902	low
TCGA-A3-3359	6.86027	0	1.15104	5.98546	5.80288	19.05	9.66611	2.60202	690.168	15.9186	1.46651	6.05048	1.22816	0.439353	low
TCGA-A3-3352	1.53699	1	1.60785	1.86263	5.82466	20.8859	9.1266	4.20343	238.529	16.3509	0.248998	5.62685	1.164	1.19278	low
TCGA-B0-5709	8.53973	0	1.07791	4.59898	7.1057	14.7425	13.9842	7.03838	28.3518	17.0592	2.35928	5.06573	1.68956	1.16329	low
TCGA-B0-4945	5.87671	1	2.32323	4.78498	5.92562	11.0024	8.78286	5.72801	141.565	14.3627	1.32237	6.63786	1.72033	1.36958	high
TCGA-CZ-4860	0.564384	1	3.25389	2.19476	5.37648	0.816785	12.4955	2.62564	0.598469	4.84483	0.0359551	3.24297	1.35066	3.25675	high
TCGA-AK-3455	1.87123	1	2.64276	2.94025	5.19636	14.6893	7.96229	4.94725	256.615	16.0446	1.21794	4.35997	1.41356	1.36746	high
TCGA-AK-3461	2.33699	0	1.30693	4.14733	8.45171	32.3081	5.22304	7.14605	935.265	18.469	3.36878	5.44711	1.09477	0.518433	low
TCGA-B0-4697	1.58356	1	2.92477	2.26336	10.5697	3.92194	20.6027	4.76798	18.6661	11.244	0.484751	7.24518	0.794633	3.38442	high
TCGA-BP-5199	3.71233	0	1.43353	3.63173	8.59455	7.94938	8.71236	12.093	13.0236	15.4147	4.90847	7.34442	1.59842	1.9697	high
TCGA-BP-5192	1.95616	0	1.32821	5.69244	5.94524	18.7063	8.48552	2.29057	119.567	15.084	0.420497	5.41709	1.11702	0.661747	low
TCGA-A3-A6NL	1.88767	0	1.45418	3.88037	8.56351	11.299	11.3941	5.69328	86.3952	14.8312	0.489622	7.54798	1.89318	1.66306	high
TCGA-B4-5834	0.10411	0	0.691527	4.56955	5.23782	23.1685	4.95159	10.6567	780.805	16.165	1.84447	4.77829	1.17768	0.542683	low
TCGA-6D-AA2E	0.991781	0	1.2551	2.86122	5.02466	9.91834	8.38772	8.16146	75.5936	13.5394	4.8249	9.94842	1.45285	1.49804	high
TCGA-BP-4165	8.32055	0	1.35777	3.70958	7.12078	9.42043	10.9353	6.49394	83.1499	10.1885	0.204617	7.84276	1.03527	1.54524	high
TCGA-B0-5115	2.18356	0	1.24412	4.0425	6.86149	19.2991	7.87254	5.05972	31.6584	18.144	5.33729	6.17749	1.3644	0.90953	low
TCGA-B0-4698	0.115068	1	7.57844	1.6452	17.5328	1.64509	12.6797	58.7777	9.63033	28.9431	0.0305114	10.0555	2.06866	99.196	high
TCGA-BP-4985	2.60822	1	0.699764	2.27819	7.25955	7.38571	18.5521	5.01122	6.16022	8.4098	0.964015	2.63676	2.03836	2.33673	high
TCGA-B0-4696	2.3726	1	4.17327	8.73453	20.2877	1.32638	12.1598	18.2592	0.99151	25.9605	0.0658997	4.02547	2.99047	4.64798	high
TCGA-CZ-4859	4.89589	0	0.91106	5.95259	5.26116	24.9606	7.2995	1.89603	205.168	15.1078	0.412285	4.38092	1.01707	0.471318	low
TCGA-B0-4847	2.1726	1	3.08699	1.60145	7.05167	8.65183	11.6399	1.45303	27.9378	9.13056	0.256521	8.22582	0.99751	2.72331	high
TCGA-CJ-5675	6.65753	0	2.39156	3.00211	8.85164	21.1166	10.4022	1.59854	54.4323	19.8383	1.05014	4.77222	1.26537	1.27796	high
TCGA-CJ-4639	6.32329	0	1.04364	5.37265	5.77725	19.8431	7.133	5.7998	55.6232	14.1943	0.32498	5.26015	1.09639	0.772106	low
TCGA-B0-4848	2.41918	1	1.82456	3.10404	7.34171	10.8284	8.98603	3.69458	3.7507	12.6463	1.3054	5.5825	1.24405	1.57652	high
TCGA-B0-4846	3.28767	1	1.23595	2.51243	4.90695	19.3344	8.59251	3.02457	210.672	12.9323	1.89475	4.57972	1.49699	1.09357	low
TCGA-BP-5170	6.60822	0	2.47319	2.33742	5.515	12.5484	5.13418	4.75407	76.5088	9.86191	1.24282	3.25324	1.01759	1.75489	high
TCGA-BP-4332	3.10411	0	1.78652	4.96714	6.74539	20.7461	4.64168	7.30898	42.1397	21.4685	1.66229	5.58817	1.19957	0.819223	low
TCGA-BP-4355	2.61096	1	1.20241	4.26123	7.99781	8.84865	8.62787	6.95614	103.831	12.7156	1.75009	7.68194	1.05721	1.26831	high
TCGA-MW-A4EC	1.36438	0	1.21065	4.94001	10.5341	10.5128	5.3132	2.80828	284.537	13.4766	5.94245	6.05101	1.37705	0.917283	low
TCGA-CJ-4887	2.55342	1	2.04912	2.77181	6.31799	8.88832	9.4911	4.50801	161.14	14.1361	0.358749	7.19788	1.24503	1.55701	high
TCGA-B0-5088	1.54247	1	1.00491	2.98834	5.42174	8.08135	8.48651	3.3123	68.0859	12.1384	0.420169	6.54287	1.16718	1.18379	low
TCGA-A3-3317	4.08493	0	1.53751	6.25452	8.8686	23.3717	8.42931	6.25681	17.7205	16.3079	2.2915	5.45032	1.22865	0.864159	low
TCGA-BP-4781	5.69863	0	1.17687	4.10565	6.35772	11.3037	5.27817	7.24647	75.3811	10.397	0.113874	4.79422	1.10792	1.23555	high
TCGA-B0-5705	10.0493	0	0.731198	4.23308	5.59963	15.8561	13.4161	1.59972	165.993	14.341	0.233721	4.80946	1.98844	0.925579	low
TCGA-CJ-4888	4.29315	1	2.50808	3.00732	7.87109	7.32386	12.8775	6.27889	193.821	9.66051	0.785777	6.60477	1.57026	2.54709	high
TCGA-A3-3316	4.09041	0	2.15524	4.37143	6.17984	8.77989	5.43952	11.0817	65.4095	13.1872	0.848282	3.20238	1.20607	1.58933	high
TCGA-CJ-4886	5.34795	0	0.860865	4.65686	6.12227	13.7706	7.48247	8.68496	127.983	14.5932	1.27845	5.3757	1.29488	0.975502	low
TCGA-BP-4162	8.42192	0	0.834598	4.5761	5.1384	10.6226	7.42203	1.54191	599.592	9.87313	0.213215	4.60412	1.34691	0.647587	low
TCGA-CZ-5467	0.2	1	1.00285	4.0364	5.56375	29.3616	4.28823	3.58241	196.253	9.93013	0.627878	4.51323	1.34818	0.843412	low
TCGA-BP-4989	0.323288	0	2.25703	2.80291	8.03943	7.27803	7.83031	6.88461	201.012	12.959	0.5164	6.12785	1.48002	2.0675	high
TCGA-B0-4828	0.841096	1	1.81961	0.930748	7.28252	17.2352	11.9713	2.3576	167.205	11.4417	0.430646	6.45534	0.873076	1.7902	high
TCGA-BP-4982	2.77808	0	1.26446	5.24382	4.12785	21.3741	9.14068	5.46373	136.06	21.1423	6.47564	5.45482	1.32973	0.550257	low
TCGA-B0-5119	0.161644	0	0.783946	5.88179	6.86958	22.7303	7.43256	5.85221	294.57	15.1295	3.01259	4.65495	1.09943	0.566583	low
TCGA-CJ-4912	4.53973	0	1.81311	2.56631	8.53872	6.70595	10.5788	1.89229	161.883	14.8775	1.14226	7.33353	0.904423	1.40803	high
TCGA-BP-4169	1.92055	1	1.51745	4.36329	7.02277	11.2288	6.64478	8.97049	87.3876	11.3856	4.66043	6.03606	1.86551	1.60926	high
TCGA-BP-4963	5.02466	0	1.12336	3.35592	7.00701	13.504	9.25862	3.52819	343.109	15.9228	0.612192	6.5514	1.57498	1.0069	low
TCGA-CZ-5468	0.161644	1	1.26159	1.51278	4.94429	1.15538	15.0401	22.5593	27.3622	10.5777	0.00522187	3.84552	1.56682	4.50405	high
TCGA-BP-5195	2.05205	0	1.36679	4.16017	5.96669	17.854	5.68044	5.91532	81.5334	12.8136	2.72148	5.63435	1.1568	1.02176	low
TCGA-B0-4827	2.42466	1	2.06284	2.6049	8.39977	3.17748	9.04107	4.44851	32.2522	20.5483	2.68692	5.64483	1.44803	1.59121	high
TCGA-CZ-5466	1.87671	0	1.71375	2.46864	7.48965	10.874	9.83579	1.92045	52.2047	9.15177	0.454685	5.93028	1.41675	1.86849	high
TCGA-B0-5107	2.53973	1	3.87501	1.30981	9.28062	13.8042	21.5789	0.221775	0.995925	18.4998	0.0781107	8.95258	1.178	3.09078	high
TCGA-CJ-6033	0.613699	1	1.50144	2.24048	8.28405	8.01156	10.1829	7.55457	15.9029	13.647	1.54975	6.42694	1.31554	2.09469	high
TCGA-CJ-4907	4.10685	0	1.06959	4.44047	5.04767	20.2436	7.44199	7.70005	96.4121	14.8212	0.404428	6.18844	1.22843	0.924088	low
TCGA-CJ-4635	3.87945	0	2.84058	5.54927	7.75751	24.0022	5.00597	4.14886	29.0058	15.9342	3.19481	6.72185	1.4456	1.12234	low
TCGA-B0-5108	2.49589	0	0.996699	2.98913	6.97411	7.69096	8.18501	10.8545	101.582	12.8703	2.36371	4.95448	1.16086	1.59133	high
TCGA-CZ-4861	1.22192	1	1.90028	3.15475	4.73173	14.0509	8.92478	2.42231	16.879	16.4865	0.508246	4.52071	1.0939	1.06393	low
TCGA-CJ-5679	1.86027	1	4.28205	1.83754	7.57533	2.28991	8.1885	24.8407	177.531	7.01587	0.253164	4.56547	1.54196	10.0241	high
TCGA-CJ-4908	4.19452	0	1.33425	4.27725	7.11641	19.0097	8.05123	11.145	152.43	18.374	1.33539	6.45442	1.46473	1.18	low
TCGA-CJ-5672	5.40274	1	1.01986	2.56308	8.39377	10.109	12.09	3.36862	66.2009	13.2088	4.37812	6.52158	1.5589	1.54646	high
TCGA-AK-3460	2.60548	0	1.43353	3.87051	5.50721	18.3526	4.74371	7.62248	765.642	16.4942	3.27173	4.466	0.948743	0.605168	low
TCGA-B0-5106	4.37808	1	1.45039	3.10789	8.25977	13.8276	7.30494	6.1901	103.649	9.93415	0.620165	6.73678	1.18601	1.68737	high
TCGA-EU-5905	0.326027	0	0.870101	3.56154	7.50639	9.14628	7.96753	3.61971	345.41	8.14292	0.582632	4.42752	1.31196	1.16123	low
TCGA-B2-5639	1.14247	0	1.25029	2.15468	6.60529	16.076	10.4793	1.32157	41.8283	16.6524	0.285735	6.07213	1.32072	1.20041	high
TCGA-MM-A84U	1.91781	0	1.75387	1.78599	6.7041	6.88956	13.8951	3.7649	25.9	12.5049	1.07026	8.77088	1.26826	2.09833	high
TCGA-CJ-4895	3.28767	1	2.01407	2.95126	7.23615	14.9336	9.5335	8.26573	38.9589	18.2343	1.41303	5.96056	1.29702	1.60838	high
TCGA-B0-5095	0.671233	1	1.66203	3.33963	6.97719	12.7904	8.74866	22.2169	29.0176	15.1507	2.6103	6.00533	1.61079	2.95347	high
TCGA-B0-5694	1.31507	1	1.24484	3.52109	5.17891	12.9577	5.6096	3.57143	30.7698	11.7503	0.476082	4.74173	1.21868	1.09384	low
TCGA-BP-5007	3.12329	0	1.11423	4.31087	5.43065	20.4334	6.19115	4.42975	448.3	13.82	0.422474	5.75862	1.33543	0.716152	low
TCGA-B0-4701	0.652055	1	1.58343	2.64684	11.7261	30.1049	15.0031	3.65329	241.974	16.9949	2.63018	6.80163	1.31123	1.42487	high
TCGA-B0-4815	4.35068	1	3.29914	2.45151	10.4752	4.75199	15.8391	6.60182	17.8514	10.313	0.395213	6.48178	1.91102	4.84897	high
TCGA-BP-5008	2.93425	0	1.36037	4.07697	6.32139	18.5972	5.41349	4.75274	24.2048	17.467	2.52128	5.39022	1.45483	0.938834	low
TCGA-BP-5006	2.30137	0	0.848142	4.83414	6.33865	12.958	8.96592	2.90718	166.863	15.7906	0.0995302	6.00114	1.1869	0.725509	low
TCGA-BP-4342	6.18082	1	1.79209	2.56996	6.66839	10.6824	8.04448	9.73946	294.88	10.3162	0.604253	9.21049	1.33445	2.04592	high
TCGA-B8-4620	0.619178	0	1.70434	1.40825	5.07273	8.9982	7.77193	7.3819	1030.33	8.56766	0.125691	4.7209	0.943313	1.18805	low
TCGA-BP-4349	1.01918	0	1.14001	3.87529	7.77273	13.9361	8.78252	10.4083	468.22	11.2797	2.61591	6.83138	1.26196	1.26728	high
TCGA-AK-3429	5.52603	0	1.48852	4.10226	5.10593	8.31174	7.36098	2.53166	56.3117	7.35528	0.0538269	5.24947	1.07413	1.20975	high
TCGA-CJ-4870	4.10411	0	1.04517	2.91374	6.01088	17.655	6.65037	3.05952	97.6361	17.1167	3.51553	5.42266	1.26848	0.889725	low
TCGA-BP-4973	3.79178	0	1.0303	3.04884	6.68208	27.3746	6.06383	3.10989	215.639	11.5051	0.75955	5.39012	1.25269	0.97926	low
TCGA-CW-6097	1.56438	1	1.81337	2.98565	10.0546	20.4933	10.2649	7.11917	62.4986	15.3183	1.51731	4.32566	1.58707	1.89086	high
TCGA-B2-4098	0.139726	1	3.37372	2.68614	7.695	3.01929	16.5447	0.902419	2.27851	8.83378	0.292556	4.96898	1.3616	3.02438	high
TCGA-A3-3325	3.20548	1	1.3682	3.28303	8.28944	18.6493	10.0912	6.14525	240.414	20.1899	0.553207	6.94468	1.61241	1.15595	low
TCGA-B0-4714	0.271233	1	1.35086	2.956	5.9554	11.7828	11.1044	3.40899	49.8259	9.41323	0.545468	7.55783	1.46763	1.62511	high
TCGA-CW-5581	7.66849	0	0.769722	4.4832	5.39674	23.3673	6.00801	2.83375	62.6005	11.2518	3.35144	4.98038	1.86225	0.878836	low
TCGA-B8-A54D	2.27397	0	2.04102	3.01899	6.51439	15.2509	13.6644	1.77253	57.3396	10.1204	0.160899	7.59447	1.71929	1.90063	high
TCGA-CJ-5683	5.17534	0	0.954271	2.90196	8.50112	13.7935	7.25499	3.31639	349.408	16.6696	1.13428	5.68333	1.06695	0.905715	low
TCGA-BP-5186	1.89863	0	0.885924	5.83039	6.36	19.5716	10.1129	6.85338	33.0586	19.5963	7.43716	5.28631	1.35312	0.632875	low
TCGA-BP-4325	8.12055	0	1.25634	5.40301	6.06064	27.0842	9.0119	2.7018	170.711	15.6362	0.34242	5.06735	1.04145	0.610537	low
TCGA-AK-3445	3.50685	0	2.93335	3.95192	7.47414	7.05527	10.7115	5.03099	203.545	8.25079	0.652122	5.51184	1.10219	2.02722	high
TCGA-B0-5400	3.10137	0	2.82847	1.20767	6.01264	4.38314	12.169	5.37489	80.5005	7.90711	2.41182	6.80376	1.29864	3.27703	high
TCGA-BP-5187	1.11233	0	1.52386	3.76144	4.95204	22.6689	5.14817	8.42067	300.949	21.1387	7.57554	4.0525	0.914151	0.633641	low
TCGA-A3-3349	3.79452	0	1.35272	5.67306	7.10694	15.1805	7.44741	11.6541	53.1248	16.3085	3.93336	6.38431	1.26795	1.05375	low
TCGA-BP-4777	4.74247	0	1.76012	3.53044	5.20528	10.4666	5.19919	3.48835	93.1817	15.9996	2.99657	4.78268	1.23409	0.996515	low
TCGA-B8-4621	1.18082	0	2.27191	1.98476	5.14359	7.12131	8.50414	0.557878	32.8708	10.8125	0.404119	3.23593	1.10828	1.63467	high
TCGA-B0-5099	1.32877	1	2.25571	4.96238	7.9147	16.732	11.2715	3.99534	45.9544	9.19153	0.500618	5.28089	0.875949	1.38034	high
TCGA-B0-5092	1.25753	1	1.86884	2.60163	7.95412	6.42894	15.5549	5.56049	108.9	11.0648	0.650366	7.70768	1.66982	2.48617	high
TCGA-CJ-4899	4.1863	0	1.19279	5.23115	6.20724	20.3234	6.42448	7.58305	70.5196	17.155	10.7578	6.06319	1.3107	0.72682	low
TCGA-CJ-4871	6.63836	0	2.22805	3.85399	3.93938	11.8176	5.18284	3.85051	50.8309	13.591	8.43887	6.15748	1.05497	0.996583	low
TCGA-CJ-5684	6.11233	0	0.890818	3.7484	6.57099	13.9982	6.77361	5.34937	56.1249	11.5361	0.341231	4.85783	1.22144	1.1385	low
TCGA-BP-4776	1.12603	0	1.29431	3.13937	6.10718	11.6689	7.5908	3.36809	79.8777	13.5993	1.77038	6.42725	1.0541	1.10817	low
TCGA-CJ-4892	4.16712	0	1.03664	3.61932	6.29879	9.60025	10.2985	5.81052	240.178	11.0378	1.25143	7.44957	1.17009	1.20288	high
TCGA-B2-5635	0.863014	0	2.0961	6.00915	4.71196	39.2956	3.31022	3.1504	383.604	10.4803	0.495818	3.25142	0.823779	0.525385	low
TCGA-CW-5580	5.38082	1	2.00142	4.83815	4.84209	19.5348	9.08013	4.10164	412.047	14.5418	2.18351	3.77571	1.02119	0.70981	low
TCGA-BP-4974	0.578082	1	1.35497	5.98209	8.98845	8.78054	7.74904	5.46039	61.4657	16.6809	1.33048	7.06231	1.49883	0.993023	low
TCGA-B0-4837	3.77534	1	2.29387	1.91229	6.57585	4.3396	6.17016	16.1057	76.5132	9.61713	0.206893	8.11284	1.21879	3.7499	high
TCGA-B0-4713	0.553425	1	1.18197	1.54778	5.54728	5.29824	14.3741	2.65615	26.6094	8.46891	0.369791	4.29881	1.36746	1.97415	high
TCGA-B4-5377	1	0	1.13728	4.13366	5.77905	25.641	8.91302	1.90213	594.457	19.3756	13.8853	5.41275	1.1671	0.401964	low
TCGA-B0-4819	0.50137	1	1.73399	2.40458	6.43623	7.16336	12.6959	4.04303	23.8939	11.1332	1.30032	5.05332	0.786444	1.6543	high
TCGA-B0-4838	2.28493	1	1.26399	4.16771	7.93795	20.9023	10.1664	3.30403	555.664	15.4928	1.24932	7.30432	1.36863	0.782005	low
TCGA-B0-4836	3.39178	1	2.92114	3.10044	5.49525	5.80927	8.33404	17.3865	229.526	10.5401	4.2568	6.9672	1.19506	3.0073	high
TCGA-B4-5378	0.479452	0	0.831372	7.20385	6.18194	13.1615	7.39002	7.61332	537.248	14.7581	2.1824	6.66473	1.35325	0.511061	low
TCGA-B8-A54J	1.44658	0	1.04446	4.07493	8.52037	23.6029	10.6909	5.39799	47.028	19.0738	0.444526	10.0576	1.7379	1.14341	low
TCGA-CJ-4642	4.46027	0	3.51907	3.5139	5.63214	10.625	8.26304	2.23051	67.889	15.7088	1.20438	8.19513	0.655611	1.42655	high
TCGA-A3-3329	4.44932	0	1.11125	1.76325	4.53042	22.3004	7.39145	5.94069	535.896	13.1976	0.329343	6.14792	0.754034	0.891448	low
TCGA-A3-3322	4.04932	0	1.25634	4.61755	7.581	16.7425	5.85507	4.80269	67.5171	12.0648	2.60347	5.2786	1.13151	1.0077	low
TCGA-AK-3425	9.1589	0	2.35806	2.68394	5.57607	7.7613	6.87328	6.94182	34.501	13.0002	0.524244	3.37072	1.34952	1.91266	high
TCGA-BP-4345	4.15342	0	1.43109	3.03765	6.52779	5.50039	8.88192	21.4906	32.7925	13.0328	1.20262	6.49719	1.61663	3.25558	high
TCGA-BP-4998	2.55342	0	1.80432	4.14262	7.85875	17.7624	7.7628	5.55586	36.7906	14.4894	2.72382	7.03595	1.61062	1.40122	high
TCGA-B0-4700	5.42466	1	2.1691	1.96933	8.18479	4.71502	16.8141	9.77399	37.7094	11.9587	0.430341	5.66759	1.44807	3.38503	high
TCGA-B0-5693	8.4274	0	0.989147	5.33354	7.47957	28.7222	6.71034	3.76291	285.997	16.9877	4.16549	5.30121	1.55856	0.60321	low
TCGA-A3-3370	6.23014	0	1.33895	5.26471	7.26115	15.2758	8.99464	6.74368	848.621	12.7467	2.91714	5.02378	1.31829	0.672016	low
TCGA-BP-4329	2.31507	1	1.08866	4.59892	3.49126	15.6671	6.912	9.61354	209.708	10.2773	1.23032	4.14481	0.811216	0.885068	low
TCGA-B8-5553	1.19178	0	0.990601	4.25698	8.60449	30.0186	6.8527	2.53794	449.1	15.0932	1.15259	5.58991	1.52631	0.71435	low
TCGA-AK-3431	5.07671	0	1.30304	3.10869	5.60293	13.2586	6.09556	15.877	133.572	13.7543	2.44724	5.39019	1.37164	1.79199	high
TCGA-B0-4844	0.857534	1	3.61283	2.06527	7.34266	3.76535	9.85721	1.78495	107.754	7.97108	2.83255	7.75071	1.06164	2.89337	high
TCGA-DV-5575	2.75616	0	1.13684	3.91766	7.36997	23.6054	5.74384	4.48433	140.87	15.8031	1.28275	5.18451	1.30279	0.894114	low
TCGA-A3-3351	2.49315	0	2.03902	5.5463	6.87726	28.4468	9.03226	5.70904	118.687	12.4304	0.541904	6.78384	1.38585	1.07124	low
TCGA-B2-4101	0.515068	0	1.86126	3.94913	4.98955	13.843	10.1575	8.9814	434.023	13.9228	1.61873	6.07694	1.44927	1.19382	high
TCGA-A3-3365	2.39178	0	1.46009	4.60513	3.95609	18.2886	4.97176	13.3782	120.218	21.052	4.67574	4.27206	1.20838	0.831294	low
TCGA-BP-5201	2.60548	0	1.31251	2.83594	7.20978	14.7643	11.8646	2.87033	55.556	20.2391	1.35791	7.58539	1.10866	1.03838	low
TCGA-B0-5701	4.74521	0	1.06833	2.60437	8.79003	12.5414	8.19398	1.77194	505.867	11.7945	0.143623	4.5128	1.26832	1.07855	low
TCGA-BP-4351	2.65753	0	2.01306	2.25222	6.80862	11.5871	10.4434	8.38334	756.209	13.1827	2.35378	7.57821	1.22119	1.40746	high
TCGA-B0-5083	2.86301	1	0.630519	5.12545	3.69353	7.05443	5.27659	8.82605	77.7825	7.45703	1.3554	5.35446	1.36235	1.05185	low
TCGA-CJ-4869	6.99726	0	1.24576	2.15504	7.95943	12.0722	12.4648	4.45563	31.0133	14.6842	0.830849	7.80956	1.39944	1.73748	high
TCGA-B0-4694	0.290411	1	1.45974	2.7596	5.77008	13.328	6.11973	5.18237	84.2012	10.9617	2.32076	2.95725	1.27388	1.36821	high
TCGA-B8-5546	1.38356	0	1.50157	4.22178	6.40987	11.3888	17.0578	1.18752	130.449	12.2908	3.53537	5.53063	1.14556	1.05582	low
TCGA-B4-5836	0.386301	0	1.62351	4.16376	6.40138	14.2873	9.61512	6.97384	714.911	17.7418	5.81551	4.55299	1.12739	0.679562	low
TCGA-B0-5110	2.99178	0	1.17371	6.96158	6.6153	21.0265	8.93598	4.48167	45.4263	15.2621	0.460684	4.48733	1.42861	0.659929	low
TCGA-A3-3313	2.0137	1	1.26463	1.80201	11.1148	5.76051	9.58932	2.04725	7.66489	11.5631	8.56298	4.55752	0.922677	1.72152	high
TCGA-B4-5838	0.454795	0	2.11612	2.98543	5.95135	15.3425	9.74924	11.6318	250.274	15.3826	1.63152	3.60199	0.677866	1.42018	high
TCGA-BP-4160	7.89315	0	1.38194	4.73402	3.34849	13.3198	4.28903	3.15402	77.6166	20.3529	2.87776	3.81472	1.07597	0.543907	low
TCGA-BP-4967	0.561644	0	1.71982	4.32316	7.20912	15.2136	5.88493	2.9383	426.102	14.4134	0.542788	5.90112	1.88925	1.00206	low
TCGA-B8-4151	0.767123	0	0.851191	2.61245	4.77635	16.2709	10.3854	2.39426	766.351	16.6165	0.167064	4.61566	0.981519	0.571374	low
TCGA-B0-4823	1.24384	1	1.13418	3.57269	6.42818	12.0392	4.86802	6.05475	47.4275	15.2993	3.0494	3.89117	1.23906	1.04652	low
TCGA-CZ-5463	1.8137	0	1.24799	4.47738	9.35545	32.925	6.5621	1.67235	61.8808	13.3075	0.045118	4.50517	1.08713	0.86201	low
TCGA-BP-4968	4.78356	0	1.54165	2.3422	5.45511	9.33454	6.28764	4.39228	28.5214	16.1596	0.451742	6.04649	1.16798	1.30178	high
TCGA-CZ-4865	0.454795	1	1.33384	3.65808	4.99931	13.5498	10.3335	8.38546	27.2571	14.5503	7.62799	4.94828	1.99141	1.4005	high
TCGA-AK-3450	4.13151	0	1.70951	3.69934	5.55989	11.0486	9.53677	2.61661	665.099	15.3115	0.144454	5.77819	0.958307	0.718604	low
TCGA-CZ-5457	4.23836	0	1.09022	4.25872	5.48389	20.4458	4.16496	4.27519	178.093	11.5832	2.18774	4.44529	0.912951	0.762184	low
TCGA-BP-4159	7.12603	1	1.00174	2.75502	3.31764	9.21605	5.29963	10.416	121.448	11.3587	1.79496	4.6605	0.779894	1.2021	high
TCGA-CZ-5458	4.26849	0	2.07935	3.69085	5.10027	24.5728	6.84783	6.5657	420.688	14.5427	1.53261	5.56178	1.78083	1.11066	low
TCGA-BP-5191	2.64932	0	1.6566	1.56044	4.68482	3.92058	5.83623	1.72915	138.441	4.59322	0.0630021	3.55956	0.363534	1.50323	high
TCGA-BP-4330	5.1726	0	1.15727	5.19357	6.6404	20.5379	7.48919	7.51491	212.342	8.9294	0.345785	6.11547	1.67466	1.17335	low
TCGA-CZ-5456	4.26849	0	1.55176	2.33229	4.45324	7.44905	10.0013	2.76764	51.3053	5.45272	0.127666	5.20244	1.57726	1.96763	high
TCGA-CJ-4903	4.27397	0	1.72605	3.78291	6.73202	17.1027	7.48879	2.54298	221.982	11.11	0.767013	4.49032	1.27404	1.11744	low
TCGA-BP-4789	4.07945	0	0.820429	6.97802	5.91123	27.7089	6.19208	6.94045	46.7808	17.843	5.49071	5.75812	1.00593	0.459437	low
TCGA-B0-5812	8.11781	0	1.05219	5.07351	4.70009	22.2295	6.36165	6.32869	29.2383	17.0649	1.99633	3.99928	1.17108	0.679987	low
TCGA-CJ-4904	4.90959	0	1.00813	4.73067	6.7317	32.8921	9.41057	7.88075	463.305	15.7155	5.75862	4.56575	1.06559	0.610404	low
TCGA-A3-3331	3.44384	0	1.17123	4.54613	4.82557	17.1404	9.88038	3.5668	168.966	14.7848	1.50038	5.77422	1.0404	0.737069	low
TCGA-A3-3362	4.27123	0	1.11975	4.04869	6.71886	15.8794	7.54599	4.19783	128.939	14.5413	6.54243	6.61051	1.15458	0.870841	low
TCGA-BP-4782	0.969863	0	1.18976	2.95542	6.40311	13.544	10.1249	4.64902	205.982	15.8819	0.773456	5.33479	1.50777	1.1662	low
TCGA-B0-5713	5.10959	0	0.946231	4.42185	5.49446	15.2374	10.8174	3.92959	314.247	16.2848	1.75303	4.79806	1.30162	0.70589	low
TCGA-AK-3465	1.01096	0	0.476111	6.11621	4.17977	10.1396	5.70789	4.69603	42.1033	14.0327	0.739474	7.94886	1.56814	0.663191	low
TCGA-A3-3383	2.3589	0	2.4162	0.606999	5.17753	13.2109	8.07405	1.7941	116.756	9.21724	0.680245	8.08285	1.57908	2.47802	high
TCGA-BP-4763	3.47945	1	1.0547	5.32775	2.09576	16.4294	3.24362	7.83498	125.591	16.1885	1.06229	2.78328	0.763708	0.533229	low
TCGA-AK-3451	4.05753	0	1.5532	1.29333	2.24108	4.08505	6.28433	4.80047	67.2735	10.0656	0.518086	3.48388	0.452561	1.33057	high
TCGA-CZ-5464	4.08767	0	1.35304	3.01647	4.76933	7.56461	7.9273	3.38272	63.2004	10.5657	0.885861	5.44238	1.44682	1.37075	high
TCGA-BP-5190	2.76986	0	2.16794	2.47609	5.35359	9.61703	9.54656	2.23936	366.371	10.88	0.440176	4.09157	0.980798	1.28478	high
TCGA-BP-4758	6.04932	0	1.1208	3.05845	5.38897	10.5392	6.56004	3.17827	19.7372	9.06	0.196104	6.04503	0.891653	1.21805	high
TCGA-BP-4331	6.72329	1	2.0486	5.22129	9.11211	15.5366	10.9635	4.95782	66.5061	18.7901	0.568507	7.89168	2.06722	1.38279	high
TCGA-B0-4824	4.53973	1	1.58713	4.10879	7.99864	12.0432	11.5189	4.31608	65.1715	14.9952	2.10466	6.22381	1.45104	1.31034	high
TCGA-BP-4756	1.02466	0	1.32255	2.78693	6.98885	4.31477	11.1368	0.620826	7.60074	12.2153	1.00804	4.81407	1.04824	1.32616	high
TCGA-BP-4801	3.07945	0	1.44435	4.21589	5.73732	17.1351	7.75601	4.96762	31.4728	15.3408	6.85067	4.5899	1.45763	0.958365	low
TCGA-B8-A54I	0.410959	0	1.88478	1.45608	8.70676	4.45516	9.33821	1.72051	84.9069	4.84481	0.195052	7.92158	1.31954	2.85853	high
TCGA-CJ-4884	4.81918	0	1.50351	2.61164	5.3707	9.25307	16.475	4.37775	56.4311	16.3886	0.973406	7.02509	1.41338	1.4836	high
TCGA-CJ-5671	5.32329	0	1.97355	2.70188	7.44427	7.39716	8.79569	8.75717	47.8743	12.3341	0.59105	6.39808	1.5426	2.3766	high
TCGA-CZ-4862	5.04932	0	2.44832	4.68455	7.19761	20.9483	9.0641	4.54112	51.0881	20.0015	0.632045	6.98406	1.91154	1.24426	high
TCGA-B0-4693	0.210959	1	1.24681	4.16045	6.17584	14.665	9.08382	2.9401	79.5082	12.7635	0.454212	5.01258	1.31344	1.02206	low
TCGA-B0-5084	0.608219	1	4.358	1.55065	13.5683	14.6621	19.7148	0.733131	9.36581	12.31	0.141256	3.54868	0.989732	4.57181	high
TCGA-BP-5200	2.91233	0	1.35003	3.78611	6.44488	10.8832	8.06902	5.44702	140.07	18.4229	0.467226	5.66136	1.17625	0.969709	low
TCGA-B0-5700	2.96438	0	0.74896	2.15678	6.41384	9.46221	7.71945	2.0044	54.1666	10.7257	1.65911	6.93544	1.28329	1.33136	high
TCGA-B8-A54E	2.49041	0	1.70908	2.15217	5.69908	1.34542	9.09017	0.73723	15.4571	8.35757	0.0171675	4.00861	1.13299	1.73285	high
TCGA-BP-5175	2.55342	0	1.36154	1.45236	6.36153	2.53239	7.93115	2.78634	33.1786	5.72247	0.582926	4.42718	0.81034	1.95114	high
TCGA-B8-A54F	1.42192	0	2.18413	4.43582	7.2986	18.9153	6.51281	6.19977	646.594	14.7545	4.20589	5.52658	1.68267	0.959027	low
TCGA-B0-4843	0.876712	1	1.57829	2.02481	8.68435	3.51095	5.93569	12.6128	5.19863	7.65675	1.81051	6.32915	0.79858	2.94102	high
TCGA-B2-5641	0.887671	0	1.27107	4.13003	8.04649	12.3964	6.78797	2.57035	30.9309	12.6109	0.512432	4.70331	1.64866	1.24163	high
TCGA-BP-4981	3.00548	1	0.808426	1.89926	6.74363	13.1545	8.94811	2.55483	111.524	9.17799	0.322203	6.79387	0.871788	1.35134	high
TCGA-BP-4161	7.52329	0	2.24644	3.83288	6.98506	18.103	9.41989	2.0097	40.5101	11.436	0.633379	6.18257	1.15881	1.37896	high
TCGA-B0-4839	4.49041	1	1.01496	1.80578	6.00904	7.78507	4.86289	6.04133	36.221	8.53509	0.133734	6.48771	0.728263	1.61652	high
TCGA-B0-4818	1.39726	1	1.05177	3.84495	6.10761	16.2103	8.33984	4.30899	261.11	19.6927	1.17055	10.6871	1.41082	0.807848	low
TCGA-B0-4816	3.75616	1	1.54257	3.4353	6.44905	18.1994	6.7437	3.56562	110.59	20.5165	6.36453	8.07531	1.61776	0.916004	low
TCGA-B0-4817	2.79178	1	2.44928	1.86248	2.71964	5.65348	12.1184	0.553188	26.2841	9.69383	0.580485	6.32589	0.858515	1.64484	high
TCGA-B0-5097	1.82192	0	2.39079	2.70288	8.39402	4.45279	10.7852	17.2266	294.84	10.494	0.709556	3.98543	1.32315	3.46157	high
TCGA-EU-5906	0.564384	0	1.14446	5.2984	5.30832	20.5779	7.09419	2.55978	267.737	20.2401	2.26759	4.34143	1.29071	0.48647	low
TCGA-B0-4703	0.49863	1	1.75527	3.29922	6.41284	4.94223	11.0218	12.6927	22.5421	21.929	0.267981	4.90306	1.60287	1.75076	high
TCGA-B0-5690	6.59726	0	1.05284	4.52918	6.95536	14.7316	8.18187	10.2285	42.8757	19.5732	0.400228	6.42158	1.54466	1.11515	low
TCGA-A3-3373	4.4411	0	1.40639	5.5595	4.80888	30.2782	9.65073	6.56333	964.057	16.4172	1.19793	4.50648	1.06726	0.400011	low
TCGA-B0-5098	4.33973	1	4.48562	1.60876	22.7323	3.63128	21.7134	0.477467	5.05706	18.3225	0.066711	3.50197	1.19089	7.21226	high
TCGA-CJ-4897	4.95342	0	0.639522	4.63833	3.38085	19.651	7.49236	4.21445	169.804	10.7327	1.02178	4.66039	1.0683	0.671357	low
TCGA-EU-5907	0.347945	0	2.24565	3.51836	7.58485	13.7851	7.54801	1.44494	45.5986	12.7804	0.943779	4.89066	1.24116	1.39507	high
TCGA-B8-5550	1.18904	0	1.141	3.01387	8.14582	5.32439	7.71989	12.1743	129.949	12.2965	1.60184	4.71643	1.52067	2.06329	high
TCGA-B0-5096	0.186301	1	3.08473	3.77831	6.38445	3.31853	9.04818	2.76093	18.5101	17.7255	0.156625	3.15276	1.8186	1.73187	high
TCGA-BP-4326	4.45205	1	1.72881	2.26306	7.47737	4.10166	4.14478	8.25975	33.5481	6.2565	1.08475	6.60197	1.20741	2.59471	high
TCGA-BP-5185	3.10137	0	1.38786	1.61718	5.61538	5.36102	6.43978	1.04606	26.8592	4.82476	0.242828	4.34494	0.262287	1.48849	high
TCGA-BP-4999	3.46849	0	0.926431	6.09883	4.23614	15.352	6.09564	7.77023	1271.81	16.8251	7.60075	5.24796	1.14253	0.279099	low
TCGA-BP-4327	0.29863	1	1.08107	3.46866	9.16988	11.5008	6.13062	3.97174	112.69	10.5419	2.94965	7.6812	1.30453	1.38907	high
TCGA-BP-4971	4.07397	0	1.84618	3.52489	8.36617	5.84025	13.8464	11.9132	9.79166	10.9078	3.04766	6.55521	1.52683	2.75878	high
TCGA-AK-3447	3.33425	0	0.151944	1.96818	0.430327	2.6246	1.42934	0.332849	87.2298	6.70603	0.0106575	2.7256	0.780994	0.757553	low
TCGA-BP-4992	1.3726	0	1.78275	3.66433	11.5715	8.7888	10.228	3.0367	105.7	6.32136	1.09625	7.26972	0.981828	2.05583	high
TCGA-CJ-5681	1.51233	1	2.21333	3.03148	5.78035	6.81961	16.8169	2.5592	13.6372	11.4224	2.81881	2.9163	1.35662	1.77389	high
TCGA-CW-5583	6.81918	0	0.702599	6.38493	6.32557	24.0118	8.78137	4.87713	135.742	15.1674	4.14103	4.68651	1.23898	0.544032	low
TCGA-CJ-4874	6.25479	0	1.00128	3.95141	4.15957	16.3989	9.27084	4.79132	331.594	18.0182	0.169053	4.96576	0.942952	0.624194	low
TCGA-B0-4710	0.263014	0	3.75398	2.62228	7.56932	23.3972	8.07277	4.21768	117.532	23.2684	1.23291	8.84996	1.7605	1.83939	high
TCGA-A3-A6NI	2.78904	0	2.94716	3.66749	10.639	16.8267	10.7142	2.45954	31.7746	15.3268	0.143039	8.82479	1.60435	2.14854	high
TCGA-A3-3328	3.79452	0	0.889727	4.42085	6.94417	13.5422	6.12086	0.468093	13.6094	18.4527	0.043933	6.97989	1.80478	0.819647	low
TCGA-CZ-5984	4.08493	0	2.09564	3.62221	6.84608	12.6656	7.05817	1.35272	86.0857	11.9988	0.598726	4.38293	1.11949	1.23889	high
TCGA-A3-3326	3.11507	0	1.43999	4.50635	7.03765	20.6731	12.5699	4.07809	215.23	18.0466	3.33413	5.59671	1.46237	0.856786	low
TCGA-BP-5009	2.99178	1	2.16721	3.57919	6.8866	8.89123	7.28417	4.74454	8.15765	12.7308	0.436962	5.11488	1.07474	1.53893	high
TCGA-BP-4970	1.1863	0	0.99042	4.53632	6.08678	20.7373	7.81136	6.33649	28.4687	15.7444	1.19192	4.66181	1.63594	0.969925	low
TCGA-CJ-4873	4.86575	0	1.73571	2.21109	8.17549	4.52549	9.62945	3.39442	9.51332	9.31118	0.312641	6.77243	1.07005	2.1319	high
TCGA-B8-4148	1.03836	0	1.26833	5.32442	8.80911	17.9527	11.8713	3.6802	554.594	16.0351	8.37348	7.53294	1.7462	0.721056	low
TCGA-CW-5584	0.449315	1	1.83635	2.14848	7.02305	23.7076	8.40927	5.24074	91.7652	16.2698	0.66405	6.70577	1.59051	1.59264	high
TCGA-B0-4852	3.07123	1	2.91105	3.01294	4.05898	26.001	6.94806	4.16881	336.466	18.3662	0.817945	4.49941	0.845492	0.9072	low
TCGA-GK-A6C7	0.167123	0	1.82544	4.64299	7.14901	11.583	7.65216	7.13479	105.959	22.0751	5.11328	7.4581	1.73505	1.03474	low
TCGA-B8-4146	1.4	0	2.86363	4.03933	1.44407	24.0584	1.51987	3.11862	943.042	14.1586	0.0587146	0.804016	0.134442	0.396362	low
TCGA-CJ-5680	2.10411	1	1.23244	3.91962	8.56081	18.2605	13.8064	3.2465	60.1119	19.9941	7.086	5.95692	1.1976	0.88327	low
TCGA-B2-5636	0.726027	0	0.742213	7.37242	7.1105	20.5823	5.93288	9.41436	53.371	15.8747	3.09227	7.16319	1.66541	0.703375	low
TCGA-BP-4775	5.04932	0	1.53769	5.9742	6.18919	21.9757	7.08941	2.29061	381.262	20.6623	0.0924117	5.91103	1.58147	0.514585	low
TCGA-B0-4688	0.276712	1	5.43465	4.65072	20.6552	1.16594	3.3452	37.0647	2.75828	24.4235	2.20678	5.45244	3.41782	25.4993	high
TCGA-A3-3346	0.375342	1	5.12682	2.1453	6.72643	1.37223	6.21487	6.99371	31.6346	8.3283	1.80215	6.69249	1.7441	5.72413	high
TCGA-A3-3374	3.6	0	0.468868	6.40263	4.90751	9.04496	10.2746	1.0586	234.924	6.59248	0.0519504	4.57825	1.40486	0.659752	low
TCGA-BP-4995	3.75616	0	0.740689	5.75268	4.07765	24.4884	6.16622	2.28647	35.6421	15.8001	0.459135	4.78772	1.37383	0.521287	low
TCGA-BP-5189	2.25205	1	1.31178	3.56065	5.81136	20.4898	6.57228	4.83263	605.02	14.1628	1.4673	4.89264	1.1026	0.721374	low
TCGA-A3-3347	4.41096	1	2.16486	3.90368	7.96788	6.63589	11.0126	12.3763	456.108	12.3849	1.24368	5.56126	1.69761	2.05973	high
TCGA-BP-5182	3.19178	0	1.13899	4.05935	5.90024	8.26435	8.84413	9.69478	45.0543	15.5533	3.54517	4.68925	1.37493	1.2345	high
TCGA-BP-4790	3.04384	1	1.07994	3.64933	5.55037	20.2193	8.53051	6.66993	41.8603	14.4404	2.58733	7.02639	1.0037	1.00835	low
TCGA-B0-5691	9.4	0	0.825906	5.39798	5.71546	15.7017	7.87735	8.26766	332.566	17.492	2.99975	5.00379	1.13093	0.616408	low
TCGA-B2-4099	1.02466	0	2.31148	2.61865	4.38311	10.552	7.19258	3.08589	80.8604	19.565	6.08776	4.95717	1.07891	1.02035	low
TCGA-AK-3427	7.03014	0	0.887563	3.04448	2.20649	1.40734	5.10475	1.35384	14.0895	15.4095	0.031361	3.53622	1.1151	0.783082	low
TCGA-BP-4177	4.57534	0	0.860685	4.31858	9.07331	18.503	7.6222	6.63938	113.678	13.5437	1.97975	4.54096	1.12384	1.04809	low
TCGA-BP-4347	3.74521	0	1.44122	5.64094	10.7205	13.4946	9.26251	3.76986	296.935	10.4151	2.2645	6.84931	1.18511	1.06137	low
TCGA-BP-4346	4.09041	1	1.88226	3.7214	7.36581	12.7709	12.8246	4.24275	17.3767	14.6803	1.37387	8.6594	1.93692	1.77012	high
TCGA-BP-4176	5.35616	0	2.14633	3.30763	4.62186	17.5777	7.24176	4.05244	365.41	11.8038	0.564284	3.91309	1.1928	1.08574	low
TCGA-AK-3426	2.42466	1	3.30004	2.40576	6.63815	7.07019	8.98807	9.2457	44.1222	7.72447	0.435898	5.94808	0.948228	3.32891	high
TCGA-AK-3428	6.09041	0	0.50874	5.07069	4.43678	24.563	7.44378	3.53971	402.126	9.94261	5.45632	3.73268	1.83657	0.611563	low
TCGA-AK-3433	6.00548	0	0.481518	5.25972	3.58276	20.59	8.43942	0.978039	45.4693	6.89264	0.0478064	6.64564	1.29179	0.714299	low
TCGA-BP-4759	6.49863	0	1.05029	1.62332	4.73764	11.8663	7.12177	7.84171	312.614	8.1112	0.44091	5.69634	0.878644	1.48495	high
TCGA-B2-3924	1.01644	0	1.34536	6.83894	6.78222	22.2319	4.52476	2.40465	1169.15	8.9033	1.33277	3.34829	0.711177	0.316469	low
TCGA-B8-5545	1.43014	0	1.48907	4.22626	6.41907	17.1784	8.93244	9.95608	18.8115	17.5168	0.873751	5.53353	1.50876	1.30105	high
TCGA-BP-4164	2.71781	1	0.956029	3.13903	8.97487	19.6315	8.12299	3.02821	502.86	16.6524	0.0368592	6.08466	1.25411	0.838988	low
TCGA-B0-4690	0.117808	1	3.20167	2.35859	9.08277	5.321	7.12484	11.0067	12.7856	15.4273	0.352196	3.99562	1.75761	3.68125	high
TCGA-A3-A6NJ	1.28219	0	1.12061	4.0323	9.3535	16.0545	11.7145	4.32835	79.4543	16.2189	3.00974	8.54064	1.92029	1.35499	high
TCGA-B0-5703	3.29589	0	1.2659	2.54057	6.90269	18.2048	7.66445	3.49651	214.728	7.55088	0.657477	5.95186	1.06296	1.39062	high
TCGA-BP-4353	1.0274	1	1.44682	4.19209	4.03374	13.0013	3.28807	14.4208	1222.89	16.7049	1.10868	3.45844	1.19065	0.592312	low
TCGA-B0-5081	0.991781	1	3.18686	2.61831	7.34171	7.24468	11.8763	7.38955	136.131	15.8763	0.389202	6.83185	1.58525	2.64734	high
TCGA-A3-3367	6.21918	0	1.59842	1.72038	5.55388	21.254	7.52176	3.08293	562.268	9.5726	10.2241	4.21127	1.25928	1.02442	low
TCGA-BP-4787	1.31507	1	1.74524	1.97227	4.15454	5.84716	6.65545	5.17926	271.675	6.72928	1.16439	4.84067	1.22392	1.71382	high
TCGA-CJ-4881	5.51781	0	2.97285	2.24276	5.25656	5.36356	11.8712	6.20653	10.4499	5.71531	0.345544	7.38702	1.15109	3.21724	high
TCGA-DV-5576	1.99178	1	0.66507	5.5968	7.95263	14.9676	8.99805	4.60532	61.3497	14.7229	2.74002	6.24838	1.14608	0.758664	low
TCGA-A3-3311	3.26301	1	2.41258	3.62224	6.95507	17.4775	10.5198	3.1542	46.4075	13.0868	0.45384	4.97128	1.27744	1.50666	high
TCGA-G6-A5PC	0.663014	1	1.0845	1.00639	5.63195	8.5103	13.988	1.19818	20.5773	6.02983	0.588654	8.57379	0.249041	1.66936	high
TCGA-BP-4804	3.99726	0	1.72807	3.34446	5.41113	7.16452	9.92564	9.94497	92.3259	14.2159	1.38562	6.74134	1.65443	1.82455	high
TCGA-B8-4153	1.10959	0	1.07518	2.05439	5.49192	15.8147	7.66389	4.12193	52.7325	10.5804	7.31727	6.69185	0.937612	1.21921	high
TCGA-BP-4334	1.76712	1	0.413597	2.45664	4.30231	14.3633	13.7314	0.668601	2.87281	2.95509	0.0801855	9.12184	0.849521	1.33847	high
TCGA-B0-4821	3.36986	1	2.94426	2.03286	12.0571	2.00063	23.77	3.62063	70.0621	3.7855	0.147693	7.69514	0.796026	4.92713	high
TCGA-CZ-4853	2.12055	0	0.867507	3.43343	3.69407	26.9873	9.17852	0.917185	75.6235	14.2781	2.63796	4.59483	1.11762	0.66699	low
TCGA-CZ-5461	0.90411	1	1.29842	3.61541	5.85481	19.1996	7.55761	3.11175	67.6615	10.9876	0.669038	6.28802	1.37052	1.15503	low
TCGA-B0-5710	3.99726	0	1.09875	4.37393	4.85401	17.9973	6.22825	11.1242	343.049	15.9027	3.37961	4.99758	1.25528	0.846955	low
TCGA-A3-3380	1.55342	0	0.951312	5.08992	5.90838	13.4988	5.13002	7.48015	997.172	14.9208	0.348159	4.94853	1.03465	0.476058	low
TCGA-BP-4760	6.46849	0	0.885394	6.16743	5.86485	15.3529	8.77703	9.62091	91.6884	15.5628	2.51815	4.64126	1.32554	0.784879	low
TCGA-T7-A92I	0.975342	0	2.15523	4.31075	7.00643	9.4986	12.9324	0.469936	69.8935	13.504	9.36633	7.24842	2.32427	1.45601	high
TCGA-CZ-5455	1.53699	1	1.60463	4.43181	5.94896	22.6987	8.61557	4.753	266.229	15.79	0.473643	4.07477	1.42018	0.863002	low
TCGA-AK-3454	2.39452	0	2.26707	3.00511	7.08467	5.49447	10.903	7.40683	18.7326	7.30433	0.398887	8.13043	0.997826	2.56108	high
TCGA-BP-4965	5.12603	0	1.3445	4.98244	5.08851	21.7264	8.7831	6.93388	83.5281	16.8554	2.92151	4.59444	1.24322	0.790216	low
TCGA-CZ-4866	4.84384	0	1.03874	3.94456	4.9311	5.94994	8.57018	1.30224	207.103	13.1591	19.4116	4.59577	1.46301	0.675609	low
TCGA-CJ-4901	3.9726	0	2.05615	2.53892	8.25947	9.31091	9.32852	4.16551	32.2907	11.4769	0.414121	6.07992	1.24941	2.05492	high
TCGA-BP-5194	1.11781	0	1.14631	4.95471	4.43526	22.7589	6.87685	6.92313	228.069	15.6747	1.27059	4.00205	0.983459	0.644877	low
TCGA-B4-5832	0.424658	0	3.73947	2.49803	0.686675	8.37592	1.99558	17.998	1418.97	9.59171	0.338484	0.45719	0.0877806	1.05977	low
TCGA-CZ-5460	3.91781	0	1.24488	1.22774	7.10263	20.9985	8.6436	1.61859	131.908	7.62225	0.574641	7.99182	1.12201	1.70013	high
TCGA-B0-5711	8.03014	0	1.40284	4.54766	4.7463	22.0916	7.9676	6.16352	52.7648	15.8912	3.75485	4.46837	1.2154	0.826277	low
TCGA-BP-4761	0.49863	0	2.79804	0.8121	10.0061	5.14079	15.6034	1.08344	5.41797	8.94507	0.0775721	6.70168	0.666543	3.31601	high
TCGA-CJ-4868	1.76986	1	1.87038	2.74887	7.93891	7.58712	10.2628	11.386	46.8939	12.2864	1.12503	6.12586	1.80683	2.84864	high
TCGA-B8-5549	0.531507	0	1.00235	4.52249	6.1395	18.9199	4.08116	3.87079	157.791	11.815	0.198853	3.19795	1.14258	0.797005	low
TCGA-AK-3453	3.8274	0	3.02752	1.53132	7.85885	10.3942	10.9932	1.88447	26.8487	9.53841	0.346602	8.31035	1.14416	2.88678	high
TCGA-CZ-4854	3.84658	1	1.79164	3.88782	7.67661	7.27305	10.6082	3.7543	17.7168	8.93467	0.334065	6.59622	1.56432	1.88569	high
TCGA-B0-5100	5.2411	1	1.11137	4.42421	6.47896	6.76336	9.99722	8.88051	8.43972	13.0068	3.52781	8.20092	0.438204	1.10319	low
TCGA-CJ-4634	4.9863	0	1.36423	5.27713	6.58035	26.0172	8.6549	7.74382	186.444	16.3008	1.59948	6.59569	1.273	0.830822	low
TCGA-B8-4154	0.69863	0	1.30019	3.87008	2.5293	9.37742	5.82113	3.68315	250.63	16.4385	0.531997	3.59976	0.630705	0.597186	low
TCGA-CJ-4900	4.69589	1	2.41935	2.14759	9.12263	10.7551	14.0703	4.60639	14.4229	14.782	0.630712	7.37881	1.09527	2.33027	high
TCGA-BP-4803	0.558904	0	1.528	3.98631	3.94925	19.0198	4.00165	3.22187	143.874	12.5706	2.13158	4.13138	1.04393	0.790043	low
TCGA-BP-5178	5.23836	1	2.55586	1.06929	6.84881	4.08772	10.4525	2.84136	482.59	7.80502	0.0885627	3.2699	1.61889	2.45907	high
TCGA-CZ-5459	4.15068	0	2.17447	1.20121	7.00767	17.3298	4.84426	1.14273	54.7049	14.8314	0.377288	6.59202	1.06862	1.57691	high
TCGA-CZ-5452	4.26301	0	1.20845	2.28485	7.65801	12.7594	9.22115	1.01838	60.5532	14.6223	4.31044	7.8482	1.46442	1.30922	high
TCGA-BP-5176	4.35616	1	1.12222	3.15088	7.33544	10.4897	11.5379	4.93334	143.841	17.2623	9.13538	5.88593	1.26005	1.02993	low
TCGA-B0-4691	0.380822	1	1.78805	1.8462	5.71575	8.61837	10.9631	3.85158	8.51988	13.2215	0.304377	4.84378	1.19568	1.7579	high
TCGA-BP-5177	0.80274	0	0.787207	2.95665	6.63919	7.44894	9.63844	9.47382	42.1783	11.0748	1.1287	5.71887	1.20515	1.65969	high
TCGA-BP-4354	2.83288	1	4.09258	2.9302	8.77644	10.5899	13.6081	10.7854	85.3284	16.4321	0.0526007	3.73573	1.71553	3.87679	high
TCGA-CJ-6032	6.98082	0	0.8867	4.3417	5.70101	7.80915	7.9141	3.39045	237.761	10.9219	0.738026	4.36541	1.07516	0.85594	low
TCGA-BP-4158	9.25205	0	1.20557	4.13335	5.76874	15.9498	8.07571	5.44987	234.605	15.9269	2.51516	5.28503	1.27616	0.847653	low
TCGA-BP-4969	4.91507	0	0.646944	3.82615	6.76223	7.03681	5.38348	2.44034	346.322	10.2481	0.215402	7.18785	0.962937	0.843341	low
TCGA-B0-5080	0.936986	1	1.27419	3.94706	6.04611	14.413	8.74482	11.0804	9.66235	17.1425	2.16929	6.59633	2.22646	1.63989	high
TCGA-B8-A54G	0.145205	0	2.00285	2.71213	7.0732	17.417	15.6078	1.15894	36.265	20.405	0.814792	7.67695	2.15219	1.55348	high
TCGA-BP-4962	4.89041	0	1.03101	2.16391	4.43861	9.65106	8.71391	4.91455	43.3007	13.3919	2.73233	4.6842	1.02452	1.19414	high
TCGA-B0-4841	0.558904	1	0.580252	2.00012	3.28544	7.93339	4.68298	4.54463	42.5986	6.92614	0.436542	4.56178	0.550433	1.13047	low
TCGA-BP-4983	3.87123	0	2.64512	1.81632	10.961	2.42786	15.8289	25.0374	9.2434	28.2156	0.117762	4.81023	1.41191	4.72706	high
TCGA-AK-3434	5.71781	0	0.659743	2.57621	4.11299	24.9715	5.612	11.0847	724.28	11.2543	5.80611	4.87631	1.03474	0.773494	low
TCGA-B0-5113	0.983562	0	1.51955	5.23419	5.49346	24.3735	8.62356	4.13381	67.093	7.84593	1.54245	5.30451	1.25666	1.01292	low
TCGA-B2-3923	0.991781	0	0.30169	5.72971	4.02567	11.4499	4.06359	1.52413	18.573	13.0884	0.412177	7.50957	1.57572	0.596532	low
TCGA-BP-4163	7.77808	0	1.69928	3.56492	6.86443	19.8154	8.61183	3.3907	34.3427	15.8114	3.96121	5.44409	1.20856	1.06992	low
TCGA-B8-A54H	0.70137	0	1.02077	3.4192	10.2884	13.6253	8.17957	4.81843	41.9903	12.6633	0.568296	7.88941	1.29533	1.53659	high
TCGA-CZ-5988	1.89863	0	2.03961	3.56225	5.78822	8.64672	4.53648	11.7011	283.929	19.6991	0.712447	2.51169	1.71705	1.36248	high
TCGA-A3-3324	3.24932	0	3.14963	5.22991	6.54282	16.6562	7.34159	4.88663	36.8851	11.2563	1.00221	5.39857	0.982013	1.41315	high
TCGA-CZ-5986	1.02192	0	1.07446	4.76725	3.92348	37.1924	6.74696	3.28751	94.0868	17.4977	9.21295	2.97611	1.16021	0.456147	low
TCGA-CW-6090	6.99178	0	2.20797	1.90909	4.82293	14.2544	4.5632	6.88584	48.6472	6.41534	0.553234	3.52392	1.23293	2.22781	high
TCGA-B8-4143	1.94247	1	2.89558	3.43453	9.54857	21.1745	11.2072	8.99657	43.4391	12.0125	0.130425	6.88293	1.53502	2.82902	high
TCGA-B0-5077	3.60822	1	1.18356	2.08393	7.17082	11.2325	7.38575	2.36425	13.0769	18.9265	0.620184	6.0509	1.14001	1.14093	low
TCGA-CJ-4878	5.98904	0	1.9532	2.89675	13.1667	38.3751	11.203	2.57181	302.191	22.3819	0.32955	7.44845	1.19925	1.10741	low
TCGA-CZ-5987	1.21918	1	2.855	2.45908	6.21795	14.7488	9.41415	1.1403	222.628	13.788	1.67546	4.76919	1.17159	1.47328	high
TCGA-BP-4799	3.10411	1	0.553577	1.30443	2.89314	2.29655	6.5178	10.5779	26.6402	4.84541	0.367952	2.00837	0.204641	1.6166	high
TCGA-BP-4771	0.443836	1	1.6296	2.95608	9.59184	9.24222	11.3802	6.49082	31.581	12.016	0.534041	8.07541	1.95694	2.56476	high
TCGA-CJ-4876	5.35616	0	1.88863	2.70128	6.48024	29.8674	11.1661	3.33144	38.5305	11.4862	0.170438	10.8406	1.05631	1.50025	high
TCGA-3Z-A93Z	1.05479	0	1.77516	3.2099	6.50987	13.8203	8.28295	6.41813	421.536	8.91583	1.30019	8.69985	1.319	1.50223	high
TCGA-BP-5180	6.2	0	2.93252	3.07514	5.26967	12.878	4.8093	0.762192	190.362	16.0844	2.70436	5.28626	1.03868	1.09943	low
TCGA-B2-5633	0.980822	0	2.1681	5.23929	5.99872	33.8809	5.12185	4.25535	368.074	11.6464	1.61844	4.80956	1.32714	0.790488	low
TCGA-B0-5121	1.51781	0	1.01319	2.40245	4.85013	10.0993	5.78467	3.71531	118.857	10.1568	1.71139	4.68874	0.859749	1.11713	low
TCGA-A3-A8OV	0.931507	0	1.49488	3.63433	8.89118	10.4506	7.01805	1.60822	137.729	20.3437	5.55885	8.34202	1.52215	0.968698	low
TCGA-B0-5094	0.912329	1	2.55233	3.24691	7.66059	7.66372	8.10036	2.00001	21.673	4.83436	0.455128	5.40165	0.998561	2.16628	high
TCGA-BP-5168	4.00822	1	1.07894	3.58373	5.46845	18.2205	7.56679	4.65863	49.9735	13.0458	0.685465	5.33253	1.04321	0.992929	low
TCGA-B0-5695	3.89041	0	1.11933	3.48016	5.1494	20.6104	7.59165	4.10578	265.975	14.6275	6.37437	5.28816	1.23925	0.773642	low
TCGA-A3-3343	2.58904	0	1.09179	4.20757	5.7711	23.8663	8.77787	2.28545	882.478	11.6735	0.57141	6.09435	1.23	0.554913	low
TCGA-CJ-4894	2.30411	1	2.27272	5.66451	7.51818	34.6942	13.8706	4.44352	18.5805	17.759	1.43925	7.21255	1.65131	1.03457	low
TCGA-EU-5904	1.50959	0	0.50955	4.24713	4.91931	26.3873	5.16363	3.21234	890.579	14.2119	0.495289	4.67351	1.07286	0.385065	low
TCGA-CJ-5682	5.1589	0	1.12564	3.09678	6.52007	17.373	12.0197	5.75349	101.309	18.2006	1.87491	6.89378	1.07189	1.04196	low
TCGA-BP-4991	3.87123	0	1.86346	6.21643	5.37404	25.0762	6.48574	9.68623	121.911	16.5791	11.129	5.36482	1.4423	0.742354	low
TCGA-BP-4972	4.11507	0	1.02751	4.7286	4.20284	14.2798	7.23489	4.67136	19.1706	15.1103	0.461097	4.24117	1.23171	0.781615	low
TCGA-B0-4814	0.460274	1	1.50137	1.67108	4.85628	21.7341	6.04215	3.00011	117.778	12.1953	3.21454	6.14613	1.17478	1.24098	high
TCGA-CJ-4644	0.920548	1	1.28955	3.97276	3.89552	9.57206	8.36269	5.97982	350.809	14.8058	2.15862	5.49675	1.06778	0.801135	low
TCGA-BP-5000	1.54247	0	1.25392	2.36768	5.04727	10.3142	7.67123	3.17099	38.5631	10.3539	1.65357	5.04936	0.806142	1.23989	high
TCGA-BP-4343	5.23836	1	1.06132	3.5163	1.9831	8.45008	4.82172	12.7488	106.884	10.9893	0.748632	2.84564	1.22963	1.26605	high
TCGA-BP-4173	5.1863	0	1.22859	2.81291	8.21639	9.60103	10.4918	4.15118	16.2296	16.0429	2.45521	6.72242	1.96555	1.66712	high
TCGA-CJ-4643	4.91233	0	1.0643	5.29895	7.24426	21.3867	10.3976	9.31348	667.956	13.4439	3.05453	6.183	1.42698	0.76683	low
TCGA-BP-4174	5.14795	0	3.26501	2.23185	5.39247	9.91737	9.42832	2.96312	17.506	14.2773	0.284374	4.77328	1.17716	2.02601	high
TCGA-B0-5399	1.7863	0	1.92156	1.85699	7.0218	16.9438	11.7339	6.10893	24.1302	16.6693	6.10969	5.87117	1.39179	1.73326	high
TCGA-BP-4795	1.69863	0	0.858235	4.18647	5.6624	7.40699	6.83494	9.14784	15.914	17.2566	4.52594	5.95043	1.38868	1.03519	low
TCGA-BP-4344	4.56438	0	1.33113	6.05895	4.62029	18.6601	7.60824	14.6299	201.432	18.7768	4.71813	5.95115	1.30872	0.796974	low
TCGA-B0-4712	3.66301	1	2.09627	2.17504	3.95688	2.6094	7.72701	4.9173	4.41883	8.00453	0.481981	4.53495	1.59445	2.26545	high
TCGA-CJ-4893	2.05479	0	0.838797	3.63689	5.81522	14.0694	8.76563	4.17924	83.8014	15.1035	0.176736	5.52135	1.24729	0.947955	low
TCGA-DV-5567	2.49315	0	0.778375	6.48402	6.73069	19.2677	7.59068	1.99342	55.5961	14.9459	1.97801	5.61155	1.07627	0.534681	low
TCGA-B0-4706	0.178082	1	2.04464	2.09345	5.31265	14.5827	15.0925	11.0485	100.545	12.0535	1.42071	9.92657	1.04419	2.38333	high
TCGA-B0-4707	1.64384	1	1.20337	2.12836	4.59897	8.4916	15.2402	5.3327	134.405	6.13026	0.518193	4.97167	1.58519	2.06834	high
TCGA-BP-5001	3.22466	0	1.01475	2.85359	6.10114	4.97626	14.2015	2.59393	93.1334	9.63419	0.270051	5.91939	0.664983	1.27596	high
TCGA-A3-3378	1.72603	0	3.19867	2.83665	6.78924	8.62587	9.09733	2.346	86.0527	15.0239	10.7565	6.13629	1.50802	1.7212	high
TCGA-DV-5566	3.83014	0	1.17516	1.84062	7.81342	11.6272	10.3243	2.23458	16.9314	17.7449	0.434821	6.70758	1.28734	1.37732	high
TCGA-DV-5568	1.0137	0	1.4445	2.72684	7.74138	6.72015	7.79103	8.74714	27.3321	11.8112	1.62954	5.36743	1.09618	1.89867	high
TCGA-A3-3376	4.64658	1	0.956564	6.34924	5.89078	14.236	7.3301	15.9342	47.2859	19.735	3.81363	6.32777	1.39787	0.901073	low
TCGA-AK-3443	3.89863	0	0.169313	5.26808	4.3239	6.12139	4.59885	0.79438	89.47	15.2056	0.0305407	4.44179	1.1211	0.492401	low
TCGA-B8-5552	1.07397	0	1.41638	5.62825	5.87766	14.4224	6.88057	6.51148	54.6497	15.7058	1.99053	4.89423	1.42312	0.870744	low
TCGA-BP-4770	0.90137	1	2.74888	1.41678	12.0021	2.10061	8.08252	41.4329	2.32726	12.9666	0.633822	3.32522	1.05735	14.7655	high
TCGA-B0-5692	4.07397	0	1.94297	2.83391	8.94463	16.2246	13.8212	1.66198	53.3854	17.6896	0.102665	6.94926	1.66711	1.61737	high
TCGA-B0-5699	7.50959	0	1.20507	1.331	4.51655	25.8061	14.2218	2.34957	131.824	19.2819	0.260144	5.44598	1.48739	1.09076	low
TCGA-BP-5181	4.09589	0	1.19301	3.91095	6.11094	11.9425	7.55352	5.07897	138.705	16.5879	1.25526	4.58353	1.35372	0.954126	low
TCGA-CW-5588	5.52603	0	1.57023	4.54314	4.27927	7.4182	7.60565	7.94778	81.0103	12.3677	1.7173	4.11722	1.29858	1.1718	low
TCGA-A3-3323	3.03014	0	2.00829	4.7813	5.26928	20.1109	5.49779	4.95249	247.517	13.6091	3.71394	4.94295	1.51177	0.920754	low
TCGA-B0-5120	1.35068	0	1.61243	4.69667	5.72158	19.9835	5.71287	7.1255	105.6	18.6287	5.82207	5.08915	1.40274	0.825825	low
TCGA-B8-5158	0.80274	0	3.21836	2.99441	7.62461	6.57395	8.26057	2.26353	18.2409	10.388	2.09934	4.66341	1.29979	2.28579	high
TCGA-CW-5587	6.09863	0	0.960136	4.7358	7.16491	14.2502	9.91512	5.50087	59.4965	12.7648	0.747654	4.47339	1.37638	1.06519	low
TCGA-CJ-4920	0.380822	1	2.1322	2.28375	8.32171	14.56	11.216	4.74679	234.626	11.9097	0.755003	6.64697	1.24618	1.92311	high
TCGA-BP-4975	3.92603	0	1.89243	4.35447	4.35482	17.8152	6.06584	4.27424	79.5154	19.1664	15.1081	4.17759	0.917369	0.597141	low
TCGA-CZ-4864	3.60274	1	2.62608	4.7964	6.3014	26.9369	7.33172	2.7319	131.438	13.621	1.76198	6.07501	1.80352	1.18986	low
TCGA-CJ-4889	5.33151	0	1.50539	4.39326	8.238	16.6361	7.43605	8.51025	34.2614	17.9566	3.23193	6.53534	1.36197	1.19959	high
TCGA-CJ-4882	5.1589	0	2.27672	2.19331	8.44938	4.69662	11.9374	7.81868	13.4971	13.1093	3.10839	8.26966	1.2571	2.71149	high
TCGA-A3-3319	3.09589	0	2.681	2.25987	5.91295	4.78513	12.8974	0.580158	79.3554	7.77485	0.151925	3.47469	0.968511	2.04754	high
TCGA-BP-4960	5.95068	0	2.39816	1.46707	7.22055	6.02483	12.198	5.80816	17.8893	8.45752	0.462827	5.1066	1.23356	3.09559	high
TCGA-AK-3456	3.13151	0	1.52088	3.5198	3.12479	12.457	7.75249	1.63415	6.35925	17.4923	4.35587	5.22628	0.865666	0.717654	low
TCGA-AK-3458	3.2	0	2.14915	2.32447	1.83892	15.5674	3.98707	5.06721	623.722	18.0138	1.49489	3.6919	0.526042	0.626616	low
TCGA-A3-3307	3.93425	0	1.44684	4.29857	5.92648	25.3895	9.61452	6.00678	699.994	21.2913	5.763	5.3166	1.30531	0.516961	low
TCGA-CJ-6030	6.29863	1	2.9446	3.24316	7.43326	18.1903	9.47613	3.52013	64.5045	18.2243	0.319347	4.22348	1.60506	1.62726	high
TCGA-BP-4807	0.578082	0	1.2863	5.09177	4.49228	17.7827	5.13522	2.58489	18.8826	14.7392	1.46189	5.1932	1.38393	0.727158	low
TCGA-CW-5590	2.94521	1	1.25162	3.36772	8.66356	18.0682	9.71364	7.76871	410.956	11.3255	0.629657	6.3653	1.21982	1.35018	high
TCGA-BP-4765	5.98356	0	2.33403	4.5756	5.76747	18.9151	6.01837	9.47886	266.385	18.1009	1.32905	5.43849	1.30912	1.0709	low
TCGA-A3-3385	5.46027	0	1.10445	4.39985	5.29505	18.8635	10.5702	1.5096	1075.96	16.7916	0.284241	3.76806	0.663954	0.342438	low
TCGA-A3-3306	3.06849	0	5.0317	1.93132	7.18278	37.8123	5.55997	1.33145	631.335	19.9111	4.39121	4.24517	0.955139	1.24913	high
TCGA-BP-4338	7.83288	0	1.05061	1.67326	4.27938	0.600846	17.302	0.874015	21.5998	5.81938	0.0385853	3.02512	1.61674	2.04654	high
TCGA-CJ-4902	4.16438	0	1.7042	3.92258	6.47364	12.4887	11.3515	9.46915	43.7023	13.1568	1.3583	6.05172	1.66686	1.80143	high
TCGA-CJ-5678	1.5726	1	2.50022	1.02793	3.5046	13.4942	5.50985	1.63518	32.3148	9.33573	0.216191	5.95001	0.718778	1.7159	high
TCGA-BP-5173	0.169863	1	4.80753	3.41853	10.0839	10.5231	8.00264	3.23459	28.0282	14.3468	1.22705	4.8311	0.922393	2.80935	high
TCGA-BP-4784	5.07945	0	1.11045	5.48078	6.26765	4.06814	6.99074	13.9898	132.796	15.2039	6.15196	7.28603	1.19558	1.11748	low
TCGA-B0-5109	1.60822	1	3.52303	1.67953	17.3308	4.36065	10.3938	4.76068	88.1998	12.9263	1.34586	4.57226	0.820563	4.55975	high
TCGA-BP-4959	7.28767	0	1.07965	3.38633	5.98064	13.3299	8.92184	2.36813	102.651	13.368	3.00215	4.61649	1.93826	1.16439	low
TCGA-DV-5574	1.98082	0	1.18743	3.26136	7.55479	8.70651	3.98501	12.4601	49.8131	18.7305	2.27644	5.01354	1.37191	1.45609	high
TCGA-B0-5102	7.5726	1	1.09605	4.25428	8.14216	11.7931	8.7021	2.02868	38.7206	13.325	0.389422	7.68726	1.30337	1.10055	low
TCGA-CJ-5676	7.05479	0	2.09167	2.64337	6.55707	7.61317	8.99312	4.75479	99.5269	9.13546	1.10661	7.14054	1.08586	1.93522	high
TCGA-CJ-5677	2.14247	1	1.96737	2.37087	5.19795	5.57802	11.9864	6.02423	15.4813	15.087	0.674093	4.58431	1.01648	1.65374	high
TCGA-B0-4845	5.4411	1	1.79266	2.71102	9.45076	12.437	11.0787	6.58634	119.823	16.4334	0.0666548	8.08435	1.35745	1.87541	high
TCGA-CZ-5469	2.59178	1	1.32123	3.9144	8.34068	7.15657	10.1857	3.08838	16.2425	9.25024	0.157102	6.57903	0.883501	1.41805	high
TCGA-BP-4987	3.07945	0	0.866699	6.03634	6.46872	25.9762	7.66062	9.09621	91.7237	13.1752	0.764176	5.86786	1.34539	0.831767	low
TCGA-DV-A4VZ	1	0	1.5343	3.23631	11.8635	6.00702	11.3618	2.57201	33.1152	14.3475	2.87241	7.18288	0.854525	1.58525	high
TCGA-G6-A8L7	5.84384	0	6.68519	0.747166	4.00512	7.45429	4.47124	1.1857	209.182	6.74427	0.0293363	8.57443	0.298722	4.39476	high
TCGA-BP-4167	7.44658	0	1.3402	1.97205	3.80581	6.18367	6.85649	8.61643	14.3672	7.8541	0.847778	5.82072	0.73176	1.77892	high
TCGA-B0-5117	1.46575	0	0.389596	3.21699	3.81655	11.6064	5.54163	2.93674	5.95716	9.0179	0.674998	8.0409	1.46326	1.06626	low
TCGA-CZ-5462	0.852055	1	1.71941	3.89566	5.27252	19.5832	10.6995	0.62417	14.114	12.3595	0.147968	4.73699	1.48251	1.10888	low
TCGA-B0-4822	3.04384	1	2.86992	2.79894	7.9159	4.37937	11.5701	4.78489	20.0526	6.24677	0.452197	7.24482	0.937804	2.91745	high
TCGA-B0-5116	1.8	0	1.11535	1.92057	5.08316	18.0139	5.79643	3.85069	25.9758	10.976	0.773426	3.64983	1.19466	1.31118	high
TCGA-CJ-4918	0.254795	1	0.903598	3.7637	5.9611	18.5022	5.28468	6.9415	16.7602	16.2107	0.864085	5.03881	1.14417	0.941649	low
TCGA-MM-A563	1.61918	0	2.48059	2.83864	7.94139	14.9423	10.0211	8.3106	44.4476	16.3313	1.31212	9.44236	1.55777	2.26648	high
TCGA-G6-A8L6	0.857534	1	1.75255	0.915102	9.85228	11.1174	8.12227	6.43744	100.069	8.58226	0.380436	9.02371	0.934986	2.88588	high
TCGA-G6-A8L8	2.98904	1	1.7624	3.26056	11.6751	23.1193	15.976	1.53847	110.954	12.5663	0.820001	11.9265	1.54079	1.94487	high
TCGA-CJ-4916	3.76164	0	1.31408	3.61455	7.0797	11.3238	8.11689	2.75349	205.912	12.8219	0.495341	6.56358	1.12454	1.06738	low
TCGA-BP-4986	2.15068	0	1.17316	5.0312	7.0251	12.13	5.99205	7.47849	34.0344	16.7187	1.12981	5.293	1.25512	0.953679	low
TCGA-B2-A4SR	1.38904	0	1.02232	5.69288	6.66799	11.4163	9.15964	8.22589	222.035	16.0943	2.09062	6.91688	1.51595	0.874856	low
TCGA-MM-A564	1.66301	0	1.03695	2.46397	5.8875	12.144	4.42323	10.8675	13.1666	9.99565	2.03894	9.22154	0.900773	1.73922	high
TCGA-A3-3357	7.36438	0	1.10866	3.28354	4.84948	5.53251	10.7894	1.23654	38.7086	14.239	0.3131	3.32489	1.01082	0.950019	low
TCGA-B0-5707	7.74795	0	2.63842	2.38464	12.7822	12.6226	36.0062	0.775351	4.18713	15.2461	0.624589	6.39488	1.48053	3.5381	high
TCGA-AK-3436	5.6	0	1.45404	3.51717	3.15696	5.45543	3.3984	5.02553	264.64	10.9078	0.132828	3.24152	0.786882	0.891625	low
TCGA-B0-5085	2.10959	1	0.883903	1.52156	5.50317	5.8214	15.0784	1.4763	15.4197	8.44487	0.306408	6.73489	0.657533	1.54166	high
TCGA-A3-3358	3.58082	0	2.07399	2.00456	5.6185	10.6582	10.046	2.60436	260.28	11.7044	0.163156	4.75127	0.960195	1.44347	high
TCGA-B0-5706	6.6137	0	1.44389	2.37891	7.35963	8.62821	4.59239	12.4268	37.2546	13.2822	0.991232	4.55172	1.15804	2.05368	high
TCGA-CJ-4885	5.82192	0	1.10121	2.81663	5.03412	20.0253	5.84439	2.58035	53.8358	11.7357	0.56036	6.10794	1.06771	1.02573	low
TCGA-BP-4769	5.13973	0	0.970787	5.74475	6.3174	7.78223	12.5529	10.3599	81.7145	14.4816	12.235	9.75777	1.38358	0.991033	low
TCGA-A3-3382	1.5726	0	2.39051	4.90541	4.50637	38.968	4.06752	8.80324	451.913	13.1048	0.386191	4.33837	0.952133	0.765216	low
TCGA-BP-4762	3.67945	1	1.2684	5.75958	4.40315	16.2541	5.86745	11.8186	54.7135	19.9271	2.88931	5.07097	1.13735	0.731617	low
TCGA-B8-A7U6	1.35616	0	1.4688	2.97674	8.61715	15.2895	7.29253	7.42746	347.952	17.9355	1.1508	6.9408	1.93677	1.43263	high
TCGA-B0-5712	7.45753	0	1.04767	2.89402	8.63234	19.6226	14.9382	2.3998	412.783	21.2261	0.294886	6.02584	1.21604	0.825193	low
TCGA-BP-5174	6.18356	0	1.51594	2.44602	7.90634	9.31716	12.7697	2.46666	37.5193	13.5886	0.150284	5.49156	1.34344	1.6702	high
TCGA-A3-3363	0.873973	0	3.5181	3.22306	6.63199	11.4455	8.56483	0.979389	8.7506	22.2003	0.0241464	4.09446	1.38907	1.42004	high
TCGA-DV-5573	3.09589	0	1.8099	3.93618	8.01872	13.5898	8.36532	4.6238	75.775	16.4471	1.60421	5.75979	1.47107	1.28648	high
TCGA-B0-4849	0.189041	1	1.34171	4.66556	9.81878	23.8542	9.10299	4.93644	198.87	19.1848	2.74637	7.46448	1.42581	0.908546	low
TCGA-CJ-4638	1.18082	1	1.0745	1.31676	5.47083	8.63035	17.6949	2.01678	11.8854	9.32812	1.3449	5.15172	1.01751	1.76289	high
TCGA-CZ-4857	3.92329	1	3.31295	3.59772	6.4317	5.11426	6.73312	6.38746	29.6846	10.6114	0.359859	5.26404	1.10857	2.28129	high
TCGA-CJ-4636	5.27123	0	1.77066	2.94098	5.60206	5.8264	8.17692	5.87299	24.3007	14.1492	1.51142	4.96484	1.0453	1.43974	high
TCGA-CW-6087	0.112329	1	2.51827	3.18016	9.66695	7.50709	14.9343	2.04714	5.65013	22.7781	1.20412	4.86535	1.737	1.68229	high
TCGA-B0-4842	4.72329	1	1.64643	1.1945	5.17189	8.19644	11.5068	3.57416	8.26233	7.99418	1.55878	6.19447	0.487921	1.83264	high
TCGA-BP-4961	5.30137	0	0.658679	6.77064	6.00773	18.1086	5.47976	7.26854	304.084	14.3824	5.38413	4.69098	1.28963	0.511656	low
TCGA-CJ-4905	4.09863	0	0.76246	4.91398	6.40774	29.0153	7.76936	10.8166	115.29	17.0392	3.48662	5.22191	1.3592	0.82495	low
TCGA-CJ-4637	6.10137	1	2.52602	3.64984	8.72835	9.59564	13.2236	5.42861	24.0652	16.3804	0.395388	6.53729	1.80203	2.15393	high
TCGA-CZ-4858	5.32329	0	2.72473	2.44013	4.93615	1.0934	4.67018	6.90661	5.72885	16.9413	0.892554	5.38001	1.52949	2.00171	high
TCGA-CW-6088	8.8274	0	0.974772	6.35763	6.34569	35.6584	6.37172	6.50907	106.599	21.6141	20.8549	5.03152	1.44255	0.370808	low
TCGA-B0-4699	0.30137	1	2.10121	7.06073	6.97923	5.77817	11.4319	9.99631	2.12639	12.9791	0.0594866	7.31479	1.89796	1.5584	high
TCGA-CJ-6031	5.22192	0	1.27333	2.0455	5.21716	9.95476	9.889	9.5525	20.5384	13.9265	2.50495	4.91689	1.43524	1.82113	high
TCGA-BP-5198	1.65205	0	1.96571	2.61225	5.77925	10.6576	9.277	10.2355	636.612	17.1136	0.755337	4.86737	0.94248	1.14982	low
TCGA-CZ-5451	4.56986	0	1.00498	3.85811	5.61283	21.7939	8.03837	2.39082	838.506	17.1118	8.0359	5.35403	1.45439	0.457668	low
TCGA-CW-5591	6.22192	0	1.13229	3.63471	6.53264	13.5329	12.8541	9.83224	26.1109	16.0792	1.99609	5.62829	1.30884	1.39848	high
TCGA-CZ-4863	4.63288	0	1.60567	4.30026	5.70641	11.7432	7.63578	5.5007	91.9643	16.2198	1.05336	5.88174	1.67241	1.1353	low
TCGA-B8-A54K	1.28493	0	1.07615	6.14655	8.24945	9.00468	10.1198	4.85287	197.692	11.8092	1.42625	8.57421	1.29677	0.934742	low
TCGA-CZ-5465	3.7726	0	1.11752	2.04986	5.60344	26.3407	8.05834	1.67643	386.783	8.11879	2.47865	4.79774	1.03015	0.995337	low
TCGA-BP-5196	2.78904	0	1.30803	3.69814	8.26841	10.1828	10.4107	4.2735	10.322	17.6133	1.01949	6.50432	1.41827	1.25792	high

## Sheet: clinical
Id	futime	age	grade	stage
TCGA-EU-5904	551	47	1	1
TCGA-B4-5834	38	59	1	1
TCGA-A3-3383	861	52	2	1
TCGA-B0-5699	2741	53	2	1
TCGA-A3-3380	567	54	2	1
TCGA-A3-3311	1191	57	2	1
TCGA-CZ-4859	1787	59	2	1
TCGA-BP-4353	375	61	2	1
TCGA-B4-5378	175	62	2	1
TCGA-B0-5705	3668	65	2	1
TCGA-AK-3425	3343	68	2	1
TCGA-A3-3331	1257	86	2	1
TCGA-B0-5098	1584	53	3	1
TCGA-A3-3378	630	60	3	1
TCGA-CZ-5986	373	61	3	1
TCGA-EU-5905	119	67	3	1
TCGA-B0-5102	2764	74	3	1
TCGA-CZ-4866	1768	79	3	1
TCGA-A3-3336	1043	75	4	1
TCGA-AS-3778	43	35	1	1
TCGA-A3-3326	1137	47	1	1
TCGA-CW-6093	3146	73	1	1
TCGA-DV-5568	370	26	2	1
TCGA-DV-5569	355	29	2	1
TCGA-DV-5574	723	37	2	1
TCGA-CJ-4908	1531	38	2	1
TCGA-BP-5194	408	39	2	1
TCGA-DV-5567	910	40	2	1
TCGA-BP-4758	2208	40	2	1
TCGA-DV-5573	1130	41	2	1
TCGA-B8-5545	522	42	2	1
TCGA-BP-4765	2184	43	2	1
TCGA-CW-6096	2701	44	2	1
TCGA-BP-5174	2257	45	2	1
TCGA-A3-3365	873	46	2	1
TCGA-BP-5008	1071	46	2	1
TCGA-BP-4965	1871	46	2	1
TCGA-A3-3385	1993	46	2	1
TCGA-BP-4961	1935	47	2	1
TCGA-BP-4789	1489	48	2	1
TCGA-A3-3387	617	49	2	1
TCGA-BP-5186	693	50	2	1
TCGA-B0-5697	1835	50	2	1
TCGA-BP-4759	2372	50	2	1
TCGA-A3-3322	1478	51	2	1
TCGA-A3-3376	1696	51	2	1
TCGA-CW-5583	2489	51	2	1
TCGA-BP-4776	411	52	2	1
TCGA-DV-5575	1006	52	2	1
TCGA-A3-3325	1170	52	2	1
TCGA-CW-5589	2378	52	2	1
TCGA-BP-4331	2454	52	2	1
TCGA-BP-5196	1018	53	2	1
TCGA-BP-5180	2263	53	2	1
TCGA-BP-5187	406	54	2	1
TCGA-BP-4991	1413	54	2	1
TCGA-BP-4964	1862	54	2	1
TCGA-BP-4782	354	55	2	1
TCGA-DV-5576	727	55	2	1
TCGA-BP-4775	1843	55	2	1
TCGA-BP-5170	2412	55	2	1
TCGA-BP-4999	1266	56	2	1
TCGA-BP-4801	1124	57	2	1
TCGA-A3-3358	1307	57	2	1
TCGA-BP-4774	1885	57	2	1
TCGA-AK-3460	951	58	2	1
TCGA-BP-5192	714	59	2	1
TCGA-DV-5565	1329	59	2	1
TCGA-CZ-5982	2042	59	2	1
TCGA-A3-3362	1559	60	2	1
TCGA-BP-5006	840	61	2	1
TCGA-CJ-4905	1496	62	2	1
TCGA-BP-4969	1794	63	2	1
TCGA-BP-4769	1876	63	2	1
TCGA-B0-5106	1598	64	2	1
TCGA-BP-4177	1670	65	2	1
TCGA-DV-5566	1398	67	2	1
TCGA-BP-4784	1854	67	2	1
TCGA-BP-4349	372	68	2	1
TCGA-3Z-A93Z	385	69	2	1
TCGA-BP-4760	2361	69	2	1
TCGA-CZ-4865	166	70	2	1
TCGA-B0-5110	1092	71	2	1
TCGA-BP-4768	400	72	2	1
TCGA-B0-5120	493	72	2	1
TCGA-BP-4988	828	72	2	1
TCGA-AK-3461	853	72	2	1
TCGA-B8-4154	255	73	2	1
TCGA-B2-5635	315	74	2	1
TCGA-BP-4795	620	74	2	1
TCGA-BP-5173	62	75	2	1
TCGA-BP-5195	749	75	2	1
TCGA-BP-5168	1463	75	2	1
TCGA-BP-4344	1666	75	2	1
TCGA-B0-4945	2145	75	2	1
TCGA-BP-4790	1111	76	2	1
TCGA-B0-5700	1082	77	2	1
TCGA-BP-5176	1590	78	2	1
TCGA-CW-5588	2017	78	2	1
TCGA-B2-5636	265	79	2	1
TCGA-BP-4763	1270	79	2	1
TCGA-CZ-4853	774	82	2	1
TCGA-A3-3359	2504	82	2	1
TCGA-AK-3450	1508	85	2	1
TCGA-B0-4823	454	88	2	1
TCGA-B0-5707	2828	39	3	1
TCGA-BP-4807	211	42	3	1
TCGA-BP-4762	1343	42	3	1
TCGA-CJ-4886	1952	42	3	1
TCGA-BP-4766	1462	43	3	1
TCGA-BP-5177	293	46	3	1
TCGA-BP-4777	1731	46	3	1
TCGA-BP-4998	932	49	3	1
TCGA-B0-4824	1657	49	3	1
TCGA-B0-4834	2090	49	3	1
TCGA-CJ-5671	1943	51	3	1
TCGA-BP-5004	1126	53	3	1
TCGA-BP-5184	1133	54	3	1
TCGA-BP-4994	1308	54	3	1
TCGA-BP-5185	1132	56	3	1
TCGA-BP-5182	1165	56	3	1
TCGA-BP-4993	177	58	3	1
TCGA-AK-3440	1745	58	3	1
TCGA-BP-5175	932	60	3	1
TCGA-B8-5159	240	61	3	1
TCGA-BP-5190	1011	61	3	1
TCGA-B8-4148	379	63	3	1
TCGA-B0-5083	1045	63	3	1
TCGA-CJ-6030	2299	65	3	1
TCGA-B0-5691	3431	66	3	1
TCGA-BP-4986	785	75	3	1
TCGA-B0-5077	1317	77	3	1
TCGA-BP-4976	1632	77	3	1
TCGA-BP-4781	2080	78	3	1
TCGA-B2-5641	324	79	3	1
TCGA-B2-4099	374	83	3	1
TCGA-CJ-5672	1972	84	3	1
TCGA-CJ-4889	1946	63	4	1
TCGA-CJ-6027	1855	77	4	1
TCGA-BP-4970	433	44	3	3
TCGA-A3-3320	1508	52	1	1
TCGA-A3-3323	1106	53	1	1
TCGA-B0-5690	2408	53	1	1
TCGA-BP-4165	3037	64	1	1
TCGA-A3-3349	1385	34	2	1
TCGA-B8-5546	505	38	2	1
TCGA-CZ-5988	693	38	2	1
TCGA-B0-5117	535	40	2	1
TCGA-B8-5552	392	41	2	1
TCGA-B8-4146	511	41	2	1
TCGA-BP-4987	1124	41	2	1
TCGA-CJ-4899	1528	42	2	1
TCGA-BP-5001	1177	43	2	1
TCGA-B0-5399	652	46	2	1
TCGA-CZ-4862	1843	46	2	1
TCGA-B0-5693	3076	47	2	1
TCGA-A3-3370	2274	48	2	1
TCGA-A3-3374	1314	51	2	1
TCGA-BP-4326	1625	53	2	1
TCGA-EU-5906	206	55	2	1
TCGA-B2-5633	358	56	2	1
TCGA-B0-5121	554	56	2	1
TCGA-B0-5710	1459	57	2	1
TCGA-BP-5181	1495	58	2	1
TCGA-BP-4804	1459	59	2	1
TCGA-CJ-4634	1820	60	2	1
TCGA-CW-6088	3222	60	2	1
TCGA-B0-5119	59	61	2	1
TCGA-B4-5836	141	61	2	1
TCGA-B2-4102	202	61	2	1
TCGA-B0-5695	1420	61	2	1
TCGA-BP-4756	374	62	2	1
TCGA-CJ-4920	139	64	2	1
TCGA-BP-4176	1955	64	2	1
TCGA-BP-4325	2964	64	2	1
TCGA-CJ-4892	1521	65	2	1
TCGA-BP-4162	3074	65	2	1
TCGA-B8-5553	435	67	2	1
TCGA-CZ-4854	1404	68	2	1
TCGA-BP-4158	3377	69	2	1
TCGA-BP-4340	562	70	2	1
TCGA-A3-3319	1130	70	2	1
TCGA-BP-4159	2601	70	2	1
TCGA-B0-5702	1605	71	2	1
TCGA-B2-4098	51	72	2	1
TCGA-AK-3434	2087	72	2	1
TCGA-BP-4170	2343	72	2	1
TCGA-B2-3924	371	73	2	1
TCGA-A3-3329	1624	75	2	1
TCGA-A3-3328	1385	79	2	1
TCGA-AK-3444	1471	80	2	1
TCGA-B0-4839	1639	80	2	1
TCGA-B0-4833	2386	82	2	1
TCGA-BP-5000	563	40	3	1
TCGA-BP-4975	1433	40	3	1
TCGA-BP-4968	1746	40	3	1
TCGA-BP-4982	1014	42	3	1
TCGA-BP-4338	2859	43	3	1
TCGA-CW-5581	2799	44	3	1
TCGA-AK-3458	1168	48	3	1
TCGA-CJ-4635	1416	48	3	1
TCGA-BP-4959	2660	49	3	1
TCGA-CJ-4903	1560	50	3	1
TCGA-A3-3324	1186	51	3	1
TCGA-CZ-5984	1491	51	3	1
TCGA-BP-5009	1092	52	3	1
TCGA-B8-5549	194	53	3	1
TCGA-B0-5088	563	53	3	1
TCGA-B0-5812	2963	53	3	1
TCGA-A3-3373	1621	54	3	1
TCGA-CJ-6031	1906	54	3	1
TCGA-BP-4977	454	57	3	1
TCGA-A3-3313	735	59	3	1
TCGA-CJ-5686	2038	59	3	1
TCGA-B8-4621	431	63	3	1
TCGA-B0-4837	1378	63	3	1
TCGA-BP-4963	1834	63	3	1
TCGA-A3-3306	1120	67	3	1
TCGA-A3-3346	137	68	3	1
TCGA-BP-4995	1371	68	3	1
TCGA-CW-6090	2552	68	3	1
TCGA-A3-3382	574	69	3	1
TCGA-B0-4838	834	69	3	1
TCGA-A3-3367	2270	72	3	1
TCGA-B0-5703	1203	73	3	1
TCGA-CJ-4874	2283	73	3	1
TCGA-BP-4161	2746	74	3	1
TCGA-CJ-4893	750	76	3	1
TCGA-B0-5698	2583	77	3	1
TCGA-CJ-5683	1889	78	3	1
TCGA-AK-3454	874	84	3	1
TCGA-CJ-4872	1435	51	4	1
TCGA-BP-5189	822	60	4	1
TCGA-BP-4992	501	66	4	1
TCGA-BP-5169	193	70	4	1
TCGA-A3-3347	1610	76	2	3
TCGA-CZ-5469	946	41	2	2
TCGA-BP-5007	1140	45	2	2
TCGA-B0-5706	2414	45	2	2
TCGA-CJ-4642	1628	47	2	2
TCGA-CJ-4639	2308	49	2	2
TCGA-A3-3363	319	50	2	2
TCGA-AK-3429	2017	54	2	2
TCGA-AK-3453	1397	58	2	2
TCGA-CZ-5985	1629	58	2	2
TCGA-BP-4962	1785	58	2	2
TCGA-B2-3923	362	59	2	2
TCGA-CZ-5989	1599	60	2	2
TCGA-CZ-4861	446	63	2	2
TCGA-A3-3317	1491	67	2	2
TCGA-CZ-5452	1556	69	2	2
TCGA-BP-4327	109	75	2	2
TCGA-CZ-5463	662	76	2	2
TCGA-BP-4169	701	76	2	2
TCGA-B0-4852	1121	78	2	2
TCGA-AK-3447	1217	83	2	2
TCGA-BP-4960	2172	46	3	2
TCGA-BP-4173	1893	47	3	2
TCGA-AK-3456	1143	48	3	2
TCGA-AK-3451	1481	48	3	2
TCGA-B0-4816	1371	49	3	2
TCGA-BP-4174	1879	49	3	2
TCGA-A3-3316	1493	57	3	2
TCGA-CZ-5456	1558	57	3	2
TCGA-CJ-4912	1657	61	3	2
TCGA-AK-3431	1853	62	3	2
TCGA-A3-3357	2688	62	3	2
TCGA-CJ-6032	2548	63	3	2
TCGA-B0-4818	510	68	3	2
TCGA-CZ-5451	1668	74	3	2
TCGA-A3-3343	945	79	3	2
TCGA-BP-4342	2256	79	3	2
TCGA-CZ-4864	1315	86	3	2
TCGA-CZ-4858	1943	39	4	2
TCGA-BP-5200	1063	44	4	2
TCGA-BP-5199	1355	58	4	2
TCGA-B0-4822	1111	78	4	2
TCGA-CJ-4869	2554	49	2	3
TCGA-A3-3351	910	42	2	2
TCGA-B2-4101	188	52	3	2
TCGA-CJ-5675	2430	70	3	2
TCGA-A3-3335	1886	41	4	2
TCGA-CJ-4876	1955	57	3	2
TCGA-CJ-4643	1793	67	3	2
TCGA-A3-3372	735	64	2	3
TCGA-BP-4332	1133	36	2	3
TCGA-B8-4151	280	51	2	3
TCGA-BP-4351	970	51	2	3
TCGA-BP-4164	992	51	2	3
TCGA-B0-5108	911	54	2	3
TCGA-B0-4718	616	57	2	3
TCGA-CJ-4870	1498	58	2	3
TCGA-BP-4167	2718	59	2	3
TCGA-BP-4330	1888	60	2	3
TCGA-CJ-5684	2231	61	2	3
TCGA-CZ-5466	685	67	2	3
TCGA-BP-4341	1589	67	2	3
TCGA-BP-4160	2881	67	2	3
TCGA-B0-5113	359	69	2	3
TCGA-B8-4620	226	70	2	3
TCGA-CJ-4878	2186	71	2	3
TCGA-BP-4329	845	75	2	3
TCGA-BP-4967	205	76	2	3
TCGA-B0-5075	637	77	2	3
TCGA-BP-5191	967	79	2	3
TCGA-AK-3426	885	37	3	3
TCGA-BP-4971	1487	40	3	3
TCGA-CJ-4881	2014	41	3	3
TCGA-BP-4972	1502	43	3	3
TCGA-CZ-5458	1558	43	3	3
TCGA-B0-4810	478	47	3	3
TCGA-BP-4973	1384	47	3	3
TCGA-B0-4811	1417	48	3	3
TCGA-B0-4849	69	51	3	3
TCGA-CJ-4636	1924	51	3	3
TCGA-BP-4334	645	56	3	3
TCGA-B0-4843	320	57	3	3
TCGA-BP-5183	1291	57	3	3
TCGA-CJ-4882	1883	57	3	3
TCGA-BP-4989	118	58	3	3
TCGA-CJ-4894	841	58	3	3
TCGA-B0-4696	866	58	3	3
TCGA-BP-4163	2839	60	3	3
TCGA-CJ-4902	1520	61	3	3
TCGA-B0-5709	3117	62	3	3
TCGA-BP-4343	1912	64	3	3
TCGA-AK-3445	1280	69	3	3
TCGA-CJ-4916	1373	69	3	3
TCGA-B8-5550	434	71	3	3
TCGA-B0-5694	480	71	3	3
TCGA-CJ-4884	1759	72	3	3
TCGA-B0-5100	1913	72	3	3
TCGA-B8-4153	405	74	3	3
TCGA-A3-3352	561	74	3	3
TCGA-B0-4710	96	75	3	3
TCGA-BP-4981	1097	75	3	3
TCGA-B0-5085	770	76	3	3
TCGA-BP-4803	204	79	3	3
TCGA-CJ-4897	1808	79	3	3
TCGA-EU-5907	127	81	3	3
TCGA-B0-5095	245	81	3	3
TCGA-CJ-4873	1776	85	3	3
TCGA-CW-6097	571	32	4	3
TCGA-CJ-4913	1173	45	4	3
TCGA-CJ-4640	1998	49	4	3
TCGA-B8-5158	293	56	4	3
TCGA-BP-4761	182	57	4	3
TCGA-BP-4355	953	59	4	3
TCGA-B0-4706	65	61	4	3
TCGA-CZ-5457	1547	62	4	3
TCGA-B0-4707	600	63	4	3
TCGA-BP-5010	878	63	4	3
TCGA-B0-4815	1588	65	4	3
TCGA-BP-4983	1413	67	4	3
TCGA-B0-5696	1727	69	4	3
TCGA-B0-4693	77	72	4	3
TCGA-BP-4985	952	72	4	3
TCGA-B0-4842	1724	73	4	3
TCGA-CZ-5467	73	86	4	3
TCGA-B0-5097	665	59	2	3
TCGA-AK-3428	2223	62	2	3
TCGA-CW-5587	2226	62	2	3
TCGA-B4-5832	155	65	2	3
TCGA-BP-4347	1367	74	2	3
TCGA-B0-4713	202	76	2	3
TCGA-CZ-5465	1377	76	2	3
TCGA-B0-5081	362	79	2	3
TCGA-BP-4797	1107	34	3	3
TCGA-CJ-4901	1450	47	3	3
TCGA-CJ-5676	2575	47	3	3
TCGA-B0-5711	2931	50	3	3
TCGA-CZ-4863	1691	51	3	3
TCGA-B0-5116	657	52	3	3
TCGA-B0-4848	883	54	3	3
TCGA-BP-4346	1493	57	3	3
TCGA-CJ-4907	1499	58	3	3
TCGA-AK-3430	480	61	3	3
TCGA-BP-4345	1516	62	3	3
TCGA-CZ-5459	1515	63	3	3
TCGA-A3-3307	1436	66	3	3
TCGA-B0-5692	1487	66	3	3
TCGA-B0-4821	1230	68	3	3
TCGA-BP-4799	1133	70	3	3
TCGA-AK-3455	683	71	3	3
TCGA-BP-5198	603	72	3	3
TCGA-CW-5584	164	74	3	3
TCGA-B0-5713	1865	75	3	3
TCGA-B0-5099	485	88	3	3
TCGA-B0-5400	1132	59	4	3
TCGA-B0-5701	1732	65	4	3
TCGA-B0-5109	587	69	4	3
TCGA-B0-4694	106	72	4	3
TCGA-CJ-5679	679	73	4	3
TCGA-B0-4827	885	77	4	3
TCGA-B0-4817	1019	81	3	3
TCGA-CJ-4891	819	57	4	3
TCGA-B0-5402	449	64	4	4
TCGA-BP-4770	329	73	4	4
TCGA-B0-4698	42	75	4	4
TCGA-B0-5092	459	53	3	4
TCGA-CZ-5462	311	83	3	4
TCGA-CZ-5461	330	52	4	4
TCGA-G6-A5PC	242	54	4	4
TCGA-AK-3436	2044	40	2	4
TCGA-CZ-5454	722	63	2	4
TCGA-B0-5115	797	43	3	4
TCGA-B0-4691	139	55	3	4
TCGA-B0-4841	204	63	3	4
TCGA-B0-5712	2722	68	3	4
TCGA-B0-4828	307	79	3	4
TCGA-B0-5107	927	65	4	4
TCGA-CJ-5678	574	62	3	4
TCGA-CJ-4637	2227	52	4	4
TCGA-B2-5639	417	46	3	4
TCGA-B4-5377	365	68	3	4
TCGA-B0-4846	1200	52	2	4
TCGA-CW-5591	2271	56	2	4
TCGA-B0-4845	1986	70	2	4
TCGA-B0-5084	222	33	3	4
TCGA-CJ-4868	646	42	3	4
TCGA-CJ-5681	552	44	3	4
TCGA-CJ-4644	336	48	3	4
TCGA-CJ-4887	932	48	3	4
TCGA-CW-5590	1075	51	3	4
TCGA-CZ-4857	1432	56	3	4
TCGA-B8-4622	181	57	3	4
TCGA-B0-4844	313	60	3	4
TCGA-B0-4847	793	60	3	4
TCGA-CJ-4904	1792	60	3	4
TCGA-B0-5080	342	63	3	4
TCGA-CJ-4885	2125	64	3	4
TCGA-BP-4335	475	65	3	4
TCGA-B0-4701	238	66	3	4
TCGA-B8-4143	709	66	3	4
TCGA-CJ-4875	2353	67	3	4
TCGA-CW-5580	1964	73	3	4
TCGA-B0-4712	1337	76	3	4
TCGA-CJ-4638	431	46	4	4
TCGA-B0-4703	182	51	4	4
TCGA-CJ-6033	224	54	4	4
TCGA-CJ-5677	782	54	4	4
TCGA-CJ-4641	1661	55	4	4
TCGA-BP-4974	211	58	4	4
TCGA-CJ-6028	1625	58	4	4
TCGA-BP-4787	480	59	4	4
TCGA-CJ-4888	1567	59	4	4
TCGA-CJ-5682	1883	60	4	4
TCGA-CW-6087	41	61	4	4
TCGA-BP-4771	162	62	4	4
TCGA-CJ-4895	1200	62	4	4
TCGA-CJ-4923	572	63	4	4
TCGA-CJ-4871	2423	63	4	4
TCGA-CJ-4918	93	64	4	4
TCGA-CJ-5680	768	65	4	4
TCGA-BP-5178	1912	71	4	4
TCGA-CJ-4890	2085	72	4	4
TCGA-CW-5585	2609	51	2	4
TCGA-CZ-5460	1430	55	2	4
TCGA-CZ-5987	445	60	2	4
TCGA-B0-5094	333	62	2	4
TCGA-CZ-5464	1492	69	2	4
TCGA-B0-4836	1238	61	3	4
TCGA-B0-4714	99	81	3	4
TCGA-B0-4697	578	46	4	4
TCGA-B0-4819	183	60	4	4
TCGA-CZ-5455	561	63	4	4
TCGA-BP-5201	951	63	4	4
TCGA-BP-4352	344	74	4	4
TCGA-CZ-5468	59	84	4	4
TCGA-B0-4814	168	58	3	4
TCGA-B0-4690	43	65	3	4
TCGA-BP-4354	1034	40	4	4
TCGA-B0-4688	101	46	4	4
TCGA-CZ-4860	206	60	4	4
TCGA-B0-4700	1980	60	4	4
TCGA-CJ-4900	1714	69	4	4
TCGA-B0-4699	110	74	4	4

## Sheet: Diff gene
gene	conMean	treatMean	logFC	pValue
NOTCH1	5.58222	8.7449	0.647603	0.00148987
ANKRD13C	5.93242	5.56252	-0.0928809	0.238382
PDK4	113.694	169.731	0.578085	0.67606
STK11	4.83115	5.66129	0.228765	0.0179139
DAPK2	0.378628	0.588548	0.636378	0.729981
PIK3CA	4.26545	3.78683	-0.171706	0.18062
CEACAM6	0.0640276	0.0550292	-0.218495	0.541905
TLE1	5.81366	7.1018	0.288738	0.126042
MAP3K7	5.6792	5.66662	-0.00319976	0.458652
NTRK2	7.58135	2.06418	-1.87688	1.14674e-11
ITGA5	8.0895	28.6068	1.82224	6.48222e-08
BCL2	8.48914	13.9512	0.716696	2.8022e-05
PTK2	10.335	9.74267	-0.0851515	0.182781
MTOR	9.64181	4.37944	-1.13856	4.89292e-14
CEACAM5	0.0987772	0.0437136	-1.17609	0.638173
BMF	5.69796	3.45244	-0.72283	0.000868926
CRYBA1	0.0280083	0.0987947	1.81858	9.58134e-06
CAV1	14.3914	66.1395	2.2003	4.10656e-14
AKT1	8.93057	9.4089	0.075275	0.728175
SRC	8.25171	8.76505	0.0870689	0.779734
TFDP1	16.234	13.7375	-0.240903	0.000114628
AES	59.3391	61.2306	0.0452684	0.798697
ZNF304	3.73368	3.60393	-0.0510267	0.615276
PTRH2	1.94898	3.13372	0.68516	7.80381e-09
SNAI2	6.07536	5.57076	-0.125096	0.0191725
MYBBP1A	4.62317	6.51539	0.494969	0.000180399
MCL1	101.428	103.033	0.0226532	0.720967
SIK1	1.15053	0.753565	-0.610491	0.0276102
CHEK2	0.741759	1.61962	1.12664	4.35876e-09
ITGB1	61.344	75.4512	0.298621	0.0814076
IKBKG	1.05229	1.26015	0.260066	0.00145627
E2F1	0.628001	2.64263	2.07314	5.33646e-09
BRMS1	13.0442	14.2374	0.126279	0.467073
TSC2	5.62545	6.61631	0.234059	0.0185039
